# Supplementary material for: Assessing the Reliability of Template-Based Clustering for Tractography in Healthy Human Adults
Source: Front Neuroinform. 2022 Feb 17;16:777853. doi: 10.3389/fninf.2022.777853 (PMC8891507; doi:10.3389/fninf.2022.777853)
Supplement: Supplementary file 1 [file Table_1.XLSX]

## Sheet: Table S1
Table S1. Evaluated metrics for all clusters across the two datasets using two different clustering techniques. Datasets evaulated with QuickBundles are identified by the suffix "QB". Tracts with at least one subject or session failing to cluster are indicated by the missing evaluation.
Dataset	Label	Euclidean Distance [mm] (avg ± sd)	Streamline Count (avg ± sd) [cv]	wDSC - Clusters (avg ± sd)	ICC [95% CI]
MyConnectome	0	1.071 ± 0.849	2988 ± 972 [32.534]	0.925 ± 0.032	0.947 [0.90, 0.98]
MyConnectome	1	0.979 ± 0.561	883 ± 318 [36.022]	0.910 ± 0.052	0.868 [0.77, 0.94]
MyConnectome	2	0.915 ± 0.627	2108 ± 844 [40.028]	0.909 ± 0.044	0.954 [0.90, 0.98]
MyConnectome	3	3.627 ± 2.123	624 ± 367 [58.754]	0.622 ± 0.125	0.960 [0.93, 0.98]
MyConnectome	4	1.752 ± 1.216	3687 ± 1682 [45.634]	0.920 ± 0.035	0.879 [0.76, 0.95]
MyConnectome	5	1.932 ± 1.532	3261 ± 1024 [31.399]	0.859 ± 0.080	0.767 [0.59, 0.89]
MyConnectome	6	-	-	-	-
MyConnectome	7	1.017 ± 1.083	1419 ± 547 [38.551]	0.897 ± 0.050	0.913 [0.82, 0.96]
MyConnectome	8	4.268 ± 3.407	4676 ± 1615 [34.537]	0.911 ± 0.038	0.674 [0.44, 0.84]
MyConnectome	9	3.137 ± 1.466	882 ± 806 [91.436]	0.642 ± 0.106	0.803 [0.65, 0.91]
MyConnectome	10	1.437 ± 1.785	5341 ± 810 [15.169]	0.942 ± 0.022	0.814 [0.66, 0.91]
MyConnectome	11	2.136 ± 1.351	2921 ± 1307 [44.753]	0.890 ± 0.086	0.872 [0.73, 0.95]
MyConnectome	12	1.156 ± 0.801	1932 ± 901 [46.640]	0.918 ± 0.049	0.972 [0.95, 0.99]
MyConnectome	13	2.833 ± 1.865	4461 ± 1887 [42.298]	0.829 ± 0.087	0.259 [0.12, 0.47]
MyConnectome	14	1.785 ± 1.136	996 ± 535 [53.682]	0.842 ± 0.100	0.943 [0.87, 0.98]
MyConnectome	15	1.088 ± 0.969	2069 ± 829 [40.059]	0.918 ± 0.060	0.945 [0.88, 0.98]
MyConnectome	16	1.640 ± 1.590	886 ± 368 [41.513]	0.842 ± 0.079	0.737 [0.55, 0.87]
MyConnectome	17	4.657 ± 2.152	169 ± 199 [118.000]	0.334 ± 0.206	0.292 [0.16, 0.49]
MyConnectome	18	1.569 ± 1.097	2357 ± 885 [37.569]	0.837 ± 0.061	0.725 [0.56, 0.86]
MyConnectome	19	3.918 ± 2.090	1191 ± 649 [54.479]	0.721 ± 0.121	0.573 [0.36, 0.77]
MyConnectome	20	0.975 ± 1.166	1983 ± 698 [35.217]	0.930 ± 0.047	0.953 [0.89, 0.98]
MyConnectome	21	1.622 ± 1.180	1246 ± 701 [56.246]	0.869 ± 0.073	0.878 [0.74, 0.95]
MyConnectome	22	2.103 ± 3.036	788 ± 172 [21.872]	0.833 ± 0.075	0.882 [0.77, 0.95]
MyConnectome	23	3.130 ± 2.335	3162 ± 1867 [59.037]	0.760 ± 0.120	0.381 [0.19, 0.61]
MyConnectome	24	2.854 ± 1.381	784 ± 518 [66.114]	0.714 ± 0.120	0.960 [0.93, 0.98]
MyConnectome	25	0.863 ± 0.555	590 ± 270 [45.770]	0.876 ± 0.073	0.904 [0.83, 0.96]
MyConnectome	26	1.066 ± 0.671	425 ± 160 [37.565]	0.790 ± 0.074	0.990 [0.98, 1.00]
MyConnectome	27	3.218 ± 1.296	503 ± 276 [54.891]	0.702 ± 0.105	0.871 [0.74, 0.94]
MyConnectome	28	2.163 ± 1.604	1883 ± 611 [32.433]	0.922 ± 0.024	0.931 [0.85, 0.97]
MyConnectome	29	3.810 ± 1.739	988 ± 1018 [103.097]	0.599 ± 0.163	0.300 [0.14, 0.52]
MyConnectome	30	8.539 ± 4.894	1744 ± 1419 [81.393]	0.637 ± 0.135	0.294 [0.14, 0.51]
MyConnectome	31	2.290 ± 1.151	630 ± 350 [55.622]	0.723 ± 0.089	0.975 [0.96, 0.99]
MyConnectome	32	1.940 ± 1.028	1284 ± 842 [65.607]	0.751 ± 0.105	0.736 [0.54, 0.87]
MyConnectome	33	2.031 ± 1.928	1714 ± 828 [48.309]	0.840 ± 0.097	0.896 [0.79, 0.95]
MyConnectome	34	2.028 ± 1.917	2278 ± 807 [35.442]	0.843 ± 0.073	0.906 [0.83, 0.96]
MyConnectome	35	1.460 ± 0.628	576 ± 343 [59.483]	0.816 ± 0.077	0.926 [0.84, 0.97]
MyConnectome	36	2.015 ± 1.957	2052 ± 967 [47.117]	0.855 ± 0.102	0.694 [0.47, 0.85]
MyConnectome	37	0.984 ± 0.836	1508 ± 645 [42.795]	0.927 ± 0.042	0.977 [0.95, 0.99]
MyConnectome	38	1.954 ± 1.874	1567 ± 440 [28.088]	0.851 ± 0.071	0.913 [0.81, 0.96]
MyConnectome	39	1.545 ± 1.869	1781 ± 608 [34.104]	0.881 ± 0.060	0.931 [0.87, 0.97]
MyConnectome	40	3.795 ± 2.386	1308 ± 883 [67.501]	0.671 ± 0.132	0.385 [0.19, 0.62]
MyConnectome	41	2.756 ± 1.677	901 ± 545 [60.501]	0.805 ± 0.103	0.790 [0.60, 0.90]
MyConnectome	42	1.301 ± 0.799	699 ± 398 [56.950]	0.853 ± 0.057	0.899 [0.79, 0.96]
MyConnectome	43	1.407 ± 0.960	1817 ± 1043 [57.416]	0.860 ± 0.079	0.837 [0.68, 0.93]
MyConnectome	44	1.050 ± 0.817	1088 ± 402 [36.955]	0.913 ± 0.047	0.987 [0.97, 0.99]
MyConnectome	45	1.228 ± 1.047	1213 ± 505 [41.663]	0.873 ± 0.072	0.958 [0.90, 0.98]
MyConnectome	46	1.538 ± 1.427	741 ± 385 [52.001]	0.790 ± 0.113	0.919 [0.83, 0.97]
MyConnectome	47	1.191 ± 0.921	661 ± 425 [64.283]	0.783 ± 0.108	0.801 [0.64, 0.91]
MyConnectome	48	1.911 ± 1.080	270 ± 95 [35.117]	0.574 ± 0.080	0.713 [0.54, 0.85]
MyConnectome	49	0.795 ± 0.643	595 ± 171 [28.795]	0.898 ± 0.042	0.918 [0.86, 0.96]
MyConnectome	50	0.695 ± 0.434	786 ± 347 [44.136]	0.818 ± 0.086	0.971 [0.95, 0.99]
MyConnectome	51	2.117 ± 1.490	1543 ± 906 [58.708]	0.765 ± 0.123	0.733 [0.52, 0.87]
MyConnectome	52	1.380 ± 0.726	249 ± 129 [51.624]	0.679 ± 0.095	0.983 [0.97, 0.99]
MyConnectome	53	1.335 ± 1.435	1423 ± 441 [30.995]	0.852 ± 0.079	0.900 [0.79, 0.96]
MyConnectome	54	2.335 ± 1.285	1229 ± 709 [57.684]	0.780 ± 0.133	0.727 [0.53, 0.87]
MyConnectome	55	1.081 ± 0.602	445 ± 151 [33.954]	0.742 ± 0.073	0.966 [0.93, 0.99]
MyConnectome	56	1.734 ± 1.352	1477 ± 597 [40.384]	0.861 ± 0.056	0.825 [0.66, 0.92]
MyConnectome	57	3.419 ± 1.304	343 ± 253 [73.833]	0.494 ± 0.133	0.933 [0.88, 0.97]
MyConnectome	58	1.824 ± 0.965	645 ± 453 [70.281]	0.763 ± 0.094	0.946 [0.89, 0.98]
MyConnectome	59	2.130 ± 1.381	1163 ± 589 [50.643]	0.787 ± 0.080	0.800 [0.64, 0.91]
MyConnectome	60	1.999 ± 1.878	1244 ± 637 [51.189]	0.766 ± 0.091	0.438 [0.25, 0.66]
MyConnectome	61	2.158 ± 1.666	1731 ± 1146 [66.167]	0.795 ± 0.100	0.823 [0.68, 0.92]
MyConnectome	62	0.956 ± 0.661	1176 ± 551 [46.859]	0.904 ± 0.072	0.966 [0.93, 0.99]
MyConnectome	63	2.670 ± 1.469	3241 ± 1710 [52.780]	0.907 ± 0.056	0.889 [0.77, 0.95]
MyConnectome	64	1.972 ± 0.898	256 ± 129 [50.309]	0.620 ± 0.107	0.977 [0.96, 0.99]
MyConnectome	65	3.350 ± 2.023	2541 ± 1013 [39.873]	0.847 ± 0.068	0.672 [0.43, 0.84]
MyConnectome	66	2.177 ± 1.488	468 ± 217 [46.375]	0.739 ± 0.099	0.958 [0.91, 0.98]
MyConnectome	67	1.313 ± 1.107	1932 ± 1124 [58.162]	0.913 ± 0.045	0.918 [0.81, 0.97]
MyConnectome	68	1.648 ± 1.089	1656 ± 967 [58.422]	0.814 ± 0.092	0.853 [0.75, 0.93]
MyConnectome	69	2.243 ± 2.117	2183 ± 996 [45.651]	0.855 ± 0.097	0.883 [0.78, 0.95]
MyConnectome	70	4.319 ± 1.786	143 ± 174 [121.976]	0.480 ± 0.149	0.373 [0.22, 0.59]
MyConnectome	71	2.285 ± 1.199	2411 ± 1071 [44.431]	0.878 ± 0.058	0.395 [0.23, 0.61]
MyConnectome	72	2.075 ± 1.541	1248 ± 616 [49.338]	0.764 ± 0.114	0.812 [0.64, 0.91]
MyConnectome	73	2.237 ± 1.612	1419 ± 652 [45.933]	0.810 ± 0.109	0.658 [0.43, 0.83]
MyConnectome	74	0.536 ± 0.418	1439 ± 517 [35.894]	0.884 ± 0.077	0.987 [0.97, 0.99]
MyConnectome	75	1.680 ± 2.240	1719 ± 357 [20.748]	0.907 ± 0.041	0.799 [0.63, 0.91]
MyConnectome	76	1.411 ± 1.052	1170 ± 779 [66.543]	0.848 ± 0.072	0.894 [0.79, 0.95]
MyConnectome	77	2.052 ± 1.584	1118 ± 392 [35.099]	0.781 ± 0.077	0.887 [0.80, 0.95]
MyConnectome	78	3.510 ± 3.539	2134 ± 701 [32.842]	0.777 ± 0.100	0.454 [0.27, 0.67]
MyConnectome	79	1.062 ± 0.799	428 ± 113 [26.446]	0.785 ± 0.068	0.983 [0.97, 0.99]
MyConnectome	80	1.894 ± 2.027	1810 ± 685 [37.847]	0.867 ± 0.085	0.970 [0.93, 0.99]
MyConnectome	81	1.552 ± 1.708	1761 ± 656 [37.267]	0.917 ± 0.054	0.983 [0.97, 0.99]
MyConnectome	82	1.585 ± 0.901	376 ± 152 [40.376]	0.691 ± 0.078	0.974 [0.95, 0.99]
MyConnectome	83	1.829 ± 1.356	1102 ± 656 [59.536]	0.861 ± 0.068	0.966 [0.93, 0.99]
MyConnectome	84	1.560 ± 0.944	629 ± 489 [77.766]	0.794 ± 0.091	0.898 [0.82, 0.95]
MyConnectome	85	1.718 ± 1.118	518 ± 286 [55.188]	0.794 ± 0.088	0.969 [0.95, 0.99]
MyConnectome	86	-	-	-	-
MyConnectome	87	1.194 ± 1.400	2421 ± 1112 [45.955]	0.932 ± 0.054	0.974 [0.95, 0.99]
MyConnectome	88	2.617 ± 1.381	537 ± 264 [49.151]	0.722 ± 0.079	0.972 [0.95, 0.99]
MyConnectome	89	1.184 ± 0.695	3756 ± 1689 [44.967]	0.885 ± 0.059	0.658 [0.45, 0.83]
MyConnectome	90	2.558 ± 1.520	439 ± 257 [58.650]	0.644 ± 0.125	0.966 [0.94, 0.98]
MyConnectome	91	2.113 ± 1.610	1363 ± 631 [46.279]	0.805 ± 0.087	0.782 [0.59, 0.90]
MyConnectome	92	4.428 ± 1.951	1639 ± 1083 [66.102]	0.735 ± 0.098	0.590 [0.37, 0.78]
MyConnectome	93	1.092 ± 0.785	379 ± 134 [35.312]	0.748 ± 0.086	0.984 [0.97, 0.99]
MyConnectome	94	2.862 ± 1.644	1801 ± 1093 [60.724]	0.767 ± 0.120	0.529 [0.31, 0.74]
MyConnectome	95	1.079 ± 0.747	287 ± 153 [53.472]	0.781 ± 0.084	0.989 [0.98, 1.00]
MyConnectome	96	3.429 ± 1.995	304 ± 157 [51.708]	0.624 ± 0.112	0.963 [0.94, 0.98]
MyConnectome	97	2.503 ± 0.885	1204 ± 870 [72.264]	0.769 ± 0.117	0.750 [0.55, 0.88]
MyConnectome	98	1.070 ± 0.877	620 ± 401 [64.684]	0.791 ± 0.103	0.904 [0.82, 0.96]
MyConnectome	99	2.560 ± 1.594	2063 ± 1328 [64.341]	0.816 ± 0.121	0.896 [0.79, 0.95]
MyConnectome	100	1.974 ± 2.106	1218 ± 519 [42.580]	0.861 ± 0.069	0.891 [0.77, 0.95]
MyConnectome	101	4.074 ± 2.160	1003 ± 647 [64.501]	0.693 ± 0.133	0.325 [0.17, 0.54]
MyConnectome	102	2.490 ± 1.240	578 ± 322 [55.741]	0.696 ± 0.091	0.983 [0.97, 0.99]
MyConnectome	103	3.441 ± 1.824	274 ± 166 [60.779]	0.549 ± 0.116	0.913 [0.85, 0.96]
MyConnectome	104	3.845 ± 1.777	3667 ± 1885 [51.400]	0.839 ± 0.104	0.781 [0.57, 0.90]
MyConnectome	105	3.575 ± 1.529	628 ± 718 [114.310]	0.587 ± 0.157	0.275 [0.13, 0.49]
MyConnectome	106	1.811 ± 0.656	180 ± 90 [49.890]	0.559 ± 0.097	0.967 [0.94, 0.98]
MyConnectome	107	4.075 ± 1.849	2231 ± 1286 [57.660]	0.767 ± 0.130	0.795 [0.68, 0.90]
MyConnectome	108	1.176 ± 0.567	278 ± 170 [60.939]	0.748 ± 0.093	0.988 [0.98, 0.99]
MyConnectome	109	3.952 ± 1.019	235 ± 143 [61.046]	0.464 ± 0.108	0.944 [0.90, 0.97]
MyConnectome	110	1.676 ± 0.996	927 ± 546 [58.904]	0.824 ± 0.099	0.694 [0.48, 0.85]
MyConnectome	111	2.045 ± 1.235	753 ± 455 [60.415]	0.687 ± 0.123	0.467 [0.24, 0.69]
MyConnectome	112	1.071 ± 0.801	1512 ± 674 [44.573]	0.928 ± 0.038	0.985 [0.97, 0.99]
MyConnectome	113	3.638 ± 3.207	2326 ± 1476 [63.441]	0.775 ± 0.139	0.685 [0.47, 0.84]
MyConnectome	114	1.875 ± 1.519	1177 ± 600 [50.920]	0.812 ± 0.087	0.799 [0.61, 0.91]
MyConnectome	115	3.643 ± 3.736	801 ± 505 [62.996]	0.668 ± 0.138	0.653 [0.41, 0.83]
MyConnectome	116	1.434 ± 1.591	1459 ± 539 [36.968]	0.835 ± 0.075	0.680 [0.47, 0.84]
MyConnectome	117	1.294 ± 1.621	4870 ± 1651 [33.906]	0.913 ± 0.092	0.848 [0.68, 0.93]
MyConnectome	118	2.281 ± 1.112	2657 ± 781 [29.374]	0.873 ± 0.062	0.702 [0.53, 0.85]
MyConnectome	119	1.252 ± 1.037	666 ± 338 [50.694]	0.743 ± 0.119	0.820 [0.69, 0.91]
MyConnectome	120	1.404 ± 0.787	822 ± 577 [70.236]	0.837 ± 0.091	0.770 [0.59, 0.89]
MyConnectome	121	2.727 ± 1.752	319 ± 183 [57.300]	0.666 ± 0.093	0.964 [0.94, 0.98]
MyConnectome	122	2.093 ± 1.416	792 ± 437 [55.174]	0.790 ± 0.101	0.926 [0.85, 0.97]
MyConnectome	123	2.382 ± 1.794	1128 ± 699 [61.987]	0.732 ± 0.141	0.701 [0.49, 0.85]
MyConnectome	124	-	-	-	-
MyConnectome	125	1.499 ± 1.067	1692 ± 755 [44.616]	0.874 ± 0.068	0.899 [0.80, 0.96]
MyConnectome	126	1.476 ± 0.712	223 ± 168 [75.441]	0.682 ± 0.107	0.987 [0.98, 0.99]
MyConnectome	127	2.262 ± 1.010	581 ± 359 [61.887]	0.758 ± 0.120	0.634 [0.43, 0.81]
MyConnectome	128	1.449 ± 1.297	673 ± 215 [31.978]	0.782 ± 0.071	0.986 [0.97, 0.99]
MyConnectome	129	3.745 ± 1.363	248 ± 145 [58.423]	0.493 ± 0.120	0.897 [0.82, 0.95]
MyConnectome	130	1.497 ± 0.684	184 ± 107 [58.198]	0.699 ± 0.082	0.990 [0.98, 1.00]
MyConnectome	131	1.691 ± 1.156	1625 ± 806 [49.608]	0.897 ± 0.066	0.972 [0.95, 0.99]
MyConnectome	132	0.869 ± 0.870	1028 ± 399 [38.783]	0.867 ± 0.067	0.944 [0.88, 0.98]
MyConnectome	133	1.832 ± 1.280	176 ± 71 [40.075]	0.595 ± 0.101	0.942 [0.89, 0.97]
MyConnectome	134	1.617 ± 1.621	1407 ± 682 [48.450]	0.847 ± 0.105	0.857 [0.73, 0.93]
MyConnectome	135	2.287 ± 1.528	551 ± 354 [64.303]	0.664 ± 0.136	0.842 [0.71, 0.93]
MyConnectome	136	0.856 ± 0.673	1328 ± 569 [42.850]	0.906 ± 0.044	0.857 [0.73, 0.93]
MyConnectome	137	1.685 ± 0.999	1492 ± 581 [38.946]	0.888 ± 0.058	0.976 [0.95, 0.99]
MyConnectome	138	2.615 ± 1.090	449 ± 250 [55.668]	0.637 ± 0.131	0.895 [0.82, 0.95]
MyConnectome	139	1.573 ± 1.249	2140 ± 1244 [58.142]	0.798 ± 0.118	0.252 [0.11, 0.46]
MyConnectome	140	2.826 ± 1.393	224 ± 136 [60.792]	0.496 ± 0.122	0.985 [0.97, 0.99]
MyConnectome	141	0.800 ± 0.679	547 ± 200 [36.608]	0.889 ± 0.049	0.988 [0.98, 0.99]
MyConnectome	142	2.595 ± 2.406	1020 ± 559 [54.772]	0.736 ± 0.144	0.644 [0.42, 0.82]
MyConnectome	143	0.550 ± 0.244	1475 ± 144 [9.790]	0.815 ± 0.014	0.924 [0.87, 0.96]
MyConnectome	144	2.405 ± 1.243	810 ± 499 [61.677]	0.781 ± 0.081	0.575 [0.33, 0.78]
MyConnectome	145	2.525 ± 1.138	521 ± 222 [42.555]	0.690 ± 0.099	0.974 [0.96, 0.99]
MyConnectome	146	2.715 ± 1.589	257 ± 143 [55.596]	0.632 ± 0.101	0.894 [0.80, 0.95]
MyConnectome	147	1.565 ± 0.776	542 ± 313 [57.703]	0.643 ± 0.117	0.689 [0.49, 0.84]
MyConnectome	148	2.492 ± 1.780	1033 ± 682 [65.987]	0.750 ± 0.119	0.743 [0.56, 0.87]
MyConnectome	149	1.269 ± 0.651	535 ± 351 [65.708]	0.780 ± 0.100	0.961 [0.92, 0.98]
MyConnectome	150	2.715 ± 2.048	1214 ± 685 [56.424]	0.687 ± 0.129	0.592 [0.37, 0.79]
MyConnectome	151	1.437 ± 1.258	431 ± 145 [33.554]	0.654 ± 0.092	0.982 [0.97, 0.99]
MyConnectome	152	0.608 ± 0.325	913 ± 108 [11.808]	0.922 ± 0.008	0.946 [0.90, 0.98]
MyConnectome	153	1.550 ± 1.102	1025 ± 606 [59.168]	0.791 ± 0.151	0.811 [0.66, 0.91]
MyConnectome	154	1.966 ± 1.431	1349 ± 692 [51.308]	0.849 ± 0.088	0.854 [0.70, 0.94]
MyConnectome	155	3.919 ± 1.866	1103 ± 816 [74.012]	0.560 ± 0.164	0.307 [0.15, 0.53]
MyConnectome	156	1.695 ± 0.882	733 ± 484 [65.965]	0.752 ± 0.097	0.938 [0.89, 0.97]
MyConnectome	157	2.058 ± 1.492	1545 ± 824 [53.326]	0.828 ± 0.087	0.806 [0.63, 0.91]
MyConnectome	158	3.741 ± 2.785	2883 ± 1416 [49.132]	0.790 ± 0.114	0.508 [0.29, 0.72]
MyConnectome	159	1.832 ± 1.698	1537 ± 688 [44.744]	0.825 ± 0.104	0.830 [0.67, 0.92]
MyConnectome	160	1.650 ± 1.254	571 ± 304 [53.205]	0.718 ± 0.106	0.959 [0.91, 0.98]
MyConnectome	161	3.146 ± 1.794	409 ± 725 [177.438]	0.482 ± 0.155	0.166 [0.07, 0.33]
MyConnectome	162	1.318 ± 0.827	360 ± 159 [44.165]	0.788 ± 0.083	0.981 [0.96, 0.99]
MyConnectome	163	3.238 ± 1.936	504 ± 360 [71.445]	0.602 ± 0.155	0.323 [0.16, 0.55]
MyConnectome	164	1.319 ± 0.905	1413 ± 736 [52.066]	0.869 ± 0.068	0.600 [0.41, 0.78]
MyConnectome	165	1.696 ± 1.069	1013 ± 556 [54.902]	0.820 ± 0.094	0.864 [0.72, 0.94]
MyConnectome	166	2.714 ± 1.010	334 ± 212 [63.525]	0.628 ± 0.121	0.965 [0.94, 0.98]
MyConnectome	167	0.910 ± 0.687	991 ± 366 [36.970]	0.797 ± 0.102	0.964 [0.93, 0.98]
MyConnectome	168	2.080 ± 1.235	1369 ± 823 [60.144]	0.728 ± 0.154	0.612 [0.40, 0.79]
MyConnectome	169	0.842 ± 0.687	794 ± 293 [36.862]	0.846 ± 0.080	0.969 [0.94, 0.99]
MyConnectome	170	0.735 ± 0.599	1451 ± 503 [34.678]	0.910 ± 0.062	0.966 [0.93, 0.98]
MyConnectome	171	2.486 ± 1.149	507 ± 303 [59.741]	0.681 ± 0.102	0.948 [0.90, 0.98]
MyConnectome	172	1.867 ± 0.716	84 ± 25 [30.377]	0.370 ± 0.053	0.767 [0.64, 0.88]
MyConnectome	173	1.755 ± 1.358	1590 ± 476 [29.900]	0.862 ± 0.063	0.796 [0.61, 0.91]
MyConnectome	174	2.392 ± 1.779	741 ± 275 [37.136]	0.794 ± 0.057	0.989 [0.98, 0.99]
MyConnectome	175	1.560 ± 1.177	1040 ± 650 [62.502]	0.805 ± 0.087	0.849 [0.71, 0.93]
MyConnectome	176	0.972 ± 0.836	1059 ± 473 [44.663]	0.871 ± 0.073	0.936 [0.87, 0.97]
MyConnectome	177	1.130 ± 1.130	1104 ± 437 [39.604]	0.864 ± 0.079	0.950 [0.90, 0.98]
MyConnectome	178	0.968 ± 0.888	691 ± 275 [39.760]	0.801 ± 0.094	0.894 [0.79, 0.95]
MyConnectome	179	1.387 ± 1.217	2312 ± 1026 [44.390]	0.893 ± 0.089	0.958 [0.91, 0.98]
MyConnectome	180	2.171 ± 1.080	761 ± 560 [73.656]	0.692 ± 0.146	0.585 [0.36, 0.78]
MyConnectome	181	0.952 ± 0.724	1614 ± 746 [46.200]	0.910 ± 0.069	0.977 [0.95, 0.99]
MyConnectome	182	2.947 ± 1.724	1311 ± 724 [55.178]	0.749 ± 0.136	0.601 [0.37, 0.79]
MyConnectome	183	3.983 ± 2.229	408 ± 427 [104.652]	0.472 ± 0.113	0.239 [0.10, 0.45]
MyConnectome	184	1.255 ± 0.910	1910 ± 828 [43.344]	0.837 ± 0.091	0.673 [0.48, 0.83]
MyConnectome	185	1.492 ± 1.528	1088 ± 373 [34.247]	0.871 ± 0.066	0.966 [0.93, 0.99]
MyConnectome	186	1.734 ± 0.579	243 ± 169 [69.640]	0.686 ± 0.103	0.988 [0.98, 0.99]
MyConnectome	187	2.635 ± 2.025	926 ± 488 [52.705]	0.699 ± 0.115	0.425 [0.22, 0.65]
MyConnectome	188	4.084 ± 3.009	1273 ± 643 [50.516]	0.760 ± 0.112	0.782 [0.63, 0.89]
MyConnectome	189	3.402 ± 2.369	651 ± 368 [56.536]	0.564 ± 0.217	0.323 [0.16, 0.55]
MyConnectome	190	2.311 ± 1.281	279 ± 146 [52.395]	0.617 ± 0.096	0.977 [0.96, 0.99]
MyConnectome	191	2.175 ± 0.996	1498 ± 1044 [69.674]	0.833 ± 0.103	0.816 [0.65, 0.92]
MyConnectome	192	2.027 ± 2.000	647 ± 334 [51.584]	0.723 ± 0.137	0.647 [0.43, 0.82]
MyConnectome	193	3.236 ± 1.762	1418 ± 676 [47.679]	0.756 ± 0.120	0.878 [0.77, 0.94]
MyConnectome	194	2.176 ± 1.138	906 ± 583 [64.372]	0.812 ± 0.109	0.680 [0.52, 0.83]
MyConnectome	195	1.563 ± 1.333	1509 ± 691 [45.834]	0.887 ± 0.068	0.860 [0.71, 0.94]
MyConnectome	196	2.831 ± 2.127	2889 ± 1525 [52.784]	0.858 ± 0.082	0.824 [0.70, 0.92]
MyConnectome	197	1.564 ± 0.476	70 ± 17 [24.465]	0.398 ± 0.046	0.775 [0.66, 0.88]
MyConnectome	198	2.134 ± 1.493	1442 ± 754 [52.264]	0.762 ± 0.122	0.667 [0.44, 0.84]
MyConnectome	199	1.722 ± 1.355	1408 ± 720 [51.168]	0.849 ± 0.081	0.818 [0.65, 0.92]
MyConnectome	200	1.482 ± 0.986	1490 ± 840 [56.349]	0.818 ± 0.102	0.891 [0.78, 0.95]
MyConnectome	201	1.314 ± 0.954	1805 ± 774 [42.860]	0.873 ± 0.071	0.891 [0.79, 0.95]
MyConnectome	202	0.937 ± 0.601	319 ± 126 [39.602]	0.829 ± 0.063	0.980 [0.96, 0.99]
MyConnectome	203	2.434 ± 1.287	750 ± 532 [70.858]	0.680 ± 0.159	0.671 [0.44, 0.84]
MyConnectome	204	3.361 ± 2.912	2154 ± 1120 [51.992]	0.709 ± 0.174	0.364 [0.18, 0.59]
MyConnectome	205	2.497 ± 1.519	240 ± 101 [42.085]	0.529 ± 0.095	0.964 [0.94, 0.98]
MyConnectome	206	1.958 ± 0.999	571 ± 354 [61.920]	0.735 ± 0.100	0.567 [0.35, 0.77]
MyConnectome	207	0.962 ± 0.642	720 ± 349 [48.421]	0.863 ± 0.078	0.918 [0.83, 0.96]
MyConnectome	208	3.472 ± 1.436	452 ± 275 [60.752]	0.717 ± 0.093	0.918 [0.86, 0.96]
MyConnectome	209	3.205 ± 1.483	1111 ± 653 [58.811]	0.811 ± 0.075	0.767 [0.57, 0.89]
MyConnectome	210	3.709 ± 1.091	197 ± 93 [47.022]	0.546 ± 0.112	0.874 [0.79, 0.94]
MyConnectome	211	1.995 ± 1.647	734 ± 446 [60.830]	0.753 ± 0.110	0.704 [0.49, 0.86]
MyConnectome	212	1.874 ± 1.896	1461 ± 520 [35.593]	0.862 ± 0.098	0.845 [0.68, 0.93]
MyConnectome	213	1.726 ± 0.637	58 ± 23 [40.725]	0.330 ± 0.077	0.697 [0.55, 0.84]
MyConnectome	214	1.266 ± 0.808	548 ± 303 [55.296]	0.810 ± 0.106	0.767 [0.59, 0.89]
MyConnectome	215	5.925 ± 3.496	1783 ± 1135 [63.652]	0.632 ± 0.177	0.380 [0.20, 0.61]
MyConnectome	216	1.500 ± 1.401	1597 ± 704 [44.062]	0.868 ± 0.096	0.905 [0.79, 0.96]
MyConnectome	217	1.667 ± 1.311	938 ± 434 [46.245]	0.859 ± 0.059	0.912 [0.81, 0.96]
MyConnectome	218	1.075 ± 0.879	984 ± 599 [60.837]	0.861 ± 0.095	0.890 [0.78, 0.95]
MyConnectome	219	2.340 ± 2.068	1616 ± 979 [60.574]	0.733 ± 0.107	0.400 [0.20, 0.63]
MyConnectome	220	1.610 ± 0.722	401 ± 272 [67.895]	0.732 ± 0.129	0.955 [0.90, 0.98]
MyConnectome	221	1.418 ± 1.046	1839 ± 680 [36.993]	0.898 ± 0.048	0.817 [0.66, 0.92]
MyConnectome	222	1.124 ± 0.669	471 ± 168 [35.704]	0.758 ± 0.081	0.969 [0.94, 0.99]
MyConnectome	223	1.048 ± 0.655	371 ± 196 [52.823]	0.808 ± 0.079	0.991 [0.98, 1.00]
MyConnectome	224	1.044 ± 0.839	1738 ± 661 [38.024]	0.878 ± 0.079	0.934 [0.86, 0.97]
MyConnectome	225	2.784 ± 1.283	969 ± 596 [61.548]	0.764 ± 0.103	0.791 [0.62, 0.90]
MyConnectome	226	-	-	-	-
MyConnectome	227	1.369 ± 0.892	490 ± 159 [32.519]	0.728 ± 0.075	0.981 [0.96, 0.99]
MyConnectome	228	4.559 ± 1.887	327 ± 187 [57.147]	0.530 ± 0.116	0.944 [0.90, 0.97]
MyConnectome	229	2.266 ± 1.225	430 ± 272 [63.242]	0.766 ± 0.110	0.576 [0.36, 0.77]
MyConnectome	230	2.427 ± 0.761	277 ± 127 [45.921]	0.620 ± 0.081	0.965 [0.94, 0.98]
MyConnectome	231	2.231 ± 1.400	1333 ± 731 [54.858]	0.789 ± 0.095	0.705 [0.53, 0.85]
MyConnectome	232	1.160 ± 0.645	660 ± 376 [56.924]	0.830 ± 0.081	0.969 [0.93, 0.99]
MyConnectome	233	0.820 ± 0.749	1713 ± 386 [22.508]	0.854 ± 0.037	0.914 [0.82, 0.96]
MyConnectome	234	1.989 ± 1.421	942 ± 627 [66.598]	0.774 ± 0.112	0.747 [0.56, 0.88]
MyConnectome	235	1.210 ± 0.673	274 ± 89 [32.468]	0.658 ± 0.079	0.987 [0.98, 0.99]
MyConnectome	236	1.142 ± 0.705	505 ± 281 [55.557]	0.791 ± 0.132	0.689 [0.51, 0.84]
MyConnectome	237	2.402 ± 1.438	215 ± 74 [34.220]	0.615 ± 0.064	0.976 [0.96, 0.99]
MyConnectome	238	2.136 ± 1.109	839 ± 542 [64.616]	0.706 ± 0.105	0.484 [0.28, 0.70]
MyConnectome	239	2.073 ± 1.157	312 ± 140 [44.899]	0.571 ± 0.101	0.977 [0.96, 0.99]
MyConnectome	240	2.713 ± 3.956	1619 ± 370 [22.840]	0.786 ± 0.062	0.323 [0.16, 0.55]
MyConnectome	241	0.704 ± 0.763	1648 ± 321 [19.458]	0.907 ± 0.025	0.975 [0.95, 0.99]
MyConnectome	242	3.354 ± 1.962	1501 ± 689 [45.879]	0.844 ± 0.080	0.424 [0.24, 0.64]
MyConnectome	243	2.786 ± 1.272	259 ± 234 [90.442]	0.499 ± 0.127	0.972 [0.95, 0.99]
MyConnectome	244	3.279 ± 1.807	943 ± 492 [52.140]	0.751 ± 0.098	0.683 [0.46, 0.85]
MyConnectome	245	3.169 ± 1.548	1473 ± 913 [61.943]	0.763 ± 0.112	0.561 [0.33, 0.76]
MyConnectome	246	2.346 ± 1.868	1164 ± 545 [46.815]	0.736 ± 0.129	0.601 [0.39, 0.79]
MyConnectome	247	1.188 ± 1.342	913 ± 347 [38.019]	0.852 ± 0.086	0.825 [0.65, 0.92]
MyConnectome	248	3.416 ± 1.806	1798 ± 961 [53.458]	0.804 ± 0.070	0.524 [0.31, 0.74]
MyConnectome	249	1.665 ± 1.220	1727 ± 998 [57.795]	0.820 ± 0.086	0.665 [0.47, 0.83]
MyConnectome	250	3.368 ± 1.459	389 ± 270 [69.307]	0.509 ± 0.156	0.841 [0.69, 0.93]
MyConnectome	251	2.802 ± 2.215	2220 ± 1062 [47.833]	0.845 ± 0.087	0.906 [0.81, 0.96]
MyConnectome	252	2.344 ± 1.291	383 ± 312 [81.415]	0.608 ± 0.154	0.387 [0.20, 0.62]
MyConnectome	253	3.348 ± 1.489	466 ± 336 [72.169]	0.544 ± 0.165	0.731 [0.52, 0.87]
MyConnectome	254	1.692 ± 0.831	365 ± 273 [74.689]	0.740 ± 0.092	0.966 [0.94, 0.98]
MyConnectome	255	1.982 ± 1.066	184 ± 149 [81.231]	0.587 ± 0.175	0.759 [0.61, 0.88]
MyConnectome	256	1.676 ± 1.279	1752 ± 828 [47.246]	0.840 ± 0.054	0.757 [0.57, 0.88]
MyConnectome	257	0.924 ± 0.867	866 ± 321 [37.064]	0.834 ± 0.125	0.939 [0.87, 0.97]
MyConnectome	258	1.974 ± 1.164	417 ± 264 [63.388]	0.629 ± 0.155	0.819 [0.71, 0.91]
MyConnectome	259	2.139 ± 1.857	1479 ± 933 [63.081]	0.812 ± 0.123	0.904 [0.81, 0.96]
MyConnectome	260	1.380 ± 0.964	1740 ± 820 [47.132]	0.828 ± 0.091	0.398 [0.22, 0.62]
MyConnectome	261	2.735 ± 1.286	771 ± 548 [71.132]	0.754 ± 0.090	0.747 [0.54, 0.88]
MyConnectome	262	2.050 ± 0.859	253 ± 187 [73.776]	0.568 ± 0.119	0.945 [0.90, 0.97]
MyConnectome	263	1.521 ± 0.832	664 ± 399 [60.024]	0.831 ± 0.092	0.967 [0.94, 0.99]
MyConnectome	264	1.036 ± 0.582	343 ± 83 [24.278]	0.771 ± 0.035	0.959 [0.91, 0.98]
MyConnectome	265	3.481 ± 2.445	529 ± 338 [63.890]	0.580 ± 0.160	0.695 [0.48, 0.85]
MyConnectome	266	4.431 ± 3.439	1176 ± 414 [35.240]	0.719 ± 0.069	0.380 [0.19, 0.61]
MyConnectome	267	2.203 ± 1.530	502 ± 243 [48.460]	0.679 ± 0.107	0.972 [0.95, 0.99]
MyConnectome	268	3.601 ± 3.059	1380 ± 594 [43.013]	0.785 ± 0.082	0.281 [0.14, 0.49]
MyConnectome	269	2.375 ± 1.342	968 ± 566 [58.447]	0.734 ± 0.098	0.654 [0.42, 0.83]
MyConnectome	270	3.646 ± 2.391	966 ± 616 [63.730]	0.690 ± 0.114	0.630 [0.40, 0.81]
MyConnectome	271	1.465 ± 0.793	278 ± 111 [39.916]	0.656 ± 0.095	0.982 [0.97, 0.99]
MyConnectome	272	0.464 ± 0.414	1189 ± 287 [24.158]	0.927 ± 0.040	0.973 [0.94, 0.99]
MyConnectome	273	1.574 ± 1.056	741 ± 220 [29.667]	0.859 ± 0.036	0.865 [0.75, 0.94]
MyConnectome	274	1.170 ± 1.645	1248 ± 277 [22.187]	0.858 ± 0.046	0.975 [0.95, 0.99]
MyConnectome	275	2.128 ± 0.927	394 ± 301 [76.233]	0.652 ± 0.114	0.973 [0.95, 0.99]
MyConnectome	276	1.517 ± 1.449	2963 ± 961 [32.428]	0.930 ± 0.053	0.974 [0.94, 0.99]
MyConnectome	277	1.371 ± 1.099	1537 ± 487 [31.715]	0.891 ± 0.033	0.874 [0.76, 0.94]
MyConnectome	278	1.178 ± 0.912	1882 ± 782 [41.569]	0.872 ± 0.062	0.919 [0.85, 0.96]
MyConnectome	279	4.162 ± 1.953	1313 ± 907 [69.057]	0.730 ± 0.096	0.495 [0.28, 0.71]
MyConnectome	280	0.950 ± 0.875	2687 ± 877 [32.650]	0.939 ± 0.044	0.984 [0.97, 0.99]
MyConnectome	281	2.512 ± 1.301	772 ± 590 [76.452]	0.689 ± 0.151	0.428 [0.24, 0.65]
MyConnectome	282	2.881 ± 1.404	466 ± 359 [77.004]	0.634 ± 0.127	0.960 [0.93, 0.98]
MyConnectome	283	3.830 ± 3.219	1283 ± 670 [52.232]	0.733 ± 0.165	0.497 [0.27, 0.72]
MyConnectome	284	1.215 ± 0.804	561 ± 214 [38.104]	0.781 ± 0.117	0.986 [0.97, 0.99]
MyConnectome	285	1.023 ± 0.717	697 ± 278 [39.865]	0.870 ± 0.071	0.948 [0.89, 0.98]
MyConnectome	286	1.185 ± 0.746	727 ± 364 [50.033]	0.846 ± 0.065	0.865 [0.74, 0.94]
MyConnectome	287	1.929 ± 1.395	352 ± 160 [45.528]	0.602 ± 0.124	0.977 [0.96, 0.99]
MyConnectome	288	2.669 ± 1.401	392 ± 221 [56.294]	0.656 ± 0.091	0.940 [0.90, 0.97]
MyConnectome	289	0.606 ± 0.437	621 ± 153 [24.675]	0.900 ± 0.039	0.969 [0.94, 0.99]
MyConnectome	290	3.269 ± 2.366	1857 ± 1028 [55.358]	0.728 ± 0.187	0.342 [0.18, 0.56]
MyConnectome	291	2.499 ± 0.649	116 ± 60 [51.405]	0.549 ± 0.093	0.970 [0.95, 0.99]
MyConnectome	292	1.361 ± 0.755	314 ± 174 [55.203]	0.764 ± 0.091	0.992 [0.99, 1.00]
MyConnectome	293	2.133 ± 1.422	1733 ± 922 [53.206]	0.781 ± 0.156	0.381 [0.19, 0.61]
MyConnectome	294	1.431 ± 0.743	514 ± 337 [65.535]	0.789 ± 0.107	0.869 [0.75, 0.94]
MyConnectome	295	2.583 ± 1.584	635 ± 326 [51.366]	0.715 ± 0.090	0.976 [0.96, 0.99]
MyConnectome	296	1.394 ± 0.885	1004 ± 621 [61.807]	0.795 ± 0.110	0.789 [0.62, 0.90]
MyConnectome	297	1.653 ± 0.783	540 ± 361 [66.826]	0.823 ± 0.082	0.873 [0.78, 0.94]
MyConnectome	298	2.622 ± 2.582	2345 ± 1127 [48.062]	0.876 ± 0.075	0.588 [0.36, 0.78]
MyConnectome	299	2.217 ± 1.682	1744 ± 860 [49.293]	0.806 ± 0.110	0.802 [0.66, 0.90]
MyConnectome	300	2.282 ± 1.517	245 ± 116 [47.332]	0.582 ± 0.108	0.866 [0.78, 0.93]
MyConnectome	301	1.148 ± 0.859	258 ± 52 [20.080]	0.677 ± 0.043	0.988 [0.98, 0.99]
MyConnectome	302	0.568 ± 0.499	1515 ± 333 [21.984]	0.846 ± 0.051	0.957 [0.92, 0.98]
MyConnectome	303	1.104 ± 1.196	933 ± 331 [35.441]	0.821 ± 0.103	0.919 [0.81, 0.97]
MyConnectome	304	4.395 ± 5.090	722 ± 225 [31.131]	0.670 ± 0.093	0.239 [0.10, 0.45]
MyConnectome	305	1.127 ± 0.832	716 ± 464 [64.887]	0.753 ± 0.126	0.865 [0.73, 0.94]
MyConnectome	306	2.216 ± 1.940	1921 ± 872 [45.373]	0.828 ± 0.101	0.752 [0.55, 0.88]
MyConnectome	307	3.169 ± 1.891	387 ± 221 [57.211]	0.615 ± 0.099	0.941 [0.90, 0.97]
MyConnectome	308	1.232 ± 1.339	696 ± 268 [38.564]	0.785 ± 0.124	0.827 [0.70, 0.92]
MyConnectome	309	1.665 ± 0.601	321 ± 178 [55.422]	0.643 ± 0.113	0.986 [0.98, 0.99]
MyConnectome	310	3.201 ± 1.158	220 ± 123 [56.038]	0.566 ± 0.111	0.959 [0.93, 0.98]
MyConnectome	311	2.257 ± 2.088	895 ± 288 [32.134]	0.824 ± 0.063	0.852 [0.73, 0.93]
MyConnectome	312	0.601 ± 0.484	803 ± 234 [29.151]	0.877 ± 0.048	0.981 [0.97, 0.99]
MyConnectome	313	1.247 ± 0.607	269 ± 171 [63.605]	0.726 ± 0.124	0.987 [0.98, 0.99]
MyConnectome	314	1.187 ± 0.784	314 ± 126 [40.154]	0.780 ± 0.071	0.993 [0.99, 1.00]
MyConnectome	315	1.046 ± 0.955	1284 ± 355 [27.629]	0.817 ± 0.039	0.868 [0.74, 0.94]
MyConnectome	316	1.298 ± 1.304	1378 ± 609 [44.220]	0.851 ± 0.088	0.801 [0.62, 0.91]
MyConnectome	317	6.012 ± 3.248	1343 ± 912 [67.915]	0.613 ± 0.172	0.582 [0.37, 0.77]
MyConnectome	318	2.732 ± 1.933	272 ± 131 [48.022]	0.528 ± 0.106	0.980 [0.96, 0.99]
MyConnectome	319	1.557 ± 1.399	1672 ± 828 [49.508]	0.888 ± 0.080	0.964 [0.92, 0.98]
MyConnectome	320	1.936 ± 0.838	490 ± 340 [69.394]	0.677 ± 0.115	0.875 [0.76, 0.94]
MyConnectome	321	1.335 ± 1.012	401 ± 127 [31.696]	0.699 ± 0.083	0.975 [0.95, 0.99]
MyConnectome	322	0.853 ± 0.683	547 ± 239 [43.751]	0.794 ± 0.096	0.971 [0.94, 0.99]
MyConnectome	323	1.862 ± 1.690	3904 ± 1118 [28.633]	0.891 ± 0.040	0.603 [0.39, 0.79]
MyConnectome	324	2.182 ± 1.407	990 ± 384 [38.779]	0.802 ± 0.091	0.801 [0.63, 0.91]
MyConnectome	325	4.035 ± 1.785	434 ± 310 [71.342]	0.644 ± 0.101	0.969 [0.94, 0.99]
MyConnectome	326	1.345 ± 0.722	470 ± 281 [59.793]	0.796 ± 0.089	0.955 [0.91, 0.98]
MyConnectome	327	3.956 ± 2.402	3225 ± 1535 [47.609]	0.729 ± 0.158	0.710 [0.53, 0.85]
MyConnectome	328	2.389 ± 1.348	429 ± 306 [71.314]	0.577 ± 0.144	0.593 [0.37, 0.78]
MyConnectome	329	2.561 ± 1.071	247 ± 164 [66.347]	0.591 ± 0.090	0.976 [0.96, 0.99]
MyConnectome	330	3.167 ± 1.124	301 ± 228 [75.871]	0.529 ± 0.135	0.953 [0.92, 0.98]
MyConnectome	331	1.324 ± 0.996	1100 ± 604 [54.920]	0.878 ± 0.068	0.910 [0.81, 0.96]
MyConnectome	332	3.246 ± 1.882	1949 ± 1123 [57.636]	0.868 ± 0.079	0.946 [0.88, 0.98]
MyConnectome	333	1.671 ± 1.329	429 ± 116 [26.922]	0.700 ± 0.044	0.971 [0.95, 0.99]
MyConnectome	334	1.049 ± 0.621	200 ± 88 [43.840]	0.771 ± 0.081	0.982 [0.97, 0.99]
MyConnectome	335	0.983 ± 0.580	597 ± 299 [50.123]	0.888 ± 0.056	0.958 [0.91, 0.98]
MyConnectome	336	2.222 ± 0.578	87 ± 25 [28.398]	0.356 ± 0.052	0.582 [0.41, 0.76]
MyConnectome	337	1.216 ± 0.988	1009 ± 387 [38.326]	0.803 ± 0.108	0.946 [0.88, 0.98]
MyConnectome	338	1.643 ± 1.200	842 ± 512 [60.738]	0.778 ± 0.126	0.704 [0.50, 0.85]
MyConnectome	339	1.899 ± 1.458	243 ± 114 [46.839]	0.624 ± 0.107	0.984 [0.97, 0.99]
MyConnectome	340	0.915 ± 1.066	982 ± 247 [25.136]	0.826 ± 0.087	0.853 [0.71, 0.93]
MyConnectome	341	1.273 ± 0.977	1296 ± 525 [40.534]	0.786 ± 0.132	0.818 [0.68, 0.91]
MyConnectome	342	2.859 ± 1.576	320 ± 170 [53.199]	0.606 ± 0.113	0.983 [0.97, 0.99]
MyConnectome	343	1.051 ± 0.563	401 ± 149 [37.258]	0.788 ± 0.074	0.994 [0.99, 1.00]
MyConnectome	344	1.224 ± 1.101	1317 ± 237 [18.019]	0.861 ± 0.025	0.916 [0.83, 0.96]
MyConnectome	345	4.747 ± 2.184	1042 ± 696 [66.788]	0.707 ± 0.131	0.626 [0.43, 0.80]
MyConnectome	346	2.554 ± 2.094	727 ± 293 [40.273]	0.721 ± 0.104	0.970 [0.95, 0.99]
MyConnectome	347	0.918 ± 0.874	793 ± 334 [42.081]	0.854 ± 0.078	0.853 [0.71, 0.93]
MyConnectome	348	1.590 ± 1.130	683 ± 409 [59.887]	0.784 ± 0.088	0.806 [0.65, 0.91]
MyConnectome	349	1.570 ± 1.537	1125 ± 498 [44.276]	0.813 ± 0.111	0.640 [0.42, 0.82]
MyConnectome	350	1.859 ± 1.004	236 ± 51 [21.639]	0.539 ± 0.046	0.666 [0.46, 0.83]
MyConnectome	351	2.380 ± 1.163	1812 ± 967 [53.401]	0.738 ± 0.118	0.564 [0.37, 0.76]
MyConnectome	352	1.380 ± 0.760	244 ± 134 [55.006]	0.754 ± 0.095	0.981 [0.96, 0.99]
MyConnectome	353	4.531 ± 3.353	530 ± 248 [46.779]	0.647 ± 0.146	0.670 [0.43, 0.84]
MyConnectome	354	1.066 ± 0.861	1337 ± 245 [18.326]	0.854 ± 0.022	0.952 [0.90, 0.98]
MyConnectome	355	1.285 ± 1.137	494 ± 192 [38.853]	0.740 ± 0.097	0.922 [0.84, 0.97]
MyConnectome	356	2.242 ± 1.376	2468 ± 1178 [47.718]	0.879 ± 0.091	0.814 [0.63, 0.92]
MyConnectome	357	1.561 ± 1.020	273 ± 128 [47.035]	0.637 ± 0.096	0.885 [0.78, 0.95]
MyConnectome	358	1.698 ± 1.892	1270 ± 476 [37.445]	0.802 ± 0.099	0.825 [0.65, 0.92]
MyConnectome	359	3.776 ± 2.706	596 ± 349 [58.604]	0.676 ± 0.149	0.672 [0.46, 0.84]
MyConnectome	360	1.969 ± 1.286	742 ± 422 [56.933]	0.746 ± 0.112	0.746 [0.54, 0.88]
MyConnectome	361	0.741 ± 0.449	270 ± 153 [56.777]	0.815 ± 0.086	0.977 [0.96, 0.99]
MyConnectome	362	2.147 ± 1.389	637 ± 373 [58.629]	0.741 ± 0.133	0.788 [0.59, 0.90]
MyConnectome	363	1.039 ± 0.822	1004 ± 380 [37.853]	0.869 ± 0.052	0.853 [0.71, 0.94]
MyConnectome	364	2.133 ± 1.297	255 ± 89 [34.720]	0.633 ± 0.090	0.983 [0.97, 0.99]
MyConnectome	365	2.488 ± 1.596	887 ± 534 [60.206]	0.734 ± 0.163	0.664 [0.45, 0.83]
MyConnectome	366	2.675 ± 1.734	243 ± 128 [52.766]	0.584 ± 0.110	0.887 [0.81, 0.94]
MyConnectome	367	2.795 ± 2.366	1750 ± 779 [44.511]	0.799 ± 0.090	0.720 [0.56, 0.86]
MyConnectome	368	0.716 ± 0.842	1126 ± 216 [19.171]	0.850 ± 0.048	0.935 [0.86, 0.97]
MyConnectome	369	3.219 ± 1.026	68 ± 33 [48.318]	0.327 ± 0.074	0.945 [0.91, 0.97]
MyConnectome	370	1.893 ± 0.581	139 ± 99 [71.199]	0.546 ± 0.103	0.980 [0.96, 0.99]
MyConnectome	371	3.654 ± 1.670	386 ± 286 [73.990]	0.584 ± 0.140	0.944 [0.90, 0.97]
MyConnectome	372	2.103 ± 1.447	711 ± 335 [47.067]	0.744 ± 0.099	0.684 [0.49, 0.84]
MyConnectome	373	2.428 ± 1.561	824 ± 562 [68.185]	0.718 ± 0.138	0.944 [0.90, 0.97]
MyConnectome	374	0.931 ± 0.661	707 ± 325 [46.002]	0.833 ± 0.115	0.908 [0.82, 0.96]
MyConnectome	375	1.308 ± 1.703	926 ± 393 [42.471]	0.813 ± 0.105	0.889 [0.76, 0.95]
MyConnectome	376	0.768 ± 0.688	1243 ± 436 [35.089]	0.895 ± 0.070	0.945 [0.88, 0.98]
MyConnectome	377	1.374 ± 1.616	2555 ± 648 [25.376]	0.902 ± 0.065	0.981 [0.96, 0.99]
MyConnectome	378	1.957 ± 1.622	1691 ± 893 [52.793]	0.813 ± 0.119	0.705 [0.50, 0.86]
MyConnectome	379	0.973 ± 0.842	1129 ± 169 [14.940]	0.905 ± 0.012	0.900 [0.80, 0.96]
MyConnectome	380	1.210 ± 0.600	226 ± 139 [61.452]	0.707 ± 0.097	0.968 [0.93, 0.99]
MyConnectome	381	1.974 ± 1.541	343 ± 64 [18.629]	0.675 ± 0.045	0.981 [0.97, 0.99]
MyConnectome	382	0.928 ± 0.955	2551 ± 894 [35.046]	0.938 ± 0.044	0.946 [0.88, 0.98]
MyConnectome	383	1.254 ± 1.090	1228 ± 596 [48.491]	0.821 ± 0.118	0.567 [0.35, 0.77]
MyConnectome	384	1.749 ± 0.927	433 ± 262 [60.482]	0.685 ± 0.133	0.876 [0.76, 0.94]
MyConnectome	385	1.793 ± 1.170	1067 ± 583 [54.590]	0.795 ± 0.101	0.273 [0.14, 0.48]
MyConnectome	386	0.937 ± 0.683	420 ± 141 [33.625]	0.756 ± 0.079	0.979 [0.96, 0.99]
MyConnectome	387	1.147 ± 1.010	996 ± 338 [33.981]	0.876 ± 0.057	0.940 [0.88, 0.97]
MyConnectome	388	2.159 ± 1.636	1981 ± 1068 [53.893]	0.848 ± 0.099	0.839 [0.69, 0.93]
MyConnectome	389	3.726 ± 3.437	1659 ± 830 [50.025]	0.793 ± 0.131	0.819 [0.64, 0.92]
MyConnectome	390	1.474 ± 1.250	218 ± 72 [33.172]	0.599 ± 0.096	0.983 [0.97, 0.99]
MyConnectome	391	2.098 ± 1.043	1396 ± 940 [67.335]	0.720 ± 0.147	0.233 [0.10, 0.44]
MyConnectome	392	1.436 ± 0.901	1019 ± 577 [56.592]	0.740 ± 0.122	0.534 [0.36, 0.73]
MyConnectome	393	3.863 ± 2.275	306 ± 172 [56.329]	0.527 ± 0.119	0.968 [0.94, 0.99]
MyConnectome	394	1.275 ± 1.017	514 ± 94 [18.334]	0.756 ± 0.033	0.985 [0.97, 0.99]
MyConnectome	395	2.214 ± 1.377	228 ± 79 [34.811]	0.552 ± 0.080	0.966 [0.94, 0.98]
MyConnectome	396	-	-	-	-
MyConnectome	397	3.641 ± 2.582	343 ± 174 [50.664]	0.580 ± 0.124	0.939 [0.89, 0.97]
MyConnectome	398	1.450 ± 1.603	820 ± 256 [31.213]	0.785 ± 0.068	0.868 [0.72, 0.94]
MyConnectome	399	1.327 ± 0.949	1588 ± 851 [53.591]	0.832 ± 0.087	0.751 [0.59, 0.88]
MyConnectome	400	1.118 ± 0.871	298 ± 89 [29.969]	0.737 ± 0.104	0.988 [0.98, 0.99]
MyConnectome	401	1.968 ± 1.518	1129 ± 635 [56.242]	0.775 ± 0.122	0.941 [0.87, 0.97]
MyConnectome	402	1.895 ± 0.817	106 ± 60 [56.596]	0.561 ± 0.083	0.974 [0.95, 0.99]
MyConnectome	403	1.178 ± 1.049	587 ± 123 [20.930]	0.797 ± 0.039	0.978 [0.96, 0.99]
MyConnectome	404	3.739 ± 2.361	4164 ± 2049 [49.202]	0.860 ± 0.084	0.334 [0.18, 0.55]
MyConnectome	405	1.562 ± 0.897	807 ± 551 [68.271]	0.762 ± 0.113	0.941 [0.88, 0.97]
MyConnectome	406	2.401 ± 1.030	165 ± 70 [42.510]	0.433 ± 0.083	0.964 [0.94, 0.98]
MyConnectome	407	4.465 ± 2.170	939 ± 630 [67.033]	0.693 ± 0.136	0.564 [0.33, 0.77]
MyConnectome	408	2.325 ± 0.869	90 ± 54 [59.365]	0.472 ± 0.118	0.963 [0.94, 0.98]
MyConnectome	409	1.779 ± 1.783	3150 ± 1118 [35.496]	0.896 ± 0.057	0.876 [0.74, 0.95]
MyConnectome	410	3.018 ± 2.368	561 ± 267 [47.668]	0.736 ± 0.083	0.899 [0.78, 0.96]
MyConnectome	411	2.059 ± 0.896	221 ± 164 [73.970]	0.594 ± 0.122	0.962 [0.93, 0.98]
MyConnectome	412	0.658 ± 0.928	1686 ± 333 [19.728]	0.926 ± 0.046	0.990 [0.98, 1.00]
MyConnectome	413	3.550 ± 2.148	1764 ± 1163 [65.933]	0.762 ± 0.151	0.623 [0.40, 0.81]
MyConnectome	414	1.328 ± 0.851	1338 ± 735 [54.931]	0.805 ± 0.114	0.806 [0.66, 0.91]
MyConnectome	415	1.892 ± 1.102	1066 ± 651 [61.001]	0.763 ± 0.110	0.834 [0.67, 0.93]
MyConnectome	416	1.557 ± 1.432	731 ± 315 [43.045]	0.763 ± 0.113	0.825 [0.66, 0.92]
MyConnectome	417	2.987 ± 1.587	1473 ± 852 [57.821]	0.764 ± 0.122	0.857 [0.72, 0.94]
MyConnectome	418	0.856 ± 0.613	209 ± 116 [55.805]	0.796 ± 0.087	0.986 [0.97, 0.99]
MyConnectome	419	1.666 ± 1.314	906 ± 488 [53.848]	0.773 ± 0.128	0.924 [0.85, 0.97]
MyConnectome	420	3.094 ± 1.386	382 ± 176 [46.121]	0.665 ± 0.070	0.396 [0.20, 0.63]
MyConnectome	421	1.635 ± 1.383	327 ± 100 [30.640]	0.635 ± 0.093	0.977 [0.96, 0.99]
MyConnectome	422	1.128 ± 0.819	1231 ± 614 [49.863]	0.796 ± 0.113	0.613 [0.39, 0.80]
MyConnectome	423	3.941 ± 2.296	743 ± 423 [56.869]	0.614 ± 0.134	0.347 [0.17, 0.58]
MyConnectome	424	0.952 ± 1.198	710 ± 198 [27.877]	0.850 ± 0.074	0.892 [0.78, 0.95]
MyConnectome	425	2.093 ± 1.360	512 ± 319 [62.343]	0.733 ± 0.121	0.902 [0.81, 0.96]
MyConnectome	426	2.153 ± 1.425	1033 ± 660 [63.853]	0.711 ± 0.142	0.624 [0.41, 0.81]
MyConnectome	427	3.205 ± 2.918	1597 ± 753 [47.161]	0.694 ± 0.128	0.354 [0.17, 0.58]
MyConnectome	428	1.146 ± 1.001	705 ± 279 [39.515]	0.852 ± 0.073	0.959 [0.91, 0.98]
MyConnectome	429	2.914 ± 1.880	1064 ± 690 [64.818]	0.743 ± 0.148	0.649 [0.41, 0.83]
MyConnectome	430	2.778 ± 1.544	195 ± 139 [71.398]	0.574 ± 0.134	0.955 [0.92, 0.98]
MyConnectome	431	1.352 ± 0.735	101 ± 42 [41.951]	0.509 ± 0.119	0.940 [0.89, 0.97]
MyConnectome	432	1.196 ± 1.178	1029 ± 501 [48.662]	0.849 ± 0.118	0.940 [0.87, 0.97]
MyConnectome	433	0.762 ± 0.732	1233 ± 189 [15.302]	0.894 ± 0.021	0.922 [0.83, 0.97]
MyConnectome	434	1.357 ± 1.203	321 ± 79 [24.560]	0.831 ± 0.036	0.987 [0.98, 0.99]
MyConnectome	435	0.801 ± 0.628	633 ± 224 [35.388]	0.780 ± 0.086	0.975 [0.95, 0.99]
MyConnectome	436	1.748 ± 1.451	3505 ± 1494 [42.632]	0.864 ± 0.076	0.426 [0.25, 0.64]
MyConnectome	437	1.875 ± 1.113	305 ± 146 [47.865]	0.668 ± 0.112	0.970 [0.94, 0.99]
MyConnectome	438	1.800 ± 1.242	1587 ± 844 [53.158]	0.821 ± 0.122	0.822 [0.66, 0.92]
MyConnectome	439	2.443 ± 3.356	1010 ± 263 [25.998]	0.778 ± 0.101	0.401 [0.21, 0.63]
MyConnectome	440	1.236 ± 0.932	338 ± 138 [40.920]	0.771 ± 0.083	0.743 [0.56, 0.88]
MyConnectome	441	2.812 ± 1.114	146 ± 66 [45.098]	0.517 ± 0.093	0.952 [0.91, 0.98]
MyConnectome	442	2.813 ± 1.134	354 ± 248 [70.265]	0.664 ± 0.140	0.692 [0.47, 0.85]
MyConnectome	443	1.531 ± 1.098	962 ± 547 [56.861]	0.740 ± 0.125	0.430 [0.25, 0.65]
MyConnectome	444	3.728 ± 2.423	1077 ± 597 [55.383]	0.676 ± 0.148	0.546 [0.31, 0.76]
MyConnectome	445	0.774 ± 0.846	1012 ± 385 [38.070]	0.862 ± 0.098	0.963 [0.92, 0.98]
MyConnectome	446	2.814 ± 1.683	1242 ± 814 [65.549]	0.765 ± 0.100	0.867 [0.74, 0.94]
MyConnectome	447	2.511 ± 1.185	261 ± 176 [67.369]	0.587 ± 0.111	0.958 [0.92, 0.98]
MyConnectome	448	2.849 ± 2.554	1491 ± 706 [47.369]	0.835 ± 0.105	0.552 [0.32, 0.76]
MyConnectome	449	0.832 ± 0.782	1141 ± 382 [33.456]	0.861 ± 0.091	0.948 [0.88, 0.98]
MyConnectome	450	6.317 ± 1.927	634 ± 443 [69.886]	0.592 ± 0.145	0.403 [0.20, 0.63]
MyConnectome	451	1.201 ± 0.693	315 ± 46 [14.604]	0.781 ± 0.018	0.985 [0.97, 0.99]
MyConnectome	452	0.860 ± 0.580	1811 ± 489 [26.997]	0.888 ± 0.056	0.925 [0.84, 0.97]
MyConnectome	453	2.243 ± 1.657	576 ± 294 [51.062]	0.756 ± 0.073	0.987 [0.98, 0.99]
MyConnectome	454	4.211 ± 2.044	939 ± 486 [51.743]	0.787 ± 0.084	0.895 [0.82, 0.95]
MyConnectome	455	1.565 ± 1.347	558 ± 272 [48.700]	0.749 ± 0.104	0.944 [0.88, 0.98]
MyConnectome	456	0.486 ± 0.391	1860 ± 381 [20.515]	0.924 ± 0.021	0.978 [0.95, 0.99]
MyConnectome	457	1.482 ± 1.353	1329 ± 622 [46.837]	0.868 ± 0.096	0.859 [0.71, 0.94]
MyConnectome	458	5.457 ± 2.118	998 ± 582 [58.312]	0.771 ± 0.095	0.438 [0.23, 0.67]
MyConnectome	459	1.246 ± 1.196	803 ± 322 [40.095]	0.810 ± 0.179	0.885 [0.75, 0.95]
MyConnectome	460	0.947 ± 0.894	758 ± 314 [41.369]	0.800 ± 0.099	0.964 [0.93, 0.98]
MyConnectome	461	1.512 ± 1.461	304 ± 65 [21.524]	0.701 ± 0.057	0.988 [0.98, 0.99]
MyConnectome	462	5.683 ± 3.141	112 ± 102 [91.654]	0.339 ± 0.136	0.868 [0.78, 0.94]
MyConnectome	463	3.352 ± 1.337	338 ± 181 [53.640]	0.571 ± 0.132	0.929 [0.88, 0.97]
MyConnectome	464	1.197 ± 1.015	895 ± 408 [45.605]	0.801 ± 0.130	0.878 [0.76, 0.95]
MyConnectome	465	2.255 ± 1.071	196 ± 100 [50.907]	0.560 ± 0.106	0.937 [0.89, 0.97]
MyConnectome	466	1.843 ± 0.730	171 ± 77 [44.826]	0.583 ± 0.100	0.970 [0.94, 0.99]
MyConnectome	467	2.725 ± 1.402	1423 ± 1167 [82.047]	0.753 ± 0.140	0.699 [0.52, 0.85]
MyConnectome	468	4.484 ± 1.447	343 ± 224 [65.319]	0.582 ± 0.160	0.753 [0.57, 0.88]
MyConnectome	469	1.041 ± 0.675	578 ± 208 [35.938]	0.790 ± 0.071	0.849 [0.71, 0.93]
MyConnectome	470	3.009 ± 2.823	802 ± 332 [41.399]	0.731 ± 0.097	0.694 [0.48, 0.85]
MyConnectome	471	0.905 ± 0.885	768 ± 226 [29.481]	0.774 ± 0.092	0.962 [0.92, 0.98]
MyConnectome	472	0.788 ± 0.799	1746 ± 800 [45.843]	0.924 ± 0.058	0.988 [0.98, 0.99]
MyConnectome	473	0.600 ± 0.300	619 ± 176 [28.353]	0.826 ± 0.065	0.982 [0.97, 0.99]
MyConnectome	474	1.828 ± 1.272	565 ± 298 [52.792]	0.708 ± 0.105	0.865 [0.75, 0.94]
MyConnectome	475	1.103 ± 0.633	208 ± 39 [18.594]	0.717 ± 0.035	0.990 [0.98, 1.00]
MyConnectome	476	4.116 ± 1.697	407 ± 269 [66.037]	0.600 ± 0.143	0.743 [0.54, 0.88]
MyConnectome	477	1.606 ± 1.214	239 ± 42 [17.688]	0.672 ± 0.041	0.986 [0.98, 0.99]
MyConnectome	478	2.873 ± 1.673	1922 ± 1143 [59.451]	0.753 ± 0.113	0.360 [0.18, 0.59]
MyConnectome	479	2.563 ± 1.048	359 ± 191 [53.260]	0.566 ± 0.120	0.947 [0.91, 0.97]
MyConnectome	480	1.346 ± 1.103	1907 ± 1004 [52.665]	0.838 ± 0.123	0.861 [0.72, 0.94]
MyConnectome	481	3.854 ± 3.569	822 ± 311 [37.762]	0.738 ± 0.101	0.726 [0.50, 0.87]
MyConnectome	482	2.570 ± 1.249	162 ± 71 [43.557]	0.495 ± 0.112	0.529 [0.35, 0.72]
MyConnectome	483	1.095 ± 1.136	1006 ± 366 [36.372]	0.851 ± 0.083	0.905 [0.80, 0.96]
MyConnectome	484	1.626 ± 0.733	96 ± 38 [39.458]	0.608 ± 0.090	0.895 [0.83, 0.95]
MyConnectome	485	1.064 ± 0.649	335 ± 240 [71.516]	0.702 ± 0.135	0.892 [0.82, 0.95]
MyConnectome	486	3.220 ± 1.675	294 ± 148 [50.407]	0.585 ± 0.098	0.913 [0.84, 0.96]
MyConnectome	487	3.789 ± 2.254	169 ± 86 [50.587]	0.472 ± 0.129	0.330 [0.16, 0.56]
MyConnectome	488	-	-	-	-
MyConnectome	489	1.768 ± 0.623	142 ± 99 [69.600]	0.611 ± 0.102	0.982 [0.97, 0.99]
MyConnectome	490	1.691 ± 0.825	308 ± 197 [63.837]	0.728 ± 0.104	0.813 [0.66, 0.91]
MyConnectome	491	1.055 ± 1.000	1155 ± 507 [43.878]	0.874 ± 0.075	0.972 [0.94, 0.99]
MyConnectome	492	1.826 ± 1.085	420 ± 327 [77.760]	0.670 ± 0.140	0.898 [0.82, 0.95]
MyConnectome	493	1.581 ± 0.986	757 ± 454 [59.962]	0.783 ± 0.106	0.898 [0.79, 0.96]
MyConnectome	494	2.371 ± 0.973	102 ± 39 [37.953]	0.478 ± 0.086	0.950 [0.91, 0.98]
MyConnectome	495	3.611 ± 1.440	335 ± 210 [62.739]	0.535 ± 0.122	0.942 [0.90, 0.97]
MyConnectome	496	2.498 ± 2.435	1859 ± 998 [53.702]	0.800 ± 0.122	0.900 [0.79, 0.96]
MyConnectome	497	2.159 ± 1.483	374 ± 258 [68.877]	0.572 ± 0.161	0.832 [0.73, 0.92]
MyConnectome	498	0.802 ± 1.163	2937 ± 813 [27.665]	0.911 ± 0.120	0.727 [0.50, 0.87]
MyConnectome	499	1.754 ± 1.250	873 ± 476 [54.502]	0.737 ± 0.143	0.897 [0.82, 0.95]
MyConnectome	500	4.228 ± 1.916	1131 ± 868 [76.737]	0.603 ± 0.140	0.469 [0.27, 0.68]
MyConnectome	501	1.620 ± 0.932	264 ± 131 [49.623]	0.712 ± 0.115	0.962 [0.93, 0.98]
MyConnectome	502	4.402 ± 2.129	514 ± 215 [41.764]	0.678 ± 0.078	0.892 [0.80, 0.95]
MyConnectome	503	1.997 ± 1.438	1019 ± 472 [46.284]	0.785 ± 0.135	0.821 [0.64, 0.92]
MyConnectome	504	1.695 ± 1.157	749 ± 494 [65.951]	0.821 ± 0.111	0.947 [0.89, 0.98]
MyConnectome	505	0.749 ± 0.496	1075 ± 244 [22.695]	0.801 ± 0.036	0.892 [0.77, 0.95]
MyConnectome	506	1.149 ± 1.550	1688 ± 389 [23.018]	0.903 ± 0.055	0.920 [0.82, 0.97]
MyConnectome	507	1.217 ± 1.015	1682 ± 755 [44.890]	0.834 ± 0.129	0.843 [0.68, 0.93]
MyConnectome	508	0.876 ± 1.248	1016 ± 292 [28.742]	0.882 ± 0.097	0.955 [0.91, 0.98]
MyConnectome	509	2.052 ± 1.089	385 ± 196 [51.045]	0.657 ± 0.131	0.678 [0.47, 0.84]
MyConnectome	510	3.476 ± 2.349	297 ± 157 [52.744]	0.652 ± 0.091	0.940 [0.90, 0.97]
MyConnectome	511	2.821 ± 1.224	401 ± 229 [57.176]	0.707 ± 0.099	0.960 [0.93, 0.98]
MyConnectome	512	3.495 ± 2.011	1026 ± 625 [60.904]	0.647 ± 0.151	0.468 [0.25, 0.69]
MyConnectome	513	3.208 ± 2.348	551 ± 252 [45.782]	0.721 ± 0.094	0.923 [0.84, 0.97]
MyConnectome	514	2.536 ± 1.945	2092 ± 1058 [50.560]	0.775 ± 0.112	0.055 [0.02, 0.13]
MyConnectome	515	1.263 ± 0.873	658 ± 393 [59.743]	0.796 ± 0.094	0.840 [0.69, 0.93]
MyConnectome	516	0.769 ± 0.642	1297 ± 469 [36.142]	0.848 ± 0.077	0.955 [0.90, 0.98]
MyConnectome	517	2.176 ± 1.467	1038 ± 446 [42.980]	0.761 ± 0.115	0.915 [0.83, 0.96]
MyConnectome	518	0.917 ± 0.802	978 ± 280 [28.653]	0.865 ± 0.075	0.959 [0.92, 0.98]
MyConnectome	519	1.534 ± 0.639	503 ± 313 [62.202]	0.824 ± 0.088	0.949 [0.89, 0.98]
MyConnectome	520	1.172 ± 1.042	863 ± 434 [50.286]	0.812 ± 0.124	0.856 [0.74, 0.93]
MyConnectome	521	1.826 ± 1.141	1308 ± 602 [46.039]	0.850 ± 0.124	0.938 [0.86, 0.97]
MyConnectome	522	1.532 ± 1.073	819 ± 459 [56.113]	0.727 ± 0.112	0.526 [0.34, 0.73]
MyConnectome	523	2.447 ± 2.167	2088 ± 1332 [63.783]	0.794 ± 0.137	0.811 [0.64, 0.91]
MyConnectome	524	5.264 ± 2.188	987 ± 724 [73.374]	0.672 ± 0.131	0.640 [0.43, 0.81]
MyConnectome	525	2.261 ± 1.283	280 ± 126 [44.889]	0.588 ± 0.094	0.966 [0.94, 0.98]
MyConnectome	526	1.936 ± 1.232	1082 ± 656 [60.619]	0.733 ± 0.175	0.817 [0.64, 0.92]
MyConnectome	527	2.861 ± 1.661	521 ± 630 [121.089]	0.622 ± 0.134	0.427 [0.23, 0.65]
MyConnectome	528	1.418 ± 0.661	208 ± 80 [38.491]	0.599 ± 0.101	0.975 [0.96, 0.99]
MyConnectome	529	2.735 ± 2.046	634 ± 270 [42.607]	0.737 ± 0.128	0.911 [0.83, 0.96]
MyConnectome	530	0.672 ± 1.043	2954 ± 426 [14.409]	0.927 ± 0.026	0.990 [0.98, 1.00]
MyConnectome	531	1.593 ± 1.350	1716 ± 572 [33.346]	0.868 ± 0.084	0.722 [0.50, 0.87]
MyConnectome	532	1.575 ± 1.814	1782 ± 786 [44.127]	0.859 ± 0.082	0.857 [0.76, 0.93]
MyConnectome	533	0.570 ± 0.271	814 ± 173 [21.275]	0.839 ± 0.030	0.896 [0.82, 0.95]
MyConnectome	534	1.579 ± 0.861	286 ± 172 [60.023]	0.580 ± 0.131	0.929 [0.86, 0.97]
MyConnectome	535	3.093 ± 2.428	1156 ± 570 [49.298]	0.741 ± 0.120	0.414 [0.22, 0.64]
MyConnectome	536	2.035 ± 1.438	4803 ± 1925 [40.084]	0.851 ± 0.075	0.463 [0.26, 0.68]
MyConnectome	537	2.408 ± 0.837	406 ± 206 [50.818]	0.660 ± 0.072	0.930 [0.88, 0.97]
MyConnectome	538	2.056 ± 1.060	589 ± 362 [61.402]	0.715 ± 0.134	0.820 [0.67, 0.92]
MyConnectome	539	2.577 ± 1.127	521 ± 302 [58.043]	0.650 ± 0.165	0.950 [0.91, 0.98]
MyConnectome	540	1.574 ± 0.837	124 ± 60 [48.290]	0.614 ± 0.104	0.954 [0.91, 0.98]
MyConnectome	541	1.782 ± 1.051	457 ± 284 [62.235]	0.706 ± 0.111	0.948 [0.90, 0.98]
MyConnectome	542	0.643 ± 0.683	714 ± 233 [32.595]	0.880 ± 0.056	0.978 [0.95, 0.99]
MyConnectome	543	1.291 ± 0.691	353 ± 123 [34.839]	0.710 ± 0.073	0.930 [0.85, 0.97]
MyConnectome	544	2.979 ± 1.919	883 ± 514 [58.146]	0.707 ± 0.124	0.791 [0.61, 0.90]
MyConnectome	545	2.592 ± 1.430	258 ± 122 [47.499]	0.650 ± 0.091	0.966 [0.94, 0.98]
MyConnectome	546	1.699 ± 0.725	416 ± 72 [17.274]	0.730 ± 0.037	0.964 [0.92, 0.98]
MyConnectome	547	2.045 ± 1.694	1742 ± 839 [48.143]	0.821 ± 0.112	0.467 [0.26, 0.69]
MyConnectome	548	1.040 ± 0.836	364 ± 151 [41.540]	0.764 ± 0.090	0.974 [0.95, 0.99]
MyConnectome	549	2.964 ± 1.522	550 ± 335 [60.867]	0.690 ± 0.142	0.775 [0.58, 0.90]
MyConnectome	550	1.813 ± 1.500	1353 ± 490 [36.214]	0.796 ± 0.079	0.569 [0.35, 0.77]
MyConnectome	551	2.811 ± 1.694	392 ± 204 [52.092]	0.562 ± 0.138	0.870 [0.79, 0.94]
MyConnectome	552	2.126 ± 1.212	1085 ± 643 [59.264]	0.815 ± 0.099	0.793 [0.61, 0.90]
MyConnectome	553	1.903 ± 1.943	282 ± 56 [19.770]	0.674 ± 0.042	0.984 [0.97, 0.99]
MyConnectome	554	1.730 ± 1.617	1024 ± 534 [52.202]	0.816 ± 0.114	0.904 [0.81, 0.96]
MyConnectome	555	2.813 ± 2.470	1367 ± 660 [48.302]	0.709 ± 0.162	0.649 [0.42, 0.83]
MyConnectome	556	0.933 ± 0.655	669 ± 227 [33.889]	0.847 ± 0.090	0.983 [0.97, 0.99]
MyConnectome	557	2.665 ± 1.790	210 ± 79 [37.565]	0.587 ± 0.083	0.925 [0.86, 0.97]
MyConnectome	558	3.404 ± 3.098	1053 ± 527 [50.056]	0.736 ± 0.206	0.643 [0.42, 0.82]
MyConnectome	559	1.111 ± 1.000	662 ± 235 [35.558]	0.819 ± 0.072	0.955 [0.91, 0.98]
MyConnectome	560	1.159 ± 1.049	969 ± 290 [29.918]	0.878 ± 0.035	0.905 [0.80, 0.96]
MyConnectome	561	1.860 ± 1.199	426 ± 188 [44.173]	0.681 ± 0.110	0.981 [0.97, 0.99]
MyConnectome	562	5.627 ± 3.521	1202 ± 683 [56.837]	0.658 ± 0.134	0.310 [0.14, 0.54]
MyConnectome	563	1.844 ± 1.632	1362 ± 467 [34.309]	0.823 ± 0.102	0.723 [0.49, 0.87]
MyConnectome	564	1.736 ± 1.157	402 ± 303 [75.400]	0.599 ± 0.180	0.478 [0.26, 0.70]
MyConnectome	565	2.058 ± 1.359	306 ± 98 [31.832]	0.660 ± 0.071	0.977 [0.96, 0.99]
MyConnectome	566	3.178 ± 2.271	365 ± 124 [33.999]	0.613 ± 0.091	0.445 [0.24, 0.67]
MyConnectome	567	0.869 ± 0.906	496 ± 130 [26.175]	0.752 ± 0.089	0.830 [0.68, 0.92]
MyConnectome	568	1.772 ± 0.930	481 ± 317 [65.951]	0.720 ± 0.133	0.713 [0.51, 0.86]
MyConnectome	569	1.459 ± 1.316	726 ± 353 [48.662]	0.792 ± 0.123	0.935 [0.88, 0.97]
MyConnectome	570	2.699 ± 1.524	766 ± 516 [67.362]	0.726 ± 0.111	0.587 [0.36, 0.78]
MyConnectome	571	0.620 ± 0.307	829 ± 172 [20.754]	0.790 ± 0.044	0.961 [0.93, 0.98]
MyConnectome	572	1.824 ± 1.927	296 ± 68 [22.858]	0.676 ± 0.067	0.983 [0.97, 0.99]
MyConnectome	573	0.896 ± 0.691	423 ± 245 [57.926]	0.791 ± 0.105	0.947 [0.89, 0.98]
MyConnectome	574	1.796 ± 1.661	351 ± 152 [43.349]	0.772 ± 0.106	0.940 [0.89, 0.97]
MyConnectome	575	1.750 ± 1.025	306 ± 133 [43.616]	0.627 ± 0.098	0.984 [0.97, 0.99]
MyConnectome	576	2.188 ± 3.104	1053 ± 252 [23.908]	0.751 ± 0.076	0.600 [0.36, 0.79]
MyConnectome	577	0.968 ± 1.067	951 ± 241 [25.321]	0.755 ± 0.093	0.603 [0.37, 0.80]
MyConnectome	578	2.811 ± 2.242	2475 ± 1007 [40.695]	0.786 ± 0.093	0.760 [0.58, 0.88]
MyConnectome	579	2.639 ± 1.567	305 ± 216 [70.700]	0.546 ± 0.128	0.767 [0.60, 0.89]
MyConnectome	580	3.143 ± 1.522	248 ± 145 [58.655]	0.529 ± 0.116	0.969 [0.95, 0.99]
MyConnectome	581	4.110 ± 2.024	262 ± 175 [66.599]	0.555 ± 0.115	0.934 [0.89, 0.97]
MyConnectome	582	2.403 ± 1.500	266 ± 156 [58.553]	0.694 ± 0.104	0.972 [0.95, 0.99]
MyConnectome	583	3.150 ± 1.436	529 ± 357 [67.500]	0.691 ± 0.136	0.663 [0.43, 0.83]
MyConnectome	584	2.724 ± 1.375	282 ± 143 [50.700]	0.667 ± 0.103	0.984 [0.97, 0.99]
MyConnectome	585	1.480 ± 1.235	280 ± 98 [35.127]	0.623 ± 0.101	0.965 [0.94, 0.98]
MyConnectome	586	2.178 ± 1.703	1971 ± 923 [46.823]	0.755 ± 0.121	0.603 [0.38, 0.79]
MyConnectome	587	2.770 ± 1.019	131 ± 93 [70.897]	0.445 ± 0.116	0.955 [0.92, 0.98]
MyConnectome	588	1.354 ± 0.797	1411 ± 897 [63.545]	0.778 ± 0.135	0.357 [0.17, 0.59]
MyConnectome	589	4.258 ± 2.246	578 ± 245 [42.468]	0.713 ± 0.097	0.897 [0.81, 0.95]
MyConnectome	590	4.473 ± 2.418	716 ± 369 [51.483]	0.665 ± 0.110	0.935 [0.88, 0.97]
MyConnectome	591	2.960 ± 1.427	283 ± 151 [53.524]	0.501 ± 0.115	0.797 [0.68, 0.90]
MyConnectome	592	4.135 ± 2.932	1860 ± 971 [52.235]	0.784 ± 0.110	0.131 [0.06, 0.28]
MyConnectome	593	3.118 ± 1.967	22 ± 23 [103.465]	0.125 ± 0.059	0.569 [0.41, 0.75]
MyConnectome	594	2.057 ± 0.817	874 ± 627 [71.811]	0.704 ± 0.116	0.415 [0.22, 0.64]
MyConnectome	595	1.687 ± 1.158	750 ± 480 [63.995]	0.830 ± 0.090	0.822 [0.68, 0.92]
MyConnectome	596	0.648 ± 0.724	1022 ± 262 [25.619]	0.894 ± 0.068	0.984 [0.96, 0.99]
MyConnectome	597	1.352 ± 1.219	681 ± 300 [44.069]	0.789 ± 0.129	0.956 [0.92, 0.98]
MyConnectome	598	4.006 ± 2.101	1010 ± 754 [74.647]	0.716 ± 0.134	0.417 [0.24, 0.63]
MyConnectome	599	2.630 ± 1.172	1647 ± 1208 [73.333]	0.800 ± 0.117	0.712 [0.50, 0.86]
MyConnectome	600	4.555 ± 2.191	712 ± 404 [56.695]	0.648 ± 0.135	0.676 [0.44, 0.84]
MyConnectome	601	2.399 ± 1.242	288 ± 180 [62.582]	0.598 ± 0.125	0.952 [0.92, 0.98]
MyConnectome	602	3.357 ± 1.658	281 ± 190 [67.684]	0.511 ± 0.144	0.823 [0.65, 0.92]
MyConnectome	603	2.052 ± 2.107	1472 ± 692 [47.033]	0.795 ± 0.139	0.770 [0.63, 0.88]
MyConnectome	604	1.360 ± 1.572	650 ± 242 [37.249]	0.704 ± 0.136	0.639 [0.42, 0.82]
MyConnectome	605	2.163 ± 1.143	589 ± 330 [55.984]	0.708 ± 0.137	0.495 [0.29, 0.71]
MyConnectome	606	2.209 ± 1.828	1232 ± 599 [48.643]	0.819 ± 0.105	0.925 [0.85, 0.97]
MyConnectome	607	6.544 ± 5.492	2736 ± 1199 [43.828]	0.766 ± 0.148	0.790 [0.62, 0.90]
MyConnectome	608	1.756 ± 0.926	379 ± 155 [40.962]	0.805 ± 0.078	0.971 [0.94, 0.99]
MyConnectome	609	1.820 ± 1.661	1608 ± 935 [58.111]	0.814 ± 0.107	0.844 [0.67, 0.93]
MyConnectome	610	1.494 ± 1.015	196 ± 101 [51.653]	0.663 ± 0.118	0.904 [0.81, 0.96]
MyConnectome	611	1.179 ± 1.191	1303 ± 590 [45.256]	0.816 ± 0.123	0.682 [0.48, 0.84]
MyConnectome	612	2.808 ± 1.842	425 ± 166 [38.921]	0.626 ± 0.106	0.959 [0.93, 0.98]
MyConnectome	613	0.940 ± 0.855	367 ± 98 [26.783]	0.836 ± 0.046	0.994 [0.99, 1.00]
MyConnectome	614	2.206 ± 1.364	252 ± 118 [46.805]	0.712 ± 0.104	0.982 [0.97, 0.99]
MyConnectome	615	1.946 ± 1.608	631 ± 261 [41.320]	0.768 ± 0.112	0.748 [0.56, 0.88]
MyConnectome	616	1.732 ± 1.500	535 ± 235 [43.909]	0.682 ± 0.085	0.709 [0.50, 0.86]
MyConnectome	617	1.727 ± 0.716	117 ± 75 [64.015]	0.549 ± 0.122	0.949 [0.91, 0.98]
MyConnectome	618	1.685 ± 0.639	56 ± 23 [41.970]	0.351 ± 0.070	0.933 [0.88, 0.97]
MyConnectome	619	2.282 ± 1.647	1480 ± 907 [61.238]	0.737 ± 0.120	0.707 [0.51, 0.86]
MyConnectome	620	1.097 ± 0.848	241 ± 112 [46.629]	0.627 ± 0.146	0.912 [0.83, 0.96]
MyConnectome	621	0.916 ± 0.629	957 ± 432 [45.091]	0.875 ± 0.080	0.944 [0.90, 0.97]
MyConnectome	622	1.111 ± 0.985	570 ± 234 [41.092]	0.818 ± 0.104	0.797 [0.63, 0.90]
MyConnectome	623	3.326 ± 1.024	38 ± 35 [92.801]	0.329 ± 0.176	0.741 [0.60, 0.87]
MyConnectome	624	3.455 ± 1.444	117 ± 99 [84.485]	0.336 ± 0.142	0.905 [0.84, 0.95]
MyConnectome	625	1.733 ± 0.862	627 ± 539 [86.089]	0.738 ± 0.135	0.873 [0.77, 0.94]
MyConnectome	626	0.766 ± 0.559	502 ± 120 [23.966]	0.815 ± 0.058	0.994 [0.99, 1.00]
MyConnectome	627	1.504 ± 1.197	669 ± 361 [53.861]	0.770 ± 0.135	0.845 [0.69, 0.93]
MyConnectome	628	1.189 ± 1.117	864 ± 275 [31.814]	0.747 ± 0.097	0.902 [0.82, 0.96]
MyConnectome	629	2.172 ± 2.020	393 ± 149 [37.934]	0.672 ± 0.085	0.949 [0.91, 0.98]
MyConnectome	630	2.243 ± 0.860	156 ± 49 [31.459]	0.528 ± 0.067	0.951 [0.91, 0.98]
MyConnectome	631	3.999 ± 3.369	1370 ± 864 [63.096]	0.670 ± 0.178	0.224 [0.10, 0.42]
MyConnectome	632	2.102 ± 1.506	711 ± 460 [64.678]	0.747 ± 0.146	0.828 [0.69, 0.92]
MyConnectome	633	1.445 ± 1.650	999 ± 314 [31.431]	0.795 ± 0.072	0.838 [0.67, 0.93]
MyConnectome	634	1.740 ± 1.497	854 ± 587 [68.767]	0.777 ± 0.119	0.744 [0.55, 0.88]
MyConnectome	635	1.175 ± 1.178	1145 ± 234 [20.393]	0.792 ± 0.041	0.836 [0.66, 0.93]
MyConnectome	636	2.309 ± 1.100	300 ± 159 [52.963]	0.603 ± 0.102	0.965 [0.94, 0.98]
MyConnectome	637	1.900 ± 1.264	463 ± 303 [65.528]	0.727 ± 0.095	0.965 [0.94, 0.98]
MyConnectome	638	1.212 ± 1.079	484 ± 96 [19.845]	0.790 ± 0.042	0.991 [0.98, 1.00]
MyConnectome	639	1.166 ± 1.251	1056 ± 367 [34.778]	0.842 ± 0.092	0.816 [0.65, 0.92]
MyConnectome	640	2.020 ± 1.249	1200 ± 647 [53.955]	0.724 ± 0.114	0.318 [0.15, 0.55]
MyConnectome	641	1.942 ± 1.295	1048 ± 605 [57.698]	0.690 ± 0.170	0.285 [0.14, 0.50]
MyConnectome	642	3.506 ± 2.738	2618 ± 1309 [50.020]	0.791 ± 0.099	0.474 [0.25, 0.70]
MyConnectome	643	1.999 ± 1.055	196 ± 116 [59.201]	0.591 ± 0.123	0.963 [0.93, 0.98]
MyConnectome	644	4.458 ± 2.028	123 ± 69 [56.261]	0.448 ± 0.095	0.923 [0.87, 0.96]
MyConnectome	645	2.959 ± 2.053	369 ± 203 [55.004]	0.647 ± 0.151	0.528 [0.32, 0.74]
MyConnectome	646	1.571 ± 1.087	1385 ± 698 [50.362]	0.846 ± 0.095	0.881 [0.79, 0.94]
MyConnectome	647	0.879 ± 0.505	204 ± 63 [31.096]	0.736 ± 0.065	0.978 [0.96, 0.99]
MyConnectome	648	1.909 ± 1.378	187 ± 96 [51.161]	0.699 ± 0.118	0.964 [0.93, 0.98]
MyConnectome	649	2.440 ± 2.382	2176 ± 1004 [46.119]	0.798 ± 0.107	0.556 [0.35, 0.75]
MyConnectome	650	2.454 ± 1.343	925 ± 548 [59.232]	0.746 ± 0.126	0.619 [0.38, 0.81]
MyConnectome	651	4.429 ± 2.352	424 ± 240 [56.628]	0.597 ± 0.088	0.870 [0.75, 0.94]
MyConnectome	652	4.445 ± 2.814	39 ± 34 [85.817]	0.185 ± 0.093	0.156 [0.07, 0.32]
MyConnectome	653	2.458 ± 1.107	464 ± 261 [56.162]	0.709 ± 0.120	0.811 [0.64, 0.91]
MyConnectome	654	1.852 ± 0.971	240 ± 73 [30.502]	0.682 ± 0.070	0.966 [0.94, 0.98]
MyConnectome	655	1.160 ± 0.743	1235 ± 517 [41.838]	0.853 ± 0.065	0.925 [0.86, 0.97]
MyConnectome	656	3.059 ± 1.513	188 ± 341 [180.967]	0.377 ± 0.198	0.186 [0.09, 0.36]
MyConnectome	657	1.432 ± 0.755	1060 ± 584 [55.124]	0.755 ± 0.116	0.237 [0.11, 0.44]
MyConnectome	658	1.583 ± 1.171	996 ± 622 [62.451]	0.797 ± 0.102	0.897 [0.80, 0.95]
MyConnectome	659	3.950 ± 2.909	1189 ± 802 [67.462]	0.647 ± 0.147	0.217 [0.10, 0.41]
MyConnectome	660	1.383 ± 0.938	1332 ± 648 [48.665]	0.876 ± 0.094	0.931 [0.85, 0.97]
MyConnectome	661	4.239 ± 2.812	376 ± 204 [54.393]	0.544 ± 0.154	0.237 [0.11, 0.44]
MyConnectome	662	1.019 ± 0.665	783 ± 382 [48.736]	0.726 ± 0.153	0.479 [0.27, 0.70]
MyConnectome	663	1.828 ± 1.172	785 ± 297 [37.913]	0.806 ± 0.084	0.926 [0.84, 0.97]
MyConnectome	664	2.950 ± 1.525	312 ± 183 [58.595]	0.574 ± 0.082	0.968 [0.94, 0.98]
MyConnectome	665	5.855 ± 2.893	2383 ± 1147 [48.133]	0.741 ± 0.118	0.470 [0.26, 0.69]
MyConnectome	666	1.137 ± 1.136	1094 ± 404 [36.899]	0.813 ± 0.091	0.955 [0.91, 0.98]
MyConnectome	667	1.591 ± 1.076	531 ± 335 [63.190]	0.729 ± 0.139	0.856 [0.73, 0.93]
MyConnectome	668	0.892 ± 0.589	206 ± 50 [24.502]	0.693 ± 0.087	0.994 [0.99, 1.00]
MyConnectome	669	4.872 ± 2.168	31 ± 40 [129.674]	0.149 ± 0.063	0.435 [0.28, 0.64]
MyConnectome	670	3.563 ± 2.477	1358 ± 582 [42.851]	0.750 ± 0.097	0.399 [0.21, 0.62]
MyConnectome	671	3.587 ± 2.007	286 ± 141 [49.166]	0.602 ± 0.083	0.934 [0.88, 0.97]
MyConnectome	672	3.657 ± 2.477	220 ± 109 [49.620]	0.531 ± 0.118	0.943 [0.90, 0.97]
MyConnectome	673	2.218 ± 2.509	1103 ± 564 [51.085]	0.710 ± 0.155	0.765 [0.61, 0.88]
MyConnectome	674	3.167 ± 2.293	1123 ± 1022 [91.000]	0.671 ± 0.157	0.541 [0.35, 0.74]
MyConnectome	675	2.068 ± 1.431	374 ± 262 [70.248]	0.629 ± 0.141	0.526 [0.34, 0.72]
MyConnectome	676	1.881 ± 0.825	106 ± 47 [44.275]	0.583 ± 0.066	0.912 [0.85, 0.96]
MyConnectome	677	2.282 ± 1.463	601 ± 260 [43.284]	0.751 ± 0.075	0.950 [0.91, 0.98]
MyConnectome	678	1.457 ± 1.045	233 ± 129 [55.168]	0.693 ± 0.120	0.948 [0.90, 0.98]
MyConnectome	679	0.657 ± 0.812	1086 ± 325 [29.939]	0.883 ± 0.069	0.975 [0.96, 0.99]
MyConnectome	680	2.806 ± 1.419	739 ± 439 [59.346]	0.702 ± 0.095	0.914 [0.85, 0.96]
MyConnectome	681	0.816 ± 0.384	229 ± 65 [28.525]	0.766 ± 0.080	0.992 [0.99, 1.00]
MyConnectome	682	2.230 ± 1.490	197 ± 88 [44.952]	0.532 ± 0.109	0.978 [0.96, 0.99]
MyConnectome	683	2.102 ± 1.195	211 ± 106 [50.091]	0.615 ± 0.116	0.748 [0.56, 0.88]
MyConnectome	684	0.958 ± 0.922	349 ± 84 [24.053]	0.772 ± 0.061	0.991 [0.98, 1.00]
MyConnectome	685	2.911 ± 1.607	91 ± 75 [82.686]	0.484 ± 0.151	0.461 [0.29, 0.67]
MyConnectome	686	1.247 ± 1.099	537 ± 171 [31.745]	0.776 ± 0.061	0.859 [0.72, 0.94]
MyConnectome	687	2.375 ± 1.223	486 ± 290 [59.649]	0.710 ± 0.160	0.671 [0.48, 0.83]
MyConnectome	688	-	-	-	-
MyConnectome	689	1.267 ± 0.841	203 ± 58 [28.319]	0.610 ± 0.097	0.985 [0.97, 0.99]
MyConnectome	690	2.102 ± 1.217	249 ± 102 [41.124]	0.769 ± 0.038	0.959 [0.93, 0.98]
MyConnectome	691	1.089 ± 0.744	825 ± 435 [52.748]	0.851 ± 0.085	0.776 [0.60, 0.89]
MyConnectome	692	1.170 ± 1.126	369 ± 103 [27.822]	0.739 ± 0.095	0.713 [0.51, 0.86]
MyConnectome	693	1.803 ± 0.417	104 ± 44 [42.679]	0.582 ± 0.066	0.915 [0.86, 0.96]
MyConnectome	694	1.592 ± 0.989	562 ± 369 [65.733]	0.781 ± 0.116	0.913 [0.83, 0.96]
MyConnectome	695	3.640 ± 2.739	538 ± 267 [49.633]	0.729 ± 0.065	0.935 [0.89, 0.97]
MyConnectome	696	2.274 ± 1.604	293 ± 150 [51.163]	0.656 ± 0.100	0.954 [0.92, 0.98]
MyConnectome	697	1.403 ± 1.283	574 ± 166 [28.851]	0.755 ± 0.049	0.842 [0.68, 0.93]
MyConnectome	698	5.297 ± 2.578	1250 ± 809 [64.749]	0.600 ± 0.153	0.214 [0.09, 0.41]
MyConnectome	699	1.653 ± 1.044	958 ± 459 [47.936]	0.791 ± 0.095	0.940 [0.89, 0.97]
MyConnectome	700	3.432 ± 1.937	248 ± 133 [53.732]	0.520 ± 0.121	0.873 [0.79, 0.94]
MyConnectome	701	1.131 ± 1.140	795 ± 234 [29.438]	0.856 ± 0.117	0.907 [0.80, 0.96]
MyConnectome	702	1.624 ± 1.426	363 ± 162 [44.573]	0.736 ± 0.105	0.940 [0.87, 0.97]
MyConnectome	703	2.257 ± 1.372	1614 ± 1023 [63.380]	0.785 ± 0.128	0.589 [0.40, 0.77]
MyConnectome	704	0.754 ± 0.653	276 ± 73 [26.277]	0.748 ± 0.088	0.991 [0.98, 1.00]
MyConnectome	705	1.241 ± 1.300	377 ± 134 [35.513]	0.751 ± 0.107	0.839 [0.68, 0.93]
MyConnectome	706	2.717 ± 1.436	1056 ± 644 [61.027]	0.701 ± 0.114	0.331 [0.16, 0.56]
MyConnectome	707	5.101 ± 1.943	397 ± 186 [46.954]	0.712 ± 0.109	0.591 [0.35, 0.79]
MyConnectome	708	3.214 ± 2.501	2320 ± 1000 [43.083]	0.739 ± 0.132	0.155 [0.06, 0.32]
MyConnectome	709	0.793 ± 0.593	661 ± 246 [37.265]	0.879 ± 0.069	0.943 [0.87, 0.98]
MyConnectome	710	1.104 ± 1.029	1030 ± 440 [42.737]	0.851 ± 0.104	0.887 [0.76, 0.95]
MyConnectome	711	2.966 ± 1.880	456 ± 291 [63.836]	0.745 ± 0.108	0.757 [0.57, 0.88]
MyConnectome	712	3.047 ± 1.968	2422 ± 958 [39.575]	0.803 ± 0.127	0.557 [0.33, 0.76]
MyConnectome	713	1.406 ± 0.484	81 ± 17 [21.174]	0.396 ± 0.036	0.842 [0.74, 0.92]
MyConnectome	714	0.985 ± 0.926	260 ± 85 [32.648]	0.756 ± 0.097	0.972 [0.95, 0.99]
MyConnectome	715	0.634 ± 0.728	467 ± 120 [25.809]	0.848 ± 0.078	0.936 [0.86, 0.97]
MyConnectome	716	1.028 ± 0.625	637 ± 352 [55.291]	0.801 ± 0.119	0.849 [0.72, 0.93]
MyConnectome	717	1.349 ± 1.034	419 ± 224 [53.489]	0.746 ± 0.135	0.950 [0.90, 0.98]
MyConnectome	718	1.799 ± 1.105	377 ± 178 [47.084]	0.664 ± 0.116	0.753 [0.57, 0.88]
MyConnectome	719	2.267 ± 1.624	215 ± 93 [43.325]	0.614 ± 0.122	0.944 [0.90, 0.97]
MyConnectome	720	2.120 ± 1.476	527 ± 286 [54.344]	0.720 ± 0.110	0.859 [0.72, 0.94]
MyConnectome	721	2.499 ± 0.965	189 ± 117 [61.829]	0.548 ± 0.141	0.916 [0.85, 0.96]
MyConnectome	722	0.994 ± 0.993	888 ± 311 [35.049]	0.853 ± 0.085	0.842 [0.70, 0.93]
MyConnectome	723	3.769 ± 2.062	616 ± 356 [57.794]	0.657 ± 0.134	0.779 [0.59, 0.90]
MyConnectome	724	3.856 ± 2.271	672 ± 455 [67.595]	0.625 ± 0.178	0.774 [0.61, 0.89]
MyConnectome	725	1.827 ± 1.881	968 ± 457 [47.215]	0.780 ± 0.139	0.788 [0.61, 0.90]
MyConnectome	726	4.381 ± 2.440	773 ± 558 [72.242]	0.663 ± 0.186	0.586 [0.36, 0.78]
MyConnectome	727	3.443 ± 2.172	292 ± 142 [48.845]	0.622 ± 0.098	0.975 [0.96, 0.99]
MyConnectome	728	1.700 ± 1.393	1397 ± 567 [40.568]	0.843 ± 0.104	0.885 [0.77, 0.95]
MyConnectome	729	-	-	-	-
MyConnectome	730	3.681 ± 2.226	347 ± 158 [45.702]	0.535 ± 0.096	0.864 [0.77, 0.93]
MyConnectome	731	2.368 ± 2.187	1877 ± 1017 [54.175]	0.802 ± 0.116	0.724 [0.55, 0.86]
MyConnectome	732	2.538 ± 1.352	704 ± 539 [76.500]	0.584 ± 0.204	0.308 [0.17, 0.52]
MyConnectome	733	2.204 ± 1.171	980 ± 681 [69.437]	0.670 ± 0.163	0.181 [0.09, 0.35]
MyConnectome	734	0.762 ± 0.951	868 ± 233 [26.889]	0.878 ± 0.084	0.808 [0.66, 0.91]
MyConnectome	735	2.227 ± 1.538	235 ± 100 [42.700]	0.685 ± 0.067	0.786 [0.65, 0.89]
MyConnectome	736	1.760 ± 1.926	1743 ± 636 [36.471]	0.839 ± 0.058	0.461 [0.27, 0.68]
MyConnectome	737	-	-	-	-
MyConnectome	738	2.916 ± 1.689	182 ± 104 [57.315]	0.529 ± 0.110	0.940 [0.90, 0.97]
MyConnectome	739	2.238 ± 1.566	203 ± 115 [56.855]	0.617 ± 0.162	0.938 [0.89, 0.97]
MyConnectome	740	0.821 ± 0.551	269 ± 66 [24.487]	0.744 ± 0.067	0.992 [0.99, 1.00]
MyConnectome	741	1.209 ± 1.108	174 ± 30 [17.352]	0.648 ± 0.034	0.983 [0.97, 0.99]
MyConnectome	742	1.743 ± 1.210	286 ± 130 [45.485]	0.680 ± 0.152	0.928 [0.86, 0.97]
MyConnectome	743	4.876 ± 1.800	485 ± 378 [77.927]	0.503 ± 0.233	0.695 [0.47, 0.85]
MyConnectome	744	1.995 ± 1.395	708 ± 412 [58.230]	0.834 ± 0.085	0.859 [0.75, 0.93]
MyConnectome	745	2.176 ± 1.522	1879 ± 363 [19.302]	0.875 ± 0.026	0.772 [0.58, 0.89]
MyConnectome	746	2.981 ± 1.908	270 ± 172 [63.879]	0.614 ± 0.156	0.926 [0.87, 0.96]
MyConnectome	747	1.689 ± 1.535	859 ± 524 [60.965]	0.761 ± 0.142	0.634 [0.42, 0.81]
MyConnectome	748	2.242 ± 1.274	765 ± 386 [50.487]	0.732 ± 0.097	0.794 [0.60, 0.91]
MyConnectome	749	1.988 ± 0.659	127 ± 70 [55.416]	0.645 ± 0.048	0.951 [0.91, 0.98]
MyConnectome	750	-	-	-	-
MyConnectome	751	2.046 ± 1.703	233 ± 84 [35.934]	0.643 ± 0.102	0.923 [0.85, 0.97]
MyConnectome	752	1.483 ± 1.272	885 ± 540 [61.024]	0.717 ± 0.194	0.309 [0.17, 0.52]
MyConnectome	753	1.806 ± 1.830	1125 ± 546 [48.547]	0.824 ± 0.129	0.905 [0.81, 0.96]
MyConnectome	754	4.558 ± 2.068	131 ± 104 [79.089]	0.368 ± 0.148	0.925 [0.87, 0.96]
MyConnectome	755	5.720 ± 2.359	1119 ± 838 [74.931]	0.536 ± 0.156	0.169 [0.07, 0.35]
MyConnectome	756	5.169 ± 2.750	700 ± 474 [67.691]	0.574 ± 0.166	0.593 [0.39, 0.78]
MyConnectome	757	3.443 ± 2.153	2577 ± 1155 [44.845]	0.745 ± 0.111	0.350 [0.17, 0.58]
MyConnectome	758	3.573 ± 2.182	187 ± 91 [48.913]	0.608 ± 0.083	0.966 [0.94, 0.98]
MyConnectome	759	3.148 ± 1.258	452 ± 342 [75.658]	0.530 ± 0.143	0.495 [0.29, 0.71]
MyConnectome	760	1.762 ± 1.025	111 ± 64 [57.566]	0.547 ± 0.144	0.958 [0.93, 0.98]
MyConnectome	761	1.102 ± 0.956	251 ± 48 [19.288]	0.711 ± 0.042	0.992 [0.99, 1.00]
MyConnectome	762	-	-	-	-
MyConnectome	763	4.343 ± 2.902	1407 ± 771 [54.760]	0.674 ± 0.196	0.209 [0.09, 0.40]
MyConnectome	764	4.420 ± 1.664	1525 ± 1275 [83.624]	0.485 ± 0.207	0.124 [0.05, 0.27]
MyConnectome	765	4.524 ± 3.550	3832 ± 1587 [41.401]	0.775 ± 0.092	0.303 [0.14, 0.53]
MyConnectome	766	0.855 ± 0.820	287 ± 73 [25.483]	0.754 ± 0.086	0.993 [0.99, 1.00]
MyConnectome	767	2.395 ± 1.345	107 ± 53 [49.715]	0.422 ± 0.130	0.937 [0.89, 0.97]
MyConnectome	768	1.545 ± 0.953	436 ± 356 [81.589]	0.719 ± 0.163	0.796 [0.65, 0.90]
MyConnectome	769	1.603 ± 1.326	1046 ± 410 [39.151]	0.802 ± 0.102	0.845 [0.69, 0.93]
MyConnectome	770	1.279 ± 0.726	1649 ± 655 [39.710]	0.769 ± 0.077	0.688 [0.47, 0.85]
MyConnectome	771	2.021 ± 0.698	132 ± 37 [27.963]	0.630 ± 0.054	0.901 [0.83, 0.95]
MyConnectome	772	2.451 ± 1.393	228 ± 109 [47.935]	0.660 ± 0.087	0.965 [0.94, 0.98]
MyConnectome	773	2.944 ± 1.713	261 ± 121 [46.329]	0.615 ± 0.106	0.917 [0.86, 0.96]
MyConnectome	774	3.760 ± 2.756	342 ± 170 [49.813]	0.587 ± 0.138	0.944 [0.90, 0.97]
MyConnectome	775	1.209 ± 0.734	734 ± 504 [68.769]	0.709 ± 0.174	0.682 [0.47, 0.84]
MyConnectome	776	2.519 ± 0.955	371 ± 239 [64.401]	0.639 ± 0.144	0.871 [0.79, 0.94]
MyConnectome	777	2.060 ± 1.243	263 ± 109 [41.498]	0.655 ± 0.093	0.975 [0.96, 0.99]
MyConnectome	778	4.252 ± 3.465	2288 ± 1187 [51.871]	0.760 ± 0.170	0.796 [0.62, 0.91]
MyConnectome	779	2.506 ± 1.355	349 ± 164 [47.029]	0.657 ± 0.114	0.956 [0.92, 0.98]
MyConnectome	780	2.241 ± 2.042	1452 ± 729 [50.204]	0.770 ± 0.144	0.311 [0.18, 0.51]
MyConnectome	781	5.181 ± 3.776	143 ± 290 [203.045]	0.314 ± 0.268	0.156 [0.07, 0.32]
MyConnectome	782	2.685 ± 2.417	1641 ± 938 [57.165]	0.757 ± 0.138	0.131 [0.06, 0.28]
MyConnectome	783	2.492 ± 1.082	61 ± 50 [81.774]	0.351 ± 0.171	0.922 [0.87, 0.96]
MyConnectome	784	1.122 ± 0.894	172 ± 45 [26.140]	0.711 ± 0.072	0.993 [0.99, 1.00]
MyConnectome	785	3.647 ± 3.586	1465 ± 568 [38.745]	0.718 ± 0.130	0.316 [0.14, 0.55]
MyConnectome	786	3.507 ± 1.751	94 ± 46 [49.293]	0.475 ± 0.093	0.944 [0.90, 0.97]
MyConnectome	787	3.092 ± 1.933	873 ± 496 [56.840]	0.653 ± 0.163	0.290 [0.14, 0.50]
MyConnectome	788	1.550 ± 0.749	97 ± 43 [44.736]	0.647 ± 0.048	0.965 [0.94, 0.98]
MyConnectome	789	1.843 ± 0.842	103 ± 40 [38.503]	0.579 ± 0.086	0.967 [0.94, 0.98]
MyConnectome	790	1.817 ± 1.055	336 ± 58 [17.319]	0.707 ± 0.028	0.972 [0.95, 0.99]
MyConnectome	791	2.261 ± 1.194	850 ± 465 [54.647]	0.810 ± 0.082	0.949 [0.91, 0.98]
MyConnectome	792	-	-	-	-
MyConnectome	793	2.744 ± 1.921	573 ± 241 [42.069]	0.692 ± 0.081	0.930 [0.88, 0.97]
MyConnectome	794	1.312 ± 0.630	311 ± 88 [28.257]	0.770 ± 0.031	0.972 [0.95, 0.99]
MyConnectome	795	2.099 ± 1.002	107 ± 36 [33.898]	0.368 ± 0.078	0.931 [0.88, 0.97]
MyConnectome	796	-	-	-	-
MyConnectome	797	3.043 ± 1.491	76 ± 24 [32.055]	0.453 ± 0.113	0.810 [0.70, 0.90]
MyConnectome	798	5.143 ± 1.940	57 ± 25 [43.790]	0.329 ± 0.067	0.565 [0.37, 0.76]
MyConnectome	799	3.161 ± 1.741	33 ± 13 [38.106]	0.283 ± 0.069	0.724 [0.59, 0.85]
HCP	0	1.351 ± 0.855	2317 ± 720 [31.056]	0.804 ± 0.044	0.866 [0.74, 0.94]
HCP	1	1.620 ± 0.957	1223 ± 382 [31.265]	0.911 ± 0.041	0.592 [0.40, 0.78]
HCP	2	1.450 ± 0.652	1715 ± 976 [56.943]	0.759 ± 0.065	0.911 [0.81, 0.96]
HCP	3	3.779 ± 1.423	739 ± 439 [59.375]	0.628 ± 0.127	0.877 [0.78, 0.94]
HCP	4	1.701 ± 1.280	2123 ± 671 [31.590]	0.796 ± 0.041	0.880 [0.76, 0.95]
HCP	5	2.208 ± 1.380	3960 ± 1864 [47.063]	0.879 ± 0.087	0.660 [0.44, 0.83]
HCP	6	1.552 ± 0.666	881 ± 348 [39.510]	0.883 ± 0.053	0.520 [0.31, 0.73]
HCP	7	2.313 ± 1.298	1065 ± 696 [65.398]	0.696 ± 0.079	0.871 [0.74, 0.94]
HCP	8	4.982 ± 3.705	4584 ± 1497 [32.664]	0.894 ± 0.054	0.585 [0.38, 0.78]
HCP	9	2.526 ± 1.570	1398 ± 703 [50.282]	0.680 ± 0.082	0.599 [0.39, 0.79]
HCP	10	3.618 ± 3.004	3849 ± 1693 [43.992]	0.859 ± 0.077	0.695 [0.50, 0.85]
HCP	11	1.280 ± 0.767	2361 ± 764 [32.348]	0.798 ± 0.047	0.881 [0.75, 0.95]
HCP	12	1.847 ± 0.816	1550 ± 931 [60.078]	0.778 ± 0.066	0.931 [0.86, 0.97]
HCP	13	1.529 ± 0.621	4067 ± 1918 [47.163]	0.868 ± 0.071	0.058 [0.02, 0.14]
HCP	14	2.701 ± 0.968	767 ± 481 [62.743]	0.698 ± 0.063	0.902 [0.80, 0.96]
HCP	15	1.879 ± 1.384	1558 ± 870 [55.853]	0.758 ± 0.068	0.898 [0.78, 0.96]
HCP	16	1.965 ± 1.180	960 ± 419 [43.686]	0.836 ± 0.067	0.626 [0.40, 0.81]
HCP	17	1.623 ± 1.070	2261 ± 619 [27.358]	0.921 ± 0.044	0.233 [0.10, 0.44]
HCP	18	2.038 ± 1.314	1496 ± 591 [39.533]	0.774 ± 0.079	0.584 [0.37, 0.78]
HCP	19	3.109 ± 2.601	1656 ± 879 [53.079]	0.761 ± 0.167	0.438 [0.25, 0.66]
HCP	20	1.803 ± 0.864	1477 ± 898 [60.761]	0.740 ± 0.074	0.908 [0.81, 0.96]
HCP	21	1.667 ± 1.040	1486 ± 327 [22.024]	0.804 ± 0.043	0.924 [0.85, 0.97]
HCP	22	2.925 ± 2.293	711 ± 314 [44.174]	0.773 ± 0.107	0.794 [0.64, 0.90]
HCP	23	3.897 ± 2.258	2155 ± 1138 [52.823]	0.726 ± 0.099	0.393 [0.20, 0.63]
HCP	24	2.308 ± 1.104	1009 ± 622 [61.614]	0.744 ± 0.108	0.899 [0.81, 0.95]
HCP	25	1.459 ± 0.633	714 ± 356 [49.797]	0.873 ± 0.063	0.373 [0.20, 0.59]
HCP	26	1.962 ± 0.690	469 ± 268 [57.215]	0.734 ± 0.075	0.948 [0.90, 0.98]
HCP	27	2.461 ± 1.513	664 ± 311 [46.784]	0.673 ± 0.091	0.913 [0.84, 0.96]
HCP	28	2.417 ± 0.743	1435 ± 668 [46.503]	0.743 ± 0.053	0.915 [0.82, 0.96]
HCP	29	1.195 ± 0.805	4226 ± 1130 [26.746]	0.945 ± 0.034	0.325 [0.15, 0.55]
HCP	30	3.667 ± 3.390	4021 ± 810 [20.155]	0.910 ± 0.034	0.613 [0.38, 0.80]
HCP	31	2.972 ± 1.388	570 ± 297 [52.173]	0.635 ± 0.066	0.847 [0.74, 0.93]
HCP	32	2.411 ± 1.233	1532 ± 854 [55.738]	0.756 ± 0.077	0.759 [0.56, 0.89]
HCP	33	2.041 ± 0.875	1653 ± 865 [52.307]	0.767 ± 0.093	0.786 [0.61, 0.90]
HCP	34	2.171 ± 1.622	2073 ± 853 [41.136]	0.861 ± 0.081	0.756 [0.58, 0.88]
HCP	35	2.102 ± 0.872	692 ± 567 [81.984]	0.674 ± 0.085	0.878 [0.77, 0.94]
HCP	36	2.931 ± 1.409	1456 ± 965 [66.247]	0.651 ± 0.088	0.823 [0.67, 0.92]
HCP	37	1.388 ± 0.581	1367 ± 693 [50.668]	0.793 ± 0.070	0.866 [0.74, 0.94]
HCP	38	2.002 ± 0.940	1761 ± 597 [33.913]	0.785 ± 0.065	0.647 [0.42, 0.82]
HCP	39	1.247 ± 0.961	2144 ± 554 [25.847]	0.810 ± 0.047	0.853 [0.70, 0.94]
HCP	40	2.168 ± 1.116	2240 ± 409 [18.256]	0.873 ± 0.027	0.603 [0.37, 0.80]
HCP	41	3.340 ± 1.487	755 ± 629 [83.357]	0.574 ± 0.086	0.795 [0.62, 0.91]
HCP	42	1.872 ± 0.596	609 ± 479 [78.643]	0.617 ± 0.094	0.888 [0.78, 0.95]
HCP	43	2.267 ± 0.788	1133 ± 810 [71.538]	0.715 ± 0.080	0.830 [0.67, 0.92]
HCP	44	1.930 ± 0.696	1020 ± 505 [49.564]	0.727 ± 0.068	0.867 [0.75, 0.94]
HCP	45	1.644 ± 0.989	1102 ± 662 [60.117]	0.730 ± 0.074	0.931 [0.86, 0.97]
HCP	46	2.717 ± 1.126	636 ± 372 [58.438]	0.684 ± 0.082	0.901 [0.80, 0.96]
HCP	47	1.868 ± 0.678	545 ± 322 [59.087]	0.656 ± 0.077	0.842 [0.69, 0.93]
HCP	48	3.484 ± 1.754	212 ± 109 [51.511]	0.477 ± 0.104	0.523 [0.32, 0.73]
HCP	49	1.436 ± 0.537	755 ± 239 [31.629]	0.892 ± 0.043	0.492 [0.32, 0.69]
HCP	50	1.883 ± 0.924	668 ± 397 [59.447]	0.690 ± 0.087	0.907 [0.82, 0.96]
HCP	51	2.641 ± 1.305	1691 ± 951 [56.249]	0.654 ± 0.099	0.870 [0.74, 0.94]
HCP	52	1.681 ± 0.465	349 ± 210 [60.122]	0.709 ± 0.079	0.951 [0.91, 0.98]
HCP	53	1.311 ± 0.633	1371 ± 507 [36.985]	0.761 ± 0.060	0.873 [0.75, 0.94]
HCP	54	2.773 ± 1.859	1199 ± 871 [72.627]	0.577 ± 0.144	0.844 [0.71, 0.93]
HCP	55	1.977 ± 0.539	476 ± 252 [52.954]	0.641 ± 0.065	0.935 [0.87, 0.97]
HCP	56	1.648 ± 0.734	1543 ± 795 [51.484]	0.717 ± 0.082	0.559 [0.33, 0.76]
HCP	57	2.512 ± 1.365	683 ± 288 [42.084]	0.672 ± 0.092	0.901 [0.81, 0.96]
HCP	58	1.491 ± 0.429	822 ± 364 [44.276]	0.699 ± 0.103	0.929 [0.85, 0.97]
HCP	59	1.728 ± 0.961	1576 ± 769 [48.816]	0.789 ± 0.062	0.818 [0.67, 0.92]
HCP	60	2.697 ± 1.566	1002 ± 563 [56.205]	0.688 ± 0.098	0.543 [0.32, 0.75]
HCP	61	2.105 ± 1.463	2648 ± 1285 [48.545]	0.770 ± 0.085	0.528 [0.31, 0.74]
HCP	62	1.380 ± 0.508	1054 ± 447 [42.442]	0.815 ± 0.052	0.865 [0.73, 0.94]
HCP	63	2.175 ± 1.286	2588 ± 1212 [46.824]	0.738 ± 0.082	0.842 [0.69, 0.93]
HCP	64	2.261 ± 0.545	310 ± 164 [52.914]	0.629 ± 0.090	0.952 [0.91, 0.98]
HCP	65	2.451 ± 2.233	2602 ± 1186 [45.592]	0.766 ± 0.096	0.519 [0.29, 0.74]
HCP	66	3.020 ± 1.713	380 ± 238 [62.544]	0.588 ± 0.115	0.839 [0.68, 0.93]
HCP	67	1.411 ± 0.789	1963 ± 881 [44.899]	0.832 ± 0.069	0.845 [0.70, 0.93]
HCP	68	1.809 ± 1.022	1636 ± 776 [47.470]	0.767 ± 0.099	0.436 [0.24, 0.66]
HCP	69	1.992 ± 0.986	1561 ± 776 [49.737]	0.730 ± 0.099	0.816 [0.65, 0.92]
HCP	70	1.833 ± 1.190	684 ± 264 [38.580]	0.830 ± 0.092	0.295 [0.15, 0.51]
HCP	71	2.467 ± 1.382	2017 ± 1218 [60.353]	0.799 ± 0.084	0.245 [0.11, 0.45]
HCP	72	1.968 ± 1.379	1488 ± 754 [50.648]	0.735 ± 0.091	0.809 [0.64, 0.91]
HCP	73	3.256 ± 1.187	1011 ± 770 [76.167]	0.651 ± 0.090	0.754 [0.55, 0.89]
HCP	74	1.330 ± 0.880	1303 ± 604 [46.398]	0.746 ± 0.085	0.858 [0.73, 0.94]
HCP	75	2.730 ± 1.887	1685 ± 642 [38.102]	0.839 ± 0.112	0.681 [0.50, 0.83]
HCP	76	1.592 ± 1.050	1301 ± 585 [44.971]	0.782 ± 0.078	0.905 [0.80, 0.96]
HCP	77	2.891 ± 2.243	1156 ± 584 [50.481]	0.741 ± 0.104	0.688 [0.49, 0.84]
HCP	78	2.714 ± 1.399	1852 ± 955 [51.563]	0.773 ± 0.072	0.503 [0.29, 0.72]
HCP	79	2.278 ± 1.309	433 ± 185 [42.662]	0.643 ± 0.085	0.853 [0.70, 0.94]
HCP	80	2.272 ± 1.440	1387 ± 536 [38.639]	0.758 ± 0.068	0.895 [0.78, 0.96]
HCP	81	2.613 ± 1.289	1441 ± 971 [67.347]	0.697 ± 0.088	0.905 [0.80, 0.96]
HCP	82	2.798 ± 1.205	365 ± 177 [48.482]	0.610 ± 0.083	0.888 [0.78, 0.95]
HCP	83	1.485 ± 0.575	1499 ± 696 [46.462]	0.767 ± 0.082	0.895 [0.79, 0.95]
HCP	84	1.593 ± 0.558	726 ± 339 [46.751]	0.677 ± 0.123	0.916 [0.83, 0.96]
HCP	85	1.587 ± 0.754	401 ± 283 [70.462]	0.731 ± 0.108	0.887 [0.81, 0.95]
HCP	86	2.346 ± 2.231	1293 ± 482 [37.283]	0.839 ± 0.093	0.527 [0.31, 0.74]
HCP	87	1.780 ± 0.911	2038 ± 1040 [51.033]	0.809 ± 0.069	0.826 [0.66, 0.92]
HCP	88	3.620 ± 1.470	426 ± 274 [64.340]	0.592 ± 0.098	0.846 [0.74, 0.93]
HCP	89	1.622 ± 0.668	2068 ± 1212 [58.580]	0.772 ± 0.101	0.525 [0.30, 0.74]
HCP	90	2.067 ± 0.765	655 ± 237 [36.245]	0.720 ± 0.076	0.886 [0.79, 0.95]
HCP	91	2.540 ± 1.272	1201 ± 749 [62.420]	0.645 ± 0.080	0.722 [0.51, 0.87]
HCP	92	5.487 ± 2.418	1365 ± 886 [64.877]	0.702 ± 0.073	0.529 [0.33, 0.73]
HCP	93	1.876 ± 0.639	425 ± 217 [51.030]	0.635 ± 0.071	0.936 [0.88, 0.97]
HCP	94	3.179 ± 1.519	1557 ± 985 [63.236]	0.740 ± 0.088	0.503 [0.29, 0.72]
HCP	95	1.337 ± 0.506	408 ± 206 [50.381]	0.770 ± 0.068	0.962 [0.93, 0.98]
HCP	96	3.412 ± 1.723	231 ± 143 [61.885]	0.566 ± 0.117	0.899 [0.83, 0.95]
HCP	97	2.039 ± 1.003	1074 ± 500 [46.555]	0.633 ± 0.074	0.873 [0.76, 0.94]
HCP	98	1.798 ± 0.578	602 ± 300 [49.831]	0.640 ± 0.092	0.915 [0.84, 0.96]
HCP	99	2.556 ± 1.363	2356 ± 1230 [52.216]	0.703 ± 0.091	0.839 [0.68, 0.93]
HCP	100	2.318 ± 1.443	992 ± 556 [56.053]	0.743 ± 0.081	0.867 [0.72, 0.94]
HCP	101	3.978 ± 2.879	1092 ± 501 [45.840]	0.733 ± 0.102	0.427 [0.24, 0.65]
HCP	102	3.393 ± 1.096	576 ± 338 [58.633]	0.655 ± 0.069	0.906 [0.83, 0.96]
HCP	103	3.728 ± 1.706	398 ± 205 [51.582]	0.635 ± 0.101	0.862 [0.76, 0.93]
HCP	104	2.580 ± 1.818	2964 ± 1257 [42.413]	0.767 ± 0.094	0.852 [0.70, 0.93]
HCP	105	1.281 ± 0.697	3532 ± 565 [16.011]	0.936 ± 0.017	0.387 [0.19, 0.62]
HCP	106	2.586 ± 1.142	157 ± 70 [44.319]	0.496 ± 0.077	0.927 [0.87, 0.97]
HCP	107	2.506 ± 1.164	1134 ± 652 [57.533]	0.713 ± 0.100	0.353 [0.18, 0.58]
HCP	108	2.095 ± 0.709	281 ± 168 [59.802]	0.580 ± 0.079	0.939 [0.88, 0.97]
HCP	109	3.050 ± 1.382	350 ± 183 [52.311]	0.555 ± 0.118	0.902 [0.83, 0.95]
HCP	110	1.948 ± 0.791	887 ± 642 [72.392]	0.659 ± 0.103	0.848 [0.71, 0.93]
HCP	111	2.186 ± 0.959	572 ± 366 [63.871]	0.619 ± 0.122	0.729 [0.51, 0.87]
HCP	112	1.684 ± 0.917	1434 ± 690 [48.101]	0.810 ± 0.059	0.859 [0.73, 0.94]
HCP	113	4.411 ± 3.273	2351 ± 1013 [43.096]	0.677 ± 0.123	0.341 [0.17, 0.57]
HCP	114	2.831 ± 1.295	752 ± 625 [83.096]	0.653 ± 0.086	0.814 [0.64, 0.92]
HCP	115	2.656 ± 2.047	874 ± 390 [44.681]	0.637 ± 0.087	0.797 [0.63, 0.91]
HCP	116	2.546 ± 1.030	1054 ± 640 [60.730]	0.676 ± 0.077	0.877 [0.75, 0.95]
HCP	117	2.816 ± 1.328	3378 ± 2452 [72.580]	0.691 ± 0.104	0.835 [0.67, 0.93]
HCP	118	2.792 ± 2.118	4061 ± 1425 [35.102]	0.906 ± 0.044	0.626 [0.42, 0.80]
HCP	119	2.212 ± 1.056	485 ± 334 [68.895]	0.624 ± 0.098	0.800 [0.62, 0.91]
HCP	120	1.726 ± 0.651	743 ± 280 [37.693]	0.723 ± 0.062	0.931 [0.86, 0.97]
HCP	121	2.388 ± 1.304	588 ± 374 [63.578]	0.707 ± 0.090	0.927 [0.87, 0.97]
HCP	122	2.451 ± 1.251	700 ± 497 [71.098]	0.648 ± 0.103	0.907 [0.80, 0.96]
HCP	123	3.506 ± 2.062	849 ± 504 [59.412]	0.668 ± 0.086	0.791 [0.59, 0.91]
HCP	124	1.508 ± 0.946	1026 ± 541 [52.746]	0.877 ± 0.073	0.201 [0.09, 0.39]
HCP	125	2.240 ± 1.209	1145 ± 719 [62.829]	0.698 ± 0.094	0.811 [0.63, 0.91]
HCP	126	1.878 ± 0.967	416 ± 265 [63.734]	0.739 ± 0.107	0.940 [0.89, 0.97]
HCP	127	1.913 ± 1.083	1100 ± 437 [39.689]	0.897 ± 0.041	0.579 [0.37, 0.77]
HCP	128	2.929 ± 1.858	572 ± 284 [49.663]	0.680 ± 0.096	0.897 [0.82, 0.95]
HCP	129	2.705 ± 1.151	331 ± 169 [50.994]	0.555 ± 0.109	0.849 [0.73, 0.93]
HCP	130	1.451 ± 0.532	373 ± 234 [62.836]	0.739 ± 0.101	0.951 [0.91, 0.98]
HCP	131	1.709 ± 0.747	1937 ± 1046 [53.981]	0.785 ± 0.064	0.773 [0.59, 0.89]
HCP	132	2.790 ± 1.294	731 ± 405 [55.476]	0.651 ± 0.075	0.833 [0.69, 0.92]
HCP	133	3.103 ± 1.353	195 ± 113 [57.918]	0.555 ± 0.101	0.910 [0.83, 0.96]
HCP	134	2.511 ± 2.164	1171 ± 631 [53.900]	0.746 ± 0.100	0.736 [0.54, 0.87]
HCP	135	2.423 ± 1.303	603 ± 264 [43.761]	0.609 ± 0.092	0.868 [0.74, 0.94]
HCP	136	1.535 ± 0.515	854 ± 449 [52.626]	0.736 ± 0.083	0.917 [0.83, 0.96]
HCP	137	2.360 ± 0.650	1255 ± 730 [58.179]	0.675 ± 0.076	0.856 [0.72, 0.94]
HCP	138	2.716 ± 0.969	403 ± 210 [52.202]	0.662 ± 0.097	0.814 [0.68, 0.91]
HCP	139	1.880 ± 0.893	1758 ± 889 [50.594]	0.798 ± 0.080	0.238 [0.11, 0.44]
HCP	140	3.480 ± 1.286	245 ± 182 [73.943]	0.441 ± 0.120	0.905 [0.83, 0.96]
HCP	141	1.651 ± 0.401	655 ± 375 [57.195]	0.694 ± 0.072	0.869 [0.75, 0.94]
HCP	142	3.211 ± 1.590	943 ± 466 [49.429]	0.635 ± 0.075	0.773 [0.60, 0.89]
HCP	143	2.877 ± 1.654	981 ± 640 [65.286]	0.617 ± 0.133	0.546 [0.33, 0.75]
HCP	144	2.239 ± 1.104	975 ± 553 [56.701]	0.708 ± 0.095	0.801 [0.62, 0.91]
HCP	145	2.232 ± 1.191	370 ± 151 [40.709]	0.629 ± 0.075	0.851 [0.74, 0.93]
HCP	146	2.842 ± 1.007	205 ± 106 [51.869]	0.549 ± 0.087	0.678 [0.48, 0.84]
HCP	147	2.243 ± 0.856	427 ± 333 [78.095]	0.513 ± 0.111	0.797 [0.64, 0.90]
HCP	148	1.867 ± 1.133	968 ± 463 [47.835]	0.753 ± 0.108	0.816 [0.64, 0.92]
HCP	149	1.273 ± 0.395	751 ± 129 [17.107]	0.760 ± 0.040	0.941 [0.88, 0.97]
HCP	150	3.384 ± 1.867	1078 ± 722 [66.932]	0.614 ± 0.116	0.646 [0.42, 0.82]
HCP	151	2.546 ± 1.400	387 ± 176 [45.471]	0.566 ± 0.111	0.848 [0.73, 0.93]
HCP	152	1.215 ± 0.541	965 ± 434 [44.904]	0.889 ± 0.060	0.531 [0.34, 0.73]
HCP	153	3.020 ± 1.629	868 ± 742 [85.505]	0.553 ± 0.150	0.661 [0.44, 0.83]
HCP	154	2.634 ± 1.115	1053 ± 732 [69.494]	0.670 ± 0.091	0.856 [0.72, 0.94]
HCP	155	2.806 ± 2.450	2186 ± 1108 [50.685]	0.802 ± 0.124	0.290 [0.13, 0.51]
HCP	156	1.763 ± 1.186	1031 ± 575 [55.784]	0.730 ± 0.104	0.895 [0.80, 0.95]
HCP	157	2.057 ± 1.245	1433 ± 744 [51.962]	0.741 ± 0.066	0.818 [0.65, 0.92]
HCP	158	4.673 ± 3.222	2512 ± 1059 [42.171]	0.742 ± 0.091	0.338 [0.16, 0.57]
HCP	159	1.904 ± 1.134	1079 ± 440 [40.829]	0.670 ± 0.103	0.885 [0.77, 0.95]
HCP	160	2.358 ± 1.308	613 ± 378 [61.678]	0.610 ± 0.109	0.915 [0.83, 0.96]
HCP	161	1.479 ± 0.851	2293 ± 1275 [55.623]	0.897 ± 0.062	0.434 [0.26, 0.65]
HCP	162	2.191 ± 0.919	445 ± 247 [55.615]	0.740 ± 0.104	0.941 [0.89, 0.97]
HCP	163	1.091 ± 0.539	2180 ± 363 [16.626]	0.911 ± 0.011	0.449 [0.24, 0.67]
HCP	164	1.888 ± 0.579	1035 ± 658 [63.604]	0.745 ± 0.096	0.220 [0.10, 0.42]
HCP	165	1.742 ± 0.963	1306 ± 649 [49.720]	0.763 ± 0.068	0.836 [0.68, 0.93]
HCP	166	2.026 ± 0.929	564 ± 172 [30.594]	0.731 ± 0.042	0.928 [0.87, 0.97]
HCP	167	1.649 ± 1.068	1095 ± 475 [43.364]	0.744 ± 0.081	0.768 [0.57, 0.89]
HCP	168	3.178 ± 1.746	990 ± 626 [63.286]	0.613 ± 0.102	0.654 [0.44, 0.82]
HCP	169	1.219 ± 0.577	971 ± 362 [37.259]	0.749 ± 0.072	0.898 [0.79, 0.96]
HCP	170	1.535 ± 0.681	1031 ± 539 [52.276]	0.742 ± 0.101	0.888 [0.77, 0.95]
HCP	171	1.612 ± 0.529	854 ± 179 [20.945]	0.806 ± 0.027	0.913 [0.82, 0.96]
HCP	172	2.982 ± 0.847	89 ± 57 [63.545]	0.338 ± 0.094	0.556 [0.40, 0.74]
HCP	173	1.487 ± 1.099	1875 ± 963 [51.349]	0.787 ± 0.081	0.679 [0.46, 0.84]
HCP	174	2.806 ± 1.685	817 ± 310 [37.963]	0.753 ± 0.071	0.930 [0.86, 0.97]
HCP	175	2.503 ± 0.987	962 ± 623 [64.717]	0.696 ± 0.080	0.800 [0.60, 0.91]
HCP	176	1.273 ± 0.740	1044 ± 417 [39.919]	0.799 ± 0.078	0.835 [0.69, 0.92]
HCP	177	1.419 ± 0.643	1000 ± 352 [35.239]	0.739 ± 0.060	0.914 [0.83, 0.96]
HCP	178	2.179 ± 1.411	604 ± 342 [56.576]	0.593 ± 0.164	0.896 [0.81, 0.95]
HCP	179	1.624 ± 0.983	1956 ± 774 [39.547]	0.765 ± 0.087	0.920 [0.83, 0.97]
HCP	180	2.502 ± 1.186	575 ± 443 [77.102]	0.630 ± 0.103	0.796 [0.62, 0.91]
HCP	181	2.230 ± 0.975	999 ± 725 [72.539]	0.766 ± 0.082	0.880 [0.75, 0.95]
HCP	182	2.600 ± 1.404	772 ± 469 [60.816]	0.590 ± 0.087	0.801 [0.62, 0.91]
HCP	183	1.938 ± 1.691	1416 ± 774 [54.675]	0.737 ± 0.139	0.269 [0.13, 0.48]
HCP	184	1.698 ± 0.903	2142 ± 788 [36.802]	0.822 ± 0.069	0.338 [0.17, 0.56]
HCP	185	1.009 ± 0.243	1483 ± 483 [32.582]	0.788 ± 0.073	0.799 [0.62, 0.91]
HCP	186	1.706 ± 0.700	397 ± 241 [60.787]	0.713 ± 0.090	0.958 [0.92, 0.98]
HCP	187	2.217 ± 1.570	1103 ± 592 [53.675]	0.697 ± 0.096	0.727 [0.53, 0.87]
HCP	188	2.827 ± 1.537	1206 ± 528 [43.756]	0.641 ± 0.082	0.848 [0.69, 0.93]
HCP	189	2.120 ± 1.430	1429 ± 425 [29.775]	0.779 ± 0.089	0.552 [0.32, 0.76]
HCP	190	3.237 ± 1.157	345 ± 218 [63.250]	0.614 ± 0.084	0.940 [0.89, 0.97]
HCP	191	2.442 ± 1.185	1202 ± 932 [77.552]	0.640 ± 0.092	0.881 [0.77, 0.95]
HCP	192	3.307 ± 1.043	446 ± 340 [76.417]	0.541 ± 0.109	0.814 [0.65, 0.91]
HCP	193	1.764 ± 0.861	1599 ± 741 [46.367]	0.731 ± 0.075	0.838 [0.68, 0.93]
HCP	194	1.807 ± 1.078	1129 ± 514 [45.519]	0.885 ± 0.061	0.350 [0.18, 0.57]
HCP	195	2.788 ± 1.584	1396 ± 823 [58.988]	0.716 ± 0.084	0.818 [0.64, 0.92]
HCP	196	3.114 ± 1.774	2528 ± 1251 [49.486]	0.820 ± 0.085	0.392 [0.20, 0.62]
HCP	197	2.240 ± 0.455	51 ± 26 [52.431]	0.264 ± 0.069	0.525 [0.36, 0.71]
HCP	198	2.278 ± 1.501	1537 ± 883 [57.472]	0.725 ± 0.105	0.665 [0.43, 0.84]
HCP	199	2.350 ± 1.657	1454 ± 683 [46.987]	0.654 ± 0.096	0.839 [0.72, 0.92]
HCP	200	1.962 ± 1.131	1647 ± 717 [43.546]	0.672 ± 0.078	0.877 [0.76, 0.94]
HCP	201	1.336 ± 1.028	1631 ± 650 [39.854]	0.757 ± 0.067	0.882 [0.77, 0.95]
HCP	202	1.997 ± 0.635	296 ± 177 [59.715]	0.749 ± 0.061	0.940 [0.89, 0.97]
HCP	203	2.961 ± 1.561	759 ± 420 [55.247]	0.581 ± 0.111	0.730 [0.51, 0.87]
HCP	204	3.764 ± 2.197	1628 ± 1025 [62.945]	0.745 ± 0.134	0.323 [0.16, 0.55]
HCP	205	3.251 ± 1.224	333 ± 187 [56.133]	0.560 ± 0.105	0.874 [0.78, 0.94]
HCP	206	1.613 ± 0.376	759 ± 510 [67.185]	0.783 ± 0.083	0.575 [0.36, 0.77]
HCP	207	1.569 ± 0.669	807 ± 305 [37.851]	0.741 ± 0.079	0.891 [0.78, 0.95]
HCP	208	3.110 ± 1.963	869 ± 343 [39.429]	0.839 ± 0.045	0.902 [0.83, 0.95]
HCP	209	3.137 ± 1.424	978 ± 701 [71.631]	0.717 ± 0.079	0.792 [0.62, 0.90]
HCP	210	2.269 ± 1.139	235 ± 113 [47.941]	0.615 ± 0.086	0.792 [0.67, 0.89]
HCP	211	2.054 ± 0.707	615 ± 441 [71.603]	0.594 ± 0.082	0.710 [0.50, 0.86]
HCP	212	2.515 ± 1.281	863 ± 556 [64.421]	0.615 ± 0.117	0.896 [0.80, 0.95]
HCP	213	2.562 ± 1.135	68 ± 59 [85.653]	0.332 ± 0.132	0.434 [0.28, 0.64]
HCP	214	1.759 ± 0.681	492 ± 314 [63.951]	0.677 ± 0.103	0.888 [0.77, 0.95]
HCP	215	4.767 ± 2.919	1499 ± 992 [66.202]	0.669 ± 0.144	0.332 [0.16, 0.56]
HCP	216	2.413 ± 1.688	1023 ± 486 [47.506]	0.710 ± 0.096	0.758 [0.56, 0.89]
HCP	217	2.061 ± 0.955	785 ± 284 [36.249]	0.740 ± 0.059	0.822 [0.65, 0.92]
HCP	218	1.379 ± 0.364	1109 ± 352 [31.733]	0.767 ± 0.054	0.875 [0.75, 0.94]
HCP	219	3.049 ± 1.594	1137 ± 689 [60.617]	0.652 ± 0.113	0.515 [0.29, 0.73]
HCP	220	2.366 ± 0.935	438 ± 250 [57.071]	0.624 ± 0.075	0.914 [0.84, 0.96]
HCP	221	1.262 ± 0.690	2121 ± 604 [28.466]	0.858 ± 0.047	0.702 [0.49, 0.85]
HCP	222	2.033 ± 0.806	392 ± 278 [71.029]	0.578 ± 0.116	0.875 [0.77, 0.94]
HCP	223	1.955 ± 0.612	297 ± 177 [59.515]	0.586 ± 0.078	0.933 [0.87, 0.97]
HCP	224	1.692 ± 0.861	1005 ± 463 [46.080]	0.679 ± 0.084	0.885 [0.77, 0.95]
HCP	225	2.987 ± 1.440	683 ± 467 [68.376]	0.637 ± 0.097	0.797 [0.63, 0.91]
HCP	226	1.368 ± 0.667	1180 ± 323 [27.373]	0.903 ± 0.054	0.472 [0.27, 0.69]
HCP	227	2.259 ± 1.204	474 ± 241 [50.965]	0.627 ± 0.094	0.875 [0.78, 0.94]
HCP	228	3.672 ± 1.792	404 ± 188 [46.510]	0.576 ± 0.089	0.889 [0.80, 0.95]
HCP	229	2.018 ± 0.859	312 ± 220 [70.491]	0.598 ± 0.120	0.847 [0.71, 0.93]
HCP	230	2.157 ± 0.905	291 ± 181 [62.363]	0.607 ± 0.108	0.858 [0.76, 0.93]
HCP	231	2.337 ± 1.571	1520 ± 705 [46.362]	0.788 ± 0.085	0.573 [0.35, 0.77]
HCP	232	1.764 ± 0.743	779 ± 205 [26.303]	0.756 ± 0.053	0.906 [0.81, 0.96]
HCP	233	2.255 ± 1.495	1240 ± 694 [55.974]	0.730 ± 0.091	0.704 [0.48, 0.86]
HCP	234	1.389 ± 0.382	899 ± 180 [20.026]	0.760 ± 0.035	0.890 [0.79, 0.95]
HCP	235	2.407 ± 1.296	267 ± 100 [37.421]	0.581 ± 0.089	0.885 [0.78, 0.95]
HCP	236	1.075 ± 0.536	810 ± 344 [42.482]	0.860 ± 0.104	0.442 [0.25, 0.66]
HCP	237	3.300 ± 1.698	240 ± 97 [40.542]	0.603 ± 0.074	0.918 [0.85, 0.96]
HCP	238	2.158 ± 1.200	730 ± 406 [55.572]	0.698 ± 0.087	0.417 [0.22, 0.64]
HCP	239	2.365 ± 0.890	416 ± 126 [30.227]	0.621 ± 0.050	0.853 [0.72, 0.93]
HCP	240	6.611 ± 2.734	844 ± 593 [70.282]	0.658 ± 0.098	0.389 [0.20, 0.62]
HCP	241	1.729 ± 0.761	1129 ± 578 [51.186]	0.726 ± 0.088	0.861 [0.72, 0.94]
HCP	242	2.956 ± 2.249	1735 ± 707 [40.731]	0.861 ± 0.083	0.525 [0.31, 0.73]
HCP	243	2.859 ± 1.307	482 ± 246 [51.042]	0.608 ± 0.113	0.898 [0.81, 0.95]
HCP	244	3.440 ± 1.931	1160 ± 697 [60.078]	0.646 ± 0.126	0.770 [0.58, 0.89]
HCP	245	3.036 ± 1.043	895 ± 695 [77.613]	0.547 ± 0.121	0.817 [0.67, 0.91]
HCP	246	2.292 ± 1.155	2053 ± 804 [39.181]	0.771 ± 0.085	0.462 [0.26, 0.68]
HCP	247	2.150 ± 1.122	706 ± 385 [54.543]	0.671 ± 0.097	0.847 [0.70, 0.93]
HCP	248	2.434 ± 1.448	2130 ± 980 [46.008]	0.772 ± 0.081	0.554 [0.33, 0.76]
HCP	249	1.619 ± 0.783	1673 ± 1039 [62.118]	0.799 ± 0.075	0.302 [0.16, 0.52]
HCP	250	2.268 ± 1.384	546 ± 123 [22.523]	0.651 ± 0.041	0.837 [0.69, 0.93]
HCP	251	3.025 ± 1.941	1868 ± 1168 [62.543]	0.645 ± 0.095	0.864 [0.73, 0.94]
HCP	252	1.482 ± 0.899	1180 ± 616 [52.246]	0.860 ± 0.082	0.416 [0.23, 0.64]
HCP	253	1.797 ± 1.408	732 ± 282 [38.512]	0.677 ± 0.089	0.866 [0.73, 0.94]
HCP	254	1.882 ± 0.756	244 ± 138 [56.317]	0.721 ± 0.072	0.904 [0.83, 0.95]
HCP	255	1.435 ± 0.536	372 ± 188 [50.540]	0.781 ± 0.101	0.598 [0.40, 0.78]
HCP	256	2.504 ± 1.422	1361 ± 765 [56.202]	0.802 ± 0.050	0.831 [0.70, 0.92]
HCP	257	2.133 ± 1.052	470 ± 246 [52.362]	0.602 ± 0.087	0.885 [0.77, 0.95]
HCP	258	2.039 ± 0.814	400 ± 269 [67.314]	0.685 ± 0.101	0.747 [0.59, 0.87]
HCP	259	2.197 ± 1.974	1482 ± 789 [53.216]	0.738 ± 0.085	0.719 [0.51, 0.86]
HCP	260	2.225 ± 1.693	2030 ± 895 [44.090]	0.825 ± 0.088	0.210 [0.10, 0.40]
HCP	261	1.994 ± 0.934	892 ± 428 [47.976]	0.681 ± 0.093	0.821 [0.65, 0.92]
HCP	262	1.914 ± 0.795	369 ± 226 [61.309]	0.665 ± 0.109	0.847 [0.73, 0.93]
HCP	263	2.409 ± 0.855	626 ± 341 [54.481]	0.643 ± 0.095	0.939 [0.88, 0.97]
HCP	264	2.657 ± 0.878	348 ± 159 [45.575]	0.600 ± 0.070	0.834 [0.68, 0.92]
HCP	265	2.629 ± 2.174	636 ± 260 [40.955]	0.575 ± 0.085	0.862 [0.73, 0.94]
HCP	266	5.930 ± 2.297	792 ± 546 [68.900]	0.617 ± 0.083	0.269 [0.12, 0.49]
HCP	267	2.691 ± 1.404	643 ± 358 [55.744]	0.681 ± 0.098	0.881 [0.78, 0.94]
HCP	268	3.241 ± 2.250	903 ± 481 [53.212]	0.710 ± 0.105	0.518 [0.29, 0.73]
HCP	269	2.682 ± 1.636	1063 ± 728 [68.442]	0.613 ± 0.099	0.722 [0.51, 0.87]
HCP	270	3.813 ± 1.917	945 ± 685 [72.521]	0.559 ± 0.124	0.704 [0.49, 0.86]
HCP	271	1.849 ± 0.854	298 ± 163 [54.666]	0.613 ± 0.118	0.905 [0.83, 0.96]
HCP	272	2.165 ± 0.883	1106 ± 386 [34.946]	0.725 ± 0.060	0.858 [0.73, 0.94]
HCP	273	2.039 ± 0.966	719 ± 392 [54.456]	0.833 ± 0.076	0.537 [0.33, 0.74]
HCP	274	2.099 ± 1.452	897 ± 473 [52.772]	0.669 ± 0.110	0.829 [0.68, 0.92]
HCP	275	1.827 ± 0.816	685 ± 404 [58.893]	0.722 ± 0.129	0.915 [0.85, 0.96]
HCP	276	3.293 ± 1.698	1756 ± 1039 [59.172]	0.663 ± 0.108	0.846 [0.69, 0.93]
HCP	277	2.068 ± 1.176	1186 ± 863 [72.728]	0.725 ± 0.103	0.842 [0.69, 0.93]
HCP	278	1.350 ± 0.861	1665 ± 759 [45.604]	0.802 ± 0.092	0.716 [0.53, 0.86]
HCP	279	3.672 ± 0.866	717 ± 573 [79.918]	0.639 ± 0.072	0.648 [0.42, 0.82]
HCP	280	1.597 ± 1.025	1918 ± 681 [35.499]	0.809 ± 0.049	0.848 [0.70, 0.93]
HCP	281	1.595 ± 0.747	1530 ± 891 [58.220]	0.865 ± 0.051	0.559 [0.36, 0.75]
HCP	282	2.234 ± 1.217	784 ± 421 [53.688]	0.732 ± 0.108	0.902 [0.83, 0.95]
HCP	283	5.125 ± 1.642	820 ± 669 [81.589]	0.523 ± 0.127	0.582 [0.35, 0.78]
HCP	284	2.025 ± 1.082	475 ± 198 [41.698]	0.720 ± 0.079	0.927 [0.86, 0.97]
HCP	285	2.021 ± 0.674	792 ± 394 [49.778]	0.696 ± 0.070	0.911 [0.82, 0.96]
HCP	286	2.311 ± 0.984	571 ± 401 [70.177]	0.611 ± 0.081	0.883 [0.77, 0.95]
HCP	287	2.267 ± 1.495	393 ± 205 [52.096]	0.580 ± 0.101	0.908 [0.83, 0.96]
HCP	288	2.832 ± 1.408	586 ± 313 [53.458]	0.640 ± 0.095	0.838 [0.72, 0.92]
HCP	289	1.403 ± 0.547	584 ± 269 [46.077]	0.698 ± 0.065	0.900 [0.80, 0.96]
HCP	290	4.567 ± 2.698	2196 ± 1208 [54.993]	0.783 ± 0.141	0.277 [0.13, 0.49]
HCP	291	2.070 ± 0.766	192 ± 112 [58.409]	0.619 ± 0.097	0.938 [0.89, 0.97]
HCP	292	1.839 ± 0.834	433 ± 256 [58.966]	0.743 ± 0.083	0.957 [0.92, 0.98]
HCP	293	2.529 ± 1.435	875 ± 572 [65.385]	0.676 ± 0.117	0.663 [0.45, 0.83]
HCP	294	2.563 ± 0.839	475 ± 302 [63.502]	0.601 ± 0.104	0.904 [0.82, 0.96]
HCP	295	2.953 ± 1.253	880 ± 440 [50.005]	0.729 ± 0.073	0.909 [0.83, 0.96]
HCP	296	1.262 ± 0.783	959 ± 436 [45.500]	0.775 ± 0.086	0.834 [0.70, 0.92]
HCP	297	1.228 ± 0.432	716 ± 260 [36.286]	0.806 ± 0.083	0.943 [0.89, 0.97]
HCP	298	2.476 ± 1.922	2542 ± 1196 [47.030]	0.872 ± 0.058	0.369 [0.18, 0.60]
HCP	299	2.061 ± 1.782	2047 ± 685 [33.455]	0.795 ± 0.082	0.726 [0.53, 0.87]
HCP	300	2.893 ± 1.013	321 ± 160 [49.951]	0.652 ± 0.101	0.640 [0.46, 0.81]
HCP	301	2.427 ± 1.139	262 ± 157 [60.013]	0.556 ± 0.133	0.922 [0.86, 0.96]
HCP	302	1.879 ± 0.758	884 ± 557 [62.970]	0.663 ± 0.102	0.645 [0.43, 0.82]
HCP	303	1.858 ± 1.207	779 ± 320 [41.116]	0.660 ± 0.092	0.865 [0.76, 0.94]
HCP	304	7.367 ± 5.457	926 ± 500 [53.972]	0.553 ± 0.140	0.097 [0.04, 0.22]
HCP	305	1.502 ± 0.768	856 ± 440 [51.332]	0.700 ± 0.094	0.932 [0.87, 0.97]
HCP	306	2.707 ± 1.426	1332 ± 901 [67.673]	0.626 ± 0.115	0.468 [0.25, 0.69]
HCP	307	4.168 ± 1.927	263 ± 120 [45.777]	0.549 ± 0.071	0.787 [0.65, 0.89]
HCP	308	1.817 ± 1.445	739 ± 234 [31.671]	0.748 ± 0.121	0.524 [0.31, 0.73]
HCP	309	1.655 ± 0.580	439 ± 87 [19.901]	0.693 ± 0.037	0.938 [0.89, 0.97]
HCP	310	2.799 ± 0.967	169 ± 108 [64.251]	0.445 ± 0.098	0.876 [0.79, 0.94]
HCP	311	2.959 ± 1.974	671 ± 308 [45.944]	0.715 ± 0.119	0.609 [0.39, 0.80]
HCP	312	1.381 ± 0.600	689 ± 303 [43.995]	0.723 ± 0.082	0.875 [0.76, 0.94]
HCP	313	2.036 ± 0.501	314 ± 152 [48.261]	0.570 ± 0.089	0.943 [0.89, 0.97]
HCP	314	1.528 ± 0.568	368 ± 155 [42.219]	0.731 ± 0.072	0.961 [0.93, 0.98]
HCP	315	1.800 ± 1.045	1121 ± 577 [51.425]	0.692 ± 0.091	0.563 [0.33, 0.77]
HCP	316	1.744 ± 0.878	968 ± 422 [43.562]	0.680 ± 0.073	0.820 [0.66, 0.92]
HCP	317	3.428 ± 2.754	1701 ± 995 [58.498]	0.654 ± 0.117	0.469 [0.25, 0.69]
HCP	318	3.648 ± 1.780	313 ± 179 [57.167]	0.474 ± 0.115	0.863 [0.75, 0.94]
HCP	319	1.855 ± 1.098	1310 ± 748 [57.118]	0.724 ± 0.092	0.871 [0.74, 0.94]
HCP	320	1.845 ± 0.941	534 ± 343 [64.359]	0.604 ± 0.121	0.767 [0.60, 0.89]
HCP	321	2.397 ± 1.282	362 ± 151 [41.865]	0.622 ± 0.089	0.882 [0.79, 0.94]
HCP	322	1.815 ± 0.880	447 ± 288 [64.419]	0.650 ± 0.101	0.778 [0.59, 0.90]
HCP	323	2.000 ± 1.295	3991 ± 2135 [53.508]	0.846 ± 0.081	0.297 [0.14, 0.52]
HCP	324	2.292 ± 1.263	791 ± 432 [54.647]	0.645 ± 0.129	0.904 [0.82, 0.96]
HCP	325	2.743 ± 1.452	479 ± 206 [43.041]	0.645 ± 0.062	0.922 [0.84, 0.97]
HCP	326	2.023 ± 0.419	499 ± 258 [51.738]	0.619 ± 0.092	0.926 [0.86, 0.97]
HCP	327	3.677 ± 3.429	4118 ± 1859 [45.149]	0.887 ± 0.075	0.490 [0.26, 0.71]
HCP	328	2.312 ± 0.760	371 ± 243 [65.397]	0.582 ± 0.091	0.640 [0.42, 0.82]
HCP	329	3.274 ± 1.399	364 ± 208 [57.094]	0.640 ± 0.088	0.920 [0.86, 0.96]
HCP	330	2.722 ± 2.180	627 ± 285 [45.494]	0.680 ± 0.101	0.881 [0.79, 0.94]
HCP	331	1.280 ± 0.475	931 ± 443 [47.626]	0.832 ± 0.065	0.810 [0.63, 0.91]
HCP	332	1.960 ± 1.149	1969 ± 981 [49.839]	0.718 ± 0.112	0.784 [0.59, 0.90]
HCP	333	2.494 ± 1.106	537 ± 231 [43.005]	0.675 ± 0.089	0.902 [0.82, 0.96]
HCP	334	1.626 ± 0.690	254 ± 131 [51.625]	0.737 ± 0.080	0.938 [0.88, 0.97]
HCP	335	1.661 ± 0.706	786 ± 390 [49.574]	0.797 ± 0.073	0.873 [0.74, 0.94]
HCP	336	3.345 ± 0.990	103 ± 71 [68.753]	0.323 ± 0.092	0.392 [0.23, 0.61]
HCP	337	1.806 ± 0.984	778 ± 395 [50.761]	0.635 ± 0.087	0.869 [0.75, 0.94]
HCP	338	2.160 ± 1.293	714 ± 473 [66.274]	0.617 ± 0.115	0.837 [0.69, 0.93]
HCP	339	2.710 ± 1.172	293 ± 155 [52.928]	0.599 ± 0.105	0.943 [0.90, 0.97]
HCP	340	1.673 ± 1.217	685 ± 302 [44.006]	0.709 ± 0.091	0.729 [0.52, 0.87]
HCP	341	2.593 ± 1.255	952 ± 782 [82.197]	0.590 ± 0.143	0.695 [0.50, 0.85]
HCP	342	4.095 ± 2.126	292 ± 148 [50.781]	0.517 ± 0.108	0.925 [0.86, 0.97]
HCP	343	1.629 ± 0.579	425 ± 188 [44.081]	0.715 ± 0.090	0.957 [0.92, 0.98]
HCP	344	1.914 ± 0.613	1068 ± 474 [44.423]	0.687 ± 0.070	0.840 [0.69, 0.93]
HCP	345	3.490 ± 2.352	1534 ± 376 [24.512]	0.843 ± 0.032	0.650 [0.44, 0.82]
HCP	346	3.305 ± 2.164	662 ± 315 [47.553]	0.684 ± 0.095	0.822 [0.70, 0.91]
HCP	347	1.519 ± 0.867	662 ± 337 [50.815]	0.662 ± 0.113	0.833 [0.70, 0.92]
HCP	348	1.687 ± 0.925	906 ± 478 [52.743]	0.830 ± 0.065	0.653 [0.47, 0.82]
HCP	349	2.186 ± 1.166	803 ± 425 [52.943]	0.699 ± 0.117	0.665 [0.44, 0.83]
HCP	350	2.917 ± 1.102	211 ± 79 [37.595]	0.476 ± 0.077	0.499 [0.30, 0.71]
HCP	351	3.240 ± 1.843	1464 ± 953 [65.090]	0.626 ± 0.176	0.188 [0.08, 0.37]
HCP	352	2.698 ± 0.969	257 ± 170 [66.305]	0.539 ± 0.094	0.914 [0.83, 0.96]
HCP	353	5.958 ± 3.289	434 ± 251 [57.882]	0.450 ± 0.099	0.559 [0.32, 0.77]
HCP	354	1.961 ± 1.351	1652 ± 907 [54.908]	0.751 ± 0.090	0.623 [0.40, 0.81]
HCP	355	3.311 ± 2.469	313 ± 194 [62.021]	0.495 ± 0.148	0.816 [0.66, 0.91]
HCP	356	2.000 ± 1.115	1891 ± 921 [48.681]	0.729 ± 0.084	0.853 [0.71, 0.93]
HCP	357	2.097 ± 0.876	254 ± 148 [58.147]	0.534 ± 0.091	0.834 [0.69, 0.92]
HCP	358	3.457 ± 1.561	638 ± 394 [61.709]	0.624 ± 0.103	0.814 [0.67, 0.91]
HCP	359	3.492 ± 1.669	589 ± 361 [61.275]	0.658 ± 0.138	0.806 [0.64, 0.91]
HCP	360	3.398 ± 1.540	698 ± 455 [65.251]	0.645 ± 0.103	0.696 [0.47, 0.85]
HCP	361	1.347 ± 0.448	463 ± 164 [35.417]	0.803 ± 0.057	0.957 [0.91, 0.98]
HCP	362	2.347 ± 1.202	573 ± 223 [38.972]	0.625 ± 0.064	0.827 [0.67, 0.92]
HCP	363	1.739 ± 0.677	650 ± 347 [53.395]	0.641 ± 0.074	0.916 [0.85, 0.96]
HCP	364	3.274 ± 1.146	214 ± 97 [45.498]	0.535 ± 0.084	0.896 [0.79, 0.95]
HCP	365	2.793 ± 1.412	569 ± 444 [77.986]	0.578 ± 0.117	0.761 [0.58, 0.89]
HCP	366	2.847 ± 1.254	118 ± 64 [54.464]	0.440 ± 0.082	0.785 [0.66, 0.89]
HCP	367	2.541 ± 1.488	1237 ± 674 [54.453]	0.749 ± 0.071	0.840 [0.69, 0.93]
HCP	368	2.867 ± 1.638	1131 ± 616 [54.458]	0.675 ± 0.118	0.706 [0.49, 0.86]
HCP	369	3.543 ± 1.731	118 ± 60 [50.940]	0.384 ± 0.075	0.889 [0.80, 0.95]
HCP	370	3.057 ± 1.421	286 ± 179 [62.469]	0.629 ± 0.128	0.921 [0.86, 0.96]
HCP	371	3.122 ± 2.023	557 ± 331 [59.474]	0.646 ± 0.134	0.883 [0.79, 0.94]
HCP	372	2.981 ± 0.829	619 ± 419 [67.712]	0.676 ± 0.123	0.775 [0.59, 0.89]
HCP	373	2.205 ± 0.957	789 ± 524 [66.466]	0.746 ± 0.110	0.869 [0.76, 0.94]
HCP	374	1.537 ± 0.846	609 ± 289 [47.362]	0.663 ± 0.104	0.913 [0.84, 0.96]
HCP	375	1.701 ± 0.798	855 ± 427 [49.925]	0.670 ± 0.104	0.880 [0.76, 0.95]
HCP	376	1.499 ± 0.561	853 ± 386 [45.263]	0.734 ± 0.090	0.767 [0.58, 0.89]
HCP	377	2.452 ± 1.904	1699 ± 819 [48.173]	0.699 ± 0.085	0.877 [0.76, 0.94]
HCP	378	2.838 ± 1.825	1294 ± 810 [62.572]	0.636 ± 0.104	0.491 [0.27, 0.71]
HCP	379	1.747 ± 0.908	1013 ± 529 [52.242]	0.840 ± 0.087	0.426 [0.23, 0.65]
HCP	380	2.130 ± 0.828	192 ± 123 [64.060]	0.512 ± 0.098	0.914 [0.84, 0.96]
HCP	381	2.981 ± 1.563	368 ± 164 [44.482]	0.601 ± 0.104	0.848 [0.73, 0.93]
HCP	382	1.392 ± 0.624	1392 ± 554 [39.810]	0.776 ± 0.070	0.889 [0.78, 0.95]
HCP	383	2.641 ± 1.272	610 ± 478 [78.389]	0.648 ± 0.129	0.740 [0.55, 0.87]
HCP	384	3.441 ± 1.574	445 ± 335 [75.200]	0.539 ± 0.101	0.675 [0.46, 0.84]
HCP	385	1.597 ± 0.914	1313 ± 601 [45.782]	0.837 ± 0.079	0.210 [0.10, 0.40]
HCP	386	1.865 ± 0.673	416 ± 225 [54.141]	0.580 ± 0.118	0.903 [0.82, 0.96]
HCP	387	1.952 ± 1.197	840 ± 623 [74.156]	0.669 ± 0.146	0.791 [0.62, 0.90]
HCP	388	2.404 ± 1.729	1909 ± 897 [46.998]	0.742 ± 0.084	0.790 [0.61, 0.90]
HCP	389	3.596 ± 2.823	1406 ± 741 [52.718]	0.707 ± 0.094	0.553 [0.32, 0.76]
HCP	390	2.391 ± 1.121	283 ± 138 [48.935]	0.558 ± 0.107	0.913 [0.83, 0.96]
HCP	391	2.440 ± 1.174	1236 ± 660 [53.424]	0.696 ± 0.096	0.391 [0.20, 0.62]
HCP	392	2.309 ± 1.179	817 ± 378 [46.231]	0.718 ± 0.061	0.279 [0.13, 0.49]
HCP	393	3.434 ± 2.851	468 ± 233 [49.706]	0.568 ± 0.102	0.888 [0.80, 0.95]
HCP	394	2.870 ± 1.441	491 ± 271 [55.249]	0.657 ± 0.103	0.923 [0.85, 0.96]
HCP	395	2.680 ± 1.218	402 ± 148 [36.685]	0.611 ± 0.066	0.883 [0.77, 0.95]
HCP	396	2.444 ± 1.063	560 ± 283 [50.519]	0.785 ± 0.128	0.339 [0.17, 0.56]
HCP	397	3.795 ± 1.967	385 ± 162 [42.019]	0.610 ± 0.092	0.750 [0.60, 0.87]
HCP	398	1.755 ± 1.045	679 ± 331 [48.720]	0.656 ± 0.100	0.887 [0.78, 0.95]
HCP	399	2.237 ± 0.950	858 ± 657 [76.671]	0.701 ± 0.095	0.639 [0.43, 0.81]
HCP	400	1.952 ± 0.599	298 ± 135 [45.123]	0.651 ± 0.095	0.945 [0.90, 0.97]
HCP	401	2.562 ± 1.340	960 ± 721 [75.101]	0.600 ± 0.144	0.795 [0.61, 0.91]
HCP	402	2.474 ± 0.837	226 ± 128 [56.570]	0.638 ± 0.114	0.937 [0.89, 0.97]
HCP	403	2.186 ± 1.246	516 ± 266 [51.569]	0.704 ± 0.090	0.934 [0.87, 0.97]
HCP	404	3.454 ± 2.177	4323 ± 1988 [45.976]	0.832 ± 0.081	0.047 [0.02, 0.12]
HCP	405	1.730 ± 0.609	959 ± 436 [45.411]	0.684 ± 0.112	0.873 [0.75, 0.94]
HCP	406	2.866 ± 1.094	184 ± 90 [49.056]	0.428 ± 0.086	0.885 [0.79, 0.95]
HCP	407	2.857 ± 2.548	947 ± 394 [41.631]	0.636 ± 0.091	0.708 [0.51, 0.86]
HCP	408	3.028 ± 1.389	123 ± 69 [56.626]	0.532 ± 0.098	0.906 [0.83, 0.96]
HCP	409	1.637 ± 1.118	2128 ± 953 [44.797]	0.711 ± 0.104	0.854 [0.70, 0.94]
HCP	410	3.573 ± 2.145	449 ± 194 [43.344]	0.635 ± 0.085	0.873 [0.74, 0.94]
HCP	411	2.847 ± 1.149	192 ± 102 [53.297]	0.616 ± 0.090	0.859 [0.77, 0.93]
HCP	412	1.414 ± 0.697	1096 ± 400 [36.459]	0.763 ± 0.039	0.862 [0.73, 0.94]
HCP	413	3.254 ± 2.524	1654 ± 904 [54.681]	0.625 ± 0.106	0.764 [0.56, 0.89]
HCP	414	1.422 ± 0.795	1262 ± 667 [52.843]	0.754 ± 0.094	0.900 [0.83, 0.95]
HCP	415	1.689 ± 1.335	1001 ± 395 [39.457]	0.727 ± 0.085	0.874 [0.76, 0.94]
HCP	416	2.065 ± 1.605	699 ± 306 [43.727]	0.619 ± 0.104	0.818 [0.69, 0.91]
HCP	417	3.616 ± 2.138	1318 ± 749 [56.874]	0.669 ± 0.117	0.728 [0.51, 0.87]
HCP	418	1.233 ± 0.492	301 ± 171 [56.941]	0.772 ± 0.072	0.963 [0.93, 0.98]
HCP	419	2.659 ± 0.922	813 ± 562 [69.173]	0.620 ± 0.104	0.876 [0.77, 0.94]
HCP	420	3.512 ± 1.782	474 ± 226 [47.777]	0.636 ± 0.070	0.388 [0.19, 0.62]
HCP	421	3.006 ± 2.196	290 ± 106 [36.603]	0.552 ± 0.085	0.892 [0.80, 0.95]
HCP	422	1.702 ± 0.827	699 ± 453 [64.848]	0.701 ± 0.085	0.718 [0.52, 0.86]
HCP	423	3.343 ± 1.815	601 ± 406 [67.485]	0.575 ± 0.108	0.733 [0.53, 0.87]
HCP	424	1.692 ± 0.745	657 ± 292 [44.468]	0.672 ± 0.115	0.875 [0.75, 0.95]
HCP	425	1.703 ± 1.673	586 ± 234 [39.929]	0.740 ± 0.085	0.862 [0.72, 0.94]
HCP	426	3.348 ± 1.117	715 ± 543 [75.985]	0.599 ± 0.119	0.593 [0.37, 0.79]
HCP	427	3.584 ± 2.460	1243 ± 570 [45.891]	0.669 ± 0.094	0.364 [0.18, 0.59]
HCP	428	2.413 ± 1.018	446 ± 309 [69.252]	0.550 ± 0.135	0.821 [0.66, 0.92]
HCP	429	2.666 ± 1.645	1038 ± 596 [57.351]	0.682 ± 0.105	0.770 [0.57, 0.89]
HCP	430	3.045 ± 1.220	181 ± 122 [67.813]	0.569 ± 0.130	0.846 [0.75, 0.92]
HCP	431	2.160 ± 0.790	103 ± 59 [56.991]	0.462 ± 0.087	0.886 [0.79, 0.95]
HCP	432	1.537 ± 0.853	899 ± 521 [57.985]	0.756 ± 0.103	0.937 [0.88, 0.97]
HCP	433	1.611 ± 0.732	1041 ± 466 [44.735]	0.719 ± 0.073	0.818 [0.65, 0.92]
HCP	434	1.674 ± 0.677	398 ± 174 [43.884]	0.763 ± 0.105	0.963 [0.93, 0.98]
HCP	435	2.717 ± 1.376	392 ± 182 [46.479]	0.556 ± 0.084	0.853 [0.73, 0.93]
HCP	436	2.011 ± 0.939	2669 ± 1821 [68.227]	0.771 ± 0.100	0.390 [0.22, 0.61]
HCP	437	2.002 ± 0.590	263 ± 170 [64.656]	0.559 ± 0.102	0.899 [0.81, 0.95]
HCP	438	1.442 ± 1.090	1557 ± 326 [20.958]	0.744 ± 0.048	0.894 [0.79, 0.95]
HCP	439	3.730 ± 3.483	898 ± 471 [52.469]	0.698 ± 0.121	0.436 [0.23, 0.66]
HCP	440	2.099 ± 0.880	337 ± 189 [56.209]	0.590 ± 0.094	0.916 [0.85, 0.96]
HCP	441	3.136 ± 1.078	146 ± 92 [62.633]	0.458 ± 0.095	0.896 [0.81, 0.95]
HCP	442	2.656 ± 1.022	383 ± 227 [59.246]	0.573 ± 0.108	0.852 [0.71, 0.93]
HCP	443	2.075 ± 1.471	1192 ± 637 [53.423]	0.788 ± 0.099	0.271 [0.13, 0.48]
HCP	444	3.284 ± 1.840	1235 ± 542 [43.921]	0.637 ± 0.060	0.608 [0.39, 0.79]
HCP	445	2.186 ± 0.766	592 ± 369 [62.316]	0.608 ± 0.113	0.917 [0.84, 0.96]
HCP	446	2.226 ± 1.396	1752 ± 901 [51.459]	0.743 ± 0.087	0.757 [0.58, 0.88]
HCP	447	2.732 ± 1.471	249 ± 149 [59.736]	0.556 ± 0.092	0.936 [0.88, 0.97]
HCP	448	3.672 ± 1.665	982 ± 724 [73.663]	0.643 ± 0.088	0.705 [0.48, 0.86]
HCP	449	1.995 ± 0.944	782 ± 446 [57.029]	0.673 ± 0.104	0.869 [0.74, 0.94]
HCP	450	3.711 ± 3.097	705 ± 237 [33.616]	0.588 ± 0.062	0.522 [0.30, 0.74]
HCP	451	1.588 ± 0.615	377 ± 147 [39.025]	0.727 ± 0.086	0.913 [0.83, 0.96]
HCP	452	2.207 ± 1.611	1600 ± 724 [45.220]	0.730 ± 0.085	0.705 [0.49, 0.86]
HCP	453	3.476 ± 1.822	468 ± 338 [72.256]	0.650 ± 0.090	0.939 [0.88, 0.97]
HCP	454	3.175 ± 1.859	949 ± 580 [61.156]	0.747 ± 0.113	0.872 [0.75, 0.94]
HCP	455	2.129 ± 1.018	459 ± 317 [68.990]	0.637 ± 0.109	0.904 [0.79, 0.96]
HCP	456	1.451 ± 0.959	1306 ± 865 [66.211]	0.728 ± 0.086	0.839 [0.69, 0.93]
HCP	457	1.824 ± 0.920	882 ± 377 [42.748]	0.702 ± 0.094	0.820 [0.65, 0.92]
HCP	458	3.715 ± 1.662	679 ± 552 [81.291]	0.591 ± 0.116	0.696 [0.47, 0.85]
HCP	459	2.199 ± 1.247	507 ± 322 [63.448]	0.614 ± 0.123	0.852 [0.72, 0.93]
HCP	460	1.726 ± 0.888	525 ± 273 [51.916]	0.659 ± 0.085	0.867 [0.75, 0.94]
HCP	461	2.838 ± 1.255	263 ± 109 [41.445]	0.559 ± 0.088	0.917 [0.84, 0.96]
HCP	462	2.051 ± 0.669	617 ± 344 [55.772]	0.705 ± 0.094	0.873 [0.78, 0.94]
HCP	463	2.559 ± 1.309	378 ± 217 [57.488]	0.572 ± 0.131	0.813 [0.67, 0.91]
HCP	464	1.839 ± 0.788	611 ± 353 [57.766]	0.613 ± 0.098	0.882 [0.78, 0.95]
HCP	465	2.304 ± 0.871	188 ± 87 [46.124]	0.526 ± 0.091	0.867 [0.76, 0.94]
HCP	466	1.923 ± 0.963	228 ± 133 [58.521]	0.599 ± 0.125	0.943 [0.90, 0.97]
HCP	467	1.961 ± 0.962	1643 ± 878 [53.432]	0.857 ± 0.085	0.503 [0.30, 0.71]
HCP	468	2.177 ± 1.372	371 ± 146 [39.256]	0.622 ± 0.060	0.860 [0.74, 0.94]
HCP	469	1.873 ± 0.835	483 ± 339 [70.192]	0.593 ± 0.118	0.761 [0.58, 0.89]
HCP	470	3.950 ± 2.749	790 ± 412 [52.185]	0.628 ± 0.108	0.409 [0.21, 0.64]
HCP	471	2.133 ± 0.952	522 ± 294 [56.406]	0.588 ± 0.114	0.844 [0.71, 0.93]
HCP	472	1.605 ± 0.948	1354 ± 553 [40.881]	0.787 ± 0.074	0.790 [0.60, 0.90]
HCP	473	1.697 ± 0.768	491 ± 273 [55.686]	0.657 ± 0.097	0.882 [0.78, 0.95]
HCP	474	2.562 ± 0.797	397 ± 228 [57.374]	0.560 ± 0.095	0.889 [0.80, 0.95]
HCP	475	2.064 ± 1.031	184 ± 84 [45.801]	0.605 ± 0.118	0.955 [0.92, 0.98]
HCP	476	4.327 ± 2.937	528 ± 320 [60.695]	0.539 ± 0.106	0.719 [0.53, 0.86]
HCP	477	2.936 ± 1.155	254 ± 137 [54.095]	0.592 ± 0.113	0.933 [0.88, 0.97]
HCP	478	2.375 ± 1.301	1561 ± 1172 [75.046]	0.698 ± 0.130	0.413 [0.22, 0.64]
HCP	479	3.044 ± 1.579	522 ± 290 [55.624]	0.626 ± 0.120	0.840 [0.73, 0.92]
HCP	480	1.461 ± 0.910	1886 ± 675 [35.810]	0.746 ± 0.082	0.846 [0.71, 0.93]
HCP	481	4.276 ± 3.359	815 ± 380 [46.646]	0.639 ± 0.115	0.631 [0.41, 0.81]
HCP	482	2.530 ± 0.784	196 ± 122 [62.509]	0.537 ± 0.114	0.459 [0.27, 0.67]
HCP	483	2.414 ± 1.346	625 ± 305 [48.717]	0.636 ± 0.129	0.751 [0.55, 0.88]
HCP	484	2.341 ± 0.752	121 ± 74 [60.690]	0.568 ± 0.105	0.821 [0.70, 0.91]
HCP	485	1.532 ± 0.375	382 ± 132 [34.661]	0.669 ± 0.069	0.911 [0.82, 0.96]
HCP	486	4.357 ± 1.614	270 ± 153 [56.544]	0.537 ± 0.086	0.834 [0.71, 0.92]
HCP	487	3.461 ± 2.434	339 ± 171 [50.536]	0.468 ± 0.131	0.406 [0.21, 0.63]
HCP	488	2.216 ± 1.328	1547 ± 565 [36.544]	0.801 ± 0.082	0.651 [0.43, 0.83]
HCP	489	1.951 ± 0.768	338 ± 208 [61.491]	0.735 ± 0.096	0.944 [0.89, 0.98]
HCP	490	2.612 ± 1.590	269 ± 143 [52.997]	0.581 ± 0.089	0.777 [0.60, 0.90]
HCP	491	1.456 ± 0.516	862 ± 410 [47.548]	0.714 ± 0.073	0.882 [0.75, 0.95]
HCP	492	1.469 ± 0.739	597 ± 328 [54.936]	0.742 ± 0.092	0.914 [0.83, 0.96]
HCP	493	1.528 ± 0.466	748 ± 246 [32.904]	0.715 ± 0.068	0.917 [0.84, 0.96]
HCP	494	2.747 ± 0.922	124 ± 62 [50.415]	0.475 ± 0.087	0.802 [0.66, 0.90]
HCP	495	3.268 ± 2.030	482 ± 249 [51.777]	0.607 ± 0.108	0.899 [0.81, 0.95]
HCP	496	2.957 ± 2.492	1638 ± 983 [59.985]	0.659 ± 0.146	0.805 [0.63, 0.91]
HCP	497	2.233 ± 1.290	580 ± 335 [57.873]	0.685 ± 0.118	0.713 [0.53, 0.85]
HCP	498	2.509 ± 1.245	1634 ± 916 [56.049]	0.655 ± 0.103	0.814 [0.65, 0.92]
HCP	499	1.948 ± 0.780	854 ± 597 [69.896]	0.650 ± 0.136	0.615 [0.40, 0.80]
HCP	500	3.794 ± 2.066	1404 ± 869 [61.909]	0.599 ± 0.156	0.575 [0.36, 0.77]
HCP	501	2.786 ± 1.248	358 ± 167 [46.597]	0.708 ± 0.084	0.937 [0.88, 0.97]
HCP	502	4.334 ± 1.735	362 ± 167 [46.052]	0.546 ± 0.084	0.791 [0.63, 0.90]
HCP	503	2.446 ± 2.369	730 ± 239 [32.820]	0.655 ± 0.091	0.786 [0.62, 0.90]
HCP	504	1.772 ± 0.843	813 ± 426 [52.357]	0.765 ± 0.075	0.889 [0.77, 0.95]
HCP	505	1.648 ± 1.191	1224 ± 660 [53.878]	0.699 ± 0.113	0.719 [0.51, 0.86]
HCP	506	2.213 ± 1.340	1070 ± 474 [44.302]	0.689 ± 0.099	0.836 [0.69, 0.93]
HCP	507	2.802 ± 1.500	1123 ± 727 [64.765]	0.591 ± 0.118	0.552 [0.32, 0.76]
HCP	508	2.152 ± 1.310	1254 ± 504 [40.178]	0.739 ± 0.083	0.842 [0.70, 0.93]
HCP	509	2.391 ± 1.904	763 ± 430 [56.354]	0.728 ± 0.121	0.264 [0.12, 0.48]
HCP	510	3.600 ± 1.938	324 ± 188 [57.934]	0.620 ± 0.114	0.903 [0.82, 0.95]
HCP	511	3.044 ± 1.397	567 ± 285 [50.312]	0.742 ± 0.078	0.911 [0.84, 0.96]
HCP	512	4.491 ± 1.763	837 ± 589 [70.455]	0.586 ± 0.132	0.523 [0.29, 0.74]
HCP	513	3.240 ± 1.660	429 ± 290 [67.686]	0.612 ± 0.114	0.850 [0.71, 0.93]
HCP	514	3.120 ± 1.946	2973 ± 1976 [66.447]	0.682 ± 0.098	0.019 [0.00, 0.07]
HCP	515	2.266 ± 0.869	576 ± 436 [75.686]	0.573 ± 0.111	0.862 [0.74, 0.94]
HCP	516	1.503 ± 0.923	990 ± 541 [54.653]	0.690 ± 0.088	0.867 [0.73, 0.94]
HCP	517	2.653 ± 1.448	758 ± 494 [65.158]	0.572 ± 0.136	0.674 [0.46, 0.84]
HCP	518	1.957 ± 1.605	953 ± 410 [43.013]	0.691 ± 0.117	0.877 [0.76, 0.95]
HCP	519	1.697 ± 0.863	522 ± 275 [52.574]	0.784 ± 0.060	0.920 [0.83, 0.97]
HCP	520	2.202 ± 0.939	541 ± 355 [65.515]	0.607 ± 0.123	0.864 [0.73, 0.94]
HCP	521	1.684 ± 1.058	970 ± 422 [43.474]	0.704 ± 0.106	0.851 [0.71, 0.93]
HCP	522	1.794 ± 0.846	1083 ± 630 [58.200]	0.774 ± 0.102	0.401 [0.22, 0.62]
HCP	523	3.231 ± 1.508	1709 ± 1246 [72.932]	0.639 ± 0.133	0.606 [0.38, 0.79]
HCP	524	3.771 ± 2.642	1107 ± 570 [51.538]	0.656 ± 0.133	0.749 [0.55, 0.88]
HCP	525	2.388 ± 0.848	341 ± 176 [51.570]	0.564 ± 0.096	0.906 [0.83, 0.96]
HCP	526	2.821 ± 1.741	764 ± 441 [57.668]	0.668 ± 0.114	0.775 [0.60, 0.89]
HCP	527	1.711 ± 1.175	1959 ± 917 [46.794]	0.855 ± 0.085	0.480 [0.27, 0.70]
HCP	528	2.195 ± 0.903	231 ± 87 [37.512]	0.581 ± 0.089	0.881 [0.79, 0.94]
HCP	529	1.996 ± 0.969	660 ± 335 [50.740]	0.604 ± 0.109	0.830 [0.68, 0.92]
HCP	530	3.160 ± 1.918	2492 ± 1213 [48.683]	0.695 ± 0.101	0.789 [0.61, 0.90]
HCP	531	2.427 ± 1.381	1208 ± 644 [53.346]	0.689 ± 0.098	0.673 [0.45, 0.84]
HCP	532	2.976 ± 1.630	950 ± 539 [56.765]	0.707 ± 0.107	0.807 [0.65, 0.91]
HCP	533	1.775 ± 0.783	461 ± 257 [55.826]	0.608 ± 0.092	0.866 [0.75, 0.94]
HCP	534	2.491 ± 1.316	310 ± 251 [80.973]	0.460 ± 0.116	0.889 [0.78, 0.95]
HCP	535	3.302 ± 1.611	1059 ± 770 [72.713]	0.586 ± 0.148	0.366 [0.18, 0.59]
HCP	536	1.781 ± 1.396	5245 ± 2317 [44.173]	0.909 ± 0.055	0.282 [0.13, 0.50]
HCP	537	2.498 ± 1.051	513 ± 214 [41.822]	0.672 ± 0.072	0.764 [0.61, 0.88]
HCP	538	1.822 ± 0.824	813 ± 439 [54.048]	0.651 ± 0.098	0.830 [0.67, 0.92]
HCP	539	2.041 ± 1.234	731 ± 267 [36.538]	0.698 ± 0.077	0.872 [0.74, 0.94]
HCP	540	1.652 ± 0.557	217 ± 86 [39.485]	0.641 ± 0.057	0.935 [0.88, 0.97]
HCP	541	1.262 ± 0.513	764 ± 290 [37.968]	0.770 ± 0.078	0.876 [0.75, 0.95]
HCP	542	1.326 ± 1.041	741 ± 284 [38.332]	0.702 ± 0.087	0.895 [0.80, 0.95]
HCP	543	3.070 ± 2.013	364 ± 223 [61.190]	0.559 ± 0.103	0.665 [0.45, 0.83]
HCP	544	2.917 ± 1.437	768 ± 472 [61.381]	0.570 ± 0.102	0.771 [0.58, 0.89]
HCP	545	4.012 ± 1.611	211 ± 141 [66.980]	0.527 ± 0.124	0.853 [0.72, 0.93]
HCP	546	2.532 ± 1.580	348 ± 153 [43.911]	0.588 ± 0.128	0.827 [0.68, 0.92]
HCP	547	2.013 ± 1.285	1111 ± 498 [44.814]	0.761 ± 0.060	0.869 [0.74, 0.94]
HCP	548	2.229 ± 0.628	209 ± 140 [66.624]	0.572 ± 0.098	0.902 [0.82, 0.95]
HCP	549	2.905 ± 1.547	365 ± 231 [63.174]	0.546 ± 0.115	0.690 [0.47, 0.85]
HCP	550	1.897 ± 1.068	1711 ± 730 [42.700]	0.743 ± 0.112	0.659 [0.46, 0.82]
HCP	551	2.712 ± 1.337	557 ± 305 [54.700]	0.650 ± 0.119	0.742 [0.56, 0.87]
HCP	552	1.863 ± 0.696	1073 ± 411 [38.324]	0.739 ± 0.053	0.898 [0.80, 0.95]
HCP	553	2.686 ± 1.319	230 ± 114 [49.693]	0.549 ± 0.113	0.906 [0.83, 0.96]
HCP	554	2.159 ± 1.082	849 ± 532 [62.640]	0.713 ± 0.083	0.769 [0.57, 0.89]
HCP	555	3.659 ± 2.501	1119 ± 589 [52.649]	0.651 ± 0.115	0.676 [0.46, 0.84]
HCP	556	1.737 ± 0.791	480 ± 288 [59.980]	0.665 ± 0.107	0.921 [0.83, 0.97]
HCP	557	3.399 ± 1.317	238 ± 165 [69.093]	0.546 ± 0.120	0.871 [0.76, 0.94]
HCP	558	3.237 ± 2.192	679 ± 381 [56.057]	0.596 ± 0.146	0.787 [0.61, 0.90]
HCP	559	2.211 ± 1.181	647 ± 308 [47.681]	0.658 ± 0.096	0.867 [0.76, 0.94]
HCP	560	0.999 ± 0.503	1409 ± 320 [22.690]	0.803 ± 0.032	0.836 [0.68, 0.93]
HCP	561	2.476 ± 0.809	401 ± 237 [59.027]	0.590 ± 0.113	0.907 [0.82, 0.96]
HCP	562	6.458 ± 2.855	772 ± 627 [81.141]	0.525 ± 0.143	0.202 [0.08, 0.40]
HCP	563	2.643 ± 1.245	1017 ± 603 [59.280]	0.632 ± 0.128	0.691 [0.47, 0.85]
HCP	564	2.413 ± 1.295	342 ± 219 [64.104]	0.585 ± 0.137	0.714 [0.51, 0.86]
HCP	565	3.338 ± 1.208	228 ± 93 [40.824]	0.518 ± 0.076	0.893 [0.80, 0.95]
HCP	566	2.196 ± 1.712	339 ± 183 [53.872]	0.515 ± 0.122	0.393 [0.21, 0.62]
HCP	567	2.105 ± 1.125	445 ± 238 [53.476]	0.577 ± 0.118	0.790 [0.63, 0.90]
HCP	568	2.291 ± 1.458	477 ± 306 [64.240]	0.568 ± 0.149	0.702 [0.50, 0.85]
HCP	569	1.691 ± 0.820	496 ± 343 [69.184]	0.659 ± 0.134	0.882 [0.78, 0.95]
HCP	570	3.721 ± 1.806	720 ± 490 [68.097]	0.543 ± 0.135	0.645 [0.42, 0.82]
HCP	571	1.559 ± 0.713	744 ± 343 [46.146]	0.694 ± 0.077	0.831 [0.69, 0.92]
HCP	572	2.362 ± 1.162	340 ± 94 [27.610]	0.654 ± 0.069	0.915 [0.84, 0.96]
HCP	573	1.520 ± 0.653	412 ± 205 [49.763]	0.758 ± 0.078	0.925 [0.85, 0.97]
HCP	574	3.493 ± 1.898	307 ± 191 [62.102]	0.592 ± 0.119	0.852 [0.73, 0.93]
HCP	575	2.859 ± 1.746	362 ± 176 [48.675]	0.632 ± 0.093	0.926 [0.86, 0.97]
HCP	576	4.171 ± 2.885	511 ± 288 [56.478]	0.543 ± 0.142	0.648 [0.43, 0.82]
HCP	577	2.171 ± 1.820	868 ± 449 [51.758]	0.624 ± 0.172	0.523 [0.31, 0.73]
HCP	578	2.729 ± 1.726	2520 ± 1028 [40.782]	0.811 ± 0.083	0.531 [0.30, 0.74]
HCP	579	2.379 ± 1.356	374 ± 190 [50.865]	0.603 ± 0.113	0.735 [0.55, 0.87]
HCP	580	4.339 ± 1.731	293 ± 179 [61.262]	0.502 ± 0.111	0.870 [0.78, 0.94]
HCP	581	3.575 ± 1.241	302 ± 180 [59.563]	0.543 ± 0.133	0.900 [0.82, 0.95]
HCP	582	2.293 ± 0.939	275 ± 172 [62.428]	0.655 ± 0.127	0.929 [0.87, 0.97]
HCP	583	2.123 ± 2.115	585 ± 187 [31.990]	0.713 ± 0.106	0.828 [0.66, 0.92]
HCP	584	3.083 ± 2.130	338 ± 173 [51.300]	0.645 ± 0.119	0.940 [0.88, 0.97]
HCP	585	2.052 ± 0.940	214 ± 114 [53.192]	0.507 ± 0.116	0.869 [0.77, 0.94]
HCP	586	2.446 ± 2.318	2960 ± 1379 [46.573]	0.740 ± 0.133	0.341 [0.17, 0.57]
HCP	587	2.321 ± 1.054	279 ± 100 [35.718]	0.594 ± 0.093	0.912 [0.85, 0.96]
HCP	588	2.184 ± 0.957	1087 ± 796 [73.284]	0.708 ± 0.107	0.252 [0.11, 0.47]
HCP	589	3.783 ± 2.277	532 ± 266 [50.019]	0.652 ± 0.122	0.891 [0.80, 0.95]
HCP	590	4.298 ± 2.303	912 ± 358 [39.259]	0.727 ± 0.071	0.833 [0.72, 0.92]
HCP	591	2.233 ± 0.871	366 ± 182 [49.816]	0.567 ± 0.117	0.789 [0.62, 0.90]
HCP	592	3.743 ± 2.795	2386 ± 1289 [54.047]	0.816 ± 0.093	0.192 [0.08, 0.38]
HCP	593	2.267 ± 0.990	503 ± 382 [76.044]	0.681 ± 0.166	0.718 [0.56, 0.85]
HCP	594	2.091 ± 0.841	890 ± 677 [76.021]	0.679 ± 0.120	0.423 [0.22, 0.65]
HCP	595	1.385 ± 0.909	800 ± 306 [38.276]	0.789 ± 0.086	0.856 [0.71, 0.94]
HCP	596	2.764 ± 1.494	794 ± 400 [50.367]	0.636 ± 0.081	0.848 [0.71, 0.93]
HCP	597	1.567 ± 0.992	914 ± 396 [43.273]	0.711 ± 0.101	0.809 [0.66, 0.91]
HCP	598	2.232 ± 0.788	1119 ± 873 [77.987]	0.766 ± 0.104	0.510 [0.29, 0.72]
HCP	599	2.721 ± 1.497	1246 ± 974 [78.195]	0.695 ± 0.105	0.711 [0.49, 0.86]
HCP	600	4.775 ± 1.823	617 ± 414 [67.215]	0.472 ± 0.115	0.708 [0.50, 0.86]
HCP	601	2.372 ± 1.187	384 ± 257 [67.012]	0.621 ± 0.130	0.855 [0.75, 0.93]
HCP	602	2.685 ± 1.038	484 ± 188 [38.955]	0.605 ± 0.089	0.901 [0.82, 0.95]
HCP	603	2.604 ± 1.708	1116 ± 545 [48.877]	0.698 ± 0.101	0.830 [0.68, 0.92]
HCP	604	3.461 ± 1.362	435 ± 309 [71.049]	0.537 ± 0.085	0.558 [0.34, 0.76]
HCP	605	1.318 ± 0.999	760 ± 304 [39.996]	0.730 ± 0.076	0.808 [0.65, 0.91]
HCP	606	2.128 ± 1.247	1486 ± 777 [52.299]	0.703 ± 0.088	0.685 [0.47, 0.84]
HCP	607	6.698 ± 4.910	2447 ± 1359 [55.522]	0.603 ± 0.166	0.374 [0.20, 0.60]
HCP	608	2.325 ± 0.769	392 ± 232 [59.256]	0.633 ± 0.090	0.911 [0.82, 0.96]
HCP	609	1.661 ± 1.108	1397 ± 642 [45.946]	0.737 ± 0.080	0.851 [0.70, 0.93]
HCP	610	2.033 ± 1.028	172 ± 110 [64.091]	0.506 ± 0.105	0.704 [0.52, 0.85]
HCP	611	1.906 ± 0.969	686 ± 448 [65.271]	0.658 ± 0.114	0.522 [0.31, 0.73]
HCP	612	3.761 ± 2.253	417 ± 186 [44.608]	0.604 ± 0.099	0.822 [0.69, 0.91]
HCP	613	1.256 ± 0.449	330 ± 165 [49.984]	0.744 ± 0.098	0.962 [0.93, 0.98]
HCP	614	2.781 ± 1.452	237 ± 140 [59.216]	0.625 ± 0.124	0.937 [0.88, 0.97]
HCP	615	2.751 ± 1.496	544 ± 295 [54.305]	0.586 ± 0.105	0.839 [0.72, 0.92]
HCP	616	2.664 ± 1.363	399 ± 287 [71.996]	0.578 ± 0.112	0.519 [0.30, 0.73]
HCP	617	1.764 ± 0.511	147 ± 86 [58.070]	0.609 ± 0.089	0.936 [0.88, 0.97]
HCP	618	2.422 ± 0.657	67 ± 38 [56.415]	0.353 ± 0.089	0.849 [0.74, 0.93]
HCP	619	2.808 ± 1.439	970 ± 706 [72.811]	0.646 ± 0.118	0.643 [0.41, 0.82]
HCP	620	2.185 ± 0.924	164 ± 120 [73.289]	0.463 ± 0.138	0.829 [0.69, 0.92]
HCP	621	2.283 ± 1.167	657 ± 498 [75.788]	0.638 ± 0.132	0.847 [0.71, 0.93]
HCP	622	1.970 ± 0.832	548 ± 299 [54.552]	0.674 ± 0.090	0.800 [0.63, 0.91]
HCP	623	2.977 ± 1.109	411 ± 249 [60.737]	0.713 ± 0.103	0.751 [0.58, 0.88]
HCP	624	2.730 ± 1.267	181 ± 95 [52.177]	0.461 ± 0.119	0.881 [0.80, 0.94]
HCP	625	1.536 ± 0.747	633 ± 283 [44.728]	0.694 ± 0.105	0.913 [0.84, 0.96]
HCP	626	2.313 ± 1.109	384 ± 207 [53.790]	0.668 ± 0.097	0.946 [0.90, 0.98]
HCP	627	1.603 ± 0.875	685 ± 425 [62.069]	0.736 ± 0.097	0.824 [0.66, 0.92]
HCP	628	2.145 ± 1.274	618 ± 286 [46.251]	0.647 ± 0.092	0.745 [0.56, 0.88]
HCP	629	2.916 ± 1.561	382 ± 109 [28.559]	0.605 ± 0.059	0.776 [0.61, 0.89]
HCP	630	2.454 ± 0.834	160 ± 65 [40.282]	0.527 ± 0.078	0.941 [0.89, 0.97]
HCP	631	3.370 ± 2.054	1003 ± 694 [69.185]	0.562 ± 0.175	0.311 [0.15, 0.54]
HCP	632	2.559 ± 1.547	736 ± 480 [65.306]	0.600 ± 0.129	0.767 [0.60, 0.89]
HCP	633	2.738 ± 1.970	928 ± 298 [32.108]	0.625 ± 0.100	0.793 [0.60, 0.91]
HCP	634	1.409 ± 0.754	887 ± 285 [32.175]	0.786 ± 0.058	0.889 [0.78, 0.95]
HCP	635	2.226 ± 1.634	888 ± 416 [46.835]	0.670 ± 0.077	0.490 [0.27, 0.71]
HCP	636	2.573 ± 1.550	427 ± 222 [52.085]	0.652 ± 0.091	0.856 [0.73, 0.93]
HCP	637	3.117 ± 1.086	358 ± 273 [76.146]	0.617 ± 0.081	0.809 [0.68, 0.91]
HCP	638	2.054 ± 0.738	433 ± 197 [45.566]	0.677 ± 0.102	0.946 [0.90, 0.98]
HCP	639	1.722 ± 0.553	653 ± 316 [48.482]	0.633 ± 0.094	0.855 [0.73, 0.93]
HCP	640	1.688 ± 1.243	1811 ± 833 [46.022]	0.753 ± 0.118	0.529 [0.31, 0.74]
HCP	641	2.142 ± 1.024	771 ± 431 [55.917]	0.631 ± 0.136	0.257 [0.12, 0.47]
HCP	642	3.895 ± 2.767	3372 ± 1568 [46.495]	0.807 ± 0.105	0.333 [0.16, 0.56]
HCP	643	2.583 ± 0.946	250 ± 131 [52.376]	0.601 ± 0.105	0.944 [0.89, 0.98]
HCP	644	3.770 ± 1.722	245 ± 136 [55.346]	0.574 ± 0.104	0.911 [0.84, 0.96]
HCP	645	2.686 ± 1.234	282 ± 230 [81.519]	0.527 ± 0.120	0.730 [0.53, 0.87]
HCP	646	2.299 ± 1.375	1331 ± 647 [48.608]	0.691 ± 0.099	0.831 [0.68, 0.92]
HCP	647	1.961 ± 0.670	322 ± 169 [52.547]	0.608 ± 0.097	0.900 [0.81, 0.96]
HCP	648	2.581 ± 1.146	193 ± 113 [58.506]	0.632 ± 0.119	0.916 [0.84, 0.96]
HCP	649	2.330 ± 1.637	1942 ± 862 [44.393]	0.744 ± 0.113	0.527 [0.30, 0.74]
HCP	650	2.212 ± 1.191	832 ± 504 [60.498]	0.615 ± 0.104	0.826 [0.67, 0.92]
HCP	651	3.972 ± 2.608	520 ± 269 [51.847]	0.590 ± 0.075	0.766 [0.58, 0.89]
HCP	652	3.689 ± 1.557	58 ± 32 [54.921]	0.232 ± 0.075	0.241 [0.12, 0.44]
HCP	653	2.281 ± 0.933	340 ± 234 [68.918]	0.521 ± 0.116	0.795 [0.62, 0.91]
HCP	654	2.347 ± 1.509	361 ± 145 [40.128]	0.700 ± 0.079	0.950 [0.90, 0.98]
HCP	655	1.963 ± 1.031	1009 ± 574 [56.883]	0.762 ± 0.111	0.733 [0.58, 0.86]
HCP	656	1.238 ± 0.826	1639 ± 658 [40.121]	0.875 ± 0.064	0.343 [0.18, 0.56]
HCP	657	1.699 ± 1.068	870 ± 671 [77.144]	0.675 ± 0.118	0.380 [0.19, 0.61]
HCP	658	1.561 ± 0.781	881 ± 549 [62.316]	0.690 ± 0.094	0.823 [0.70, 0.91]
HCP	659	3.613 ± 1.514	697 ± 656 [94.126]	0.577 ± 0.111	0.446 [0.24, 0.67]
HCP	660	1.588 ± 0.943	829 ± 329 [39.718]	0.711 ± 0.115	0.756 [0.56, 0.88]
HCP	661	3.542 ± 1.736	195 ± 144 [73.950]	0.507 ± 0.119	0.605 [0.39, 0.79]
HCP	662	3.276 ± 2.190	567 ± 358 [63.040]	0.560 ± 0.094	0.580 [0.36, 0.77]
HCP	663	1.993 ± 1.524	651 ± 233 [35.798]	0.678 ± 0.087	0.870 [0.74, 0.94]
HCP	664	3.879 ± 1.731	369 ± 214 [57.944]	0.560 ± 0.093	0.886 [0.80, 0.95]
HCP	665	5.456 ± 3.693	1849 ± 1328 [71.793]	0.661 ± 0.160	0.337 [0.17, 0.56]
HCP	666	2.455 ± 1.583	649 ± 310 [47.728]	0.617 ± 0.087	0.819 [0.66, 0.92]
HCP	667	2.793 ± 1.442	440 ± 326 [74.132]	0.520 ± 0.133	0.866 [0.76, 0.94]
HCP	668	1.478 ± 0.455	169 ± 85 [50.684]	0.584 ± 0.112	0.958 [0.92, 0.98]
HCP	669	2.723 ± 1.661	256 ± 79 [30.703]	0.595 ± 0.094	0.469 [0.30, 0.67]
HCP	670	4.208 ± 2.825	1302 ± 672 [51.573]	0.654 ± 0.105	0.298 [0.13, 0.52]
HCP	671	3.270 ± 1.221	250 ± 143 [57.206]	0.541 ± 0.084	0.931 [0.88, 0.97]
HCP	672	3.367 ± 2.432	271 ± 192 [70.868]	0.515 ± 0.163	0.859 [0.76, 0.93]
HCP	673	2.369 ± 1.334	1118 ± 628 [56.132]	0.720 ± 0.114	0.627 [0.42, 0.81]
HCP	674	3.221 ± 2.399	1147 ± 634 [55.310]	0.715 ± 0.139	0.626 [0.40, 0.81]
HCP	675	1.952 ± 1.699	1308 ± 570 [43.590]	0.828 ± 0.106	0.353 [0.17, 0.58]
HCP	676	2.691 ± 1.129	169 ± 84 [49.340]	0.598 ± 0.080	0.869 [0.77, 0.94]
HCP	677	2.184 ± 0.783	559 ± 339 [60.519]	0.704 ± 0.086	0.825 [0.70, 0.92]
HCP	678	2.577 ± 1.544	273 ± 172 [63.090]	0.558 ± 0.129	0.809 [0.65, 0.91]
HCP	679	1.843 ± 1.280	1183 ± 370 [31.285]	0.734 ± 0.090	0.858 [0.72, 0.94]
HCP	680	3.665 ± 1.915	1040 ± 466 [44.782]	0.749 ± 0.074	0.867 [0.77, 0.94]
HCP	681	1.392 ± 0.659	208 ± 99 [47.503]	0.684 ± 0.107	0.957 [0.92, 0.98]
HCP	682	3.377 ± 1.578	192 ± 107 [55.496]	0.465 ± 0.118	0.904 [0.82, 0.96]
HCP	683	2.208 ± 0.617	267 ± 156 [58.466]	0.564 ± 0.093	0.767 [0.60, 0.89]
HCP	684	2.077 ± 0.983	280 ± 168 [60.161]	0.624 ± 0.128	0.951 [0.91, 0.98]
HCP	685	3.212 ± 1.538	117 ± 60 [51.824]	0.388 ± 0.133	0.449 [0.27, 0.66]
HCP	686	1.904 ± 0.819	542 ± 263 [48.533]	0.629 ± 0.093	0.858 [0.72, 0.94]
HCP	687	1.761 ± 1.087	532 ± 311 [58.500]	0.690 ± 0.135	0.744 [0.57, 0.87]
HCP	688	3.142 ± 1.007	19 ± 10 [51.755]	0.154 ± 0.049	0.352 [0.22, 0.56]
HCP	689	2.290 ± 1.150	203 ± 115 [56.725]	0.505 ± 0.103	0.885 [0.80, 0.95]
HCP	690	2.229 ± 1.121	259 ± 129 [50.013]	0.784 ± 0.039	0.859 [0.76, 0.93]
HCP	691	1.586 ± 0.716	731 ± 337 [46.064]	0.726 ± 0.069	0.821 [0.68, 0.92]
HCP	692	2.411 ± 1.268	411 ± 187 [45.454]	0.594 ± 0.095	0.888 [0.78, 0.95]
HCP	693	2.575 ± 0.868	137 ± 84 [61.437]	0.563 ± 0.072	0.786 [0.65, 0.89]
HCP	694	1.887 ± 0.579	705 ± 365 [51.811]	0.646 ± 0.122	0.871 [0.76, 0.94]
HCP	695	3.051 ± 1.331	630 ± 268 [42.450]	0.722 ± 0.076	0.902 [0.80, 0.96]
HCP	696	2.423 ± 0.890	295 ± 184 [62.229]	0.625 ± 0.090	0.853 [0.75, 0.93]
HCP	697	1.954 ± 1.232	466 ± 216 [46.380]	0.591 ± 0.111	0.824 [0.67, 0.92]
HCP	698	4.347 ± 2.596	873 ± 479 [54.821]	0.561 ± 0.108	0.218 [0.09, 0.42]
HCP	699	2.185 ± 0.936	828 ± 344 [41.552]	0.801 ± 0.056	0.808 [0.67, 0.91]
HCP	700	2.193 ± 1.001	581 ± 353 [60.773]	0.644 ± 0.133	0.873 [0.76, 0.94]
HCP	701	2.263 ± 1.149	749 ± 393 [52.476]	0.662 ± 0.108	0.793 [0.61, 0.91]
HCP	702	2.083 ± 1.243	387 ± 203 [52.512]	0.613 ± 0.138	0.892 [0.80, 0.95]
HCP	703	1.942 ± 0.917	1595 ± 1003 [62.888]	0.783 ± 0.111	0.517 [0.30, 0.73]
HCP	704	1.819 ± 0.765	250 ± 134 [53.526]	0.645 ± 0.099	0.956 [0.92, 0.98]
HCP	705	2.381 ± 0.713	236 ± 171 [72.550]	0.495 ± 0.116	0.781 [0.62, 0.89]
HCP	706	1.883 ± 0.963	1307 ± 786 [60.162]	0.720 ± 0.098	0.518 [0.29, 0.73]
HCP	707	4.295 ± 1.873	364 ± 235 [64.471]	0.565 ± 0.097	0.716 [0.50, 0.86]
HCP	708	4.395 ± 2.408	1477 ± 1099 [74.413]	0.552 ± 0.180	0.107 [0.04, 0.24]
HCP	709	1.518 ± 0.867	640 ± 318 [49.745]	0.703 ± 0.087	0.867 [0.74, 0.94]
HCP	710	1.969 ± 1.097	753 ± 435 [57.824]	0.632 ± 0.119	0.628 [0.41, 0.81]
HCP	711	2.558 ± 1.594	420 ± 257 [61.280]	0.575 ± 0.108	0.361 [0.19, 0.58]
HCP	712	4.524 ± 4.049	2680 ± 1064 [39.703]	0.777 ± 0.109	0.546 [0.31, 0.76]
HCP	713	2.546 ± 1.038	61 ± 33 [53.479]	0.258 ± 0.085	0.340 [0.20, 0.54]
HCP	714	1.758 ± 0.742	269 ± 113 [41.881]	0.656 ± 0.086	0.882 [0.78, 0.95]
HCP	715	1.537 ± 0.536	469 ± 221 [47.058]	0.661 ± 0.078	0.871 [0.74, 0.94]
HCP	716	1.295 ± 0.435	675 ± 206 [30.535]	0.780 ± 0.059	0.824 [0.68, 0.92]
HCP	717	1.735 ± 0.806	448 ± 229 [51.065]	0.699 ± 0.091	0.939 [0.88, 0.97]
HCP	718	2.594 ± 1.362	357 ± 195 [54.612]	0.542 ± 0.093	0.802 [0.64, 0.91]
HCP	719	2.625 ± 1.118	248 ± 94 [37.819]	0.640 ± 0.069	0.934 [0.88, 0.97]
HCP	720	2.930 ± 1.027	489 ± 287 [58.683]	0.561 ± 0.101	0.849 [0.70, 0.93]
HCP	721	3.501 ± 1.463	286 ± 140 [49.076]	0.622 ± 0.114	0.940 [0.88, 0.97]
HCP	722	1.748 ± 0.899	901 ± 443 [49.226]	0.663 ± 0.131	0.800 [0.62, 0.91]
HCP	723	3.805 ± 1.650	647 ± 354 [54.773]	0.586 ± 0.094	0.644 [0.42, 0.82]
HCP	724	3.463 ± 1.993	515 ± 352 [68.370]	0.496 ± 0.123	0.819 [0.68, 0.91]
HCP	725	3.850 ± 1.576	653 ± 463 [70.942]	0.619 ± 0.133	0.713 [0.50, 0.86]
HCP	726	3.917 ± 1.614	731 ± 564 [77.158]	0.558 ± 0.125	0.744 [0.56, 0.88]
HCP	727	3.946 ± 2.016	244 ± 140 [57.536]	0.545 ± 0.109	0.896 [0.81, 0.95]
HCP	728	4.042 ± 2.532	1039 ± 812 [78.095]	0.564 ± 0.119	0.866 [0.75, 0.94]
HCP	729	2.735 ± 1.040	21 ± 11 [50.662]	0.177 ± 0.060	0.260 [0.14, 0.45]
HCP	730	4.489 ± 2.335	397 ± 217 [54.654]	0.501 ± 0.136	0.521 [0.32, 0.72]
HCP	731	3.056 ± 1.807	2025 ± 1252 [61.833]	0.742 ± 0.184	0.395 [0.21, 0.62]
HCP	732	2.675 ± 1.712	892 ± 529 [59.315]	0.710 ± 0.118	0.279 [0.13, 0.50]
HCP	733	1.434 ± 0.887	2182 ± 869 [39.840]	0.866 ± 0.119	0.272 [0.13, 0.49]
HCP	734	1.996 ± 1.205	564 ± 299 [53.070]	0.674 ± 0.110	0.771 [0.58, 0.89]
HCP	735	2.229 ± 1.339	360 ± 202 [56.205]	0.708 ± 0.066	0.634 [0.43, 0.81]
HCP	736	2.104 ± 1.475	1522 ± 897 [58.920]	0.749 ± 0.118	0.581 [0.40, 0.77]
HCP	737	3.350 ± 0.724	7 ± 3 [34.283]	0.081 ± 0.030	0.216 [0.11, 0.40]
HCP	738	3.515 ± 1.594	221 ± 153 [69.475]	0.503 ± 0.125	0.819 [0.70, 0.91]
HCP	739	2.375 ± 0.903	279 ± 169 [60.324]	0.665 ± 0.127	0.929 [0.86, 0.97]
HCP	740	2.166 ± 0.714	209 ± 131 [62.731]	0.566 ± 0.129	0.940 [0.89, 0.97]
HCP	741	2.347 ± 1.074	159 ± 99 [62.317]	0.513 ± 0.130	0.930 [0.87, 0.97]
HCP	742	2.329 ± 1.323	306 ± 181 [58.980]	0.618 ± 0.157	0.890 [0.81, 0.95]
HCP	743	4.532 ± 2.584	523 ± 314 [59.965]	0.563 ± 0.138	0.825 [0.67, 0.92]
HCP	744	1.701 ± 1.226	691 ± 252 [36.460]	0.756 ± 0.086	0.852 [0.70, 0.94]
HCP	745	3.611 ± 3.368	1998 ± 1016 [50.859]	0.767 ± 0.158	0.412 [0.21, 0.64]
HCP	746	2.820 ± 1.011	241 ± 156 [64.480]	0.550 ± 0.111	0.828 [0.72, 0.91]
HCP	747	2.048 ± 1.077	738 ± 452 [61.232]	0.644 ± 0.109	0.688 [0.48, 0.85]
HCP	748	3.000 ± 1.754	723 ± 425 [58.812]	0.591 ± 0.104	0.708 [0.50, 0.86]
HCP	749	1.993 ± 0.582	245 ± 117 [47.784]	0.719 ± 0.071	0.845 [0.73, 0.93]
HCP	750	3.552 ± 1.153	20 ± 12 [59.312]	0.128 ± 0.046	0.268 [0.15, 0.46]
HCP	751	3.523 ± 1.762	229 ± 150 [65.719]	0.472 ± 0.110	0.808 [0.65, 0.91]
HCP	752	1.646 ± 0.740	1229 ± 725 [59.004]	0.639 ± 0.114	0.042 [0.01, 0.12]
HCP	753	1.652 ± 0.780	1091 ± 433 [39.677]	0.728 ± 0.084	0.909 [0.81, 0.96]
HCP	754	3.047 ± 1.956	210 ± 135 [64.526]	0.473 ± 0.142	0.899 [0.82, 0.95]
HCP	755	4.900 ± 2.348	883 ± 622 [70.425]	0.566 ± 0.132	0.308 [0.14, 0.54]
HCP	756	2.631 ± 2.794	2311 ± 841 [36.390]	0.821 ± 0.124	0.157 [0.06, 0.33]
HCP	757	5.042 ± 2.868	2476 ± 1010 [40.781]	0.729 ± 0.110	0.239 [0.10, 0.45]
HCP	758	3.464 ± 1.714	214 ± 108 [50.607]	0.554 ± 0.110	0.861 [0.75, 0.93]
HCP	759	2.474 ± 1.308	729 ± 450 [61.818]	0.544 ± 0.157	0.460 [0.27, 0.68]
HCP	760	2.484 ± 0.805	102 ± 60 [59.363]	0.547 ± 0.085	0.938 [0.89, 0.97]
HCP	761	2.530 ± 1.065	177 ± 97 [54.886]	0.543 ± 0.140	0.953 [0.91, 0.98]
HCP	762	3.526 ± 1.271	59 ± 30 [50.342]	0.285 ± 0.089	0.415 [0.26, 0.62]
HCP	763	5.924 ± 1.899	1076 ± 692 [64.315]	0.496 ± 0.132	0.242 [0.11, 0.45]
HCP	764	4.274 ± 2.290	1316 ± 907 [68.909]	0.551 ± 0.157	0.499 [0.28, 0.71]
HCP	765	6.879 ± 2.456	2780 ± 1936 [69.624]	0.734 ± 0.107	0.147 [0.06, 0.31]
HCP	766	2.066 ± 0.858	263 ± 159 [60.334]	0.624 ± 0.127	0.948 [0.90, 0.98]
HCP	767	4.116 ± 1.472	114 ± 76 [66.816]	0.362 ± 0.154	0.833 [0.73, 0.92]
HCP	768	1.502 ± 0.616	387 ± 136 [35.152]	0.687 ± 0.121	0.893 [0.80, 0.95]
HCP	769	3.537 ± 1.681	692 ± 397 [57.316]	0.588 ± 0.119	0.691 [0.47, 0.85]
HCP	770	1.497 ± 0.618	2315 ± 393 [16.964]	0.826 ± 0.019	0.598 [0.36, 0.79]
HCP	771	2.375 ± 1.002	238 ± 111 [46.550]	0.658 ± 0.077	0.783 [0.64, 0.89]
HCP	772	2.563 ± 1.302	198 ± 91 [45.915]	0.645 ± 0.061	0.929 [0.87, 0.97]
HCP	773	3.934 ± 1.738	212 ± 138 [65.349]	0.494 ± 0.105	0.809 [0.69, 0.91]
HCP	774	3.929 ± 1.952	325 ± 180 [55.435]	0.552 ± 0.110	0.846 [0.71, 0.93]
HCP	775	2.009 ± 0.956	1140 ± 902 [79.109]	0.611 ± 0.138	0.262 [0.12, 0.47]
HCP	776	2.716 ± 1.126	227 ± 189 [82.962]	0.529 ± 0.154	0.805 [0.68, 0.90]
HCP	777	3.066 ± 1.202	248 ± 129 [52.120]	0.598 ± 0.078	0.941 [0.88, 0.97]
HCP	778	4.301 ± 2.644	2235 ± 1198 [53.627]	0.663 ± 0.137	0.389 [0.21, 0.61]
HCP	779	2.052 ± 0.898	468 ± 296 [63.275]	0.660 ± 0.141	0.924 [0.86, 0.97]
HCP	780	2.869 ± 1.446	1352 ± 994 [73.559]	0.625 ± 0.181	0.098 [0.04, 0.22]
HCP	781	1.087 ± 0.431	1352 ± 273 [20.175]	0.883 ± 0.023	0.436 [0.24, 0.66]
HCP	782	3.079 ± 1.402	1818 ± 1887 [103.771]	0.590 ± 0.160	0.017 [-0.00, 0.06]
HCP	783	2.264 ± 0.959	150 ± 62 [41.087]	0.583 ± 0.089	0.933 [0.87, 0.97]
HCP	784	1.906 ± 1.021	182 ± 94 [51.550]	0.623 ± 0.142	0.961 [0.92, 0.98]
HCP	785	5.515 ± 3.835	1749 ± 1031 [58.940]	0.612 ± 0.211	0.333 [0.16, 0.56]
HCP	786	3.368 ± 1.381	208 ± 150 [71.991]	0.506 ± 0.100	0.907 [0.83, 0.96]
HCP	787	3.278 ± 2.354	1169 ± 763 [65.278]	0.626 ± 0.190	0.248 [0.12, 0.45]
HCP	788	1.840 ± 0.760	93 ± 42 [45.424]	0.646 ± 0.052	0.809 [0.69, 0.91]
HCP	789	2.221 ± 0.869	99 ± 45 [45.364]	0.565 ± 0.104	0.843 [0.74, 0.92]
HCP	790	3.045 ± 1.463	327 ± 193 [59.091]	0.599 ± 0.134	0.879 [0.79, 0.94]
HCP	791	2.075 ± 0.949	877 ± 552 [62.904]	0.779 ± 0.102	0.910 [0.83, 0.96]
HCP	792	4.010 ± 0.941	11 ± 12 [108.729]	0.089 ± 0.052	0.224 [0.12, 0.41]
HCP	793	3.479 ± 2.040	545 ± 279 [51.123]	0.650 ± 0.095	0.794 [0.65, 0.90]
HCP	794	2.482 ± 1.163	276 ± 94 [34.245]	0.738 ± 0.033	0.885 [0.79, 0.95]
HCP	795	3.250 ± 1.243	112 ± 51 [45.571]	0.364 ± 0.074	0.787 [0.64, 0.90]
HCP	796	2.434 ± 1.220	40 ± 18 [46.467]	0.304 ± 0.122	0.326 [0.19, 0.53]
HCP	797	2.609 ± 1.018	118 ± 52 [43.759]	0.495 ± 0.086	0.737 [0.59, 0.86]
HCP	798	4.940 ± 2.571	73 ± 34 [46.681]	0.324 ± 0.104	0.557 [0.39, 0.74]
HCP	799	3.755 ± 1.437	62 ± 30 [47.898]	0.356 ± 0.087	0.734 [0.59, 0.86]
MyConnectome QB	0	2.523 ± 1.950	2384 ± 1895 [79.481]	0.717 ± 0.155	0.324 [0.16, 0.54]
MyConnectome QB	1	1.018 ± 0.760	996 ± 368 [36.989]	0.836 ± 0.062	0.904 [0.80, 0.96]
MyConnectome QB	2	2.053 ± 1.459	465 ± 258 [55.454]	0.720 ± 0.109	0.964 [0.94, 0.98]
MyConnectome QB	3	3.130 ± 1.100	16 ± 9 [53.910]	0.170 ± 0.059	0.381 [0.24, 0.58]
MyConnectome QB	4	1.916 ± 0.906	763 ± 422 [55.323]	0.810 ± 0.099	0.934 [0.86, 0.97]
MyConnectome QB	5	1.639 ± 1.123	1855 ± 954 [51.416]	0.794 ± 0.098	0.404 [0.22, 0.63]
MyConnectome QB	6	2.570 ± 2.020	1779 ± 923 [51.909]	0.840 ± 0.103	0.725 [0.52, 0.87]
MyConnectome QB	7	1.897 ± 1.678	1462 ± 704 [48.189]	0.769 ± 0.143	0.716 [0.51, 0.86]
MyConnectome QB	8	1.832 ± 0.986	183 ± 73 [39.602]	0.603 ± 0.096	0.939 [0.89, 0.97]
MyConnectome QB	9	1.980 ± 0.911	146 ± 92 [63.219]	0.484 ± 0.121	0.980 [0.96, 0.99]
MyConnectome QB	10	0.822 ± 0.765	1910 ± 892 [46.685]	0.912 ± 0.075	0.953 [0.90, 0.98]
MyConnectome QB	11	2.077 ± 1.336	1698 ± 886 [52.171]	0.851 ± 0.067	0.918 [0.84, 0.96]
MyConnectome QB	12	1.895 ± 0.976	849 ± 641 [75.426]	0.701 ± 0.134	0.714 [0.50, 0.86]
MyConnectome QB	13	1.980 ± 1.094	219 ± 116 [52.951]	0.537 ± 0.131	0.983 [0.97, 0.99]
MyConnectome QB	14	1.398 ± 1.165	489 ± 200 [40.807]	0.723 ± 0.092	0.950 [0.90, 0.98]
MyConnectome QB	15	1.247 ± 1.344	7186 ± 2712 [37.746]	0.945 ± 0.058	0.900 [0.78, 0.96]
MyConnectome QB	16	2.416 ± 1.683	163 ± 100 [61.214]	0.545 ± 0.094	0.967 [0.94, 0.98]
MyConnectome QB	17	1.181 ± 0.720	435 ± 211 [48.494]	0.727 ± 0.117	0.987 [0.98, 0.99]
MyConnectome QB	18	1.381 ± 0.671	121 ± 23 [18.878]	0.563 ± 0.033	0.981 [0.97, 0.99]
MyConnectome QB	19	1.486 ± 0.783	2928 ± 1353 [46.195]	0.918 ± 0.069	0.938 [0.86, 0.97]
MyConnectome QB	20	2.031 ± 1.382	270 ± 132 [48.781]	0.672 ± 0.093	0.957 [0.92, 0.98]
MyConnectome QB	21	-	-	-	-
MyConnectome QB	22	1.664 ± 1.005	931 ± 350 [37.619]	0.874 ± 0.087	0.816 [0.69, 0.91]
MyConnectome QB	23	1.433 ± 1.089	576 ± 283 [49.189]	0.779 ± 0.104	0.851 [0.70, 0.93]
MyConnectome QB	24	2.325 ± 1.820	2023 ± 1198 [59.212]	0.829 ± 0.105	0.581 [0.36, 0.78]
MyConnectome QB	25	0.863 ± 0.796	327 ± 81 [24.943]	0.773 ± 0.068	0.990 [0.98, 1.00]
MyConnectome QB	26	2.973 ± 1.330	90 ± 42 [46.815]	0.401 ± 0.103	0.769 [0.63, 0.88]
MyConnectome QB	27	1.588 ± 1.528	2670 ± 790 [29.589]	0.922 ± 0.037	0.957 [0.91, 0.98]
MyConnectome QB	28	1.496 ± 1.906	946 ± 261 [27.579]	0.815 ± 0.078	0.761 [0.58, 0.89]
MyConnectome QB	29	2.057 ± 1.076	222 ± 199 [89.338]	0.626 ± 0.164	0.493 [0.31, 0.70]
MyConnectome QB	30	1.153 ± 1.102	2576 ± 748 [29.057]	0.887 ± 0.061	0.942 [0.87, 0.98]
MyConnectome QB	31	1.773 ± 1.228	2150 ± 977 [45.451]	0.821 ± 0.072	0.317 [0.15, 0.55]
MyConnectome QB	32	2.025 ± 1.349	5235 ± 2654 [50.710]	0.848 ± 0.099	0.516 [0.31, 0.72]
MyConnectome QB	33	1.674 ± 1.291	1491 ± 947 [63.546]	0.849 ± 0.087	0.823 [0.67, 0.92]
MyConnectome QB	34	1.000 ± 1.060	2141 ± 939 [43.842]	0.906 ± 0.070	0.907 [0.80, 0.96]
MyConnectome QB	35	2.821 ± 1.423	170 ± 82 [48.068]	0.542 ± 0.103	0.908 [0.85, 0.96]
MyConnectome QB	36	1.397 ± 1.131	2940 ± 1412 [48.025]	0.947 ± 0.037	0.989 [0.98, 1.00]
MyConnectome QB	37	1.336 ± 1.013	1449 ± 635 [43.815]	0.890 ± 0.070	0.921 [0.84, 0.97]
MyConnectome QB	38	1.714 ± 0.594	63 ± 29 [45.660]	0.521 ± 0.077	0.872 [0.78, 0.94]
MyConnectome QB	39	2.497 ± 1.034	330 ± 202 [61.276]	0.668 ± 0.085	0.965 [0.94, 0.98]
MyConnectome QB	40	1.164 ± 1.457	2352 ± 882 [37.485]	0.866 ± 0.107	0.963 [0.93, 0.98]
MyConnectome QB	41	0.981 ± 0.840	1434 ± 668 [46.566]	0.862 ± 0.105	0.896 [0.80, 0.95]
MyConnectome QB	42	0.843 ± 0.908	1627 ± 453 [27.822]	0.862 ± 0.075	0.935 [0.86, 0.97]
MyConnectome QB	43	1.734 ± 1.188	2514 ± 1232 [49.005]	0.891 ± 0.082	0.794 [0.66, 0.90]
MyConnectome QB	44	2.467 ± 0.733	88 ± 47 [53.490]	0.366 ± 0.083	0.959 [0.93, 0.98]
MyConnectome QB	45	0.798 ± 0.902	535 ± 121 [22.555]	0.817 ± 0.047	0.994 [0.99, 1.00]
MyConnectome QB	46	1.255 ± 1.621	1137 ± 262 [23.058]	0.807 ± 0.046	0.865 [0.74, 0.94]
MyConnectome QB	47	1.343 ± 1.368	335 ± 115 [34.222]	0.681 ± 0.108	0.988 [0.98, 0.99]
MyConnectome QB	48	2.261 ± 1.624	3233 ± 2023 [62.572]	0.814 ± 0.107	0.276 [0.14, 0.49]
MyConnectome QB	49	1.136 ± 0.688	680 ± 317 [46.642]	0.815 ± 0.105	0.993 [0.99, 1.00]
MyConnectome QB	50	2.784 ± 1.998	1608 ± 987 [61.383]	0.807 ± 0.121	0.684 [0.46, 0.84]
MyConnectome QB	51	2.031 ± 1.222	506 ± 299 [59.041]	0.799 ± 0.083	0.897 [0.81, 0.95]
MyConnectome QB	52	2.366 ± 1.720	1850 ± 1425 [76.994]	0.790 ± 0.138	0.779 [0.60, 0.90]
MyConnectome QB	53	1.173 ± 0.948	2361 ± 1349 [57.148]	0.905 ± 0.070	0.977 [0.95, 0.99]
MyConnectome QB	54	1.853 ± 1.322	675 ± 284 [42.136]	0.765 ± 0.104	0.932 [0.85, 0.97]
MyConnectome QB	55	1.131 ± 1.087	2428 ± 1038 [42.758]	0.897 ± 0.082	0.921 [0.84, 0.97]
MyConnectome QB	56	2.176 ± 1.603	330 ± 155 [46.912]	0.679 ± 0.123	0.966 [0.94, 0.98]
MyConnectome QB	57	2.011 ± 0.915	325 ± 290 [89.088]	0.616 ± 0.124	0.964 [0.93, 0.98]
MyConnectome QB	58	1.224 ± 0.751	2518 ± 673 [26.730]	0.874 ± 0.040	0.937 [0.86, 0.97]
MyConnectome QB	59	1.087 ± 0.655	212 ± 57 [27.007]	0.662 ± 0.065	0.937 [0.89, 0.97]
MyConnectome QB	60	2.619 ± 1.640	2643 ± 1805 [68.317]	0.733 ± 0.145	0.781 [0.63, 0.89]
MyConnectome QB	61	1.368 ± 0.540	102 ± 24 [23.291]	0.508 ± 0.056	0.982 [0.97, 0.99]
MyConnectome QB	62	2.546 ± 1.254	927 ± 572 [61.639]	0.697 ± 0.120	0.565 [0.36, 0.76]
MyConnectome QB	63	2.143 ± 1.179	279 ± 165 [59.035]	0.601 ± 0.108	0.927 [0.84, 0.97]
MyConnectome QB	64	2.316 ± 1.310	2211 ± 734 [33.209]	0.936 ± 0.021	0.868 [0.73, 0.94]
MyConnectome QB	65	2.933 ± 2.486	874 ± 498 [56.997]	0.635 ± 0.172	0.424 [0.24, 0.64]
MyConnectome QB	66	1.505 ± 0.672	144 ± 63 [43.885]	0.489 ± 0.116	0.683 [0.53, 0.83]
MyConnectome QB	67	0.984 ± 1.086	716 ± 332 [46.401]	0.763 ± 0.145	0.965 [0.93, 0.98]
MyConnectome QB	68	1.667 ± 1.900	1607 ± 712 [44.278]	0.878 ± 0.076	0.798 [0.60, 0.91]
MyConnectome QB	69	2.802 ± 0.763	29 ± 15 [50.161]	0.207 ± 0.068	0.875 [0.79, 0.94]
MyConnectome QB	70	1.911 ± 1.030	243 ± 144 [59.110]	0.640 ± 0.120	0.956 [0.92, 0.98]
MyConnectome QB	71	2.441 ± 1.264	209 ± 324 [154.833]	0.460 ± 0.164	0.370 [0.20, 0.59]
MyConnectome QB	72	2.883 ± 1.180	397 ± 299 [75.347]	0.656 ± 0.126	0.684 [0.52, 0.83]
MyConnectome QB	73	3.280 ± 1.646	811 ± 542 [66.874]	0.734 ± 0.129	0.898 [0.79, 0.96]
MyConnectome QB	74	2.294 ± 1.739	2603 ± 1268 [48.722]	0.868 ± 0.093	0.776 [0.58, 0.90]
MyConnectome QB	75	1.965 ± 1.320	177 ± 79 [44.505]	0.500 ± 0.108	0.818 [0.69, 0.91]
MyConnectome QB	76	4.228 ± 1.957	1071 ± 732 [68.366]	0.598 ± 0.225	0.221 [0.09, 0.43]
MyConnectome QB	77	2.115 ± 0.976	254 ± 158 [62.089]	0.632 ± 0.132	0.904 [0.84, 0.95]
MyConnectome QB	78	1.204 ± 0.700	374 ± 165 [44.062]	0.718 ± 0.099	0.976 [0.96, 0.99]
MyConnectome QB	79	1.981 ± 0.971	464 ± 240 [51.602]	0.760 ± 0.091	0.959 [0.92, 0.98]
MyConnectome QB	80	0.940 ± 1.262	1143 ± 251 [21.968]	0.877 ± 0.057	0.910 [0.81, 0.96]
MyConnectome QB	81	2.190 ± 1.671	243 ± 108 [44.706]	0.637 ± 0.146	0.972 [0.95, 0.99]
MyConnectome QB	82	2.185 ± 1.090	680 ± 521 [76.608]	0.625 ± 0.130	0.636 [0.41, 0.81]
MyConnectome QB	83	2.109 ± 1.454	2388 ± 1464 [61.309]	0.813 ± 0.105	0.729 [0.56, 0.86]
MyConnectome QB	84	1.950 ± 1.345	2368 ± 1074 [45.344]	0.847 ± 0.083	0.852 [0.76, 0.93]
MyConnectome QB	85	4.435 ± 3.282	36 ± 52 [143.766]	0.239 ± 0.154	0.345 [0.21, 0.55]
MyConnectome QB	86	1.701 ± 1.208	919 ± 472 [51.318]	0.782 ± 0.087	0.642 [0.44, 0.81]
MyConnectome QB	87	1.955 ± 0.789	155 ± 86 [55.585]	0.515 ± 0.120	0.965 [0.94, 0.98]
MyConnectome QB	88	5.423 ± 2.089	428 ± 313 [73.064]	0.510 ± 0.161	0.491 [0.30, 0.70]
MyConnectome QB	89	2.232 ± 1.275	1160 ± 767 [66.084]	0.832 ± 0.097	0.877 [0.76, 0.95]
MyConnectome QB	90	1.706 ± 0.866	242 ± 184 [76.155]	0.606 ± 0.130	0.952 [0.91, 0.98]
MyConnectome QB	91	2.086 ± 1.482	1015 ± 611 [60.200]	0.789 ± 0.113	0.733 [0.53, 0.87]
MyConnectome QB	92	2.936 ± 1.050	1105 ± 812 [73.473]	0.803 ± 0.107	0.740 [0.54, 0.88]
MyConnectome QB	93	1.712 ± 0.994	173 ± 95 [54.610]	0.539 ± 0.109	0.985 [0.97, 0.99]
MyConnectome QB	94	0.979 ± 1.180	949 ± 298 [31.465]	0.883 ± 0.055	0.884 [0.78, 0.95]
MyConnectome QB	95	1.645 ± 1.036	409 ± 149 [36.294]	0.666 ± 0.092	0.923 [0.86, 0.96]
MyConnectome QB	96	1.352 ± 0.612	132 ± 48 [36.385]	0.550 ± 0.076	0.951 [0.91, 0.98]
MyConnectome QB	97	1.678 ± 1.257	3505 ± 1469 [41.907]	0.842 ± 0.080	0.398 [0.21, 0.62]
MyConnectome QB	98	1.587 ± 0.860	324 ± 176 [54.478]	0.619 ± 0.125	0.978 [0.96, 0.99]
MyConnectome QB	99	2.866 ± 1.360	1429 ± 928 [64.924]	0.718 ± 0.119	0.731 [0.55, 0.87]
MyConnectome QB	100	2.143 ± 1.391	202 ± 75 [36.938]	0.574 ± 0.105	0.908 [0.82, 0.96]
MyConnectome QB	101	1.132 ± 0.818	478 ± 200 [41.890]	0.802 ± 0.077	0.989 [0.98, 0.99]
MyConnectome QB	102	1.007 ± 0.591	394 ± 212 [53.996]	0.786 ± 0.088	0.934 [0.87, 0.97]
MyConnectome QB	103	1.737 ± 1.157	706 ± 375 [53.146]	0.787 ± 0.104	0.953 [0.91, 0.98]
MyConnectome QB	104	1.050 ± 0.747	1356 ± 734 [54.146]	0.798 ± 0.097	0.954 [0.91, 0.98]
MyConnectome QB	105	1.913 ± 1.268	338 ± 119 [35.179]	0.679 ± 0.094	0.965 [0.94, 0.98]
MyConnectome QB	106	1.973 ± 1.327	1861 ± 803 [43.129]	0.857 ± 0.085	0.909 [0.83, 0.96]
MyConnectome QB	107	2.035 ± 0.624	122 ± 48 [39.311]	0.482 ± 0.072	0.882 [0.80, 0.94]
MyConnectome QB	108	1.957 ± 0.638	129 ± 71 [54.935]	0.526 ± 0.096	0.957 [0.93, 0.98]
MyConnectome QB	109	2.926 ± 1.836	134 ± 179 [133.531]	0.487 ± 0.078	0.696 [0.50, 0.85]
MyConnectome QB	110	2.520 ± 1.142	106 ± 48 [45.249]	0.455 ± 0.081	0.865 [0.76, 0.94]
MyConnectome QB	111	1.808 ± 1.272	2221 ± 1366 [61.502]	0.867 ± 0.086	0.947 [0.89, 0.98]
MyConnectome QB	112	2.198 ± 1.066	111 ± 51 [45.673]	0.415 ± 0.108	0.909 [0.84, 0.96]
MyConnectome QB	113	1.312 ± 0.702	339 ± 226 [66.666]	0.710 ± 0.108	0.985 [0.97, 0.99]
MyConnectome QB	114	1.652 ± 0.858	300 ± 169 [56.296]	0.723 ± 0.117	0.960 [0.93, 0.98]
MyConnectome QB	115	2.194 ± 1.387	187 ± 122 [65.108]	0.618 ± 0.103	0.960 [0.93, 0.98]
MyConnectome QB	116	2.178 ± 1.450	460 ± 279 [60.559]	0.678 ± 0.120	0.586 [0.37, 0.78]
MyConnectome QB	117	2.048 ± 0.965	527 ± 295 [55.944]	0.742 ± 0.080	0.959 [0.93, 0.98]
MyConnectome QB	118	2.660 ± 1.156	57 ± 23 [40.858]	0.354 ± 0.063	0.826 [0.73, 0.91]
MyConnectome QB	119	2.556 ± 2.051	1846 ± 1143 [61.908]	0.784 ± 0.125	0.686 [0.48, 0.84]
MyConnectome QB	120	2.146 ± 1.226	331 ± 340 [102.670]	0.592 ± 0.134	0.498 [0.28, 0.72]
MyConnectome QB	121	3.363 ± 1.003	106 ± 54 [51.244]	0.358 ± 0.075	0.676 [0.52, 0.83]
MyConnectome QB	122	1.911 ± 0.617	54 ± 19 [35.434]	0.289 ± 0.053	0.830 [0.73, 0.91]
MyConnectome QB	123	1.101 ± 0.794	309 ± 127 [41.247]	0.699 ± 0.102	0.986 [0.97, 0.99]
MyConnectome QB	124	1.554 ± 0.669	87 ± 31 [36.089]	0.414 ± 0.074	0.950 [0.91, 0.98]
MyConnectome QB	125	0.949 ± 1.036	325 ± 68 [21.003]	0.790 ± 0.051	0.993 [0.99, 1.00]
MyConnectome QB	126	1.192 ± 0.949	2270 ± 1084 [47.771]	0.908 ± 0.078	0.971 [0.94, 0.99]
MyConnectome QB	127	1.272 ± 1.344	1241 ± 441 [35.543]	0.849 ± 0.070	0.903 [0.79, 0.96]
MyConnectome QB	128	0.983 ± 0.920	1554 ± 606 [39.013]	0.886 ± 0.088	0.970 [0.94, 0.99]
MyConnectome QB	129	2.389 ± 1.527	1224 ± 548 [44.757]	0.751 ± 0.104	0.586 [0.37, 0.78]
MyConnectome QB	130	2.327 ± 1.395	314 ± 124 [39.526]	0.629 ± 0.068	0.974 [0.95, 0.99]
MyConnectome QB	131	1.956 ± 1.587	3399 ± 1881 [55.353]	0.825 ± 0.135	0.772 [0.59, 0.89]
MyConnectome QB	132	2.542 ± 1.573	2818 ± 1532 [54.370]	0.829 ± 0.092	0.887 [0.76, 0.95]
MyConnectome QB	133	1.955 ± 1.429	1188 ± 814 [68.527]	0.803 ± 0.130	0.951 [0.90, 0.98]
MyConnectome QB	134	1.137 ± 0.694	370 ± 120 [32.325]	0.732 ± 0.090	0.991 [0.98, 1.00]
MyConnectome QB	135	2.168 ± 1.150	251 ± 162 [64.651]	0.524 ± 0.144	0.961 [0.93, 0.98]
MyConnectome QB	136	2.101 ± 0.839	48 ± 15 [31.036]	0.361 ± 0.060	0.926 [0.87, 0.96]
MyConnectome QB	137	1.795 ± 1.019	188 ± 80 [42.459]	0.623 ± 0.067	0.923 [0.87, 0.96]
MyConnectome QB	138	2.760 ± 1.391	202 ± 80 [39.346]	0.615 ± 0.065	0.943 [0.90, 0.97]
MyConnectome QB	139	1.151 ± 0.887	1487 ± 456 [30.650]	0.815 ± 0.048	0.912 [0.82, 0.96]
MyConnectome QB	140	2.837 ± 1.785	266 ± 152 [57.326]	0.585 ± 0.142	0.836 [0.73, 0.92]
MyConnectome QB	141	2.071 ± 1.425	281 ± 112 [39.850]	0.772 ± 0.039	0.967 [0.94, 0.98]
MyConnectome QB	142	0.788 ± 0.812	2057 ± 518 [25.181]	0.918 ± 0.049	0.978 [0.96, 0.99]
MyConnectome QB	143	1.846 ± 1.274	1285 ± 978 [76.111]	0.846 ± 0.097	0.923 [0.83, 0.97]
MyConnectome QB	144	1.042 ± 0.746	1927 ± 1171 [60.746]	0.918 ± 0.058	0.928 [0.85, 0.97]
MyConnectome QB	145	1.587 ± 0.564	114 ± 59 [52.019]	0.499 ± 0.087	0.951 [0.91, 0.98]
MyConnectome QB	146	0.911 ± 0.793	1717 ± 583 [33.979]	0.892 ± 0.049	0.851 [0.74, 0.93]
MyConnectome QB	147	-	-	-	-
MyConnectome QB	148	2.330 ± 1.120	1017 ± 1079 [106.160]	0.644 ± 0.143	0.758 [0.58, 0.88]
MyConnectome QB	149	1.644 ± 0.639	176 ± 115 [65.283]	0.551 ± 0.121	0.979 [0.96, 0.99]
MyConnectome QB	150	1.128 ± 1.213	1454 ± 549 [37.726]	0.871 ± 0.069	0.946 [0.88, 0.98]
MyConnectome QB	151	1.733 ± 1.260	1152 ± 741 [64.334]	0.784 ± 0.117	0.571 [0.35, 0.77]
MyConnectome QB	152	1.593 ± 1.261	617 ± 275 [44.555]	0.742 ± 0.106	0.767 [0.60, 0.89]
MyConnectome QB	153	1.914 ± 1.063	699 ± 431 [61.632]	0.694 ± 0.126	0.609 [0.39, 0.79]
MyConnectome QB	154	2.119 ± 0.981	1191 ± 762 [63.965]	0.766 ± 0.121	0.795 [0.61, 0.91]
MyConnectome QB	155	1.770 ± 0.952	147 ± 50 [34.221]	0.624 ± 0.086	0.918 [0.85, 0.96]
MyConnectome QB	156	2.448 ± 1.690	2260 ± 1192 [52.743]	0.841 ± 0.078	0.588 [0.36, 0.78]
MyConnectome QB	157	1.518 ± 0.964	2679 ± 1078 [40.222]	0.936 ± 0.045	0.955 [0.91, 0.98]
MyConnectome QB	158	1.791 ± 1.292	2097 ± 786 [37.482]	0.827 ± 0.080	0.802 [0.63, 0.91]
MyConnectome QB	159	2.340 ± 1.410	1879 ± 951 [50.611]	0.814 ± 0.120	0.846 [0.72, 0.93]
MyConnectome QB	160	1.588 ± 1.508	2570 ± 853 [33.193]	0.888 ± 0.049	0.223 [0.10, 0.42]
MyConnectome QB	161	0.903 ± 0.787	1272 ± 494 [38.813]	0.901 ± 0.062	0.922 [0.84, 0.97]
MyConnectome QB	162	2.489 ± 1.518	315 ± 206 [65.399]	0.661 ± 0.115	0.979 [0.96, 0.99]
MyConnectome QB	163	1.969 ± 1.018	222 ± 134 [60.600]	0.547 ± 0.148	0.807 [0.69, 0.90]
MyConnectome QB	164	2.202 ± 1.467	223 ± 99 [44.263]	0.587 ± 0.110	0.981 [0.97, 0.99]
MyConnectome QB	165	2.157 ± 1.309	354 ± 200 [56.484]	0.662 ± 0.104	0.984 [0.97, 0.99]
MyConnectome QB	166	1.809 ± 1.315	2107 ± 1339 [63.571]	0.801 ± 0.146	0.615 [0.41, 0.80]
MyConnectome QB	167	2.245 ± 1.149	164 ± 91 [55.406]	0.584 ± 0.107	0.981 [0.97, 0.99]
MyConnectome QB	168	2.105 ± 1.040	789 ± 546 [69.267]	0.687 ± 0.156	0.605 [0.42, 0.78]
MyConnectome QB	169	3.321 ± 1.185	132 ± 88 [66.303]	0.446 ± 0.116	0.972 [0.95, 0.99]
MyConnectome QB	170	2.905 ± 1.245	20 ± 8 [41.294]	0.145 ± 0.036	0.892 [0.82, 0.95]
MyConnectome QB	171	2.454 ± 1.776	2813 ± 1644 [58.462]	0.873 ± 0.093	0.940 [0.87, 0.98]
MyConnectome QB	172	2.035 ± 2.475	2996 ± 1250 [41.730]	0.850 ± 0.125	0.927 [0.86, 0.97]
MyConnectome QB	173	1.580 ± 1.062	873 ± 676 [77.414]	0.829 ± 0.087	0.885 [0.79, 0.95]
MyConnectome QB	174	0.623 ± 0.361	497 ± 126 [25.354]	0.828 ± 0.061	0.973 [0.95, 0.99]
MyConnectome QB	175	1.431 ± 1.390	583 ± 250 [42.886]	0.733 ± 0.106	0.890 [0.79, 0.95]
MyConnectome QB	176	1.958 ± 1.292	1478 ± 1072 [72.521]	0.810 ± 0.102	0.892 [0.80, 0.95]
MyConnectome QB	177	1.373 ± 1.110	614 ± 260 [42.396]	0.745 ± 0.123	0.984 [0.97, 0.99]
MyConnectome QB	178	2.420 ± 1.767	2434 ± 1425 [58.550]	0.852 ± 0.094	0.813 [0.66, 0.91]
MyConnectome QB	179	1.883 ± 0.849	187 ± 94 [50.234]	0.559 ± 0.108	0.986 [0.98, 0.99]
MyConnectome QB	180	3.037 ± 1.534	1174 ± 974 [83.013]	0.665 ± 0.165	0.350 [0.18, 0.58]
MyConnectome QB	181	2.539 ± 1.408	1169 ± 795 [68.030]	0.824 ± 0.106	0.844 [0.68, 0.93]
MyConnectome QB	182	3.408 ± 1.349	30 ± 14 [48.413]	0.290 ± 0.121	0.783 [0.66, 0.89]
MyConnectome QB	183	2.927 ± 1.341	782 ± 1030 [131.726]	0.556 ± 0.170	0.188 [0.08, 0.38]
MyConnectome QB	184	2.387 ± 1.994	2596 ± 1513 [58.269]	0.846 ± 0.108	0.924 [0.84, 0.97]
MyConnectome QB	185	0.886 ± 0.850	895 ± 261 [29.123]	0.891 ± 0.043	0.970 [0.94, 0.99]
MyConnectome QB	186	0.985 ± 0.885	335 ± 87 [25.871]	0.797 ± 0.048	0.993 [0.99, 1.00]
MyConnectome QB	187	3.116 ± 2.126	1769 ± 851 [48.105]	0.785 ± 0.087	0.691 [0.47, 0.85]
MyConnectome QB	188	2.275 ± 0.963	143 ± 66 [46.433]	0.558 ± 0.081	0.959 [0.93, 0.98]
MyConnectome QB	189	1.034 ± 0.903	2455 ± 546 [22.223]	0.924 ± 0.022	0.944 [0.88, 0.98]
MyConnectome QB	190	1.145 ± 1.059	2618 ± 1281 [48.918]	0.910 ± 0.056	0.892 [0.77, 0.95]
MyConnectome QB	191	1.398 ± 1.049	347 ± 98 [28.216]	0.692 ± 0.092	0.973 [0.95, 0.99]
MyConnectome QB	192	0.728 ± 0.500	387 ± 104 [26.773]	0.800 ± 0.069	0.995 [0.99, 1.00]
MyConnectome QB	193	1.855 ± 0.771	146 ± 99 [67.461]	0.473 ± 0.112	0.980 [0.96, 0.99]
MyConnectome QB	194	1.678 ± 1.254	915 ± 447 [48.804]	0.799 ± 0.101	0.726 [0.54, 0.86]
MyConnectome QB	195	2.162 ± 1.477	1412 ± 789 [55.874]	0.804 ± 0.111	0.788 [0.61, 0.90]
MyConnectome QB	196	2.599 ± 1.243	1359 ± 936 [68.868]	0.823 ± 0.120	0.646 [0.44, 0.82]
MyConnectome QB	197	2.006 ± 0.882	270 ± 175 [64.766]	0.665 ± 0.110	0.985 [0.97, 0.99]
MyConnectome QB	198	1.191 ± 0.983	1195 ± 610 [51.035]	0.874 ± 0.070	0.908 [0.82, 0.96]
MyConnectome QB	199	3.925 ± 2.235	2116 ± 1645 [77.767]	0.818 ± 0.114	0.500 [0.30, 0.71]
MyConnectome QB	200	1.462 ± 0.858	1253 ± 743 [59.281]	0.891 ± 0.062	0.823 [0.64, 0.92]
MyConnectome QB	201	2.193 ± 1.227	593 ± 422 [71.178]	0.720 ± 0.135	0.971 [0.95, 0.99]
MyConnectome QB	202	0.940 ± 0.845	955 ± 362 [37.894]	0.843 ± 0.103	0.984 [0.97, 0.99]
MyConnectome QB	203	1.967 ± 1.706	2955 ± 1656 [56.030]	0.848 ± 0.127	0.905 [0.80, 0.96]
MyConnectome QB	204	1.616 ± 0.702	154 ± 81 [52.946]	0.535 ± 0.104	0.977 [0.96, 0.99]
MyConnectome QB	205	1.863 ± 0.664	135 ± 74 [54.830]	0.468 ± 0.106	0.965 [0.94, 0.98]
MyConnectome QB	206	2.438 ± 1.529	2061 ± 982 [47.621]	0.826 ± 0.130	0.840 [0.69, 0.93]
MyConnectome QB	207	2.153 ± 1.676	1916 ± 1104 [57.622]	0.858 ± 0.087	0.873 [0.76, 0.94]
MyConnectome QB	208	3.535 ± 2.329	485 ± 740 [152.538]	0.495 ± 0.191	0.122 [0.05, 0.26]
MyConnectome QB	209	2.197 ± 0.816	241 ± 129 [53.544]	0.572 ± 0.110	0.854 [0.76, 0.93]
MyConnectome QB	210	1.989 ± 1.082	408 ± 220 [53.897]	0.688 ± 0.107	0.938 [0.89, 0.97]
MyConnectome QB	211	1.053 ± 1.302	2607 ± 893 [34.257]	0.921 ± 0.055	0.956 [0.91, 0.98]
MyConnectome QB	212	2.416 ± 1.192	142 ± 94 [66.293]	0.510 ± 0.094	0.913 [0.85, 0.96]
MyConnectome QB	213	1.357 ± 1.061	454 ± 208 [45.825]	0.839 ± 0.075	0.978 [0.96, 0.99]
MyConnectome QB	214	2.706 ± 0.847	101 ± 48 [47.139]	0.356 ± 0.075	0.903 [0.84, 0.95]
MyConnectome QB	215	2.038 ± 1.796	811 ± 397 [48.918]	0.731 ± 0.167	0.718 [0.57, 0.85]
MyConnectome QB	216	1.599 ± 1.366	346 ± 125 [36.231]	0.692 ± 0.089	0.976 [0.96, 0.99]
MyConnectome QB	217	2.776 ± 1.215	203 ± 116 [57.140]	0.521 ± 0.108	0.644 [0.47, 0.81]
MyConnectome QB	218	1.828 ± 0.590	328 ± 121 [36.837]	0.786 ± 0.037	0.974 [0.95, 0.99]
MyConnectome QB	219	1.964 ± 1.170	349 ± 200 [57.351]	0.733 ± 0.080	0.989 [0.98, 0.99]
MyConnectome QB	220	2.271 ± 1.356	2157 ± 971 [45.003]	0.774 ± 0.130	0.266 [0.12, 0.48]
MyConnectome QB	221	2.093 ± 1.468	1137 ± 561 [49.307]	0.760 ± 0.120	0.704 [0.52, 0.85]
MyConnectome QB	222	-	-	-	-
MyConnectome QB	223	1.295 ± 1.189	875 ± 288 [32.955]	0.867 ± 0.060	0.835 [0.69, 0.92]
MyConnectome QB	224	2.457 ± 1.740	873 ± 436 [49.964]	0.729 ± 0.120	0.700 [0.50, 0.85]
MyConnectome QB	225	2.582 ± 2.227	2836 ± 1594 [56.221]	0.828 ± 0.115	0.470 [0.26, 0.69]
MyConnectome QB	226	2.033 ± 0.999	195 ± 169 [86.718]	0.588 ± 0.119	0.985 [0.97, 0.99]
MyConnectome QB	227	1.942 ± 1.414	1468 ± 852 [58.016]	0.796 ± 0.117	0.819 [0.65, 0.92]
MyConnectome QB	228	2.163 ± 0.800	73 ± 31 [42.845]	0.362 ± 0.064	0.947 [0.91, 0.97]
MyConnectome QB	229	2.557 ± 0.752	173 ± 145 [83.933]	0.482 ± 0.131	0.902 [0.81, 0.96]
MyConnectome QB	230	1.147 ± 0.415	152 ± 51 [33.519]	0.600 ± 0.079	0.982 [0.97, 0.99]
MyConnectome QB	231	1.799 ± 1.003	264 ± 123 [46.723]	0.645 ± 0.119	0.964 [0.94, 0.98]
MyConnectome QB	232	1.041 ± 0.839	2504 ± 957 [38.206]	0.852 ± 0.072	0.930 [0.87, 0.97]
MyConnectome QB	233	1.039 ± 1.269	982 ± 253 [25.722]	0.866 ± 0.079	0.915 [0.84, 0.96]
MyConnectome QB	234	2.988 ± 1.880	2283 ± 1399 [61.276]	0.760 ± 0.126	0.202 [0.08, 0.40]
MyConnectome QB	235	1.885 ± 1.407	697 ± 313 [44.852]	0.749 ± 0.088	0.807 [0.63, 0.91]
MyConnectome QB	236	1.066 ± 0.628	549 ± 286 [52.003]	0.803 ± 0.091	0.994 [0.99, 1.00]
MyConnectome QB	237	1.365 ± 1.019	598 ± 206 [34.470]	0.769 ± 0.085	0.989 [0.98, 0.99]
MyConnectome QB	238	2.951 ± 2.677	817 ± 320 [39.104]	0.631 ± 0.128	0.130 [0.05, 0.28]
MyConnectome QB	239	1.765 ± 1.437	3064 ± 1407 [45.914]	0.810 ± 0.111	0.462 [0.26, 0.68]
MyConnectome QB	240	1.337 ± 1.300	3063 ± 1411 [46.081]	0.896 ± 0.064	0.852 [0.72, 0.93]
MyConnectome QB	241	2.175 ± 1.208	905 ± 581 [64.219]	0.742 ± 0.154	0.859 [0.73, 0.94]
MyConnectome QB	242	1.788 ± 1.444	1687 ± 992 [58.835]	0.822 ± 0.101	0.888 [0.78, 0.95]
MyConnectome QB	243	1.048 ± 1.019	1825 ± 901 [49.365]	0.852 ± 0.105	0.710 [0.51, 0.86]
MyConnectome QB	244	1.623 ± 1.297	6105 ± 1325 [21.707]	0.954 ± 0.018	0.698 [0.48, 0.85]
MyConnectome QB	245	1.444 ± 1.057	270 ± 90 [33.278]	0.680 ± 0.084	0.988 [0.98, 0.99]
MyConnectome QB	246	1.889 ± 0.720	242 ± 157 [65.152]	0.602 ± 0.124	0.870 [0.79, 0.94]
MyConnectome QB	247	1.545 ± 0.994	179 ± 72 [40.380]	0.580 ± 0.091	0.969 [0.95, 0.99]
MyConnectome QB	248	0.679 ± 0.573	1855 ± 652 [35.139]	0.905 ± 0.065	0.950 [0.89, 0.98]
MyConnectome QB	249	1.312 ± 0.616	89 ± 32 [35.647]	0.538 ± 0.098	0.914 [0.85, 0.96]
MyConnectome QB	250	2.287 ± 1.939	1417 ± 674 [47.570]	0.877 ± 0.077	0.520 [0.30, 0.73]
MyConnectome QB	251	2.692 ± 1.513	259 ± 178 [68.544]	0.461 ± 0.159	0.599 [0.40, 0.78]
MyConnectome QB	252	-	-	-	-
MyConnectome QB	253	2.471 ± 1.411	175 ± 93 [53.407]	0.538 ± 0.115	0.972 [0.95, 0.99]
MyConnectome QB	254	2.129 ± 1.724	1828 ± 894 [48.880]	0.738 ± 0.143	0.174 [0.08, 0.35]
MyConnectome QB	255	2.126 ± 0.650	128 ± 69 [54.169]	0.562 ± 0.079	0.897 [0.82, 0.95]
MyConnectome QB	256	2.020 ± 1.469	1562 ± 951 [60.884]	0.826 ± 0.112	0.958 [0.92, 0.98]
MyConnectome QB	257	1.618 ± 0.870	104 ± 30 [28.689]	0.491 ± 0.064	0.970 [0.95, 0.99]
MyConnectome QB	258	3.490 ± 0.937	30 ± 14 [47.606]	0.261 ± 0.069	0.703 [0.56, 0.84]
MyConnectome QB	259	2.018 ± 1.271	135 ± 46 [33.701]	0.617 ± 0.093	0.846 [0.75, 0.92]
MyConnectome QB	260	1.812 ± 1.149	569 ± 452 [79.402]	0.622 ± 0.160	0.695 [0.48, 0.85]
MyConnectome QB	261	1.471 ± 1.385	1250 ± 720 [57.609]	0.876 ± 0.081	0.861 [0.71, 0.94]
MyConnectome QB	262	0.563 ± 0.367	759 ± 95 [12.486]	0.916 ± 0.009	0.990 [0.98, 1.00]
MyConnectome QB	263	1.491 ± 1.129	129 ± 32 [25.047]	0.587 ± 0.079	0.978 [0.96, 0.99]
MyConnectome QB	264	2.982 ± 2.082	1681 ± 1111 [66.070]	0.753 ± 0.118	0.755 [0.57, 0.88]
MyConnectome QB	265	1.544 ± 1.243	1571 ± 832 [52.977]	0.862 ± 0.096	0.788 [0.63, 0.90]
MyConnectome QB	266	1.480 ± 1.210	2338 ± 921 [39.404]	0.913 ± 0.058	0.947 [0.90, 0.98]
MyConnectome QB	267	1.822 ± 1.039	124 ± 53 [42.694]	0.473 ± 0.090	0.948 [0.91, 0.98]
MyConnectome QB	268	3.025 ± 2.176	153 ± 194 [126.968]	0.420 ± 0.168	0.377 [0.21, 0.60]
MyConnectome QB	269	2.436 ± 1.686	602 ± 263 [43.701]	0.682 ± 0.122	0.841 [0.70, 0.93]
MyConnectome QB	270	1.580 ± 0.922	728 ± 296 [40.621]	0.728 ± 0.095	0.456 [0.26, 0.67]
MyConnectome QB	271	2.005 ± 1.424	3334 ± 1717 [51.482]	0.877 ± 0.097	0.867 [0.73, 0.94]
MyConnectome QB	272	1.704 ± 1.152	302 ± 158 [52.236]	0.653 ± 0.101	0.957 [0.91, 0.98]
MyConnectome QB	273	0.599 ± 0.509	1595 ± 419 [26.263]	0.841 ± 0.078	0.892 [0.81, 0.95]
MyConnectome QB	274	1.518 ± 0.832	342 ± 211 [61.773]	0.665 ± 0.128	0.989 [0.98, 0.99]
MyConnectome QB	275	1.926 ± 0.561	89 ± 25 [28.366]	0.381 ± 0.052	0.936 [0.89, 0.97]
MyConnectome QB	276	2.081 ± 1.426	3223 ± 1775 [55.050]	0.894 ± 0.056	0.885 [0.77, 0.95]
MyConnectome QB	277	2.012 ± 1.021	126 ± 63 [50.286]	0.482 ± 0.114	0.901 [0.83, 0.95]
MyConnectome QB	278	2.012 ± 1.675	2776 ± 1529 [55.075]	0.862 ± 0.093	0.723 [0.58, 0.85]
MyConnectome QB	279	1.081 ± 0.737	281 ± 99 [35.264]	0.762 ± 0.075	0.978 [0.96, 0.99]
MyConnectome QB	280	1.272 ± 0.704	236 ± 104 [44.042]	0.731 ± 0.064	0.958 [0.92, 0.98]
MyConnectome QB	281	2.555 ± 1.214	228 ± 169 [74.319]	0.555 ± 0.141	0.933 [0.89, 0.97]
MyConnectome QB	282	1.847 ± 0.863	139 ± 74 [53.021]	0.568 ± 0.097	0.963 [0.93, 0.98]
MyConnectome QB	283	2.707 ± 0.909	85 ± 51 [60.605]	0.370 ± 0.101	0.920 [0.86, 0.96]
MyConnectome QB	284	1.253 ± 0.590	357 ± 219 [61.301]	0.799 ± 0.090	0.957 [0.92, 0.98]
MyConnectome QB	285	2.594 ± 1.284	213 ± 125 [58.813]	0.607 ± 0.085	0.967 [0.94, 0.98]
MyConnectome QB	286	2.070 ± 0.981	289 ± 123 [42.622]	0.672 ± 0.091	0.970 [0.95, 0.99]
MyConnectome QB	287	2.668 ± 1.159	98 ± 64 [64.597]	0.328 ± 0.112	0.748 [0.61, 0.87]
MyConnectome QB	288	1.438 ± 0.746	1510 ± 901 [59.684]	0.848 ± 0.092	0.730 [0.54, 0.87]
MyConnectome QB	289	0.699 ± 0.795	2771 ± 331 [11.948]	0.948 ± 0.015	0.891 [0.77, 0.95]
MyConnectome QB	290	1.450 ± 1.124	1187 ± 552 [46.500]	0.791 ± 0.099	0.834 [0.71, 0.92]
MyConnectome QB	291	0.570 ± 0.392	1469 ± 389 [26.447]	0.839 ± 0.072	0.905 [0.82, 0.96]
MyConnectome QB	292	2.115 ± 0.989	420 ± 222 [52.852]	0.656 ± 0.148	0.464 [0.28, 0.68]
MyConnectome QB	293	1.336 ± 1.057	262 ± 78 [29.845]	0.645 ± 0.094	0.700 [0.54, 0.84]
MyConnectome QB	294	2.031 ± 0.827	141 ± 71 [50.358]	0.536 ± 0.099	0.970 [0.95, 0.99]
MyConnectome QB	295	1.762 ± 1.039	213 ± 86 [40.235]	0.627 ± 0.096	0.653 [0.48, 0.81]
MyConnectome QB	296	1.768 ± 1.032	322 ± 134 [41.554]	0.685 ± 0.113	0.985 [0.97, 0.99]
MyConnectome QB	297	1.215 ± 0.738	559 ± 359 [64.177]	0.802 ± 0.097	0.952 [0.91, 0.98]
MyConnectome QB	298	1.755 ± 0.821	131 ± 56 [43.221]	0.515 ± 0.108	0.903 [0.84, 0.95]
MyConnectome QB	299	1.995 ± 0.871	233 ± 147 [63.319]	0.611 ± 0.122	0.978 [0.96, 0.99]
MyConnectome QB	300	1.850 ± 0.781	562 ± 369 [65.702]	0.665 ± 0.132	0.781 [0.60, 0.90]
MyConnectome QB	301	1.598 ± 0.970	146 ± 47 [32.476]	0.606 ± 0.064	0.980 [0.96, 0.99]
MyConnectome QB	302	1.418 ± 0.843	334 ± 133 [39.788]	0.728 ± 0.092	0.987 [0.98, 0.99]
MyConnectome QB	303	3.078 ± 2.073	88 ± 44 [50.226]	0.376 ± 0.093	0.913 [0.85, 0.96]
MyConnectome QB	304	2.210 ± 1.816	3586 ± 2271 [63.326]	0.830 ± 0.106	0.739 [0.53, 0.88]
MyConnectome QB	305	3.408 ± 1.401	125 ± 67 [53.199]	0.383 ± 0.106	0.918 [0.86, 0.96]
MyConnectome QB	306	1.075 ± 0.602	418 ± 122 [29.123]	0.744 ± 0.088	0.974 [0.95, 0.99]
MyConnectome QB	307	2.119 ± 0.908	228 ± 196 [86.240]	0.579 ± 0.107	0.976 [0.96, 0.99]
MyConnectome QB	308	2.009 ± 1.607	2033 ± 1081 [53.187]	0.835 ± 0.107	0.743 [0.56, 0.88]
MyConnectome QB	309	2.062 ± 1.050	224 ± 113 [50.183]	0.599 ± 0.096	0.984 [0.97, 0.99]
MyConnectome QB	310	1.815 ± 0.933	278 ± 165 [59.462]	0.633 ± 0.118	0.967 [0.94, 0.98]
MyConnectome QB	311	1.291 ± 0.508	1013 ± 408 [40.274]	0.849 ± 0.059	0.893 [0.80, 0.95]
MyConnectome QB	312	2.338 ± 1.188	434 ± 269 [62.023]	0.662 ± 0.174	0.945 [0.91, 0.97]
MyConnectome QB	313	1.993 ± 1.249	336 ± 105 [31.185]	0.650 ± 0.058	0.878 [0.79, 0.94]
MyConnectome QB	314	2.023 ± 1.001	439 ± 223 [50.889]	0.661 ± 0.101	0.978 [0.96, 0.99]
MyConnectome QB	315	1.122 ± 0.623	327 ± 80 [24.383]	0.791 ± 0.041	0.975 [0.95, 0.99]
MyConnectome QB	316	1.545 ± 0.842	696 ± 358 [51.460]	0.788 ± 0.105	0.925 [0.85, 0.97]
MyConnectome QB	317	1.904 ± 0.889	71 ± 26 [36.455]	0.384 ± 0.056	0.872 [0.79, 0.94]
MyConnectome QB	318	2.405 ± 1.185	195 ± 115 [59.173]	0.569 ± 0.112	0.866 [0.78, 0.93]
MyConnectome QB	319	1.838 ± 1.243	1002 ± 700 [69.865]	0.794 ± 0.087	0.741 [0.54, 0.88]
MyConnectome QB	320	0.938 ± 0.757	584 ± 210 [35.984]	0.781 ± 0.093	0.941 [0.88, 0.97]
MyConnectome QB	321	2.091 ± 0.946	122 ± 96 [78.583]	0.533 ± 0.103	0.864 [0.76, 0.94]
MyConnectome QB	322	2.165 ± 0.938	444 ± 350 [78.679]	0.659 ± 0.141	0.955 [0.92, 0.98]
MyConnectome QB	323	1.604 ± 0.917	291 ± 142 [48.736]	0.676 ± 0.105	0.976 [0.96, 0.99]
MyConnectome QB	324	2.055 ± 1.159	3385 ± 1312 [38.762]	0.878 ± 0.058	0.556 [0.35, 0.75]
MyConnectome QB	325	2.359 ± 1.580	1436 ± 854 [59.457]	0.780 ± 0.136	0.820 [0.65, 0.92]
MyConnectome QB	326	1.010 ± 0.984	1783 ± 715 [40.106]	0.895 ± 0.049	0.843 [0.69, 0.93]
MyConnectome QB	327	1.592 ± 1.246	3907 ± 1089 [27.877]	0.916 ± 0.044	0.917 [0.81, 0.97]
MyConnectome QB	328	1.503 ± 1.400	3693 ± 1816 [49.180]	0.912 ± 0.082	0.953 [0.89, 0.98]
MyConnectome QB	329	2.317 ± 1.040	747 ± 488 [65.313]	0.714 ± 0.118	0.892 [0.80, 0.95]
MyConnectome QB	330	2.312 ± 1.614	219 ± 135 [61.579]	0.565 ± 0.131	0.931 [0.88, 0.97]
MyConnectome QB	331	2.506 ± 1.346	179 ± 71 [39.873]	0.544 ± 0.088	0.956 [0.92, 0.98]
MyConnectome QB	332	1.163 ± 0.819	662 ± 411 [62.080]	0.780 ± 0.114	0.898 [0.81, 0.95]
MyConnectome QB	333	2.155 ± 1.708	899 ± 487 [54.188]	0.693 ± 0.116	0.720 [0.51, 0.87]
MyConnectome QB	334	2.244 ± 1.693	443 ± 185 [41.738]	0.697 ± 0.095	0.819 [0.64, 0.92]
MyConnectome QB	335	1.576 ± 0.931	225 ± 104 [46.274]	0.665 ± 0.087	0.970 [0.95, 0.99]
MyConnectome QB	336	1.783 ± 1.103	696 ± 411 [59.069]	0.732 ± 0.173	0.865 [0.77, 0.93]
MyConnectome QB	337	1.299 ± 0.378	102 ± 25 [24.801]	0.487 ± 0.054	0.792 [0.68, 0.89]
MyConnectome QB	338	1.560 ± 0.710	120 ± 44 [36.555]	0.569 ± 0.082	0.967 [0.94, 0.98]
MyConnectome QB	339	1.286 ± 1.354	1762 ± 966 [54.801]	0.919 ± 0.048	0.895 [0.78, 0.96]
MyConnectome QB	340	2.124 ± 0.829	275 ± 167 [60.835]	0.637 ± 0.132	0.849 [0.75, 0.93]
MyConnectome QB	341	2.054 ± 0.724	321 ± 241 [75.139]	0.575 ± 0.146	0.978 [0.96, 0.99]
MyConnectome QB	342	1.982 ± 0.568	65 ± 18 [27.637]	0.321 ± 0.049	0.784 [0.65, 0.89]
MyConnectome QB	343	3.877 ± 3.217	6203 ± 3105 [50.057]	0.821 ± 0.106	0.648 [0.46, 0.81]
MyConnectome QB	344	1.396 ± 0.971	372 ± 145 [38.976]	0.762 ± 0.082	0.985 [0.97, 0.99]
MyConnectome QB	345	2.374 ± 1.100	408 ± 295 [72.207]	0.626 ± 0.126	0.846 [0.69, 0.93]
MyConnectome QB	346	2.968 ± 1.727	823 ± 909 [110.412]	0.569 ± 0.154	0.441 [0.24, 0.66]
MyConnectome QB	347	2.659 ± 0.856	59 ± 31 [53.562]	0.292 ± 0.074	0.857 [0.77, 0.93]
MyConnectome QB	348	2.089 ± 1.894	2641 ± 1451 [54.956]	0.827 ± 0.107	0.586 [0.37, 0.78]
MyConnectome QB	349	2.419 ± 1.113	217 ± 128 [59.103]	0.631 ± 0.102	0.966 [0.94, 0.98]
MyConnectome QB	350	1.949 ± 1.380	999 ± 695 [69.604]	0.792 ± 0.095	0.661 [0.45, 0.83]
MyConnectome QB	351	1.664 ± 0.813	373 ± 183 [49.135]	0.689 ± 0.115	0.883 [0.80, 0.94]
MyConnectome QB	352	1.529 ± 1.094	2080 ± 1100 [52.881]	0.817 ± 0.096	0.313 [0.17, 0.53]
MyConnectome QB	353	3.408 ± 0.889	69 ± 34 [48.874]	0.357 ± 0.080	0.872 [0.79, 0.94]
MyConnectome QB	354	1.646 ± 1.734	2199 ± 832 [37.857]	0.910 ± 0.057	0.936 [0.85, 0.97]
MyConnectome QB	355	1.778 ± 1.398	2133 ± 844 [39.545]	0.918 ± 0.039	0.897 [0.79, 0.96]
MyConnectome QB	356	1.587 ± 1.024	272 ± 144 [52.847]	0.649 ± 0.106	0.991 [0.98, 1.00]
MyConnectome QB	357	1.523 ± 1.332	3423 ± 1340 [39.149]	0.920 ± 0.064	0.862 [0.72, 0.94]
MyConnectome QB	358	2.182 ± 1.359	134 ± 58 [43.289]	0.489 ± 0.086	0.913 [0.85, 0.96]
MyConnectome QB	359	1.196 ± 0.568	248 ± 146 [58.847]	0.692 ± 0.106	0.987 [0.98, 0.99]
MyConnectome QB	360	1.321 ± 1.097	1911 ± 1034 [54.096]	0.784 ± 0.120	0.645 [0.44, 0.82]
MyConnectome QB	361	0.711 ± 1.106	4623 ± 963 [20.836]	0.955 ± 0.021	0.990 [0.98, 1.00]
MyConnectome QB	362	1.524 ± 1.073	388 ± 194 [49.997]	0.763 ± 0.080	0.947 [0.90, 0.98]
MyConnectome QB	363	2.583 ± 1.039	130 ± 120 [91.676]	0.442 ± 0.149	0.736 [0.59, 0.86]
MyConnectome QB	364	3.385 ± 1.474	307 ± 163 [53.142]	0.594 ± 0.109	0.851 [0.76, 0.93]
MyConnectome QB	365	1.467 ± 1.123	679 ± 400 [58.942]	0.741 ± 0.139	0.955 [0.92, 0.98]
MyConnectome QB	366	2.144 ± 1.285	4033 ± 1297 [32.152]	0.854 ± 0.084	0.829 [0.66, 0.92]
MyConnectome QB	367	4.628 ± 2.013	572 ± 397 [69.506]	0.485 ± 0.203	0.121 [0.05, 0.26]
MyConnectome QB	368	1.665 ± 1.265	1958 ± 1101 [56.241]	0.770 ± 0.123	0.265 [0.12, 0.48]
MyConnectome QB	369	1.005 ± 1.018	2008 ± 380 [18.948]	0.910 ± 0.029	0.923 [0.84, 0.97]
MyConnectome QB	370	2.127 ± 2.002	1383 ± 436 [31.537]	0.801 ± 0.064	0.721 [0.53, 0.86]
MyConnectome QB	371	2.128 ± 1.036	294 ± 174 [59.404]	0.671 ± 0.131	0.918 [0.86, 0.96]
MyConnectome QB	372	1.571 ± 1.007	1107 ± 691 [62.490]	0.853 ± 0.078	0.817 [0.66, 0.92]
MyConnectome QB	373	2.252 ± 0.623	63 ± 25 [40.035]	0.257 ± 0.063	0.890 [0.82, 0.95]
MyConnectome QB	374	2.427 ± 2.242	3593 ± 1395 [38.814]	0.818 ± 0.104	0.674 [0.50, 0.83]
MyConnectome QB	375	2.058 ± 0.734	45 ± 13 [28.037]	0.334 ± 0.054	0.765 [0.62, 0.88]
MyConnectome QB	376	6.737 ± 1.933	573 ± 488 [85.097]	0.484 ± 0.148	0.043 [0.01, 0.11]
MyConnectome QB	377	1.392 ± 1.271	467 ± 147 [31.541]	0.727 ± 0.093	0.980 [0.96, 0.99]
MyConnectome QB	378	2.026 ± 1.389	1572 ± 963 [61.271]	0.761 ± 0.127	0.636 [0.46, 0.80]
MyConnectome QB	379	4.917 ± 1.667	496 ± 397 [80.117]	0.562 ± 0.120	0.295 [0.14, 0.52]
MyConnectome QB	380	2.556 ± 1.484	481 ± 306 [63.647]	0.672 ± 0.118	0.895 [0.79, 0.95]
MyConnectome QB	381	2.652 ± 1.205	196 ± 122 [62.094]	0.591 ± 0.123	0.975 [0.96, 0.99]
MyConnectome QB	382	2.170 ± 0.835	58 ± 35 [60.102]	0.323 ± 0.100	0.957 [0.92, 0.98]
MyConnectome QB	383	2.880 ± 1.608	124 ± 56 [45.529]	0.459 ± 0.087	0.545 [0.35, 0.74]
MyConnectome QB	384	3.146 ± 1.322	36 ± 22 [60.578]	0.197 ± 0.073	0.864 [0.78, 0.93]
MyConnectome QB	385	2.153 ± 1.437	234 ± 120 [51.411]	0.556 ± 0.115	0.926 [0.87, 0.97]
MyConnectome QB	386	3.580 ± 1.527	1486 ± 815 [54.849]	0.869 ± 0.065	0.689 [0.46, 0.85]
MyConnectome QB	387	1.510 ± 1.044	803 ± 353 [43.964]	0.844 ± 0.098	0.903 [0.80, 0.96]
MyConnectome QB	388	2.233 ± 0.966	239 ± 148 [62.102]	0.634 ± 0.109	0.935 [0.89, 0.97]
MyConnectome QB	389	1.800 ± 0.582	79 ± 41 [52.088]	0.397 ± 0.093	0.957 [0.92, 0.98]
MyConnectome QB	390	1.346 ± 0.977	409 ± 131 [32.001]	0.744 ± 0.075	0.991 [0.98, 1.00]
MyConnectome QB	391	0.835 ± 0.708	875 ± 211 [24.179]	0.924 ± 0.029	0.932 [0.88, 0.97]
MyConnectome QB	392	1.083 ± 0.974	1336 ± 518 [38.780]	0.847 ± 0.084	0.906 [0.81, 0.96]
MyConnectome QB	393	1.730 ± 1.583	2056 ± 1084 [52.719]	0.855 ± 0.106	0.666 [0.43, 0.84]
MyConnectome QB	394	1.019 ± 0.990	2624 ± 965 [36.768]	0.906 ± 0.077	0.802 [0.62, 0.91]
MyConnectome QB	395	1.908 ± 1.257	1511 ± 840 [55.600]	0.832 ± 0.114	0.832 [0.69, 0.92]
MyConnectome QB	396	2.257 ± 1.392	4451 ± 2020 [45.373]	0.814 ± 0.107	0.164 [0.07, 0.34]
MyConnectome QB	397	3.501 ± 1.767	52 ± 22 [41.954]	0.425 ± 0.091	0.695 [0.52, 0.84]
[truncated: 1,202 more rows]
