# Supplementary material for: Assessing the Reliability of Template-Based Clustering for Tractography in Healthy Human Adults
Source: Front Neuroinform. 2022 Feb 17;16:777853. doi: 10.3389/fninf.2022.777853 (PMC8891507; doi:10.3389/fninf.2022.777853)
Supplement: Supplementary file 2 [file Table_2.XLSX]

## Sheet: Table S2
Table S2. Evaluated metrics and connectivity for all "U"-shaped clusters across the two datasets using spectral clustering, excluding cerebellar clusters. Lobular connectivity identified via Freesurfer parcellations, with hemispheres indicated by "R" or "L" for right and left hemispheres respectively. Tracts with at least one subject or session failing to cluster are indicated by the missing eval…
Dataset	Label	Euclidean Distance [mm] (avg ± sd)	Streamline Count (avg ± sd) [cv]	wDSC - Clusters (avg ± sd)	ICC [95% CI]	Connectivity
MyConnectome	0	2.051 ± 0.378	254 ± 88 [34.544]	0.869 ± 0.050	0.977 [0.95, 0.99]	R Frontal - R Parietal
MyConnectome	1	2.658 ± 0.510	129 ± 44 [33.957]	0.688 ± 0.061	0.971 [0.95, 0.99]	L Frontal - L Frontal
MyConnectome	2	1.741 ± 0.387	254 ± 77 [30.477]	0.785 ± 0.072	0.987 [0.98, 0.99]	L Frontal - L Frontal
MyConnectome	3	6.722 ± 3.240	618 ± 135 [21.758]	0.679 ± 0.066	0.974 [0.95, 0.99]	R Frontal - R Temporal
MyConnectome	4	1.896 ± 0.494	165 ± 65 [39.463]	0.813 ± 0.062	0.969 [0.94, 0.99]	R Frontal - R Frontal
MyConnectome	5	2.221 ± 0.791	352 ± 72 [20.323]	0.832 ± 0.051	0.989 [0.98, 1.00]	L Occipital - L Occipital
MyConnectome	6	2.614 ± 0.576	219 ± 82 [37.290]	0.772 ± 0.068	0.968 [0.94, 0.99]	R Frontal - R Frontal
MyConnectome	7	2.109 ± 0.341	94 ± 31 [33.177]	0.779 ± 0.052	0.976 [0.96, 0.99]	L Parietal - L Parietal
MyConnectome	8	2.892 ± 0.502	183 ± 58 [31.779]	0.751 ± 0.058	0.972 [0.95, 0.99]	L Frontal - L Frontal
MyConnectome	9	2.758 ± 0.389	280 ± 136 [48.579]	0.868 ± 0.063	0.983 [0.97, 0.99]	R Frontal - R Frontal
MyConnectome	10	3.083 ± 0.580	94 ± 25 [26.235]	0.781 ± 0.042	0.989 [0.98, 1.00]	L Parietal - L Parietal
MyConnectome	11	2.687 ± 0.552	72 ± 22 [29.799]	0.718 ± 0.066	0.972 [0.95, 0.99]	L Parietal - L Parietal
MyConnectome	12	2.626 ± 1.158	267 ± 60 [22.475]	0.715 ± 0.055	0.964 [0.93, 0.98]	R Occipital - R Occipital
MyConnectome	13	3.136 ± 0.398	213 ± 94 [44.124]	0.804 ± 0.084	0.985 [0.97, 0.99]	L Frontal - L Frontal
MyConnectome	14	2.275 ± 0.321	139 ± 52 [37.507]	0.775 ± 0.069	0.988 [0.98, 0.99]	L Frontal - L Frontal
MyConnectome	15	2.231 ± 0.564	106 ± 43 [40.383]	0.649 ± 0.117	0.977 [0.96, 0.99]	R Frontal - R Frontal
MyConnectome	16	2.956 ± 0.832	72 ± 27 [37.881]	0.663 ± 0.081	0.973 [0.95, 0.99]	R Parietal - R Parietal
MyConnectome	17	2.325 ± 0.512	97 ± 41 [42.347]	0.738 ± 0.092	0.968 [0.94, 0.99]	L Parietal - L Parietal
MyConnectome	18	2.528 ± 0.362	160 ± 47 [29.252]	0.748 ± 0.046	0.981 [0.96, 0.99]	L Frontal - L Parietal
MyConnectome	19	2.475 ± 0.932	280 ± 128 [45.749]	0.728 ± 0.129	0.977 [0.95, 0.99]	R Temporal - R Temporal
MyConnectome	20	2.955 ± 1.240	292 ± 89 [30.303]	0.744 ± 0.097	0.989 [0.98, 1.00]	L Frontal - L Frontal
MyConnectome	21	2.335 ± 0.618	86 ± 34 [39.716]	0.636 ± 0.093	0.970 [0.94, 0.99]	R Frontal - R Frontal
MyConnectome	22	2.269 ± 0.791	439 ± 132 [30.058]	0.863 ± 0.065	0.995 [0.99, 1.00]	R Parietal - R Parietal
MyConnectome	23	1.912 ± 0.750	475 ± 114 [24.010]	0.771 ± 0.044	0.990 [0.98, 1.00]	L Temporal - L Temporal
MyConnectome	24	2.060 ± 0.637	268 ± 60 [22.383]	0.828 ± 0.051	0.995 [0.99, 1.00]	R Frontal - R Frontal
MyConnectome	25	2.830 ± 0.380	165 ± 54 [32.471]	0.805 ± 0.080	0.982 [0.96, 0.99]	L Frontal - L Frontal
MyConnectome	26	2.088 ± 0.554	130 ± 44 [33.653]	0.720 ± 0.083	0.976 [0.96, 0.99]	L Frontal - L Frontal
MyConnectome	27	2.236 ± 0.284	90 ± 36 [39.337]	0.721 ± 0.067	0.977 [0.96, 0.99]	L Frontal - L Frontal
MyConnectome	28	2.320 ± 0.305	147 ± 35 [23.415]	0.829 ± 0.052	0.978 [0.96, 0.99]	L Parietal - L Parietal
MyConnectome	29	2.447 ± 0.881	333 ± 125 [37.613]	0.853 ± 0.067	0.987 [0.97, 0.99]	R Parietal - R Temporal
MyConnectome	30	2.571 ± 1.034	275 ± 108 [39.182]	0.713 ± 0.081	0.985 [0.97, 0.99]	R Occipital - R Occipital
MyConnectome	31	2.259 ± 0.596	139 ± 39 [27.767]	0.670 ± 0.042	0.947 [0.89, 0.98]	R Temporal - R Temporal
MyConnectome	32	1.911 ± 0.373	68 ± 19 [28.599]	0.736 ± 0.056	0.980 [0.96, 0.99]	L Frontal - L Parietal
MyConnectome	33	1.987 ± 0.633	253 ± 60 [23.940]	0.886 ± 0.045	0.985 [0.97, 0.99]	R Occipital - R Occipital
MyConnectome	34	2.548 ± 0.915	184 ± 74 [40.263]	0.679 ± 0.086	0.978 [0.96, 0.99]	R Temporal - R Temporal
MyConnectome	35	2.097 ± 2.114	257 ± 65 [25.315]	0.783 ± 0.077	0.983 [0.97, 0.99]	L Occipital - L Occipital
MyConnectome	36	1.207 ± 0.511	115 ± 30 [25.932]	0.756 ± 0.056	0.979 [0.96, 0.99]	L Frontal - L Frontal
MyConnectome	37	3.607 ± 0.856	152 ± 65 [42.698]	0.813 ± 0.079	0.987 [0.98, 0.99]	L Frontal - L Frontal
MyConnectome	38	2.678 ± 0.484	156 ± 51 [32.666]	0.740 ± 0.050	0.970 [0.94, 0.99]	R Frontal - R Frontal
MyConnectome	39	2.255 ± 0.716	226 ± 103 [45.627]	0.795 ± 0.093	0.988 [0.98, 0.99]	L Parietal - L Parietal
MyConnectome	40	2.949 ± 0.630	80 ± 27 [34.324]	0.717 ± 0.079	0.974 [0.95, 0.99]	L Parietal - L Parietal
MyConnectome	41	2.278 ± 0.508	390 ± 134 [34.453]	0.818 ± 0.096	0.992 [0.98, 1.00]	R Parietal - R Parietal
MyConnectome	42	3.271 ± 1.473	54 ± 39 [71.244]	0.350 ± 0.098	0.595 [0.40, 0.78]	Cerebellum
MyConnectome	43	1.928 ± 0.538	100 ± 39 [39.208]	0.681 ± 0.102	0.977 [0.96, 0.99]	L Parietal - L Occipital
MyConnectome	44	2.075 ± 0.298	134 ± 65 [48.252]	0.772 ± 0.091	0.982 [0.97, 0.99]	L Frontal - L Frontal
MyConnectome	45	2.575 ± 0.410	607 ± 131 [21.575]	0.840 ± 0.045	0.956 [0.91, 0.98]	L Occipital - L Occipital
MyConnectome	46	2.315 ± 0.377	182 ± 74 [40.500]	0.810 ± 0.083	0.987 [0.98, 0.99]	R Frontal - R Frontal
MyConnectome	47	3.450 ± 0.633	109 ± 39 [35.489]	0.707 ± 0.071	0.972 [0.95, 0.99]	R Temporal - R Temporal
MyConnectome	48	2.517 ± 0.415	80 ± 26 [32.140]	0.700 ± 0.063	0.978 [0.96, 0.99]	R Frontal - R Frontal
MyConnectome	49	2.017 ± 0.256	43 ± 15 [34.383]	0.706 ± 0.063	0.965 [0.94, 0.98]	L Frontal - L Parietal
MyConnectome	50	2.322 ± 0.540	180 ± 63 [34.980]	0.756 ± 0.070	0.986 [0.97, 0.99]	L Temporal - L Temporal
MyConnectome	51	2.475 ± 0.605	127 ± 43 [33.872]	0.672 ± 0.074	0.959 [0.93, 0.98]	L Frontal - L Frontal
MyConnectome	52	1.900 ± 0.661	254 ± 59 [23.174]	0.779 ± 0.088	0.985 [0.97, 0.99]	L Temporal - L Temporal
MyConnectome	53	1.774 ± 0.644	77 ± 32 [41.373]	0.705 ± 0.080	0.976 [0.96, 0.99]	L Frontal - L Parietal
MyConnectome	54	2.184 ± 0.482	74 ± 18 [24.468]	0.693 ± 0.040	0.976 [0.96, 0.99]	R Temporal - R Temporal
MyConnectome	55	2.237 ± 0.568	76 ± 31 [40.633]	0.708 ± 0.082	0.980 [0.96, 0.99]	R Frontal - R Frontal
MyConnectome	56	2.472 ± 0.456	95 ± 26 [27.917]	0.667 ± 0.055	0.973 [0.95, 0.99]	L Parietal - L Temporal
MyConnectome	57	2.520 ± 0.427	170 ± 64 [37.785]	0.801 ± 0.089	0.985 [0.97, 0.99]	L Frontal - L Frontal
MyConnectome	58	1.767 ± 0.728	105 ± 45 [43.153]	0.661 ± 0.092	0.974 [0.95, 0.99]	R Parietal - R Parietal
MyConnectome	59	1.555 ± 0.649	268 ± 51 [19.076]	0.819 ± 0.037	0.995 [0.99, 1.00]	L Parietal - L Parietal
MyConnectome	60	3.687 ± 1.841	166 ± 54 [32.522]	0.554 ± 0.079	0.945 [0.89, 0.98]	R Temporal - R Temporal
MyConnectome	61	1.979 ± 0.420	157 ± 67 [42.863]	0.792 ± 0.079	0.982 [0.97, 0.99]	R Parietal - R Parietal
MyConnectome	62	2.146 ± 0.853	133 ± 70 [52.712]	0.680 ± 0.126	0.981 [0.97, 0.99]	L Frontal - L Frontal
MyConnectome	63	2.203 ± 0.720	265 ± 91 [34.181]	0.745 ± 0.125	0.988 [0.98, 1.00]	R Frontal - R Frontal
MyConnectome	64	1.923 ± 0.359	153 ± 55 [35.969]	0.801 ± 0.060	0.984 [0.97, 0.99]	L Frontal - L Parietal
MyConnectome	65	2.290 ± 0.695	100 ± 36 [36.409]	0.640 ± 0.097	0.965 [0.93, 0.98]	L Frontal - L Frontal
MyConnectome	66	1.832 ± 0.821	199 ± 39 [19.507]	0.776 ± 0.048	0.993 [0.99, 1.00]	L Parietal - L Parietal
MyConnectome	67	3.160 ± 0.615	113 ± 25 [21.934]	0.727 ± 0.038	0.975 [0.95, 0.99]	L Parietal - L Parietal
MyConnectome	68	2.577 ± 0.629	122 ± 42 [34.732]	0.735 ± 0.083	0.971 [0.95, 0.99]	L Frontal - L Frontal
MyConnectome	69	2.996 ± 0.513	99 ± 44 [44.693]	0.685 ± 0.138	0.967 [0.94, 0.98]	L Parietal - L Parietal
MyConnectome	70	1.875 ± 0.488	41 ± 12 [29.702]	0.563 ± 0.078	0.971 [0.95, 0.99]	R Parietal - R Parietal
MyConnectome	71	2.201 ± 0.386	126 ± 31 [24.874]	0.760 ± 0.056	0.981 [0.97, 0.99]	L Temporal - L Temporal
MyConnectome	72	2.825 ± 0.762	39 ± 13 [31.900]	0.520 ± 0.074	0.960 [0.93, 0.98]	L Parietal - L Parietal
MyConnectome	73	2.206 ± 0.591	213 ± 44 [20.892]	0.773 ± 0.062	0.992 [0.98, 1.00]	L Parietal - L Parietal
MyConnectome	74	1.822 ± 0.520	233 ± 84 [35.942]	0.778 ± 0.109	0.986 [0.97, 0.99]	R Occipital - R Occipital
MyConnectome	75	2.615 ± 0.468	86 ± 27 [31.753]	0.758 ± 0.064	0.974 [0.95, 0.99]	R Parietal - R Parietal
MyConnectome	76	1.677 ± 0.336	38 ± 13 [34.616]	0.586 ± 0.077	0.967 [0.94, 0.98]	R Frontal - R Parietal
MyConnectome	77	2.177 ± 0.698	48 ± 12 [26.020]	0.473 ± 0.059	0.973 [0.95, 0.99]	L Parietal - L Parietal
MyConnectome	78	2.428 ± 0.861	85 ± 29 [34.245]	0.684 ± 0.091	0.963 [0.93, 0.98]	R Frontal - R Frontal
MyConnectome	79	2.287 ± 0.348	172 ± 61 [35.536]	0.791 ± 0.087	0.969 [0.94, 0.99]	L Frontal - L Frontal
MyConnectome	80	2.905 ± 0.251	58 ± 21 [36.525]	0.737 ± 0.075	0.971 [0.95, 0.99]	R Frontal - R Parietal
MyConnectome	81	2.295 ± 0.643	117 ± 28 [23.802]	0.732 ± 0.074	0.987 [0.98, 0.99]	L Parietal - L Parietal
MyConnectome	82	2.225 ± 0.364	53 ± 19 [36.751]	0.630 ± 0.098	0.962 [0.93, 0.98]	L Frontal - L Parietal
MyConnectome	83	1.362 ± 0.323	47 ± 23 [48.347]	0.656 ± 0.082	0.967 [0.94, 0.98]	L Frontal - L Frontal
MyConnectome	84	2.110 ± 0.430	92 ± 38 [40.853]	0.702 ± 0.096	0.977 [0.96, 0.99]	R Frontal - R Frontal
MyConnectome	85	1.534 ± 0.297	328 ± 63 [19.217]	0.837 ± 0.024	0.987 [0.98, 0.99]	L Parietal - L Cingulate
MyConnectome	86	2.597 ± 0.448	64 ± 17 [26.831]	0.628 ± 0.060	0.974 [0.95, 0.99]	L Parietal - L Parietal
MyConnectome	87	1.856 ± 0.647	42 ± 13 [30.971]	0.572 ± 0.076	0.970 [0.95, 0.99]	L Frontal - L Frontal
MyConnectome	88	2.685 ± 0.391	36 ± 11 [30.518]	0.576 ± 0.059	0.954 [0.92, 0.98]	R Parietal - R Parietal
MyConnectome	89	3.670 ± 0.325	99 ± 32 [32.409]	0.765 ± 0.063	0.983 [0.97, 0.99]	R Parietal - R Parietal
MyConnectome	90	3.179 ± 0.696	116 ± 46 [39.787]	0.684 ± 0.121	0.969 [0.94, 0.99]	R Frontal - R Frontal
MyConnectome	91	2.771 ± 1.195	120 ± 60 [50.319]	0.569 ± 0.130	0.973 [0.95, 0.99]	L Frontal - L Frontal
MyConnectome	92	2.911 ± 0.599	91 ± 29 [31.693]	0.626 ± 0.065	0.962 [0.93, 0.98]	L Frontal - L Frontal
MyConnectome	93	2.659 ± 0.516	32 ± 12 [37.667]	0.475 ± 0.087	0.951 [0.90, 0.98]	R Parietal - R Parietal
MyConnectome	94	3.459 ± 0.916	110 ± 48 [43.476]	0.609 ± 0.101	0.921 [0.85, 0.96]	L Parietal - L Parietal
MyConnectome	95	3.265 ± 0.515	112 ± 32 [28.335]	0.698 ± 0.083	0.957 [0.92, 0.98]	R Parietal - R Temporal
MyConnectome	96	2.113 ± 0.698	147 ± 62 [42.076]	0.709 ± 0.162	0.982 [0.96, 0.99]	R Parietal - R Parietal
MyConnectome	97	2.277 ± 0.538	135 ± 51 [37.717]	0.693 ± 0.117	0.981 [0.97, 0.99]	R Frontal - R Frontal
MyConnectome	98	2.087 ± 0.650	198 ± 47 [23.890]	0.739 ± 0.052	0.991 [0.98, 1.00]	L Temporal - L Temporal
MyConnectome	99	1.618 ± 0.669	173 ± 33 [19.346]	0.784 ± 0.071	0.993 [0.99, 1.00]	L Parietal - L Parietal
MyConnectome	100	3.866 ± 2.910	302 ± 97 [32.073]	0.606 ± 0.106	0.976 [0.95, 0.99]	L Temporal - L Temporal
MyConnectome	101	2.723 ± 0.469	104 ± 44 [41.989]	0.692 ± 0.080	0.975 [0.96, 0.99]	L Temporal - L Temporal
MyConnectome	102	3.281 ± 0.687	76 ± 30 [39.638]	0.603 ± 0.117	0.959 [0.93, 0.98]	R Frontal - R Frontal
MyConnectome	103	2.556 ± 0.753	104 ± 40 [38.547]	0.624 ± 0.086	0.933 [0.87, 0.97]	R Frontal - R Frontal
MyConnectome	104	3.278 ± 0.846	115 ± 37 [32.492]	0.795 ± 0.068	0.983 [0.97, 0.99]	L Parietal - L Parietal
MyConnectome	105	2.266 ± 0.340	150 ± 60 [39.908]	0.776 ± 0.098	0.983 [0.97, 0.99]	L Frontal - L Frontal
MyConnectome	106	2.476 ± 0.405	38 ± 12 [31.467]	0.541 ± 0.079	0.965 [0.94, 0.98]	L Frontal - L Parietal
MyConnectome	107	2.281 ± 0.567	88 ± 33 [37.161]	0.729 ± 0.074	0.979 [0.96, 0.99]	R Frontal - R Frontal
MyConnectome	108	2.589 ± 0.422	132 ± 32 [24.062]	0.823 ± 0.033	0.980 [0.96, 0.99]	R Frontal - R Frontal
MyConnectome	109	2.087 ± 0.359	72 ± 20 [28.460]	0.745 ± 0.062	0.975 [0.96, 0.99]	R Parietal - R Parietal
MyConnectome	110	3.852 ± 0.962	91 ± 31 [33.576]	0.685 ± 0.090	0.981 [0.97, 0.99]	R Frontal - R Frontal
MyConnectome	111	2.943 ± 0.264	116 ± 40 [34.125]	0.823 ± 0.073	0.984 [0.97, 0.99]	L Parietal - L Parietal
MyConnectome	112	3.884 ± 2.019	263 ± 108 [41.159]	0.640 ± 0.152	0.970 [0.95, 0.99]	R Temporal - R Temporal
MyConnectome	113	2.254 ± 0.419	161 ± 39 [24.432]	0.814 ± 0.060	0.984 [0.97, 0.99]	R Frontal - R Frontal
MyConnectome	114	2.380 ± 0.396	69 ± 35 [50.556]	0.650 ± 0.148	0.966 [0.94, 0.98]	L Frontal - L Parietal
MyConnectome	115	2.879 ± 0.467	54 ± 19 [34.452]	0.658 ± 0.090	0.965 [0.94, 0.98]	R Parietal - R Parietal
MyConnectome	116	1.957 ± 0.718	89 ± 29 [32.625]	0.649 ± 0.082	0.971 [0.95, 0.99]	R Frontal - R Parietal
MyConnectome	117	2.630 ± 0.823	66 ± 22 [33.159]	0.651 ± 0.076	0.970 [0.94, 0.99]	L Frontal - L Frontal
MyConnectome	118	2.497 ± 0.471	41 ± 13 [30.380]	0.563 ± 0.079	0.965 [0.94, 0.98]	L Frontal - L Frontal
MyConnectome	119	2.522 ± 1.297	120 ± 46 [38.556]	0.512 ± 0.104	0.944 [0.89, 0.98]	L Frontal - L Frontal
MyConnectome	120	2.226 ± 0.556	92 ± 25 [26.839]	0.757 ± 0.050	0.982 [0.97, 0.99]	L Parietal - L Parietal
MyConnectome	121	1.505 ± 0.565	67 ± 26 [38.033]	0.552 ± 0.106	0.970 [0.94, 0.99]	L Frontal - L Frontal
MyConnectome	122	2.125 ± 0.473	17 ± 5 [28.369]	0.405 ± 0.062	0.968 [0.94, 0.99]	R Parietal - R Parietal
MyConnectome	123	2.141 ± 1.092	120 ± 48 [39.652]	0.665 ± 0.125	0.978 [0.96, 0.99]	L Parietal - L Occipital
MyConnectome	124	2.652 ± 0.613	65 ± 19 [29.325]	0.668 ± 0.072	0.971 [0.95, 0.99]	L Parietal - L Parietal
MyConnectome	125	2.439 ± 0.349	51 ± 18 [35.575]	0.568 ± 0.088	0.951 [0.90, 0.98]	R Temporal - R Temporal
MyConnectome	126	1.796 ± 1.001	167 ± 49 [29.560]	0.741 ± 0.079	0.977 [0.96, 0.99]	R Occipital - R Occipital
MyConnectome	127	2.045 ± 0.294	65 ± 26 [40.144]	0.618 ± 0.108	0.973 [0.95, 0.99]	R Parietal - R Parietal
MyConnectome	128	1.916 ± 0.390	135 ± 19 [14.277]	0.766 ± 0.025	0.990 [0.98, 1.00]	L Parietal - L Parietal
MyConnectome	129	2.257 ± 0.785	161 ± 46 [28.668]	0.813 ± 0.060	0.988 [0.98, 0.99]	R Frontal - R Frontal
MyConnectome	130	3.678 ± 0.941	29 ± 13 [45.768]	0.339 ± 0.095	0.930 [0.88, 0.97]	R Frontal - R Parietal
MyConnectome	131	2.625 ± 0.535	76 ± 23 [30.658]	0.616 ± 0.063	0.962 [0.93, 0.98]	L Parietal - L Temporal
MyConnectome	132	2.477 ± 0.595	18 ± 5 [30.133]	0.253 ± 0.041	0.937 [0.89, 0.97]	L Frontal - L Frontal
MyConnectome	133	3.200 ± 0.843	36 ± 16 [44.466]	0.307 ± 0.079	0.857 [0.74, 0.93]	L Temporal - L Temporal
MyConnectome	134	2.632 ± 0.414	70 ± 24 [34.221]	0.662 ± 0.108	0.967 [0.94, 0.98]	R Parietal - R Parietal
MyConnectome	135	2.190 ± 0.586	32 ± 10 [31.391]	0.569 ± 0.094	0.930 [0.88, 0.97]	R Frontal - R Frontal
MyConnectome	136	2.923 ± 0.411	51 ± 17 [32.510]	0.746 ± 0.072	0.976 [0.96, 0.99]	L Frontal - L Parietal
MyConnectome	137	2.147 ± 0.541	159 ± 68 [43.117]	0.773 ± 0.078	0.966 [0.94, 0.98]	R Frontal - R Frontal
MyConnectome	138	3.449 ± 1.497	73 ± 26 [34.868]	0.484 ± 0.109	0.951 [0.91, 0.98]	R Frontal - R Frontal
MyConnectome	139	2.826 ± 1.178	192 ± 54 [28.218]	0.692 ± 0.054	0.973 [0.95, 0.99]	L Occipital - L Occipital
MyConnectome	140	2.105 ± 0.565	87 ± 38 [44.204]	0.727 ± 0.122	0.982 [0.97, 0.99]	R Parietal - R Parietal
MyConnectome	141	3.458 ± 0.326	94 ± 31 [32.881]	0.801 ± 0.064	0.975 [0.96, 0.99]	L Frontal - L Frontal
MyConnectome	142	3.702 ± 1.013	30 ± 9 [28.706]	0.452 ± 0.078	0.964 [0.94, 0.98]	L Parietal - L Parietal
MyConnectome	143	1.507 ± 0.506	67 ± 25 [36.499]	0.679 ± 0.089	0.969 [0.95, 0.99]	R Frontal - R Frontal
MyConnectome	144	2.700 ± 0.659	118 ± 41 [35.017]	0.663 ± 0.122	0.973 [0.95, 0.99]	R Frontal - R Frontal
MyConnectome	145	3.480 ± 1.075	109 ± 41 [38.071]	0.462 ± 0.052	0.643 [0.42, 0.82]	Cerebellum
MyConnectome	146	2.725 ± 0.704	120 ± 46 [38.437]	0.628 ± 0.104	0.956 [0.92, 0.98]	L Frontal - L Frontal
MyConnectome	147	2.389 ± 0.966	134 ± 44 [32.846]	0.742 ± 0.087	0.981 [0.96, 0.99]	L Frontal - L Frontal
MyConnectome	148	2.188 ± 0.464	52 ± 18 [34.959]	0.728 ± 0.095	0.975 [0.95, 0.99]	L Frontal - L Frontal
MyConnectome	149	1.761 ± 0.583	150 ± 23 [15.252]	0.744 ± 0.033	0.989 [0.98, 0.99]	L Parietal - L Parietal
MyConnectome	150	4.126 ± 0.690	34 ± 13 [37.086]	0.491 ± 0.081	0.937 [0.89, 0.97]	R Parietal - R Parietal
MyConnectome	151	1.330 ± 0.543	39 ± 11 [27.594]	0.623 ± 0.079	0.969 [0.94, 0.99]	R Parietal - R Parietal
MyConnectome	152	1.977 ± 0.226	208 ± 57 [27.626]	0.897 ± 0.033	0.992 [0.98, 1.00]	L Frontal - L Frontal
MyConnectome	153	2.825 ± 0.428	25 ± 9 [37.379]	0.449 ± 0.073	0.940 [0.90, 0.97]	R Frontal - R Frontal
MyConnectome	154	2.410 ± 0.836	56 ± 17 [30.732]	0.610 ± 0.061	0.979 [0.96, 0.99]	R Frontal - R Frontal
MyConnectome	155	2.401 ± 0.501	182 ± 63 [34.578]	0.810 ± 0.109	0.985 [0.97, 0.99]	R Frontal - R Frontal
MyConnectome	156	2.206 ± 0.564	68 ± 28 [41.501]	0.644 ± 0.102	0.957 [0.92, 0.98]	R Frontal - R Frontal
MyConnectome	157	2.729 ± 0.452	148 ± 72 [48.684]	0.829 ± 0.085	0.977 [0.96, 0.99]	R Frontal - R Frontal
MyConnectome	158	3.727 ± 0.236	49 ± 20 [41.873]	0.719 ± 0.089	0.959 [0.93, 0.98]	L Frontal - L Parietal
MyConnectome	159	2.401 ± 0.598	30 ± 10 [33.672]	0.412 ± 0.072	0.938 [0.88, 0.97]	L Frontal - L Frontal
MyConnectome	160	3.440 ± 0.590	86 ± 37 [43.137]	0.682 ± 0.112	0.953 [0.92, 0.98]	L Frontal - L Frontal
MyConnectome	161	2.442 ± 0.995	237 ± 126 [53.347]	0.685 ± 0.144	0.993 [0.99, 1.00]	L Frontal - L Frontal
MyConnectome	162	1.679 ± 0.180	64 ± 19 [30.419]	0.761 ± 0.073	0.978 [0.96, 0.99]	L Frontal - L Frontal
MyConnectome	163	1.897 ± 0.287	54 ± 20 [36.451]	0.683 ± 0.094	0.970 [0.95, 0.99]	L Frontal - L Frontal
MyConnectome	164	2.540 ± 0.529	76 ± 32 [42.744]	0.686 ± 0.116	0.958 [0.92, 0.98]	L Frontal - L Frontal
MyConnectome	165	2.694 ± 0.484	54 ± 24 [44.283]	0.635 ± 0.081	0.948 [0.91, 0.98]	R Frontal - R Parietal
MyConnectome	166	1.795 ± 0.423	67 ± 25 [37.952]	0.668 ± 0.115	0.956 [0.92, 0.98]	R Occipital - R Occipital
MyConnectome	167	1.867 ± 0.369	61 ± 22 [35.639]	0.712 ± 0.082	0.977 [0.96, 0.99]	R Frontal - R Frontal
MyConnectome	168	2.198 ± 0.951	49 ± 20 [40.600]	0.501 ± 0.151	0.955 [0.92, 0.98]	L Parietal - L Parietal
MyConnectome	169	2.165 ± 0.335	44 ± 20 [44.654]	0.622 ± 0.107	0.976 [0.96, 0.99]	R Parietal - R Parietal
MyConnectome	170	1.583 ± 0.529	43 ± 19 [45.018]	0.616 ± 0.112	0.952 [0.91, 0.98]	R Frontal - R Parietal
MyConnectome	171	2.187 ± 0.240	162 ± 50 [30.820]	0.811 ± 0.068	0.985 [0.97, 0.99]	R Frontal - R Frontal
MyConnectome	172	2.005 ± 0.762	77 ± 39 [50.149]	0.642 ± 0.148	0.972 [0.95, 0.99]	L Frontal - L Frontal
MyConnectome	173	1.866 ± 0.614	45 ± 17 [37.602]	0.604 ± 0.102	0.970 [0.94, 0.99]	R Parietal - R Parietal
MyConnectome	174	2.573 ± 1.284	64 ± 21 [32.139]	0.580 ± 0.125	0.965 [0.94, 0.98]	R Frontal - R Frontal
MyConnectome	175	2.717 ± 2.106	109 ± 46 [41.965]	0.573 ± 0.178	0.962 [0.93, 0.98]	L Frontal - L Frontal
MyConnectome	176	2.761 ± 0.530	70 ± 30 [43.220]	0.674 ± 0.101	0.980 [0.96, 0.99]	R Parietal - R Parietal
MyConnectome	177	2.119 ± 0.666	134 ± 53 [39.473]	0.744 ± 0.083	0.975 [0.95, 0.99]	L Frontal - L Frontal
MyConnectome	178	3.107 ± 0.192	73 ± 17 [22.662]	0.760 ± 0.035	0.985 [0.97, 0.99]	R Parietal - R Parietal
MyConnectome	179	2.310 ± 0.421	86 ± 18 [20.668]	0.541 ± 0.051	0.933 [0.88, 0.97]	R Frontal - R Frontal
MyConnectome	180	2.006 ± 1.081	74 ± 30 [41.214]	0.638 ± 0.140	0.973 [0.95, 0.99]	L Parietal - L Parietal
MyConnectome	181	3.242 ± 1.541	114 ± 38 [33.212]	0.564 ± 0.077	0.961 [0.92, 0.98]	L Temporal - L Temporal
MyConnectome	182	1.939 ± 0.522	33 ± 11 [31.802]	0.499 ± 0.068	0.933 [0.88, 0.97]	R Frontal - R Frontal
MyConnectome	183	2.532 ± 0.748	151 ± 46 [30.687]	0.739 ± 0.069	0.989 [0.98, 0.99]	R Parietal - R Parietal
MyConnectome	184	2.250 ± 0.966	89 ± 40 [44.676]	0.600 ± 0.101	0.976 [0.96, 0.99]	R Frontal - R Frontal
MyConnectome	185	1.592 ± 0.366	39 ± 17 [43.755]	0.524 ± 0.093	0.966 [0.94, 0.98]	L Frontal - L Frontal
MyConnectome	186	2.179 ± 0.715	24 ± 7 [27.166]	0.393 ± 0.066	0.957 [0.92, 0.98]	R Parietal - R Parietal
MyConnectome	187	3.164 ± 1.053	64 ± 27 [42.118]	0.486 ± 0.090	0.894 [0.81, 0.95]	L Frontal - L Parietal
MyConnectome	188	2.301 ± 0.609	100 ± 37 [36.620]	0.748 ± 0.086	0.982 [0.97, 0.99]	R Parietal - R Parietal
MyConnectome	189	2.851 ± 0.335	51 ± 16 [31.257]	0.526 ± 0.083	0.966 [0.93, 0.98]	R Frontal - R Frontal
MyConnectome	190	2.185 ± 1.148	235 ± 85 [35.953]	0.763 ± 0.144	0.986 [0.98, 0.99]	L Occipital - L Occipital
MyConnectome	191	3.002 ± 0.747	67 ± 32 [48.510]	0.565 ± 0.143	0.965 [0.94, 0.98]	R Frontal - R Parietal
MyConnectome	192	2.752 ± 0.649	21 ± 8 [36.470]	0.292 ± 0.065	0.929 [0.88, 0.97]	R Frontal - R Frontal
MyConnectome	193	1.856 ± 0.425	80 ± 24 [30.444]	0.682 ± 0.086	0.945 [0.90, 0.97]	R Frontal - R Frontal
MyConnectome	194	1.944 ± 0.571	99 ± 26 [26.438]	0.746 ± 0.062	0.989 [0.98, 0.99]	R Frontal - R Frontal
MyConnectome	195	1.822 ± 0.382	49 ± 12 [24.985]	0.616 ± 0.067	0.972 [0.95, 0.99]	R Frontal - R Frontal
MyConnectome	196	2.690 ± 0.410	98 ± 44 [45.130]	0.642 ± 0.137	0.968 [0.94, 0.99]	R Parietal - R Parietal
MyConnectome	197	1.861 ± 0.504	20 ± 8 [38.947]	0.439 ± 0.079	0.923 [0.87, 0.96]	R Frontal - R Frontal
MyConnectome	198	2.260 ± 0.498	102 ± 43 [42.571]	0.767 ± 0.122	0.978 [0.96, 0.99]	L Frontal - L Frontal
MyConnectome	199	1.603 ± 0.385	93 ± 30 [32.133]	0.742 ± 0.060	0.981 [0.96, 0.99]	L Frontal - L Frontal
MyConnectome	200	3.669 ± 0.368	33 ± 10 [29.639]	0.493 ± 0.067	0.970 [0.95, 0.99]	L Parietal - L Parietal
MyConnectome	201	3.672 ± 0.733	48 ± 20 [40.944]	0.559 ± 0.115	0.941 [0.90, 0.97]	R Frontal - R Frontal
MyConnectome	202	2.248 ± 0.675	77 ± 34 [44.712]	0.704 ± 0.128	0.971 [0.95, 0.99]	R Frontal - R Parietal
MyConnectome	203	3.137 ± 0.608	93 ± 29 [31.761]	0.723 ± 0.088	0.973 [0.95, 0.99]	R Frontal - R Parietal
MyConnectome	204	1.390 ± 0.250	72 ± 19 [27.065]	0.744 ± 0.064	0.983 [0.97, 0.99]	R Frontal - R Frontal
MyConnectome	205	2.306 ± 0.633	39 ± 23 [59.164]	0.420 ± 0.132	0.916 [0.84, 0.96]	R Parietal - R Parietal
MyConnectome	206	2.265 ± 0.389	35 ± 12 [35.073]	0.540 ± 0.094	0.962 [0.93, 0.98]	L Frontal - L Parietal
MyConnectome	207	3.235 ± 0.894	26 ± 9 [32.457]	0.369 ± 0.088	0.948 [0.91, 0.98]	R Parietal - R Parietal
MyConnectome	208	3.862 ± 0.697	57 ± 22 [38.652]	0.477 ± 0.072	0.938 [0.89, 0.97]	L Parietal - L Temporal
MyConnectome	209	2.054 ± 0.552	153 ± 34 [22.012]	0.749 ± 0.049	0.982 [0.97, 0.99]	L Parietal - L Parietal
MyConnectome	210	1.852 ± 0.720	92 ± 37 [40.528]	0.606 ± 0.109	0.965 [0.93, 0.98]	L Parietal - L Parietal
MyConnectome	211	3.177 ± 0.640	45 ± 17 [38.883]	0.597 ± 0.090	0.960 [0.93, 0.98]	R Parietal - R Parietal
MyConnectome	212	3.419 ± 0.763	36 ± 15 [40.110]	0.537 ± 0.093	0.963 [0.93, 0.98]	R Parietal - R Parietal
MyConnectome	213	3.129 ± 0.680	80 ± 27 [33.794]	0.673 ± 0.091	0.971 [0.95, 0.99]	R Frontal - R Frontal
MyConnectome	214	1.518 ± 0.401	22 ± 8 [37.927]	0.461 ± 0.090	0.950 [0.91, 0.98]	L Parietal - L Parietal
MyConnectome	215	3.293 ± 0.194	69 ± 23 [33.069]	0.729 ± 0.073	0.981 [0.97, 0.99]	L Frontal - L Frontal
MyConnectome	216	2.708 ± 0.407	105 ± 61 [58.094]	0.753 ± 0.106	0.961 [0.92, 0.98]	L Frontal - L Frontal
MyConnectome	217	2.242 ± 0.505	102 ± 44 [43.257]	0.742 ± 0.091	0.973 [0.95, 0.99]	R Frontal - R Parietal
MyConnectome	218	2.712 ± 0.329	78 ± 11 [14.651]	0.690 ± 0.031	0.983 [0.97, 0.99]	R Frontal - R Frontal
MyConnectome	219	3.343 ± 0.580	33 ± 14 [40.657]	0.545 ± 0.093	0.959 [0.92, 0.98]	R Parietal - R Parietal
MyConnectome	220	2.758 ± 0.789	18 ± 6 [32.068]	0.297 ± 0.077	0.928 [0.88, 0.97]	L Parietal - L Parietal
MyConnectome	221	2.874 ± 0.383	79 ± 34 [42.864]	0.732 ± 0.086	0.951 [0.91, 0.98]	L Parietal - L Parietal
MyConnectome	222	2.529 ± 0.589	380 ± 118 [31.165]	0.785 ± 0.071	0.964 [0.94, 0.98]	Cerebellum
MyConnectome	223	2.174 ± 0.281	45 ± 17 [37.854]	0.651 ± 0.074	0.949 [0.91, 0.98]	L Frontal - L Parietal
MyConnectome	224	1.657 ± 0.453	30 ± 14 [45.465]	0.557 ± 0.109	0.929 [0.88, 0.97]	L Frontal - L Parietal
MyConnectome	225	2.531 ± 0.422	28 ± 11 [37.668]	0.561 ± 0.069	0.966 [0.94, 0.98]	R Frontal - R Parietal
MyConnectome	226	2.699 ± 0.540	95 ± 35 [37.159]	0.543 ± 0.068	0.946 [0.90, 0.97]	R Parietal - R Temporal
MyConnectome	227	2.073 ± 0.794	67 ± 18 [27.446]	0.587 ± 0.054	0.973 [0.94, 0.99]	L Temporal - L Temporal
MyConnectome	228	2.571 ± 0.519	50 ± 12 [23.961]	0.612 ± 0.058	0.955 [0.92, 0.98]	R Parietal - R Temporal
MyConnectome	229	2.738 ± 1.557	212 ± 82 [38.455]	0.627 ± 0.121	0.848 [0.69, 0.93]	R Occipital - R Occipital
MyConnectome	230	2.145 ± 0.566	149 ± 43 [28.982]	0.807 ± 0.071	0.989 [0.98, 0.99]	L Frontal - L Frontal
MyConnectome	231	1.941 ± 0.735	42 ± 9 [20.970]	0.562 ± 0.071	0.968 [0.94, 0.99]	L Parietal - L Parietal
MyConnectome	232	2.588 ± 0.454	42 ± 14 [34.327]	0.529 ± 0.090	0.966 [0.94, 0.98]	R Parietal - R Parietal
MyConnectome	233	3.091 ± 1.417	105 ± 59 [55.956]	0.490 ± 0.114	0.508 [0.29, 0.72]	Cerebellum
MyConnectome	234	2.807 ± 0.825	118 ± 29 [24.803]	0.630 ± 0.049	0.962 [0.92, 0.98]	L Parietal - L Parietal
MyConnectome	235	1.730 ± 0.421	60 ± 23 [37.710]	0.684 ± 0.091	0.971 [0.95, 0.99]	R Frontal - R Frontal
MyConnectome	236	2.674 ± 0.300	132 ± 70 [52.992]	0.777 ± 0.119	0.979 [0.96, 0.99]	L Frontal - L Frontal
MyConnectome	237	2.495 ± 0.408	86 ± 17 [19.526]	0.735 ± 0.041	0.969 [0.94, 0.99]	R Parietal - R Temporal
MyConnectome	238	3.232 ± 1.259	31 ± 12 [37.788]	0.436 ± 0.093	0.950 [0.91, 0.98]	L Frontal - L Frontal
MyConnectome	239	2.041 ± 0.450	37 ± 12 [31.314]	0.610 ± 0.081	0.926 [0.87, 0.97]	R Frontal - R Frontal
MyConnectome	240	2.585 ± 0.775	47 ± 16 [34.354]	0.509 ± 0.095	0.973 [0.95, 0.99]	L Frontal - L Frontal
MyConnectome	241	2.214 ± 0.755	67 ± 34 [50.991]	0.586 ± 0.145	0.950 [0.91, 0.98]	R Parietal - R Parietal
MyConnectome	242	1.970 ± 0.440	88 ± 35 [39.395]	0.694 ± 0.126	0.958 [0.92, 0.98]	R Parietal - R Parietal
MyConnectome	243	3.384 ± 0.417	23 ± 9 [37.760]	0.551 ± 0.071	0.922 [0.86, 0.96]	L Frontal - L Parietal
MyConnectome	244	1.924 ± 0.448	29 ± 13 [45.576]	0.516 ± 0.106	0.953 [0.92, 0.98]	R Frontal - R Parietal
MyConnectome	245	2.811 ± 1.280	237 ± 106 [44.881]	0.694 ± 0.115	0.972 [0.94, 0.99]	R Temporal - R Temporal
MyConnectome	246	4.715 ± 1.957	48 ± 38 [79.511]	0.304 ± 0.155	0.467 [0.29, 0.67]	Cerebellum
MyConnectome	247	3.360 ± 0.901	26 ± 13 [48.317]	0.481 ± 0.113	0.969 [0.94, 0.99]	R Parietal - R Parietal
MyConnectome	248	1.876 ± 0.406	39 ± 15 [36.888]	0.640 ± 0.106	0.960 [0.93, 0.98]	R Frontal - R Frontal
MyConnectome	249	2.389 ± 0.398	88 ± 34 [38.869]	0.571 ± 0.064	0.901 [0.82, 0.95]	R Parietal - R Parietal
MyConnectome	250	2.516 ± 0.583	57 ± 16 [27.484]	0.698 ± 0.082	0.952 [0.91, 0.98]	L Parietal - L Parietal
MyConnectome	251	2.233 ± 0.985	86 ± 36 [41.332]	0.657 ± 0.197	0.935 [0.87, 0.97]	L Frontal - L Frontal
MyConnectome	252	1.797 ± 0.351	36 ± 13 [35.266]	0.517 ± 0.080	0.938 [0.89, 0.97]	R Occipital - R Occipital
MyConnectome	253	1.723 ± 0.748	15 ± 5 [34.754]	0.414 ± 0.090	0.905 [0.83, 0.96]	R Parietal - R Parietal
MyConnectome	254	2.824 ± 0.344	81 ± 26 [32.329]	0.783 ± 0.053	0.954 [0.92, 0.98]	R Frontal - R Frontal
MyConnectome	255	2.754 ± 0.516	95 ± 50 [52.992]	0.731 ± 0.133	0.962 [0.93, 0.98]	R Frontal - R Frontal
MyConnectome	256	2.836 ± 0.746	186 ± 71 [37.958]	0.784 ± 0.165	0.978 [0.96, 0.99]	L Frontal - L Frontal
MyConnectome	257	2.319 ± 0.361	80 ± 22 [27.505]	0.741 ± 0.057	0.979 [0.96, 0.99]	L Temporal - L Temporal
MyConnectome	258	2.330 ± 0.292	33 ± 14 [41.270]	0.559 ± 0.087	0.944 [0.90, 0.97]	R Frontal - R Parietal
MyConnectome	259	1.439 ± 0.691	85 ± 24 [28.208]	0.694 ± 0.090	0.983 [0.97, 0.99]	R Parietal - R Parietal
MyConnectome	260	2.261 ± 0.715	175 ± 53 [30.304]	0.824 ± 0.092	0.974 [0.95, 0.99]	L Frontal - L Frontal
MyConnectome	261	2.587 ± 0.276	40 ± 19 [47.765]	0.639 ± 0.130	0.953 [0.92, 0.98]	R Frontal - R Parietal
MyConnectome	262	3.306 ± 0.570	61 ± 26 [42.011]	0.678 ± 0.114	0.952 [0.92, 0.98]	R Frontal - R Frontal
MyConnectome	263	3.640 ± 1.729	167 ± 52 [31.206]	0.508 ± 0.102	0.908 [0.82, 0.96]	Cerebellum
MyConnectome	264	1.750 ± 0.248	44 ± 12 [26.958]	0.668 ± 0.067	0.972 [0.95, 0.99]	L Parietal - L Parietal
MyConnectome	265	1.929 ± 0.450	92 ± 28 [30.664]	0.745 ± 0.103	0.976 [0.95, 0.99]	R Frontal - R Frontal
MyConnectome	266	1.754 ± 0.578	102 ± 34 [33.204]	0.697 ± 0.097	0.982 [0.97, 0.99]	L Frontal - L Frontal
MyConnectome	267	3.026 ± 0.298	85 ± 29 [33.747]	0.833 ± 0.063	0.976 [0.96, 0.99]	R Frontal - R Frontal
MyConnectome	268	2.787 ± 0.263	32 ± 11 [32.598]	0.533 ± 0.057	0.971 [0.95, 0.99]	L Parietal - L Parietal
MyConnectome	269	2.078 ± 0.452	62 ± 19 [30.717]	0.704 ± 0.066	0.966 [0.94, 0.99]	R Parietal - R Parietal
MyConnectome	270	2.334 ± 0.539	59 ± 24 [39.752]	0.510 ± 0.114	0.965 [0.94, 0.98]	R Frontal - R Frontal
MyConnectome	271	2.245 ± 0.892	51 ± 20 [39.685]	0.382 ± 0.091	0.894 [0.81, 0.95]	R Frontal - R Parietal
MyConnectome	272	3.213 ± 1.419	34 ± 14 [42.472]	0.279 ± 0.081	0.743 [0.58, 0.87]	L Frontal - L Frontal
MyConnectome	273	1.836 ± 0.327	44 ± 8 [18.265]	0.643 ± 0.035	0.988 [0.98, 0.99]	R Frontal - R Frontal
MyConnectome	274	1.438 ± 0.248	55 ± 13 [22.769]	0.708 ± 0.056	0.980 [0.96, 0.99]	R Frontal - R Parietal
MyConnectome	275	2.130 ± 0.589	45 ± 17 [39.192]	0.591 ± 0.125	0.957 [0.92, 0.98]	R Parietal - R Parietal
MyConnectome	276	5.579 ± 5.105	74 ± 30 [40.813]	0.669 ± 0.147	0.957 [0.92, 0.98]	L Parietal - L Parietal
MyConnectome	277	2.653 ± 0.785	49 ± 17 [35.252]	0.563 ± 0.122	0.967 [0.94, 0.98]	L Parietal - L Parietal
MyConnectome	278	1.877 ± 0.615	74 ± 28 [37.587]	0.696 ± 0.105	0.967 [0.93, 0.99]	R Frontal - R Parietal
MyConnectome	279	2.071 ± 0.298	141 ± 28 [19.623]	0.711 ± 0.048	0.982 [0.97, 0.99]	R Frontal - R Frontal
MyConnectome	280	2.063 ± 0.823	106 ± 46 [43.390]	0.727 ± 0.108	0.983 [0.97, 0.99]	L Frontal - L Frontal
MyConnectome	281	3.399 ± 0.827	37 ± 17 [45.518]	0.415 ± 0.091	0.895 [0.82, 0.95]	L Parietal - L Parietal
MyConnectome	282	2.045 ± 0.505	42 ± 16 [37.105]	0.593 ± 0.112	0.947 [0.91, 0.97]	R Frontal - R Frontal
MyConnectome	283	1.363 ± 0.323	124 ± 17 [13.549]	0.822 ± 0.018	0.989 [0.98, 0.99]	L Frontal - L Frontal
MyConnectome	284	2.597 ± 0.547	59 ± 26 [44.156]	0.517 ± 0.126	0.939 [0.89, 0.97]	R Parietal - R Parietal
MyConnectome	285	2.642 ± 0.532	61 ± 23 [37.314]	0.690 ± 0.068	0.973 [0.95, 0.99]	R Frontal - R Frontal
MyConnectome	286	3.610 ± 0.861	33 ± 12 [36.544]	0.484 ± 0.104	0.945 [0.90, 0.97]	R Parietal - R Parietal
MyConnectome	287	1.830 ± 0.417	124 ± 26 [21.261]	0.761 ± 0.046	0.991 [0.98, 1.00]	R Frontal - R Frontal
MyConnectome	288	2.374 ± 0.714	54 ± 17 [31.969]	0.672 ± 0.089	0.973 [0.95, 0.99]	L Frontal - L Frontal
MyConnectome	289	2.562 ± 0.487	63 ± 25 [38.804]	0.659 ± 0.097	0.964 [0.94, 0.98]	R Parietal - R Parietal
MyConnectome	290	2.582 ± 1.140	128 ± 53 [41.202]	0.665 ± 0.150	0.977 [0.96, 0.99]	R Parietal - R Parietal
MyConnectome	291	2.775 ± 0.412	60 ± 21 [34.359]	0.643 ± 0.069	0.972 [0.95, 0.99]	L Temporal - L Temporal
MyConnectome	292	2.215 ± 0.845	30 ± 9 [29.944]	0.439 ± 0.071	0.947 [0.91, 0.98]	R Temporal - R Temporal
MyConnectome	293	2.835 ± 0.413	47 ± 11 [24.497]	0.522 ± 0.083	0.810 [0.68, 0.91]	R Temporal - R Temporal
MyConnectome	294	2.252 ± 0.454	51 ± 24 [46.665]	0.672 ± 0.119	0.955 [0.92, 0.98]	R Frontal - R Parietal
MyConnectome	295	3.287 ± 1.228	112 ± 60 [53.715]	0.623 ± 0.131	0.947 [0.91, 0.98]	R Frontal - R Cingulate
MyConnectome	296	2.468 ± 0.764	37 ± 14 [36.878]	0.456 ± 0.083	0.905 [0.83, 0.95]	L Temporal - L Temporal
MyConnectome	297	3.186 ± 0.601	22 ± 7 [32.202]	0.468 ± 0.062	0.901 [0.83, 0.95]	R Parietal - R Parietal
MyConnectome	298	2.258 ± 0.550	71 ± 24 [33.690]	0.655 ± 0.093	0.975 [0.95, 0.99]	L Parietal - L Parietal
MyConnectome	299	2.162 ± 0.817	252 ± 71 [28.115]	0.802 ± 0.115	0.970 [0.94, 0.99]	R Parietal - R Parietal
MyConnectome	300	2.809 ± 0.513	95 ± 31 [33.212]	0.728 ± 0.085	0.913 [0.85, 0.96]	L Frontal - L Frontal
MyConnectome	301	2.936 ± 0.388	21 ± 8 [37.558]	0.438 ± 0.090	0.959 [0.93, 0.98]	R Parietal - R Parietal
MyConnectome	302	3.122 ± 0.418	19 ± 6 [34.901]	0.444 ± 0.084	0.902 [0.83, 0.95]	R Frontal - R Frontal
MyConnectome	303	1.471 ± 0.388	104 ± 27 [26.019]	0.803 ± 0.070	0.982 [0.97, 0.99]	R Frontal - R Frontal
MyConnectome	304	3.565 ± 1.026	102 ± 53 [52.447]	0.705 ± 0.149	0.955 [0.92, 0.98]	R Parietal - R Parietal
MyConnectome	305	3.270 ± 1.294	58 ± 21 [36.210]	0.440 ± 0.073	0.770 [0.60, 0.89]	Cerebellum
MyConnectome	306	2.537 ± 0.476	64 ± 34 [53.692]	0.692 ± 0.161	0.962 [0.93, 0.98]	L Parietal - L Parietal
MyConnectome	307	2.657 ± 0.394	24 ± 7 [29.142]	0.369 ± 0.064	0.959 [0.93, 0.98]	R Frontal - R Parietal
MyConnectome	308	2.323 ± 0.507	57 ± 17 [30.651]	0.572 ± 0.100	0.963 [0.93, 0.98]	R Frontal - R Frontal
MyConnectome	309	2.113 ± 0.415	51 ± 9 [16.878]	0.694 ± 0.047	0.987 [0.98, 0.99]	R Frontal - R Frontal
MyConnectome	310	2.364 ± 0.681	79 ± 38 [48.374]	0.679 ± 0.121	0.984 [0.97, 0.99]	L Frontal - L Frontal
MyConnectome	311	2.681 ± 0.595	61 ± 27 [43.706]	0.692 ± 0.136	0.972 [0.95, 0.99]	R Frontal - R Frontal
MyConnectome	312	2.607 ± 0.439	44 ± 10 [23.902]	0.578 ± 0.051	0.971 [0.95, 0.99]	R Frontal - R Frontal
MyConnectome	313	2.024 ± 0.534	51 ± 23 [44.719]	0.512 ± 0.106	0.913 [0.84, 0.96]	R Frontal - R Frontal
MyConnectome	314	4.413 ± 1.830	45 ± 23 [51.616]	0.341 ± 0.095	0.892 [0.82, 0.95]	L Temporal - L Temporal
MyConnectome	315	2.525 ± 0.549	70 ± 25 [36.185]	0.706 ± 0.078	0.959 [0.92, 0.98]	L Frontal - L Parietal
MyConnectome	316	2.048 ± 0.723	71 ± 32 [44.544]	0.733 ± 0.115	0.981 [0.97, 0.99]	R Parietal - R Parietal
MyConnectome	317	3.094 ± 0.784	197 ± 97 [49.123]	0.681 ± 0.105	0.976 [0.95, 0.99]	R Parietal - R Cingulate
MyConnectome	318	2.702 ± 0.726	48 ± 14 [29.812]	0.609 ± 0.119	0.958 [0.93, 0.98]	L Parietal - L Parietal
MyConnectome	319	3.438 ± 0.755	17 ± 8 [45.685]	0.385 ± 0.094	0.894 [0.82, 0.95]	R Frontal - R Frontal
MyConnectome	320	2.007 ± 0.259	70 ± 33 [47.706]	0.666 ± 0.091	0.959 [0.93, 0.98]	R Parietal - R Parietal
MyConnectome	321	1.544 ± 0.304	52 ± 11 [20.859]	0.712 ± 0.047	0.982 [0.96, 0.99]	R Frontal - R Frontal
MyConnectome	322	1.573 ± 0.544	28 ± 10 [37.574]	0.497 ± 0.084	0.930 [0.87, 0.97]	L Frontal - L Frontal
MyConnectome	323	3.254 ± 0.808	26 ± 13 [51.617]	0.439 ± 0.111	0.940 [0.89, 0.97]	L Frontal - L Frontal
MyConnectome	324	3.079 ± 1.663	125 ± 46 [36.843]	0.559 ± 0.120	0.818 [0.66, 0.92]	L Occipital - L Occipital
MyConnectome	325	2.808 ± 0.754	71 ± 24 [33.554]	0.678 ± 0.149	0.966 [0.94, 0.98]	R Frontal - R Frontal
MyConnectome	326	2.603 ± 0.642	18 ± 6 [31.776]	0.361 ± 0.069	0.883 [0.80, 0.94]	R Parietal - R Parietal
MyConnectome	327	2.449 ± 0.324	54 ± 17 [32.268]	0.669 ± 0.072	0.958 [0.92, 0.98]	L Parietal - L Parietal
MyConnectome	328	1.932 ± 0.653	34 ± 11 [32.221]	0.491 ± 0.086	0.934 [0.88, 0.97]	R Frontal - R Frontal
MyConnectome	329	1.860 ± 0.400	48 ± 18 [36.842]	0.642 ± 0.090	0.980 [0.96, 0.99]	R Frontal - R Frontal
MyConnectome	330	4.213 ± 1.123	7 ± 3 [43.002]	0.122 ± 0.042	0.850 [0.76, 0.93]	R Parietal - R Parietal
MyConnectome	331	2.117 ± 0.527	51 ± 21 [41.383]	0.564 ± 0.070	0.978 [0.96, 0.99]	R Frontal - R Frontal
MyConnectome	332	2.294 ± 0.722	13 ± 5 [43.374]	0.213 ± 0.060	0.924 [0.87, 0.96]	L Frontal - L Frontal
MyConnectome	333	2.230 ± 0.699	33 ± 13 [39.857]	0.581 ± 0.093	0.943 [0.90, 0.97]	R Frontal - R Frontal
MyConnectome	334	2.995 ± 0.324	18 ± 7 [38.826]	0.503 ± 0.081	0.930 [0.88, 0.97]	R Parietal - R Parietal
MyConnectome	335	1.705 ± 0.633	142 ± 39 [27.337]	0.748 ± 0.080	0.982 [0.97, 0.99]	R Occipital - R Occipital
MyConnectome	336	2.411 ± 0.447	70 ± 31 [44.941]	0.726 ± 0.106	0.977 [0.96, 0.99]	L Frontal - L Frontal
MyConnectome	337	2.429 ± 0.546	61 ± 31 [49.960]	0.717 ± 0.100	0.952 [0.92, 0.98]	L Frontal - L Frontal
MyConnectome	338	1.995 ± 0.325	93 ± 27 [29.383]	0.774 ± 0.075	0.970 [0.95, 0.99]	L Frontal - L Frontal
MyConnectome	339	1.754 ± 0.305	33 ± 9 [25.764]	0.514 ± 0.053	0.971 [0.95, 0.99]	R Frontal - R Frontal
MyConnectome	340	2.664 ± 0.396	133 ± 44 [32.928]	0.779 ± 0.106	0.978 [0.96, 0.99]	R Frontal - R Frontal
MyConnectome	341	1.809 ± 0.604	191 ± 45 [23.812]	0.834 ± 0.058	0.987 [0.98, 0.99]	L Occipital - L Occipital
MyConnectome	342	2.236 ± 0.668	176 ± 68 [38.856]	0.790 ± 0.143	0.986 [0.97, 0.99]	L Occipital - L Occipital
MyConnectome	343	8.385 ± 2.346	3 ± 1 [49.182]	0.054 ± 0.039	0.686 [0.54, 0.83]	R Parietal - R Parietal
MyConnectome	344	2.137 ± 0.171	30 ± 12 [39.550]	0.594 ± 0.084	0.948 [0.91, 0.98]	R Frontal - R Parietal
MyConnectome	345	2.463 ± 0.403	130 ± 38 [29.041]	0.730 ± 0.041	0.975 [0.95, 0.99]	R Frontal - R Frontal
MyConnectome	346	2.025 ± 0.471	74 ± 33 [45.105]	0.679 ± 0.112	0.961 [0.93, 0.98]	L Frontal - L Parietal
MyConnectome	347	2.271 ± 0.398	55 ± 16 [29.372]	0.652 ± 0.101	0.975 [0.95, 0.99]	L Parietal - L Parietal
MyConnectome	348	3.094 ± 1.072	39 ± 15 [38.680]	0.485 ± 0.124	0.958 [0.92, 0.98]	R Frontal - R Parietal
MyConnectome	349	2.334 ± 0.507	59 ± 20 [34.133]	0.605 ± 0.079	0.981 [0.97, 0.99]	L Frontal - L Frontal
MyConnectome	350	2.412 ± 0.818	25 ± 12 [47.344]	0.422 ± 0.129	0.958 [0.92, 0.98]	L Frontal - L Frontal
MyConnectome	351	3.097 ± 0.375	13 ± 5 [36.067]	0.432 ± 0.081	0.932 [0.88, 0.97]	L Frontal - L Frontal
MyConnectome	352	1.956 ± 0.797	98 ± 32 [32.145]	0.720 ± 0.084	0.980 [0.96, 0.99]	R Frontal - R Frontal
MyConnectome	353	1.857 ± 0.744	24 ± 9 [36.643]	0.487 ± 0.110	0.940 [0.89, 0.97]	R Frontal - R Frontal
MyConnectome	354	2.586 ± 1.610	14 ± 7 [48.571]	0.279 ± 0.105	0.904 [0.84, 0.95]	L Parietal - L Parietal
MyConnectome	355	2.261 ± 0.632	35 ± 15 [42.017]	0.491 ± 0.135	0.957 [0.92, 0.98]	R Parietal - R Parietal
MyConnectome	356	1.824 ± 0.591	65 ± 10 [15.708]	0.574 ± 0.036	0.985 [0.97, 0.99]	R Frontal - R Frontal
MyConnectome	357	2.392 ± 1.367	141 ± 41 [29.335]	0.640 ± 0.108	0.963 [0.93, 0.98]	L Frontal - L Frontal
MyConnectome	358	3.932 ± 2.310	56 ± 27 [48.646]	0.418 ± 0.113	0.961 [0.93, 0.98]	L Frontal - L Frontal
MyConnectome	359	3.715 ± 1.213	332 ± 178 [53.659]	0.577 ± 0.122	0.884 [0.77, 0.95]	R Temporal - R Cingulate
MyConnectome	360	2.867 ± 1.098	30 ± 13 [43.881]	0.429 ± 0.144	0.931 [0.88, 0.97]	R Frontal - R Frontal
MyConnectome	361	1.860 ± 1.117	51 ± 15 [29.566]	0.566 ± 0.117	0.942 [0.89, 0.97]	R Frontal - R Frontal
MyConnectome	362	1.903 ± 0.459	39 ± 12 [30.741]	0.522 ± 0.066	0.964 [0.93, 0.98]	L Temporal - L Temporal
MyConnectome	363	1.606 ± 0.581	130 ± 19 [14.499]	0.706 ± 0.039	0.989 [0.98, 1.00]	L Parietal - L Parietal
MyConnectome	364	2.257 ± 0.604	25 ± 9 [35.398]	0.383 ± 0.065	0.939 [0.89, 0.97]	R Parietal - R Parietal
MyConnectome	365	3.256 ± 0.565	42 ± 16 [37.210]	0.610 ± 0.086	0.948 [0.91, 0.98]	R Frontal - R Frontal
MyConnectome	366	5.948 ± 2.282	98 ± 52 [52.989]	0.256 ± 0.111	0.765 [0.63, 0.88]	Cerebellum
MyConnectome	367	1.870 ± 0.458	73 ± 22 [30.018]	0.731 ± 0.105	0.969 [0.94, 0.99]	R Parietal - R Parietal
MyConnectome	368	2.952 ± 0.339	25 ± 11 [44.303]	0.524 ± 0.132	0.930 [0.88, 0.97]	L Frontal - L Parietal
MyConnectome	369	2.672 ± 0.906	35 ± 14 [40.823]	0.543 ± 0.128	0.912 [0.85, 0.96]	R Frontal - R Frontal
MyConnectome	370	3.400 ± 1.951	563 ± 135 [23.912]	0.764 ± 0.076	0.943 [0.88, 0.98]	Cerebellum
MyConnectome	371	4.017 ± 2.973	141 ± 73 [51.575]	0.590 ± 0.178	0.956 [0.92, 0.98]	L Frontal - L Frontal
MyConnectome	372	2.378 ± 0.404	42 ± 12 [29.682]	0.565 ± 0.057	0.973 [0.95, 0.99]	L Parietal - L Parietal
MyConnectome	373	2.672 ± 0.471	60 ± 22 [37.077]	0.690 ± 0.118	0.974 [0.95, 0.99]	L Occipital - L Occipital
MyConnectome	374	1.757 ± 0.178	69 ± 9 [12.671]	0.671 ± 0.032	0.980 [0.96, 0.99]	L Frontal - L Frontal
MyConnectome	375	4.295 ± 2.068	104 ± 59 [56.630]	0.467 ± 0.125	0.880 [0.78, 0.94]	L Frontal - L Temporal
MyConnectome	376	1.978 ± 0.755	24 ± 8 [33.996]	0.355 ± 0.070	0.924 [0.87, 0.96]	L Parietal - L Parietal
MyConnectome	377	3.382 ± 1.861	50 ± 17 [33.326]	0.294 ± 0.081	0.609 [0.43, 0.78]	R Frontal - R Frontal
MyConnectome	378	1.844 ± 0.328	63 ± 20 [31.171]	0.672 ± 0.069	0.975 [0.95, 0.99]	L Parietal - L Temporal
MyConnectome	379	2.017 ± 0.338	37 ± 14 [38.354]	0.506 ± 0.085	0.937 [0.89, 0.97]	R Temporal - R Temporal
MyConnectome	380	2.778 ± 0.975	26 ± 10 [40.801]	0.414 ± 0.134	0.892 [0.81, 0.95]	L Frontal - L Frontal
MyConnectome	381	2.877 ± 0.724	19 ± 10 [51.070]	0.405 ± 0.118	0.875 [0.79, 0.94]	L Frontal - L Parietal
MyConnectome	382	1.957 ± 0.593	25 ± 12 [46.482]	0.552 ± 0.113	0.905 [0.83, 0.96]	L Frontal - L Frontal
MyConnectome	383	4.232 ± 0.960	8 ± 3 [37.715]	0.145 ± 0.034	0.865 [0.78, 0.93]	R Frontal - R Frontal
MyConnectome	384	2.046 ± 0.558	27 ± 13 [48.778]	0.560 ± 0.128	0.920 [0.86, 0.96]	R Parietal - R Parietal
MyConnectome	385	1.924 ± 0.360	95 ± 45 [46.969]	0.757 ± 0.157	0.963 [0.93, 0.98]	R Frontal - R Frontal
MyConnectome	386	2.585 ± 1.343	185 ± 71 [38.297]	0.784 ± 0.148	0.988 [0.98, 0.99]	R Frontal - R Frontal
MyConnectome	387	2.842 ± 0.613	35 ± 7 [21.289]	0.478 ± 0.057	0.942 [0.89, 0.97]	L Parietal - L Parietal
MyConnectome	388	2.916 ± 1.312	79 ± 27 [33.754]	0.523 ± 0.114	0.852 [0.73, 0.93]	L Frontal - L Frontal
MyConnectome	389	2.687 ± 0.866	9 ± 4 [45.308]	0.294 ± 0.086	0.864 [0.78, 0.93]	L Parietal - L Parietal
MyConnectome	390	3.165 ± 0.902	24 ± 9 [36.516]	0.386 ± 0.102	0.883 [0.80, 0.94]	L Frontal - L Parietal
MyConnectome	391	1.657 ± 0.280	137 ± 53 [38.644]	0.790 ± 0.076	0.974 [0.95, 0.99]	R Frontal - R Frontal
MyConnectome	392	1.533 ± 0.274	39 ± 15 [39.464]	0.607 ± 0.086	0.946 [0.89, 0.98]	L Frontal - L Frontal
MyConnectome	393	2.616 ± 0.691	49 ± 16 [32.754]	0.682 ± 0.091	0.952 [0.91, 0.98]	R Frontal - R Frontal
MyConnectome	394	2.586 ± 0.520	38 ± 11 [28.836]	0.478 ± 0.080	0.959 [0.93, 0.98]	R Frontal - R Frontal
MyConnectome	395	3.239 ± 0.876	40 ± 13 [31.952]	0.426 ± 0.082	0.887 [0.79, 0.95]	R Occipital - R Occipital
MyConnectome	396	1.997 ± 0.328	63 ± 23 [36.351]	0.673 ± 0.106	0.963 [0.93, 0.98]	L Parietal - L Parietal
MyConnectome	397	2.373 ± 1.442	224 ± 60 [26.902]	0.808 ± 0.097	0.990 [0.98, 1.00]	L Occipital - L Occipital
MyConnectome	398	2.261 ± 0.720	42 ± 21 [49.848]	0.543 ± 0.135	0.978 [0.96, 0.99]	L Frontal - L Frontal
MyConnectome	399	2.077 ± 1.185	51 ± 12 [22.830]	0.468 ± 0.059	0.952 [0.91, 0.98]	L Frontal - L Frontal
MyConnectome	400	4.139 ± 0.646	38 ± 15 [39.373]	0.646 ± 0.118	0.963 [0.93, 0.98]	L Parietal - L Parietal
MyConnectome	401	2.086 ± 0.551	35 ± 16 [44.737]	0.555 ± 0.111	0.941 [0.90, 0.97]	L Frontal - L Frontal
MyConnectome	402	2.495 ± 1.190	32 ± 10 [33.061]	0.377 ± 0.103	0.951 [0.91, 0.98]	L Frontal - L Frontal
MyConnectome	403	3.699 ± 1.799	8 ± 4 [51.457]	0.211 ± 0.100	0.716 [0.58, 0.85]	R Frontal - R Frontal
MyConnectome	404	2.667 ± 0.781	28 ± 14 [49.047]	0.422 ± 0.111	0.908 [0.84, 0.96]	L Parietal - L Parietal
MyConnectome	405	2.588 ± 0.914	98 ± 49 [50.045]	0.612 ± 0.180	0.961 [0.93, 0.98]	R Frontal - R Frontal
MyConnectome	406	1.938 ± 0.874	58 ± 33 [56.733]	0.608 ± 0.193	0.899 [0.83, 0.95]	L Frontal - L Frontal
MyConnectome	407	2.120 ± 1.094	28 ± 13 [44.939]	0.437 ± 0.169	0.906 [0.84, 0.95]	R Frontal - R Frontal
MyConnectome	408	1.975 ± 0.549	68 ± 20 [30.068]	0.709 ± 0.069	0.976 [0.96, 0.99]	L Frontal - L Frontal
MyConnectome	409	2.026 ± 0.746	27 ± 11 [40.805]	0.422 ± 0.123	0.940 [0.90, 0.97]	R Occipital - R Occipital
MyConnectome	410	2.993 ± 1.882	107 ± 48 [44.472]	0.649 ± 0.195	0.970 [0.94, 0.99]	L Frontal - L Frontal
MyConnectome	411	2.115 ± 0.606	39 ± 16 [41.913]	0.508 ± 0.108	0.958 [0.93, 0.98]	L Frontal - L Frontal
MyConnectome	412	3.075 ± 0.973	51 ± 17 [32.810]	0.539 ± 0.063	0.959 [0.93, 0.98]	L Frontal - L Temporal
MyConnectome	413	2.223 ± 0.743	88 ± 29 [32.384]	0.673 ± 0.098	0.982 [0.97, 0.99]	L Occipital - L Occipital
MyConnectome	414	5.172 ± 1.949	75 ± 60 [80.782]	0.296 ± 0.113	0.659 [0.50, 0.81]	Cerebellum
MyConnectome	415	3.431 ± 0.709	12 ± 5 [39.746]	0.333 ± 0.081	0.928 [0.88, 0.97]	R Parietal - R Parietal
MyConnectome	416	1.743 ± 0.341	50 ± 13 [26.515]	0.641 ± 0.057	0.976 [0.96, 0.99]	L Parietal - L Occipital
MyConnectome	417	3.037 ± 0.385	20 ± 10 [47.197]	0.487 ± 0.116	0.947 [0.90, 0.98]	R Parietal - R Parietal
MyConnectome	418	3.149 ± 0.627	23 ± 9 [39.005]	0.414 ± 0.091	0.947 [0.91, 0.98]	R Frontal - R Frontal
MyConnectome	419	2.456 ± 0.738	38 ± 13 [34.892]	0.489 ± 0.120	0.966 [0.94, 0.98]	R Parietal - R Parietal
MyConnectome	420	2.366 ± 0.613	85 ± 47 [55.351]	0.673 ± 0.194	0.927 [0.87, 0.97]	L Parietal - L Parietal
MyConnectome	421	2.219 ± 0.681	26 ± 10 [39.233]	0.469 ± 0.111	0.866 [0.77, 0.94]	R Parietal - R Parietal
MyConnectome	422	1.409 ± 0.582	22 ± 10 [42.909]	0.544 ± 0.112	0.923 [0.86, 0.96]	L Frontal - L Frontal
MyConnectome	423	2.252 ± 0.289	227 ± 46 [20.173]	0.838 ± 0.022	0.986 [0.97, 0.99]	R Frontal - R Cingulate
MyConnectome	424	1.370 ± 0.331	23 ± 12 [51.751]	0.600 ± 0.106	0.940 [0.89, 0.97]	L Frontal - L Frontal
MyConnectome	425	2.620 ± 0.956	107 ± 43 [40.026]	0.634 ± 0.100	0.932 [0.88, 0.97]	L Temporal - L Temporal
MyConnectome	426	3.336 ± 0.191	38 ± 11 [30.447]	0.682 ± 0.058	0.970 [0.95, 0.99]	R Frontal - R Parietal
MyConnectome	427	4.348 ± 0.675	21 ± 9 [42.682]	0.339 ± 0.078	0.870 [0.78, 0.94]	R Parietal - R Temporal
MyConnectome	428	1.725 ± 0.607	20 ± 6 [27.963]	0.441 ± 0.081	0.932 [0.88, 0.97]	L Parietal - L Parietal
MyConnectome	429	2.217 ± 0.938	36 ± 17 [46.320]	0.485 ± 0.146	0.909 [0.83, 0.96]	L Frontal - L Frontal
MyConnectome	430	2.003 ± 0.787	88 ± 34 [38.780]	0.734 ± 0.176	0.974 [0.95, 0.99]	R Frontal - R Frontal
MyConnectome	431	3.171 ± 1.209	25 ± 13 [50.118]	0.309 ± 0.099	0.721 [0.57, 0.85]	L Frontal - L Frontal
MyConnectome	432	1.006 ± 0.609	90 ± 33 [37.242]	0.720 ± 0.169	0.970 [0.95, 0.99]	R Frontal - R Frontal
MyConnectome	433	2.287 ± 0.637	13 ± 6 [48.555]	0.408 ± 0.098	0.929 [0.88, 0.97]	R Parietal - R Parietal
MyConnectome	434	2.169 ± 0.870	56 ± 25 [43.996]	0.583 ± 0.147	0.962 [0.93, 0.98]	R Parietal - R Parietal
MyConnectome	435	2.277 ± 0.576	58 ± 19 [32.527]	0.678 ± 0.120	0.970 [0.95, 0.99]	L Parietal - L Parietal
MyConnectome	436	2.118 ± 0.652	44 ± 16 [37.294]	0.601 ± 0.112	0.754 [0.63, 0.87]	R Frontal - R Frontal
MyConnectome	437	2.687 ± 0.642	42 ± 20 [48.481]	0.596 ± 0.132	0.951 [0.91, 0.98]	L Frontal - L Parietal
MyConnectome	438	1.651 ± 0.742	71 ± 26 [36.533]	0.642 ± 0.143	0.979 [0.96, 0.99]	R Parietal - R Parietal
MyConnectome	439	2.144 ± 0.478	28 ± 9 [33.086]	0.503 ± 0.106	0.942 [0.90, 0.97]	R Frontal - R Frontal
MyConnectome	440	1.909 ± 0.624	60 ± 27 [45.088]	0.685 ± 0.153	0.959 [0.93, 0.98]	R Parietal - R Parietal
MyConnectome	441	2.403 ± 1.666	52 ± 20 [39.618]	0.557 ± 0.226	0.893 [0.82, 0.95]	R Occipital - R Occipital
MyConnectome	442	1.743 ± 0.332	34 ± 15 [42.664]	0.645 ± 0.131	0.945 [0.90, 0.97]	L Frontal - L Frontal
MyConnectome	443	2.299 ± 0.507	21 ± 7 [31.831]	0.480 ± 0.086	0.907 [0.84, 0.96]	L Parietal - L Parietal
MyConnectome	444	2.297 ± 0.774	88 ± 22 [25.255]	0.657 ± 0.105	0.930 [0.86, 0.97]	L Temporal - L Occipital
MyConnectome	445	2.661 ± 0.415	27 ± 13 [46.656]	0.532 ± 0.097	0.829 [0.72, 0.91]	R Frontal - R Frontal
MyConnectome	446	1.883 ± 0.866	15 ± 5 [36.957]	0.366 ± 0.086	0.898 [0.83, 0.95]	R Frontal - R Frontal
MyConnectome	447	1.943 ± 0.810	40 ± 15 [38.519]	0.613 ± 0.113	0.949 [0.91, 0.98]	R Frontal - R Frontal
MyConnectome	448	1.788 ± 0.629	101 ± 33 [32.403]	0.772 ± 0.090	0.984 [0.97, 0.99]	R Frontal - R Frontal
MyConnectome	449	1.955 ± 0.989	27 ± 10 [36.691]	0.431 ± 0.075	0.931 [0.88, 0.97]	L Frontal - L Parietal
MyConnectome	450	2.516 ± 1.580	92 ± 37 [40.219]	0.541 ± 0.091	0.869 [0.77, 0.94]	L Frontal - L Temporal
MyConnectome	451	-	-	-	-	R Parietal - R Parietal
MyConnectome	452	2.353 ± 1.570	29 ± 11 [38.443]	0.485 ± 0.169	0.877 [0.80, 0.94]	L Frontal - L Frontal
MyConnectome	453	-	-	-	-	Cerebellum
MyConnectome	454	3.739 ± 1.330	29 ± 19 [66.154]	0.314 ± 0.130	0.797 [0.66, 0.90]	L Frontal - L Cingulate
MyConnectome	455	4.471 ± 2.477	27 ± 13 [47.985]	0.423 ± 0.195	0.863 [0.78, 0.93]	R Frontal - R Frontal
MyConnectome	456	2.866 ± 0.999	109 ± 54 [49.686]	0.680 ± 0.137	0.974 [0.95, 0.99]	L Frontal - L Cingulate
MyConnectome	457	1.856 ± 0.970	40 ± 15 [36.419]	0.509 ± 0.158	0.946 [0.90, 0.98]	R Parietal - R Parietal
MyConnectome	458	1.989 ± 0.661	37 ± 14 [36.869]	0.595 ± 0.143	0.965 [0.94, 0.98]	L Occipital - L Occipital
MyConnectome	459	2.699 ± 1.159	15 ± 8 [55.447]	0.371 ± 0.125	0.873 [0.78, 0.94]	R Parietal - R Parietal
MyConnectome	460	2.545 ± 0.302	20 ± 8 [39.523]	0.570 ± 0.111	0.908 [0.84, 0.96]	L Frontal - L Frontal
MyConnectome	461	-	-	-	-	Cerebellum
MyConnectome	462	2.764 ± 1.058	18 ± 7 [37.214]	0.410 ± 0.086	0.952 [0.91, 0.98]	L Frontal - L Frontal
MyConnectome	463	2.763 ± 1.103	24 ± 14 [56.547]	0.287 ± 0.105	0.953 [0.91, 0.98]	L Frontal - L Frontal
MyConnectome	464	2.674 ± 1.164	45 ± 27 [59.854]	0.536 ± 0.195	0.916 [0.85, 0.96]	L Frontal - L Frontal
MyConnectome	465	2.239 ± 1.340	33 ± 13 [40.074]	0.563 ± 0.157	0.944 [0.90, 0.97]	L Frontal - L Frontal
MyConnectome	466	3.242 ± 0.920	45 ± 16 [35.466]	0.268 ± 0.069	0.773 [0.65, 0.88]	R Frontal - R Frontal
MyConnectome	467	3.375 ± 0.700	18 ± 5 [29.130]	0.428 ± 0.068	0.941 [0.90, 0.97]	L Parietal - L Parietal
MyConnectome	468	2.336 ± 0.931	210 ± 61 [28.776]	0.792 ± 0.054	0.987 [0.97, 0.99]	R Frontal - R Cingulate
MyConnectome	469	1.441 ± 0.886	52 ± 17 [32.689]	0.641 ± 0.118	0.961 [0.93, 0.98]	L Parietal - L Occipital
MyConnectome	470	1.372 ± 0.872	25 ± 13 [50.088]	0.493 ± 0.159	0.911 [0.85, 0.96]	L Frontal - L Frontal
MyConnectome	471	2.359 ± 0.586	18 ± 10 [56.108]	0.290 ± 0.096	0.497 [0.34, 0.69]	R Frontal - R Frontal
MyConnectome	472	2.226 ± 0.825	27 ± 11 [42.078]	0.555 ± 0.135	0.953 [0.91, 0.98]	L Frontal - L Frontal
MyConnectome	473	4.047 ± 0.581	25 ± 12 [45.769]	0.440 ± 0.114	0.915 [0.85, 0.96]	L Frontal - L Frontal
MyConnectome	474	2.629 ± 1.137	29 ± 13 [44.946]	0.334 ± 0.112	0.849 [0.75, 0.93]	R Parietal - R Parietal
MyConnectome	475	2.511 ± 0.599	12 ± 5 [39.892]	0.216 ± 0.069	0.902 [0.84, 0.95]	R Parietal - R Parietal
MyConnectome	476	1.791 ± 0.447	53 ± 12 [23.527]	0.691 ± 0.063	0.971 [0.95, 0.99]	R Occipital - R Occipital
MyConnectome	477	2.029 ± 1.627	111 ± 43 [38.662]	0.685 ± 0.161	0.961 [0.93, 0.98]	L Occipital - L Occipital
MyConnectome	478	2.263 ± 0.886	20 ± 11 [58.357]	0.457 ± 0.109	0.910 [0.83, 0.96]	L Frontal - L Frontal
MyConnectome	479	3.203 ± 1.259	5 ± 2 [49.708]	0.159 ± 0.069	0.777 [0.66, 0.88]	L Parietal - L Parietal
MyConnectome	480	2.691 ± 1.091	17 ± 8 [45.619]	0.257 ± 0.092	0.889 [0.82, 0.95]	L Frontal - L Temporal
MyConnectome	481	2.213 ± 1.059	7 ± 4 [64.646]	0.206 ± 0.103	0.657 [0.51, 0.81]	R Frontal - R Frontal
MyConnectome	482	2.080 ± 0.914	10 ± 5 [53.231]	0.297 ± 0.123	0.892 [0.82, 0.95]	L Frontal - L Frontal
MyConnectome	483	4.007 ± 1.936	4 ± 3 [68.312]	0.130 ± 0.069	0.773 [0.65, 0.88]	L Frontal - L Frontal
MyConnectome	484	1.455 ± 0.908	24 ± 8 [31.740]	0.501 ± 0.117	0.950 [0.91, 0.98]	L Parietal - L Parietal
MyConnectome	485	2.448 ± 1.013	5 ± 3 [55.024]	0.222 ± 0.102	0.820 [0.70, 0.91]	L Frontal - L Frontal
MyConnectome	486	3.653 ± 1.109	11 ± 6 [55.511]	0.238 ± 0.081	0.676 [0.50, 0.83]	R Parietal - R Parietal
MyConnectome	487	4.658 ± 2.909	571 ± 299 [52.365]	0.676 ± 0.274	0.738 [0.60, 0.86]	Cerebellum
MyConnectome	488	2.085 ± 1.203	14 ± 8 [54.627]	0.389 ± 0.115	0.898 [0.82, 0.95]	L Frontal - L Frontal
MyConnectome	489	2.798 ± 1.747	34 ± 19 [54.118]	0.449 ± 0.223	0.889 [0.81, 0.95]	L Occipital - L Occipital
MyConnectome	490	2.821 ± 0.629	62 ± 26 [41.410]	0.525 ± 0.066	0.842 [0.73, 0.92]	Cerebellum
MyConnectome	491	2.513 ± 0.623	11 ± 6 [58.816]	0.335 ± 0.101	0.877 [0.79, 0.94]	L Frontal - L Frontal
MyConnectome	492	3.666 ± 2.031	54 ± 33 [60.721]	0.470 ± 0.176	0.874 [0.78, 0.94]	L Frontal - L Cingulate
MyConnectome	493	1.996 ± 0.980	29 ± 12 [39.201]	0.504 ± 0.121	0.926 [0.87, 0.96]	L Parietal - L Parietal
MyConnectome	494	3.236 ± 1.026	26 ± 11 [42.586]	0.195 ± 0.054	0.659 [0.50, 0.81]	L Frontal - L Frontal
MyConnectome	495	-	-	-	-	R Frontal - R Parietal
MyConnectome	496	2.379 ± 1.780	22 ± 10 [46.028]	0.456 ± 0.178	0.764 [0.62, 0.88]	R Frontal - R Frontal
MyConnectome	497	-	-	-	-	R Frontal - R Frontal
MyConnectome	498	1.571 ± 1.178	25 ± 10 [39.332]	0.528 ± 0.118	0.873 [0.79, 0.94]	R Frontal - R Frontal
MyConnectome	499	-	-	-	-	L Occipital - L Occipital
HCP	0	2.471 ± 0.644	360 ± 139 [38.550]	0.747 ± 0.081	0.903 [0.80, 0.96]	R Frontal - R Parietal
HCP	1	2.492 ± 0.377	249 ± 93 [37.361]	0.718 ± 0.052	0.935 [0.87, 0.97]	L Frontal - L Frontal
HCP	2	2.242 ± 0.362	214 ± 85 [39.830]	0.596 ± 0.074	0.943 [0.89, 0.97]	L Frontal - L Frontal
HCP	3	5.117 ± 4.417	1432 ± 311 [21.749]	0.727 ± 0.095	0.856 [0.71, 0.94]	R Frontal - R Temporal
HCP	4	3.343 ± 0.596	217 ± 77 [35.306]	0.741 ± 0.056	0.915 [0.84, 0.96]	R Frontal - R Frontal
HCP	5	2.620 ± 0.612	722 ± 242 [33.510]	0.704 ± 0.061	0.942 [0.88, 0.97]	L Occipital - L Occipital
HCP	6	2.842 ± 0.680	234 ± 68 [29.240]	0.700 ± 0.055	0.901 [0.82, 0.95]	R Frontal - R Frontal
HCP	7	3.663 ± 0.958	121 ± 41 [34.038]	0.515 ± 0.083	0.916 [0.85, 0.96]	L Parietal - L Parietal
HCP	8	2.338 ± 0.673	203 ± 46 [22.588]	0.676 ± 0.045	0.902 [0.81, 0.96]	L Frontal - L Frontal
HCP	9	3.112 ± 0.363	159 ± 89 [55.743]	0.588 ± 0.092	0.917 [0.84, 0.96]	R Frontal - R Frontal
HCP	10	3.363 ± 0.639	120 ± 64 [53.454]	0.529 ± 0.071	0.924 [0.85, 0.97]	L Parietal - L Parietal
HCP	11	3.622 ± 0.697	117 ± 54 [46.601]	0.512 ± 0.069	0.924 [0.86, 0.97]	L Parietal - L Parietal
HCP	12	2.552 ± 1.373	626 ± 124 [19.784]	0.671 ± 0.045	0.957 [0.91, 0.98]	R Occipital - R Occipital
HCP	13	3.635 ± 0.670	239 ± 106 [44.290]	0.660 ± 0.096	0.945 [0.89, 0.98]	L Frontal - L Frontal
HCP	14	3.646 ± 0.639	218 ± 80 [36.451]	0.629 ± 0.073	0.924 [0.85, 0.97]	L Frontal - L Frontal
HCP	15	2.671 ± 0.924	110 ± 56 [51.028]	0.481 ± 0.111	0.925 [0.86, 0.97]	R Frontal - R Frontal
HCP	16	3.051 ± 0.599	137 ± 57 [41.623]	0.547 ± 0.070	0.891 [0.79, 0.95]	R Parietal - R Parietal
HCP	17	3.162 ± 0.633	110 ± 73 [66.422]	0.459 ± 0.104	0.924 [0.86, 0.96]	L Parietal - L Parietal
HCP	18	4.023 ± 0.964	174 ± 106 [61.159]	0.553 ± 0.112	0.928 [0.86, 0.97]	L Frontal - L Parietal
HCP	19	2.797 ± 1.336	521 ± 201 [38.633]	0.638 ± 0.088	0.952 [0.90, 0.98]	R Temporal - R Temporal
HCP	20	2.584 ± 0.948	442 ± 152 [34.401]	0.641 ± 0.078	0.943 [0.88, 0.98]	L Frontal - L Frontal
HCP	21	3.664 ± 0.393	135 ± 72 [52.929]	0.584 ± 0.097	0.932 [0.87, 0.97]	R Frontal - R Frontal
HCP	22	2.834 ± 0.967	573 ± 177 [30.865]	0.675 ± 0.049	0.958 [0.91, 0.98]	R Parietal - R Parietal
HCP	23	2.781 ± 0.870	560 ± 209 [37.337]	0.608 ± 0.076	0.898 [0.78, 0.96]	L Temporal - L Temporal
HCP	24	2.704 ± 0.630	277 ± 148 [53.239]	0.648 ± 0.093	0.969 [0.94, 0.99]	R Frontal - R Frontal
HCP	25	2.678 ± 0.655	170 ± 57 [33.695]	0.715 ± 0.055	0.924 [0.84, 0.97]	L Frontal - L Frontal
HCP	26	2.086 ± 0.492	195 ± 74 [38.184]	0.682 ± 0.073	0.934 [0.87, 0.97]	L Frontal - L Frontal
HCP	27	3.331 ± 0.573	106 ± 35 [32.719]	0.592 ± 0.067	0.908 [0.83, 0.96]	L Frontal - L Frontal
HCP	28	2.953 ± 0.663	213 ± 63 [29.716]	0.591 ± 0.078	0.923 [0.85, 0.97]	L Parietal - L Parietal
HCP	29	2.638 ± 0.687	556 ± 181 [32.506]	0.692 ± 0.057	0.945 [0.89, 0.98]	R Parietal - R Temporal
HCP	30	2.629 ± 1.236	484 ± 206 [42.508]	0.644 ± 0.095	0.925 [0.84, 0.97]	R Occipital - R Occipital
HCP	31	2.662 ± 0.769	170 ± 86 [50.750]	0.636 ± 0.084	0.877 [0.77, 0.94]	R Temporal - R Temporal
HCP	32	2.942 ± 0.455	92 ± 43 [46.756]	0.661 ± 0.082	0.922 [0.86, 0.96]	L Frontal - L Parietal
HCP	33	2.344 ± 0.527	296 ± 118 [39.952]	0.670 ± 0.084	0.908 [0.81, 0.96]	R Occipital - R Occipital
HCP	34	2.888 ± 0.738	296 ± 118 [39.903]	0.661 ± 0.083	0.912 [0.81, 0.96]	R Temporal - R Temporal
HCP	35	2.810 ± 0.657	249 ± 101 [40.608]	0.592 ± 0.068	0.917 [0.82, 0.96]	L Occipital - L Occipital
HCP	36	2.211 ± 0.507	197 ± 96 [48.842]	0.618 ± 0.100	0.916 [0.84, 0.96]	L Frontal - L Frontal
HCP	37	3.538 ± 0.517	165 ± 111 [67.142]	0.540 ± 0.112	0.929 [0.87, 0.97]	L Frontal - L Frontal
HCP	38	2.450 ± 0.522	161 ± 81 [49.878]	0.635 ± 0.084	0.902 [0.81, 0.96]	R Frontal - R Frontal
HCP	39	2.415 ± 0.634	315 ± 100 [31.658]	0.737 ± 0.060	0.959 [0.92, 0.98]	L Parietal - L Parietal
HCP	40	4.172 ± 0.727	127 ± 55 [43.289]	0.497 ± 0.088	0.905 [0.83, 0.96]	L Parietal - L Parietal
HCP	41	2.698 ± 0.640	569 ± 161 [28.257]	0.694 ± 0.039	0.966 [0.92, 0.99]	R Parietal - R Parietal
HCP	42	2.473 ± 0.539	270 ± 82 [30.547]	0.784 ± 0.066	0.603 [0.39, 0.79]	Cerebellum
HCP	43	2.468 ± 0.818	245 ± 119 [48.777]	0.637 ± 0.081	0.936 [0.86, 0.97]	L Parietal - L Occipital
HCP	44	2.677 ± 0.613	162 ± 75 [46.086]	0.612 ± 0.093	0.943 [0.90, 0.97]	L Frontal - L Frontal
HCP	45	3.551 ± 1.200	808 ± 305 [37.717]	0.804 ± 0.083	0.834 [0.69, 0.92]	L Occipital - L Occipital
HCP	46	2.668 ± 0.465	257 ± 115 [44.714]	0.644 ± 0.088	0.882 [0.78, 0.95]	R Frontal - R Frontal
HCP	47	4.111 ± 0.473	231 ± 97 [42.094]	0.639 ± 0.076	0.937 [0.87, 0.97]	R Temporal - R Temporal
HCP	48	3.166 ± 0.596	93 ± 46 [49.451]	0.534 ± 0.096	0.930 [0.87, 0.97]	R Frontal - R Frontal
HCP	49	3.253 ± 0.583	98 ± 49 [49.739]	0.678 ± 0.060	0.936 [0.88, 0.97]	L Frontal - L Parietal
HCP	50	2.538 ± 0.584	299 ± 77 [25.770]	0.688 ± 0.042	0.912 [0.82, 0.96]	L Temporal - L Temporal
HCP	51	2.701 ± 0.623	190 ± 61 [32.288]	0.661 ± 0.075	0.919 [0.84, 0.96]	L Frontal - L Frontal
HCP	52	2.974 ± 1.347	236 ± 109 [46.332]	0.546 ± 0.094	0.893 [0.78, 0.95]	L Temporal - L Temporal
HCP	53	2.010 ± 0.288	154 ± 47 [30.358]	0.726 ± 0.098	0.945 [0.89, 0.98]	L Frontal - L Parietal
HCP	54	2.978 ± 0.446	101 ± 31 [30.628]	0.625 ± 0.049	0.910 [0.82, 0.96]	R Temporal - R Temporal
HCP	55	2.648 ± 0.518	137 ± 66 [48.435]	0.568 ± 0.091	0.934 [0.87, 0.97]	R Frontal - R Frontal
HCP	56	2.441 ± 0.528	121 ± 41 [33.490]	0.619 ± 0.063	0.896 [0.79, 0.95]	L Parietal - L Temporal
HCP	57	2.353 ± 0.518	146 ± 62 [42.303]	0.657 ± 0.074	0.938 [0.88, 0.97]	L Frontal - L Frontal
HCP	58	3.321 ± 0.534	206 ± 102 [49.723]	0.634 ± 0.058	0.928 [0.85, 0.97]	R Parietal - R Parietal
HCP	59	2.059 ± 0.639	423 ± 135 [31.790]	0.644 ± 0.073	0.949 [0.89, 0.98]	L Parietal - L Parietal
HCP	60	2.561 ± 0.730	223 ± 105 [47.021]	0.595 ± 0.075	0.925 [0.84, 0.97]	R Temporal - R Temporal
HCP	61	2.916 ± 0.575	205 ± 86 [41.846]	0.549 ± 0.093	0.924 [0.85, 0.97]	R Parietal - R Parietal
HCP	62	3.290 ± 1.031	228 ± 125 [54.688]	0.571 ± 0.097	0.933 [0.87, 0.97]	L Frontal - L Frontal
HCP	63	2.223 ± 0.604	312 ± 100 [32.003]	0.649 ± 0.063	0.939 [0.87, 0.97]	R Frontal - R Frontal
HCP	64	2.061 ± 0.378	244 ± 77 [31.585]	0.755 ± 0.070	0.950 [0.91, 0.98]	L Frontal - L Parietal
HCP	65	2.941 ± 1.349	151 ± 74 [48.965]	0.544 ± 0.088	0.916 [0.83, 0.96]	L Frontal - L Frontal
HCP	66	2.393 ± 0.723	284 ± 78 [27.430]	0.589 ± 0.052	0.954 [0.91, 0.98]	L Parietal - L Parietal
HCP	67	3.851 ± 0.953	130 ± 64 [49.105]	0.528 ± 0.090	0.918 [0.84, 0.96]	L Parietal - L Parietal
HCP	68	2.885 ± 0.507	167 ± 55 [32.698]	0.715 ± 0.061	0.906 [0.81, 0.96]	L Frontal - L Frontal
HCP	69	2.857 ± 0.775	70 ± 38 [54.863]	0.400 ± 0.110	0.916 [0.85, 0.96]	L Parietal - L Parietal
HCP	70	2.737 ± 0.581	249 ± 87 [34.942]	0.614 ± 0.065	0.940 [0.88, 0.97]	R Parietal - R Parietal
HCP	71	2.470 ± 0.539	267 ± 101 [37.630]	0.620 ± 0.071	0.921 [0.84, 0.97]	L Temporal - L Temporal
HCP	72	3.561 ± 1.021	56 ± 30 [54.134]	0.358 ± 0.087	0.907 [0.84, 0.96]	L Parietal - L Parietal
HCP	73	2.689 ± 0.701	293 ± 203 [69.281]	0.527 ± 0.100	0.947 [0.90, 0.98]	L Parietal - L Parietal
HCP	74	2.610 ± 0.700	507 ± 271 [53.437]	0.658 ± 0.096	0.927 [0.84, 0.97]	R Occipital - R Occipital
HCP	75	2.715 ± 0.548	182 ± 69 [37.914]	0.624 ± 0.084	0.909 [0.83, 0.96]	R Parietal - R Parietal
HCP	76	2.000 ± 0.561	80 ± 26 [32.445]	0.669 ± 0.088	0.936 [0.88, 0.97]	R Frontal - R Parietal
HCP	77	4.239 ± 1.421	168 ± 65 [38.707]	0.538 ± 0.094	0.938 [0.88, 0.97]	L Parietal - L Parietal
HCP	78	3.111 ± 1.346	128 ± 61 [47.742]	0.569 ± 0.114	0.852 [0.73, 0.93]	R Frontal - R Frontal
HCP	79	2.895 ± 0.439	166 ± 52 [31.446]	0.707 ± 0.061	0.910 [0.85, 0.96]	L Frontal - L Frontal
HCP	80	2.689 ± 0.470	107 ± 38 [35.470]	0.734 ± 0.077	0.937 [0.89, 0.97]	R Frontal - R Parietal
HCP	81	3.341 ± 1.112	191 ± 52 [27.251]	0.564 ± 0.053	0.943 [0.89, 0.97]	L Parietal - L Parietal
HCP	82	2.980 ± 0.383	124 ± 62 [49.977]	0.632 ± 0.091	0.925 [0.86, 0.97]	L Frontal - L Parietal
HCP	83	2.833 ± 0.741	118 ± 61 [51.792]	0.553 ± 0.106	0.898 [0.81, 0.95]	L Frontal - L Frontal
HCP	84	2.205 ± 0.439	101 ± 51 [50.530]	0.566 ± 0.060	0.919 [0.85, 0.96]	R Frontal - R Frontal
HCP	85	3.312 ± 0.630	361 ± 213 [58.920]	0.650 ± 0.083	0.953 [0.91, 0.98]	L Parietal - L Cingulate
HCP	86	3.260 ± 0.676	153 ± 66 [43.484]	0.549 ± 0.072	0.919 [0.85, 0.96]	L Parietal - L Parietal
HCP	87	2.991 ± 0.803	83 ± 35 [42.069]	0.462 ± 0.083	0.879 [0.78, 0.94]	L Frontal - L Frontal
HCP	88	3.725 ± 0.639	90 ± 46 [50.632]	0.456 ± 0.088	0.881 [0.79, 0.94]	R Parietal - R Parietal
HCP	89	3.410 ± 0.376	105 ± 44 [41.800]	0.510 ± 0.071	0.908 [0.83, 0.96]	R Parietal - R Parietal
HCP	90	3.032 ± 0.737	138 ± 62 [44.764]	0.578 ± 0.104	0.926 [0.86, 0.97]	R Frontal - R Frontal
HCP	91	2.733 ± 1.026	270 ± 116 [43.085]	0.530 ± 0.084	0.934 [0.86, 0.97]	L Frontal - L Frontal
HCP	92	2.548 ± 0.357	133 ± 41 [30.970]	0.654 ± 0.063	0.932 [0.87, 0.97]	L Frontal - L Frontal
HCP	93	4.160 ± 1.266	59 ± 28 [48.507]	0.363 ± 0.092	0.905 [0.83, 0.96]	R Parietal - R Parietal
HCP	94	3.013 ± 0.687	176 ± 53 [29.897]	0.637 ± 0.048	0.909 [0.82, 0.96]	L Parietal - L Parietal
HCP	95	2.117 ± 0.434	146 ± 53 [36.358]	0.672 ± 0.053	0.928 [0.85, 0.97]	R Parietal - R Temporal
HCP	96	2.751 ± 0.885	225 ± 112 [49.678]	0.583 ± 0.125	0.949 [0.90, 0.98]	R Parietal - R Parietal
HCP	97	2.627 ± 0.480	169 ± 68 [39.955]	0.589 ± 0.113	0.919 [0.84, 0.96]	R Frontal - R Frontal
HCP	98	3.253 ± 0.893	243 ± 101 [41.520]	0.575 ± 0.072	0.943 [0.88, 0.98]	L Temporal - L Temporal
HCP	99	2.552 ± 0.959	168 ± 77 [45.688]	0.553 ± 0.101	0.929 [0.85, 0.97]	L Parietal - L Parietal
HCP	100	4.306 ± 2.104	488 ± 215 [44.106]	0.538 ± 0.093	0.888 [0.76, 0.95]	L Temporal - L Temporal
HCP	101	2.421 ± 0.310	169 ± 64 [37.681]	0.659 ± 0.062	0.902 [0.80, 0.96]	L Temporal - L Temporal
HCP	102	2.503 ± 0.483	86 ± 42 [48.405]	0.513 ± 0.105	0.912 [0.83, 0.96]	R Frontal - R Frontal
HCP	103	2.386 ± 0.924	192 ± 50 [25.966]	0.644 ± 0.042	0.868 [0.74, 0.94]	R Frontal - R Frontal
HCP	104	3.207 ± 0.860	89 ± 45 [50.254]	0.455 ± 0.103	0.924 [0.86, 0.97]	L Parietal - L Parietal
HCP	105	2.459 ± 0.415	225 ± 60 [26.793]	0.602 ± 0.066	0.918 [0.85, 0.96]	L Frontal - L Frontal
HCP	106	2.329 ± 0.501	70 ± 39 [55.604]	0.548 ± 0.087	0.912 [0.83, 0.96]	L Frontal - L Parietal
HCP	107	2.853 ± 0.663	153 ± 61 [39.509]	0.718 ± 0.083	0.954 [0.91, 0.98]	R Frontal - R Frontal
HCP	108	3.213 ± 0.554	199 ± 120 [59.966]	0.599 ± 0.112	0.910 [0.83, 0.96]	R Frontal - R Frontal
HCP	109	3.168 ± 0.580	150 ± 65 [43.643]	0.550 ± 0.099	0.925 [0.86, 0.97]	R Parietal - R Parietal
HCP	110	3.357 ± 0.980	56 ± 29 [51.957]	0.454 ± 0.093	0.903 [0.81, 0.96]	R Frontal - R Frontal
HCP	111	4.452 ± 0.756	76 ± 44 [58.330]	0.417 ± 0.120	0.911 [0.85, 0.96]	L Parietal - L Parietal
HCP	112	4.296 ± 1.629	336 ± 174 [51.836]	0.553 ± 0.105	0.883 [0.77, 0.95]	R Temporal - R Temporal
HCP	113	2.687 ± 0.587	242 ± 148 [61.075]	0.583 ± 0.107	0.940 [0.89, 0.97]	R Frontal - R Frontal
HCP	114	2.279 ± 0.458	135 ± 40 [29.456]	0.710 ± 0.055	0.937 [0.88, 0.97]	L Frontal - L Parietal
HCP	115	4.092 ± 0.811	72 ± 29 [39.926]	0.450 ± 0.090	0.887 [0.79, 0.95]	R Parietal - R Parietal
HCP	116	2.164 ± 0.531	201 ± 49 [24.256]	0.692 ± 0.045	0.937 [0.87, 0.97]	R Frontal - R Parietal
HCP	117	2.790 ± 0.370	111 ± 57 [51.095]	0.516 ± 0.097	0.912 [0.85, 0.96]	L Frontal - L Frontal
HCP	118	2.995 ± 0.637	70 ± 44 [62.598]	0.438 ± 0.106	0.931 [0.88, 0.97]	L Frontal - L Frontal
HCP	119	2.726 ± 0.985	242 ± 108 [44.769]	0.595 ± 0.095	0.952 [0.91, 0.98]	L Frontal - L Frontal
HCP	120	2.543 ± 0.563	194 ± 93 [48.025]	0.591 ± 0.075	0.956 [0.91, 0.98]	L Parietal - L Parietal
HCP	121	2.669 ± 0.694	104 ± 40 [38.795]	0.477 ± 0.079	0.906 [0.82, 0.96]	L Frontal - L Frontal
HCP	122	2.895 ± 0.800	79 ± 45 [57.636]	0.487 ± 0.095	0.890 [0.80, 0.95]	R Parietal - R Parietal
HCP	123	3.555 ± 1.396	159 ± 56 [35.158]	0.481 ± 0.078	0.917 [0.84, 0.96]	L Parietal - L Occipital
HCP	124	3.631 ± 0.825	194 ± 111 [57.184]	0.541 ± 0.103	0.936 [0.88, 0.97]	L Parietal - L Parietal
HCP	125	2.650 ± 0.686	107 ± 46 [43.102]	0.558 ± 0.080	0.864 [0.75, 0.94]	R Temporal - R Temporal
HCP	126	2.335 ± 0.701	270 ± 93 [34.422]	0.652 ± 0.043	0.935 [0.87, 0.97]	R Occipital - R Occipital
HCP	127	3.511 ± 0.738	157 ± 78 [49.857]	0.476 ± 0.079	0.946 [0.90, 0.98]	R Parietal - R Parietal
HCP	128	2.492 ± 0.562	217 ± 41 [18.738]	0.593 ± 0.056	0.960 [0.92, 0.98]	L Parietal - L Parietal
HCP	129	3.257 ± 0.642	113 ± 65 [57.461]	0.571 ± 0.105	0.924 [0.85, 0.97]	R Frontal - R Frontal
HCP	130	4.314 ± 0.774	51 ± 40 [77.008]	0.355 ± 0.106	0.879 [0.77, 0.95]	R Frontal - R Parietal
HCP	131	3.573 ± 0.889	140 ± 48 [34.664]	0.680 ± 0.077	0.907 [0.82, 0.96]	L Parietal - L Temporal
HCP	132	2.493 ± 0.859	52 ± 22 [41.789]	0.458 ± 0.098	0.914 [0.84, 0.96]	L Frontal - L Frontal
HCP	133	2.725 ± 0.596	78 ± 18 [23.458]	0.519 ± 0.045	0.897 [0.82, 0.95]	L Temporal - L Temporal
HCP	134	3.174 ± 0.646	117 ± 36 [30.607]	0.570 ± 0.056	0.931 [0.87, 0.97]	R Parietal - R Parietal
HCP	135	2.887 ± 0.401	56 ± 46 [83.326]	0.467 ± 0.106	0.896 [0.82, 0.95]	R Frontal - R Frontal
HCP	136	3.026 ± 0.359	59 ± 40 [68.154]	0.619 ± 0.104	0.819 [0.69, 0.91]	L Frontal - L Parietal
HCP	137	2.396 ± 0.517	205 ± 80 [39.116]	0.682 ± 0.084	0.843 [0.71, 0.93]	R Frontal - R Frontal
HCP	138	2.604 ± 1.164	117 ± 33 [28.396]	0.564 ± 0.062	0.913 [0.83, 0.96]	R Frontal - R Frontal
HCP	139	2.652 ± 0.846	304 ± 114 [37.691]	0.615 ± 0.062	0.869 [0.74, 0.94]	L Occipital - L Occipital
HCP	140	2.945 ± 0.627	81 ± 44 [55.227]	0.529 ± 0.087	0.866 [0.75, 0.94]	R Parietal - R Parietal
HCP	141	2.873 ± 0.602	98 ± 47 [48.053]	0.549 ± 0.105	0.913 [0.84, 0.96]	L Frontal - L Frontal
HCP	142	4.588 ± 1.037	65 ± 25 [37.889]	0.381 ± 0.091	0.925 [0.87, 0.96]	L Parietal - L Parietal
HCP	143	2.354 ± 0.808	79 ± 50 [63.032]	0.468 ± 0.119	0.917 [0.85, 0.96]	R Frontal - R Frontal
HCP	144	2.707 ± 0.877	151 ± 79 [52.583]	0.556 ± 0.120	0.915 [0.84, 0.96]	R Frontal - R Frontal
HCP	145	2.748 ± 0.606	435 ± 98 [22.596]	0.761 ± 0.036	0.515 [0.29, 0.73]	Cerebellum
HCP	146	3.473 ± 1.630	164 ± 38 [23.365]	0.540 ± 0.066	0.905 [0.82, 0.96]	L Frontal - L Frontal
HCP	147	2.410 ± 1.095	116 ± 48 [41.970]	0.554 ± 0.082	0.921 [0.84, 0.97]	L Frontal - L Frontal
HCP	148	3.217 ± 0.573	120 ± 75 [62.110]	0.536 ± 0.115	0.900 [0.83, 0.95]	L Frontal - L Frontal
HCP	149	3.111 ± 1.063	167 ± 58 [35.117]	0.563 ± 0.085	0.894 [0.79, 0.95]	L Parietal - L Parietal
HCP	150	3.165 ± 0.747	66 ± 30 [45.542]	0.429 ± 0.084	0.869 [0.76, 0.94]	R Parietal - R Parietal
HCP	151	2.550 ± 0.697	135 ± 54 [39.909]	0.575 ± 0.071	0.928 [0.86, 0.97]	R Parietal - R Parietal
HCP	152	2.368 ± 0.559	136 ± 51 [37.753]	0.568 ± 0.086	0.920 [0.85, 0.96]	L Frontal - L Frontal
HCP	153	3.932 ± 0.863	55 ± 32 [57.861]	0.429 ± 0.117	0.925 [0.87, 0.96]	R Frontal - R Frontal
HCP	154	3.160 ± 0.847	87 ± 52 [59.635]	0.529 ± 0.101	0.839 [0.71, 0.92]	R Frontal - R Frontal
HCP	155	2.633 ± 0.304	216 ± 74 [34.155]	0.635 ± 0.066	0.944 [0.89, 0.98]	R Frontal - R Frontal
HCP	156	2.529 ± 0.349	144 ± 82 [57.295]	0.591 ± 0.099	0.920 [0.86, 0.96]	R Frontal - R Frontal
HCP	157	2.638 ± 0.676	116 ± 58 [50.259]	0.576 ± 0.110	0.898 [0.81, 0.95]	R Frontal - R Frontal
HCP	158	2.708 ± 0.293	92 ± 32 [35.442]	0.672 ± 0.070	0.919 [0.85, 0.96]	L Frontal - L Parietal
HCP	159	2.531 ± 0.882	77 ± 31 [40.261]	0.576 ± 0.079	0.925 [0.85, 0.97]	L Frontal - L Frontal
HCP	160	3.623 ± 0.942	62 ± 35 [56.291]	0.447 ± 0.112	0.897 [0.82, 0.95]	L Frontal - L Frontal
HCP	161	1.997 ± 0.461	494 ± 123 [24.888]	0.746 ± 0.034	0.957 [0.90, 0.98]	L Frontal - L Frontal
HCP	162	2.289 ± 0.475	81 ± 47 [57.749]	0.514 ± 0.095	0.919 [0.86, 0.96]	L Frontal - L Frontal
HCP	163	2.726 ± 0.510	87 ± 45 [51.408]	0.512 ± 0.104	0.920 [0.86, 0.96]	L Frontal - L Frontal
HCP	164	2.771 ± 0.654	101 ± 46 [45.308]	0.563 ± 0.083	0.918 [0.84, 0.96]	L Frontal - L Frontal
HCP	165	2.772 ± 0.421	116 ± 36 [30.933]	0.752 ± 0.045	0.942 [0.90, 0.97]	R Frontal - R Parietal
HCP	166	2.383 ± 0.741	125 ± 67 [53.949]	0.564 ± 0.104	0.900 [0.81, 0.96]	R Occipital - R Occipital
HCP	167	2.727 ± 0.652	103 ± 50 [48.193]	0.523 ± 0.086	0.895 [0.81, 0.95]	R Frontal - R Frontal
HCP	168	3.774 ± 1.023	63 ± 36 [56.845]	0.381 ± 0.099	0.847 [0.72, 0.93]	L Parietal - L Parietal
HCP	169	2.500 ± 0.525	114 ± 80 [70.036]	0.527 ± 0.091	0.915 [0.84, 0.96]	R Parietal - R Parietal
HCP	170	1.211 ± 0.448	82 ± 23 [27.895]	0.735 ± 0.030	0.928 [0.86, 0.97]	R Frontal - R Parietal
HCP	171	2.527 ± 0.733	166 ± 83 [50.207]	0.563 ± 0.106	0.882 [0.78, 0.95]	R Frontal - R Frontal
HCP	172	2.557 ± 0.507	97 ± 55 [57.083]	0.563 ± 0.076	0.933 [0.87, 0.97]	L Frontal - L Frontal
HCP	173	2.903 ± 0.972	73 ± 36 [50.114]	0.485 ± 0.117	0.918 [0.85, 0.96]	R Parietal - R Parietal
HCP	174	2.698 ± 0.573	142 ± 64 [44.739]	0.526 ± 0.106	0.935 [0.88, 0.97]	R Frontal - R Frontal
HCP	175	4.513 ± 1.487	97 ± 42 [42.891]	0.489 ± 0.086	0.928 [0.86, 0.97]	L Frontal - L Frontal
HCP	176	3.318 ± 0.953	139 ± 73 [52.199]	0.501 ± 0.114	0.905 [0.81, 0.96]	R Parietal - R Parietal
HCP	177	2.618 ± 0.584	259 ± 71 [27.254]	0.578 ± 0.073	0.923 [0.84, 0.97]	L Frontal - L Frontal
HCP	178	3.027 ± 0.661	105 ± 43 [40.573]	0.502 ± 0.090	0.910 [0.83, 0.96]	R Parietal - R Parietal
HCP	179	2.610 ± 0.727	94 ± 49 [52.098]	0.465 ± 0.084	0.826 [0.70, 0.92]	R Frontal - R Frontal
HCP	180	2.512 ± 0.837	121 ± 62 [51.451]	0.564 ± 0.094	0.917 [0.83, 0.96]	L Parietal - L Parietal
HCP	181	3.716 ± 1.439	168 ± 97 [57.725]	0.532 ± 0.085	0.892 [0.79, 0.95]	L Temporal - L Temporal
HCP	182	2.831 ± 0.715	75 ± 39 [51.667]	0.467 ± 0.096	0.915 [0.84, 0.96]	R Frontal - R Frontal
HCP	183	3.589 ± 1.447	200 ± 88 [43.956]	0.511 ± 0.117	0.900 [0.80, 0.96]	R Parietal - R Parietal
HCP	184	3.027 ± 1.691	191 ± 92 [48.094]	0.597 ± 0.108	0.944 [0.88, 0.98]	R Frontal - R Frontal
HCP	185	2.343 ± 0.409	115 ± 48 [41.570]	0.504 ± 0.110	0.901 [0.81, 0.96]	L Frontal - L Frontal
HCP	186	2.901 ± 1.045	86 ± 49 [56.973]	0.443 ± 0.104	0.913 [0.84, 0.96]	R Parietal - R Parietal
HCP	187	3.593 ± 1.438	110 ± 30 [27.068]	0.543 ± 0.089	0.879 [0.78, 0.94]	L Frontal - L Parietal
HCP	188	2.462 ± 0.602	148 ± 37 [25.151]	0.713 ± 0.046	0.948 [0.90, 0.98]	R Parietal - R Parietal
HCP	189	3.138 ± 0.871	86 ± 61 [70.833]	0.453 ± 0.117	0.924 [0.85, 0.97]	R Frontal - R Frontal
HCP	190	3.239 ± 1.493	291 ± 165 [56.830]	0.545 ± 0.115	0.915 [0.83, 0.96]	L Occipital - L Occipital
HCP	191	2.743 ± 0.514	90 ± 21 [22.942]	0.594 ± 0.066	0.942 [0.89, 0.97]	R Frontal - R Parietal
HCP	192	2.870 ± 0.501	57 ± 31 [55.470]	0.436 ± 0.131	0.908 [0.83, 0.96]	R Frontal - R Frontal
HCP	193	2.648 ± 0.514	92 ± 48 [52.005]	0.596 ± 0.087	0.909 [0.83, 0.96]	R Frontal - R Frontal
HCP	194	2.857 ± 0.841	87 ± 42 [48.520]	0.488 ± 0.115	0.920 [0.84, 0.96]	R Frontal - R Frontal
HCP	195	2.785 ± 0.626	66 ± 45 [67.932]	0.410 ± 0.104	0.899 [0.82, 0.95]	R Frontal - R Frontal
HCP	196	3.100 ± 0.779	217 ± 109 [50.139]	0.647 ± 0.060	0.937 [0.88, 0.97]	R Parietal - R Parietal
HCP	197	2.904 ± 0.546	72 ± 56 [78.080]	0.481 ± 0.138	0.838 [0.71, 0.92]	R Frontal - R Frontal
HCP	198	2.909 ± 0.435	105 ± 48 [45.779]	0.546 ± 0.106	0.914 [0.84, 0.96]	L Frontal - L Frontal
HCP	199	2.483 ± 0.509	99 ± 43 [42.981]	0.571 ± 0.069	0.951 [0.90, 0.98]	L Frontal - L Frontal
HCP	200	3.957 ± 1.102	59 ± 37 [62.628]	0.366 ± 0.100	0.925 [0.87, 0.96]	L Parietal - L Parietal
HCP	201	3.419 ± 0.881	74 ± 29 [39.689]	0.549 ± 0.082	0.861 [0.76, 0.93]	R Frontal - R Frontal
HCP	202	2.421 ± 0.507	104 ± 19 [17.992]	0.743 ± 0.031	0.950 [0.91, 0.98]	R Frontal - R Parietal
HCP	203	3.124 ± 0.614	118 ± 55 [46.772]	0.600 ± 0.096	0.943 [0.89, 0.97]	R Frontal - R Parietal
HCP	204	2.757 ± 0.701	111 ± 73 [65.832]	0.544 ± 0.112	0.890 [0.79, 0.95]	R Frontal - R Frontal
HCP	205	3.272 ± 0.977	142 ± 80 [56.289]	0.515 ± 0.103	0.859 [0.73, 0.94]	R Parietal - R Parietal
HCP	206	2.138 ± 0.519	85 ± 29 [34.551]	0.641 ± 0.091	0.920 [0.84, 0.96]	L Frontal - L Parietal
HCP	207	3.845 ± 1.139	49 ± 29 [57.933]	0.384 ± 0.130	0.857 [0.74, 0.93]	R Parietal - R Parietal
HCP	208	3.002 ± 0.478	105 ± 22 [20.865]	0.601 ± 0.053	0.890 [0.79, 0.95]	L Parietal - L Temporal
HCP	209	2.719 ± 0.920	290 ± 94 [32.486]	0.601 ± 0.070	0.948 [0.89, 0.98]	L Parietal - L Parietal
HCP	210	2.952 ± 0.726	178 ± 70 [39.121]	0.601 ± 0.086	0.919 [0.84, 0.96]	L Parietal - L Parietal
HCP	211	2.890 ± 0.459	64 ± 28 [44.244]	0.423 ± 0.066	0.902 [0.82, 0.95]	R Parietal - R Parietal
HCP	212	4.453 ± 0.696	88 ± 35 [39.408]	0.573 ± 0.080	0.920 [0.86, 0.96]	R Parietal - R Parietal
HCP	213	3.300 ± 0.979	67 ± 31 [46.796]	0.539 ± 0.102	0.921 [0.85, 0.96]	R Frontal - R Frontal
HCP	214	5.578 ± 0.608	36 ± 21 [59.247]	0.321 ± 0.097	0.877 [0.79, 0.94]	L Parietal - L Parietal
HCP	215	3.198 ± 0.684	66 ± 41 [61.395]	0.440 ± 0.121	0.876 [0.79, 0.94]	L Frontal - L Frontal
HCP	216	3.173 ± 0.506	122 ± 79 [64.944]	0.549 ± 0.111	0.878 [0.78, 0.94]	L Frontal - L Frontal
HCP	217	2.000 ± 0.312	135 ± 46 [34.099]	0.688 ± 0.054	0.945 [0.89, 0.98]	R Frontal - R Parietal
HCP	218	3.049 ± 0.629	103 ± 56 [54.200]	0.581 ± 0.097	0.930 [0.86, 0.97]	R Frontal - R Frontal
HCP	219	2.972 ± 0.779	53 ± 31 [58.248]	0.408 ± 0.088	0.857 [0.74, 0.93]	R Parietal - R Parietal
HCP	220	3.723 ± 1.263	34 ± 21 [62.947]	0.287 ± 0.105	0.845 [0.73, 0.93]	L Parietal - L Parietal
HCP	221	3.623 ± 0.561	69 ± 38 [54.633]	0.426 ± 0.105	0.874 [0.77, 0.94]	L Parietal - L Parietal
HCP	222	2.431 ± 0.576	765 ± 284 [37.149]	0.861 ± 0.040	0.835 [0.70, 0.92]	Cerebellum
HCP	223	3.490 ± 0.636	56 ± 36 [65.536]	0.502 ± 0.126	0.907 [0.83, 0.96]	L Frontal - L Parietal
HCP	224	2.787 ± 0.778	66 ± 23 [34.674]	0.590 ± 0.082	0.926 [0.86, 0.97]	L Frontal - L Parietal
HCP	225	2.555 ± 0.500	63 ± 22 [34.349]	0.633 ± 0.081	0.940 [0.89, 0.97]	R Frontal - R Parietal
HCP	226	3.103 ± 0.661	129 ± 43 [32.889]	0.565 ± 0.074	0.874 [0.76, 0.94]	R Parietal - R Temporal
HCP	227	2.669 ± 0.710	180 ± 95 [52.742]	0.514 ± 0.117	0.935 [0.88, 0.97]	L Temporal - L Temporal
HCP	228	3.011 ± 0.519	62 ± 18 [29.445]	0.511 ± 0.063	0.914 [0.84, 0.96]	R Parietal - R Temporal
HCP	229	2.256 ± 0.801	417 ± 168 [40.188]	0.630 ± 0.110	0.839 [0.67, 0.93]	R Occipital - R Occipital
HCP	230	2.418 ± 0.397	246 ± 84 [34.216]	0.673 ± 0.063	0.918 [0.84, 0.96]	L Frontal - L Frontal
HCP	231	3.760 ± 0.876	100 ± 34 [33.998]	0.533 ± 0.068	0.897 [0.80, 0.95]	L Parietal - L Parietal
HCP	232	3.435 ± 0.740	61 ± 32 [53.046]	0.357 ± 0.078	0.895 [0.80, 0.95]	R Parietal - R Parietal
HCP	233	2.336 ± 0.413	660 ± 104 [15.789]	0.874 ± 0.019	0.597 [0.38, 0.79]	Cerebellum
HCP	234	2.658 ± 0.722	186 ± 93 [50.240]	0.586 ± 0.081	0.913 [0.83, 0.96]	L Parietal - L Parietal
HCP	235	2.582 ± 1.085	107 ± 55 [51.776]	0.515 ± 0.122	0.918 [0.83, 0.96]	R Frontal - R Frontal
HCP	236	2.599 ± 0.466	125 ± 89 [71.519]	0.542 ± 0.083	0.926 [0.86, 0.97]	L Frontal - L Frontal
HCP	237	2.707 ± 0.872	139 ± 62 [44.344]	0.541 ± 0.120	0.916 [0.84, 0.96]	R Parietal - R Temporal
HCP	238	2.696 ± 0.989	125 ± 66 [53.132]	0.530 ± 0.106	0.934 [0.87, 0.97]	L Frontal - L Frontal
HCP	239	2.688 ± 0.407	85 ± 57 [66.425]	0.547 ± 0.129	0.890 [0.81, 0.95]	R Frontal - R Frontal
HCP	240	2.704 ± 0.638	147 ± 70 [47.545]	0.540 ± 0.075	0.912 [0.83, 0.96]	L Frontal - L Frontal
HCP	241	3.333 ± 1.208	72 ± 39 [54.167]	0.456 ± 0.092	0.891 [0.79, 0.95]	R Parietal - R Parietal
HCP	242	2.680 ± 1.007	217 ± 89 [40.964]	0.569 ± 0.098	0.919 [0.84, 0.96]	R Parietal - R Parietal
HCP	243	3.467 ± 0.412	53 ± 30 [56.226]	0.530 ± 0.110	0.890 [0.81, 0.95]	L Frontal - L Parietal
HCP	244	2.320 ± 0.342	48 ± 17 [34.440]	0.634 ± 0.055	0.922 [0.86, 0.96]	R Frontal - R Parietal
HCP	245	3.783 ± 1.622	363 ± 118 [32.568]	0.627 ± 0.078	0.939 [0.88, 0.97]	R Temporal - R Temporal
HCP	246	2.433 ± 0.685	213 ± 72 [34.024]	0.682 ± 0.096	0.733 [0.54, 0.87]	Cerebellum
HCP	247	4.050 ± 0.868	89 ± 47 [53.583]	0.506 ± 0.110	0.894 [0.81, 0.95]	R Parietal - R Parietal
HCP	248	2.872 ± 0.702	70 ± 50 [71.284]	0.453 ± 0.133	0.811 [0.65, 0.91]	R Frontal - R Frontal
HCP	249	2.375 ± 0.407	112 ± 41 [36.376]	0.557 ± 0.070	0.899 [0.81, 0.95]	R Parietal - R Parietal
HCP	250	2.558 ± 0.757	77 ± 29 [37.092]	0.578 ± 0.073	0.910 [0.83, 0.96]	L Parietal - L Parietal
HCP	251	3.467 ± 0.721	138 ± 64 [46.250]	0.475 ± 0.106	0.905 [0.82, 0.96]	L Frontal - L Frontal
HCP	252	2.738 ± 0.471	68 ± 45 [65.370]	0.434 ± 0.104	0.880 [0.77, 0.95]	R Occipital - R Occipital
HCP	253	3.767 ± 0.683	33 ± 19 [57.456]	0.356 ± 0.100	0.841 [0.73, 0.92]	R Parietal - R Parietal
HCP	254	2.932 ± 0.476	91 ± 37 [40.659]	0.687 ± 0.084	0.812 [0.69, 0.91]	R Frontal - R Frontal
HCP	255	2.801 ± 0.773	128 ± 55 [43.294]	0.580 ± 0.130	0.888 [0.80, 0.95]	R Frontal - R Frontal
HCP	256	2.530 ± 0.437	236 ± 92 [39.025]	0.659 ± 0.103	0.917 [0.85, 0.96]	L Frontal - L Frontal
HCP	257	2.660 ± 0.559	129 ± 59 [45.798]	0.629 ± 0.076	0.943 [0.88, 0.98]	L Temporal - L Temporal
HCP	258	3.331 ± 0.488	83 ± 32 [38.693]	0.694 ± 0.074	0.951 [0.91, 0.98]	R Frontal - R Parietal
HCP	259	2.019 ± 0.516	149 ± 45 [29.878]	0.607 ± 0.062	0.953 [0.90, 0.98]	R Parietal - R Parietal
HCP	260	2.715 ± 0.680	148 ± 65 [43.645]	0.554 ± 0.078	0.942 [0.89, 0.97]	L Frontal - L Frontal
HCP	261	3.329 ± 0.361	45 ± 22 [47.855]	0.569 ± 0.089	0.945 [0.90, 0.97]	R Frontal - R Parietal
HCP	262	3.490 ± 0.684	65 ± 37 [56.664]	0.476 ± 0.121	0.913 [0.85, 0.96]	R Frontal - R Frontal
HCP	263	3.754 ± 2.585	531 ± 162 [30.438]	0.686 ± 0.117	0.719 [0.53, 0.86]	Cerebellum
HCP	264	2.714 ± 0.669	41 ± 26 [63.471]	0.381 ± 0.086	0.874 [0.78, 0.94]	L Parietal - L Parietal
HCP	265	2.620 ± 0.547	139 ± 73 [52.971]	0.574 ± 0.112	0.889 [0.80, 0.95]	R Frontal - R Frontal
HCP	266	2.689 ± 0.734	161 ± 72 [44.784]	0.548 ± 0.106	0.933 [0.86, 0.97]	L Frontal - L Frontal
HCP	267	2.820 ± 0.762	50 ± 28 [55.527]	0.398 ± 0.096	0.901 [0.82, 0.95]	R Frontal - R Frontal
HCP	268	3.169 ± 0.784	47 ± 32 [67.427]	0.381 ± 0.106	0.906 [0.83, 0.96]	L Parietal - L Parietal
HCP	269	1.862 ± 0.537	112 ± 40 [35.487]	0.625 ± 0.070	0.942 [0.89, 0.97]	R Parietal - R Parietal
HCP	270	2.151 ± 0.558	124 ± 54 [43.816]	0.546 ± 0.074	0.923 [0.86, 0.96]	R Frontal - R Frontal
HCP	271	4.243 ± 1.653	51 ± 22 [42.295]	0.322 ± 0.091	0.780 [0.64, 0.89]	R Frontal - R Parietal
HCP	272	2.814 ± 0.891	75 ± 31 [41.265]	0.387 ± 0.095	0.862 [0.75, 0.94]	L Frontal - L Frontal
HCP	273	2.561 ± 0.690	60 ± 40 [66.762]	0.489 ± 0.096	0.899 [0.81, 0.95]	R Frontal - R Frontal
HCP	274	2.735 ± 0.413	67 ± 33 [48.228]	0.617 ± 0.092	0.929 [0.87, 0.97]	R Frontal - R Parietal
HCP	275	3.224 ± 1.246	67 ± 36 [53.478]	0.454 ± 0.135	0.904 [0.82, 0.96]	R Parietal - R Parietal
HCP	276	5.251 ± 3.886	101 ± 72 [71.895]	0.419 ± 0.155	0.912 [0.84, 0.96]	L Parietal - L Parietal
HCP	277	4.373 ± 1.104	57 ± 37 [64.031]	0.359 ± 0.115	0.879 [0.79, 0.94]	L Parietal - L Parietal
HCP	278	2.042 ± 0.468	107 ± 36 [33.689]	0.693 ± 0.066	0.935 [0.88, 0.97]	R Frontal - R Parietal
HCP	279	2.633 ± 0.453	186 ± 89 [48.009]	0.635 ± 0.104	0.904 [0.82, 0.96]	R Frontal - R Frontal
HCP	280	2.892 ± 0.849	173 ± 96 [55.564]	0.564 ± 0.116	0.908 [0.82, 0.96]	L Frontal - L Frontal
HCP	281	2.498 ± 0.537	39 ± 12 [30.291]	0.471 ± 0.069	0.857 [0.74, 0.93]	L Parietal - L Parietal
HCP	282	3.296 ± 0.747	52 ± 34 [64.102]	0.393 ± 0.104	0.866 [0.76, 0.94]	R Frontal - R Frontal
HCP	283	2.261 ± 0.513	167 ± 80 [48.142]	0.585 ± 0.098	0.950 [0.90, 0.98]	L Frontal - L Frontal
HCP	284	4.447 ± 1.018	82 ± 48 [58.111]	0.477 ± 0.092	0.840 [0.69, 0.93]	R Parietal - R Parietal
HCP	285	2.754 ± 0.395	46 ± 45 [96.513]	0.428 ± 0.136	0.847 [0.74, 0.93]	R Frontal - R Frontal
HCP	286	3.242 ± 0.770	49 ± 14 [28.857]	0.505 ± 0.066	0.939 [0.89, 0.97]	R Parietal - R Parietal
HCP	287	2.344 ± 0.654	188 ± 102 [54.396]	0.580 ± 0.088	0.914 [0.84, 0.96]	R Frontal - R Frontal
HCP	288	2.906 ± 0.889	81 ± 42 [52.047]	0.568 ± 0.102	0.918 [0.86, 0.96]	L Frontal - L Frontal
HCP	289	3.154 ± 0.640	84 ± 21 [24.886]	0.558 ± 0.060	0.900 [0.81, 0.95]	R Parietal - R Parietal
HCP	290	2.433 ± 0.775	177 ± 36 [20.371]	0.575 ± 0.052	0.951 [0.90, 0.98]	R Parietal - R Parietal
HCP	291	2.419 ± 0.376	95 ± 46 [47.962]	0.524 ± 0.090	0.924 [0.86, 0.97]	L Temporal - L Temporal
HCP	292	3.328 ± 0.854	48 ± 22 [46.573]	0.406 ± 0.086	0.872 [0.76, 0.94]	R Temporal - R Temporal
HCP	293	2.552 ± 0.717	53 ± 25 [47.891]	0.449 ± 0.093	0.827 [0.69, 0.92]	R Temporal - R Temporal
HCP	294	2.617 ± 0.390	84 ± 22 [25.729]	0.752 ± 0.040	0.915 [0.85, 0.96]	R Frontal - R Parietal
HCP	295	2.637 ± 0.597	128 ± 72 [56.409]	0.529 ± 0.100	0.938 [0.89, 0.97]	R Frontal - R Cingulate
HCP	296	2.810 ± 0.717	58 ± 21 [36.173]	0.426 ± 0.087	0.896 [0.81, 0.95]	L Temporal - L Temporal
HCP	297	3.570 ± 0.982	29 ± 16 [54.309]	0.272 ± 0.095	0.813 [0.69, 0.91]	R Parietal - R Parietal
HCP	298	2.814 ± 0.584	155 ± 93 [59.803]	0.553 ± 0.076	0.908 [0.82, 0.96]	L Parietal - L Parietal
HCP	299	2.298 ± 0.664	234 ± 64 [27.360]	0.651 ± 0.055	0.955 [0.92, 0.98]	R Parietal - R Parietal
HCP	300	2.792 ± 0.319	92 ± 20 [21.360]	0.669 ± 0.043	0.906 [0.83, 0.96]	L Frontal - L Frontal
HCP	301	3.221 ± 1.531	32 ± 22 [66.965]	0.335 ± 0.138	0.809 [0.70, 0.90]	R Parietal - R Parietal
HCP	302	3.212 ± 0.642	37 ± 24 [64.617]	0.409 ± 0.131	0.835 [0.73, 0.92]	R Frontal - R Frontal
HCP	303	2.632 ± 0.646	105 ± 53 [50.477]	0.480 ± 0.091	0.891 [0.81, 0.95]	R Frontal - R Frontal
HCP	304	2.856 ± 0.819	68 ± 29 [42.519]	0.513 ± 0.076	0.899 [0.80, 0.95]	R Parietal - R Parietal
HCP	305	2.487 ± 0.658	197 ± 96 [48.815]	0.662 ± 0.135	0.373 [0.20, 0.60]	Cerebellum
HCP	306	2.841 ± 0.972	89 ± 34 [38.578]	0.650 ± 0.052	0.946 [0.90, 0.98]	L Parietal - L Parietal
HCP	307	2.622 ± 0.729	46 ± 23 [50.213]	0.430 ± 0.098	0.920 [0.85, 0.96]	R Frontal - R Parietal
HCP	308	2.501 ± 0.464	124 ± 74 [59.247]	0.544 ± 0.079	0.885 [0.78, 0.95]	R Frontal - R Frontal
HCP	309	2.944 ± 0.842	50 ± 33 [66.357]	0.398 ± 0.114	0.905 [0.82, 0.96]	R Frontal - R Frontal
HCP	310	2.488 ± 0.713	120 ± 50 [41.993]	0.605 ± 0.094	0.960 [0.92, 0.98]	L Frontal - L Frontal
HCP	311	2.583 ± 0.564	62 ± 37 [59.569]	0.483 ± 0.090	0.921 [0.85, 0.96]	R Frontal - R Frontal
HCP	312	3.635 ± 0.638	73 ± 52 [71.027]	0.455 ± 0.140	0.916 [0.85, 0.96]	R Frontal - R Frontal
HCP	313	2.992 ± 0.983	44 ± 16 [36.765]	0.383 ± 0.066	0.901 [0.83, 0.95]	R Frontal - R Frontal
HCP	314	3.701 ± 1.851	69 ± 32 [46.191]	0.399 ± 0.074	0.854 [0.72, 0.93]	L Temporal - L Temporal
HCP	315	2.265 ± 0.579	111 ± 47 [41.841]	0.697 ± 0.102	0.928 [0.86, 0.97]	L Frontal - L Parietal
HCP	316	1.826 ± 0.551	76 ± 21 [27.453]	0.684 ± 0.079	0.956 [0.92, 0.98]	R Parietal - R Parietal
HCP	317	2.905 ± 1.419	423 ± 139 [32.870]	0.681 ± 0.091	0.942 [0.88, 0.97]	R Parietal - R Cingulate
HCP	318	3.172 ± 0.725	50 ± 23 [45.116]	0.404 ± 0.094	0.877 [0.77, 0.94]	L Parietal - L Parietal
HCP	319	4.268 ± 0.785	65 ± 33 [51.080]	0.516 ± 0.117	0.914 [0.85, 0.96]	R Frontal - R Frontal
HCP	320	2.890 ± 0.762	104 ± 46 [43.930]	0.537 ± 0.103	0.885 [0.77, 0.95]	R Parietal - R Parietal
HCP	321	2.644 ± 0.535	61 ± 43 [69.883]	0.454 ± 0.106	0.902 [0.82, 0.95]	R Frontal - R Frontal
HCP	322	2.335 ± 0.622	59 ± 46 [77.507]	0.461 ± 0.134	0.868 [0.77, 0.94]	L Frontal - L Frontal
HCP	323	3.729 ± 0.956	46 ± 28 [61.088]	0.330 ± 0.108	0.864 [0.76, 0.94]	L Frontal - L Frontal
HCP	324	3.274 ± 1.534	167 ± 67 [40.056]	0.462 ± 0.110	0.839 [0.69, 0.93]	L Occipital - L Occipital
HCP	325	3.280 ± 0.436	79 ± 39 [50.094]	0.544 ± 0.131	0.919 [0.86, 0.96]	R Frontal - R Frontal
HCP	326	3.568 ± 1.071	31 ± 23 [73.987]	0.287 ± 0.106	0.811 [0.68, 0.91]	R Parietal - R Parietal
HCP	327	2.710 ± 0.691	83 ± 55 [65.977]	0.492 ± 0.110	0.914 [0.84, 0.96]	L Parietal - L Parietal
HCP	328	3.423 ± 0.743	64 ± 41 [64.083]	0.375 ± 0.099	0.858 [0.75, 0.93]	R Frontal - R Frontal
HCP	329	2.282 ± 0.381	76 ± 33 [42.826]	0.524 ± 0.111	0.922 [0.85, 0.96]	R Frontal - R Frontal
HCP	330	2.990 ± 1.113	39 ± 27 [69.956]	0.334 ± 0.122	0.864 [0.77, 0.93]	R Parietal - R Parietal
HCP	331	3.263 ± 0.806	97 ± 78 [81.136]	0.430 ± 0.103	0.900 [0.81, 0.95]	R Frontal - R Frontal
HCP	332	3.197 ± 0.700	34 ± 22 [65.891]	0.344 ± 0.106	0.882 [0.80, 0.94]	L Frontal - L Frontal
HCP	333	2.925 ± 0.502	63 ± 36 [56.809]	0.475 ± 0.107	0.869 [0.76, 0.94]	R Frontal - R Frontal
HCP	334	2.433 ± 0.629	45 ± 28 [62.842]	0.404 ± 0.101	0.855 [0.75, 0.93]	R Parietal - R Parietal
HCP	335	2.821 ± 0.394	169 ± 94 [55.495]	0.510 ± 0.097	0.892 [0.79, 0.95]	R Occipital - R Occipital
HCP	336	1.991 ± 0.398	89 ± 50 [55.582]	0.603 ± 0.111	0.937 [0.89, 0.97]	L Frontal - L Frontal
HCP	337	2.702 ± 0.556	75 ± 42 [55.941]	0.490 ± 0.106	0.854 [0.74, 0.93]	L Frontal - L Frontal
HCP	338	2.483 ± 0.476	115 ± 42 [36.266]	0.649 ± 0.100	0.860 [0.74, 0.94]	L Frontal - L Frontal
HCP	339	2.185 ± 0.579	40 ± 18 [45.967]	0.405 ± 0.103	0.903 [0.82, 0.96]	R Frontal - R Frontal
HCP	340	2.886 ± 0.651	131 ± 75 [57.511]	0.524 ± 0.125	0.911 [0.84, 0.96]	R Frontal - R Frontal
HCP	341	2.529 ± 0.983	250 ± 136 [54.341]	0.602 ± 0.115	0.929 [0.86, 0.97]	L Occipital - L Occipital
HCP	342	2.855 ± 1.629	136 ± 65 [47.690]	0.514 ± 0.129	0.893 [0.80, 0.95]	L Occipital - L Occipital
HCP	343	7.113 ± 0.556	13 ± 7 [52.048]	0.197 ± 0.068	0.837 [0.74, 0.92]	R Parietal - R Parietal
HCP	344	3.202 ± 0.333	41 ± 10 [23.737]	0.629 ± 0.038	0.934 [0.88, 0.97]	R Frontal - R Parietal
HCP	345	3.238 ± 0.942	127 ± 119 [93.908]	0.484 ± 0.129	0.922 [0.86, 0.96]	R Frontal - R Frontal
HCP	346	1.998 ± 0.457	102 ± 37 [35.819]	0.633 ± 0.102	0.941 [0.88, 0.97]	L Frontal - L Parietal
HCP	347	3.255 ± 0.386	51 ± 30 [58.081]	0.378 ± 0.109	0.880 [0.78, 0.94]	L Parietal - L Parietal
HCP	348	2.479 ± 0.551	46 ± 28 [59.839]	0.420 ± 0.115	0.933 [0.88, 0.97]	R Frontal - R Parietal
HCP	349	3.234 ± 1.178	81 ± 50 [61.093]	0.439 ± 0.127	0.923 [0.86, 0.96]	L Frontal - L Frontal
HCP	350	3.044 ± 0.997	30 ± 18 [58.631]	0.368 ± 0.101	0.889 [0.81, 0.95]	L Frontal - L Frontal
HCP	351	2.536 ± 0.690	43 ± 29 [67.924]	0.410 ± 0.137	0.822 [0.71, 0.91]	L Frontal - L Frontal
HCP	352	2.557 ± 1.057	98 ± 40 [40.553]	0.454 ± 0.083	0.886 [0.78, 0.95]	R Frontal - R Frontal
HCP	353	2.415 ± 0.670	48 ± 33 [67.432]	0.477 ± 0.114	0.910 [0.83, 0.96]	R Frontal - R Frontal
HCP	354	4.535 ± 0.885	32 ± 15 [47.928]	0.229 ± 0.076	0.897 [0.81, 0.95]	L Parietal - L Parietal
HCP	355	2.645 ± 0.956	62 ± 30 [47.514]	0.479 ± 0.102	0.873 [0.75, 0.94]	R Parietal - R Parietal
HCP	356	3.418 ± 1.330	66 ± 40 [60.336]	0.352 ± 0.124	0.923 [0.85, 0.97]	R Frontal - R Frontal
HCP	357	2.880 ± 1.215	184 ± 61 [32.998]	0.511 ± 0.108	0.917 [0.84, 0.96]	L Frontal - L Frontal
HCP	358	4.601 ± 1.978	83 ± 50 [60.447]	0.346 ± 0.101	0.918 [0.85, 0.96]	L Frontal - L Frontal
HCP	359	2.773 ± 0.855	450 ± 155 [34.446]	0.646 ± 0.059	0.749 [0.54, 0.88]	R Temporal - R Cingulate
HCP	360	3.616 ± 0.871	38 ± 27 [69.762]	0.305 ± 0.125	0.823 [0.70, 0.91]	R Frontal - R Frontal
HCP	361	2.542 ± 0.474	91 ± 32 [34.852]	0.496 ± 0.081	0.887 [0.79, 0.95]	R Frontal - R Frontal
HCP	362	3.270 ± 0.709	69 ± 37 [53.530]	0.456 ± 0.114	0.927 [0.86, 0.97]	L Temporal - L Temporal
HCP	363	3.328 ± 1.343	207 ± 107 [52.012]	0.479 ± 0.117	0.889 [0.78, 0.95]	L Parietal - L Parietal
HCP	364	2.567 ± 0.631	80 ± 35 [44.001]	0.519 ± 0.093	0.908 [0.82, 0.96]	R Parietal - R Parietal
HCP	365	2.317 ± 0.766	48 ± 26 [55.226]	0.460 ± 0.135	0.910 [0.85, 0.96]	R Frontal - R Frontal
HCP	366	6.009 ± 3.870	243 ± 167 [68.751]	0.423 ± 0.182	0.633 [0.41, 0.81]	Cerebellum
HCP	367	2.313 ± 0.402	109 ± 46 [42.391]	0.559 ± 0.095	0.920 [0.84, 0.97]	R Parietal - R Parietal
HCP	368	4.429 ± 0.344	43 ± 16 [37.183]	0.577 ± 0.070	0.915 [0.84, 0.96]	L Frontal - L Parietal
HCP	369	3.638 ± 0.626	54 ± 24 [44.305]	0.553 ± 0.073	0.855 [0.75, 0.93]	R Frontal - R Frontal
HCP	370	4.446 ± 2.468	448 ± 200 [44.561]	0.640 ± 0.155	0.710 [0.52, 0.86]	Cerebellum
HCP	371	3.981 ± 2.376	204 ± 126 [61.673]	0.527 ± 0.126	0.905 [0.83, 0.96]	L Frontal - L Frontal
HCP	372	3.125 ± 0.708	86 ± 42 [48.217]	0.488 ± 0.092	0.900 [0.80, 0.96]	L Parietal - L Parietal
HCP	373	2.284 ± 0.552	62 ± 42 [67.610]	0.461 ± 0.118	0.904 [0.82, 0.96]	L Occipital - L Occipital
HCP	374	2.284 ± 0.821	82 ± 35 [42.802]	0.436 ± 0.108	0.901 [0.82, 0.95]	L Frontal - L Frontal
HCP	375	5.843 ± 2.000	97 ± 44 [45.564]	0.387 ± 0.064	0.727 [0.56, 0.86]	L Frontal - L Temporal
HCP	376	2.917 ± 0.919	47 ± 37 [79.717]	0.330 ± 0.121	0.877 [0.77, 0.94]	L Parietal - L Parietal
HCP	377	5.191 ± 2.691	84 ± 44 [52.298]	0.380 ± 0.098	0.697 [0.52, 0.84]	R Frontal - R Frontal
HCP	378	2.654 ± 0.636	78 ± 36 [46.471]	0.504 ± 0.107	0.852 [0.72, 0.93]	L Parietal - L Temporal
HCP	379	3.051 ± 0.882	75 ± 53 [70.625]	0.408 ± 0.080	0.827 [0.72, 0.91]	R Temporal - R Temporal
HCP	380	2.209 ± 0.458	54 ± 15 [27.477]	0.530 ± 0.055	0.926 [0.86, 0.97]	L Frontal - L Frontal
HCP	381	2.676 ± 0.562	30 ± 15 [52.199]	0.354 ± 0.066	0.887 [0.80, 0.95]	L Frontal - L Parietal
HCP	382	1.931 ± 0.722	48 ± 26 [54.552]	0.535 ± 0.121	0.938 [0.88, 0.97]	L Frontal - L Frontal
HCP	383	4.656 ± 1.569	9 ± 4 [50.421]	0.106 ± 0.046	0.630 [0.48, 0.79]	R Frontal - R Frontal
HCP	384	3.175 ± 0.639	38 ± 28 [73.537]	0.398 ± 0.096	0.827 [0.71, 0.92]	R Parietal - R Parietal
HCP	385	2.708 ± 0.719	57 ± 56 [96.770]	0.456 ± 0.167	0.811 [0.67, 0.91]	R Frontal - R Frontal
HCP	386	2.612 ± 0.937	199 ± 107 [54.080]	0.534 ± 0.114	0.929 [0.87, 0.97]	R Frontal - R Frontal
HCP	387	3.452 ± 0.647	39 ± 19 [49.453]	0.357 ± 0.078	0.853 [0.75, 0.93]	L Parietal - L Parietal
HCP	388	3.051 ± 1.223	93 ± 43 [46.602]	0.458 ± 0.124	0.773 [0.61, 0.89]	L Frontal - L Frontal
HCP	389	3.449 ± 0.795	24 ± 17 [70.316]	0.265 ± 0.093	0.809 [0.68, 0.91]	L Parietal - L Parietal
HCP	390	2.373 ± 0.666	29 ± 9 [31.175]	0.438 ± 0.068	0.887 [0.80, 0.95]	L Frontal - L Parietal
HCP	391	2.143 ± 0.605	146 ± 98 [67.046]	0.571 ± 0.132	0.919 [0.84, 0.96]	R Frontal - R Frontal
HCP	392	2.825 ± 0.662	63 ± 41 [65.473]	0.476 ± 0.123	0.885 [0.79, 0.95]	L Frontal - L Frontal
HCP	393	2.047 ± 0.466	64 ± 29 [44.724]	0.578 ± 0.096	0.878 [0.79, 0.94]	R Frontal - R Frontal
HCP	394	2.625 ± 0.737	112 ± 38 [33.891]	0.638 ± 0.065	0.919 [0.84, 0.96]	R Frontal - R Frontal
HCP	395	3.134 ± 0.758	54 ± 26 [47.644]	0.321 ± 0.079	0.848 [0.72, 0.93]	R Occipital - R Occipital
HCP	396	2.367 ± 0.867	72 ± 52 [71.677]	0.465 ± 0.134	0.889 [0.79, 0.95]	L Parietal - L Parietal
HCP	397	3.327 ± 1.656	250 ± 125 [49.847]	0.567 ± 0.113	0.882 [0.77, 0.95]	L Occipital - L Occipital
HCP	398	3.487 ± 0.859	48 ± 28 [58.076]	0.438 ± 0.138	0.906 [0.82, 0.96]	L Frontal - L Frontal
HCP	399	2.750 ± 1.264	63 ± 32 [50.221]	0.410 ± 0.087	0.840 [0.72, 0.92]	L Frontal - L Frontal
HCP	400	4.631 ± 0.862	44 ± 30 [69.451]	0.343 ± 0.116	0.829 [0.71, 0.92]	L Parietal - L Parietal
HCP	401	3.169 ± 0.763	33 ± 16 [49.357]	0.430 ± 0.109	0.887 [0.80, 0.95]	L Frontal - L Frontal
HCP	402	3.253 ± 1.592	68 ± 40 [58.731]	0.400 ± 0.130	0.847 [0.72, 0.93]	L Frontal - L Frontal
HCP	403	3.011 ± 1.510	41 ± 23 [55.304]	0.341 ± 0.105	0.887 [0.79, 0.95]	R Frontal - R Frontal
HCP	404	2.863 ± 0.585	44 ± 38 [85.352]	0.408 ± 0.142	0.881 [0.79, 0.94]	L Parietal - L Parietal
HCP	405	3.913 ± 1.971	97 ± 72 [74.793]	0.406 ± 0.163	0.883 [0.79, 0.95]	R Frontal - R Frontal
HCP	406	3.404 ± 0.720	44 ± 19 [43.149]	0.423 ± 0.108	0.907 [0.84, 0.96]	L Frontal - L Frontal
HCP	407	2.287 ± 0.614	49 ± 22 [44.163]	0.488 ± 0.111	0.926 [0.86, 0.97]	R Frontal - R Frontal
HCP	408	2.291 ± 0.489	68 ± 26 [38.235]	0.522 ± 0.117	0.861 [0.75, 0.94]	L Frontal - L Frontal
HCP	409	2.663 ± 0.993	49 ± 28 [57.209]	0.368 ± 0.142	0.860 [0.75, 0.93]	R Occipital - R Occipital
HCP	410	3.202 ± 0.802	130 ± 56 [43.462]	0.436 ± 0.098	0.897 [0.81, 0.95]	L Frontal - L Frontal
HCP	411	2.865 ± 0.567	55 ± 42 [76.967]	0.388 ± 0.093	0.904 [0.82, 0.96]	L Frontal - L Frontal
HCP	412	4.015 ± 1.061	44 ± 28 [64.946]	0.428 ± 0.090	0.898 [0.82, 0.95]	L Frontal - L Temporal
HCP	413	2.733 ± 0.767	239 ± 115 [48.348]	0.615 ± 0.073	0.946 [0.90, 0.98]	L Occipital - L Occipital
HCP	414	5.849 ± 2.268	141 ± 86 [60.780]	0.370 ± 0.136	0.601 [0.40, 0.79]	Cerebellum
HCP	415	4.182 ± 0.570	55 ± 31 [56.392]	0.446 ± 0.129	0.871 [0.77, 0.94]	R Parietal - R Parietal
HCP	416	2.499 ± 0.733	54 ± 28 [52.208]	0.431 ± 0.108	0.866 [0.75, 0.94]	L Parietal - L Occipital
HCP	417	4.317 ± 0.715	28 ± 15 [54.742]	0.329 ± 0.093	0.859 [0.76, 0.93]	R Parietal - R Parietal
HCP	418	3.295 ± 0.569	52 ± 30 [57.157]	0.489 ± 0.152	0.888 [0.80, 0.95]	R Frontal - R Frontal
HCP	419	2.469 ± 0.683	92 ± 51 [55.191]	0.401 ± 0.103	0.876 [0.77, 0.94]	R Parietal - R Parietal
HCP	420	2.736 ± 0.493	102 ± 50 [48.838]	0.555 ± 0.080	0.942 [0.90, 0.97]	L Parietal - L Parietal
HCP	421	2.465 ± 0.677	43 ± 21 [48.709]	0.421 ± 0.089	0.877 [0.78, 0.94]	R Parietal - R Parietal
HCP	422	2.686 ± 0.531	47 ± 31 [65.464]	0.408 ± 0.131	0.818 [0.69, 0.91]	L Frontal - L Frontal
HCP	423	2.411 ± 0.538	212 ± 103 [48.453]	0.594 ± 0.089	0.869 [0.75, 0.94]	R Frontal - R Cingulate
HCP	424	3.758 ± 0.485	42 ± 23 [54.173]	0.416 ± 0.124	0.856 [0.77, 0.93]	L Frontal - L Frontal
HCP	425	2.762 ± 0.518	143 ± 71 [49.354]	0.552 ± 0.095	0.816 [0.65, 0.92]	L Temporal - L Temporal
HCP	426	2.864 ± 0.425	54 ± 24 [44.495]	0.620 ± 0.108	0.928 [0.87, 0.97]	R Frontal - R Parietal
HCP	427	4.047 ± 0.459	23 ± 10 [41.919]	0.389 ± 0.062	0.812 [0.68, 0.91]	R Parietal - R Temporal
HCP	428	3.084 ± 0.882	15 ± 11 [72.431]	0.250 ± 0.090	0.781 [0.65, 0.89]	L Parietal - L Parietal
HCP	429	2.488 ± 0.804	34 ± 20 [57.929]	0.374 ± 0.133	0.889 [0.81, 0.95]	L Frontal - L Frontal
HCP	430	3.128 ± 0.839	69 ± 50 [72.108]	0.416 ± 0.133	0.878 [0.78, 0.94]	R Frontal - R Frontal
HCP	431	2.919 ± 0.830	35 ± 21 [59.738]	0.310 ± 0.110	0.644 [0.48, 0.80]	L Frontal - L Frontal
HCP	432	3.122 ± 0.740	125 ± 61 [49.183]	0.524 ± 0.104	0.917 [0.85, 0.96]	R Frontal - R Frontal
HCP	433	3.014 ± 1.029	17 ± 12 [72.066]	0.242 ± 0.091	0.838 [0.74, 0.92]	R Parietal - R Parietal
HCP	434	2.799 ± 0.690	62 ± 42 [68.574]	0.346 ± 0.111	0.847 [0.73, 0.93]	R Parietal - R Parietal
HCP	435	3.227 ± 0.859	40 ± 27 [67.430]	0.353 ± 0.095	0.867 [0.77, 0.94]	L Parietal - L Parietal
HCP	436	2.141 ± 0.717	71 ± 33 [47.037]	0.577 ± 0.142	0.713 [0.55, 0.85]	R Frontal - R Frontal
HCP	437	1.673 ± 0.498	55 ± 22 [39.826]	0.606 ± 0.103	0.901 [0.83, 0.95]	L Frontal - L Parietal
HCP	438	2.642 ± 0.843	80 ± 34 [41.788]	0.409 ± 0.106	0.901 [0.81, 0.96]	R Parietal - R Parietal
HCP	439	2.579 ± 0.478	66 ± 58 [87.289]	0.429 ± 0.131	0.854 [0.74, 0.93]	R Frontal - R Frontal
HCP	440	3.223 ± 1.175	87 ± 49 [56.156]	0.397 ± 0.105	0.805 [0.64, 0.91]	R Parietal - R Parietal
HCP	441	2.947 ± 1.172	129 ± 78 [60.691]	0.508 ± 0.159	0.858 [0.73, 0.94]	R Occipital - R Occipital
HCP	442	3.105 ± 0.640	27 ± 24 [86.141]	0.316 ± 0.128	0.850 [0.75, 0.93]	L Frontal - L Frontal
HCP	443	3.137 ± 0.883	23 ± 17 [76.836]	0.292 ± 0.105	0.811 [0.68, 0.91]	L Parietal - L Parietal
HCP	444	2.657 ± 0.473	108 ± 52 [47.760]	0.484 ± 0.088	0.913 [0.83, 0.96]	L Temporal - L Occipital
HCP	445	3.944 ± 1.513	40 ± 34 [85.543]	0.381 ± 0.172	0.627 [0.45, 0.80]	R Frontal - R Frontal
HCP	446	2.792 ± 0.536	34 ± 21 [61.519]	0.314 ± 0.106	0.853 [0.76, 0.93]	R Frontal - R Frontal
HCP	447	3.042 ± 0.694	93 ± 66 [71.762]	0.482 ± 0.091	0.921 [0.86, 0.96]	R Frontal - R Frontal
HCP	448	2.184 ± 0.657	119 ± 78 [65.744]	0.449 ± 0.100	0.898 [0.81, 0.95]	R Frontal - R Frontal
HCP	449	1.977 ± 0.557	35 ± 12 [34.737]	0.489 ± 0.076	0.901 [0.82, 0.95]	L Frontal - L Parietal
HCP	450	4.063 ± 1.956	52 ± 24 [45.798]	0.347 ± 0.085	0.856 [0.75, 0.93]	L Frontal - L Temporal
HCP	451	-	-	-	-	R Parietal - R Parietal
HCP	452	2.503 ± 0.846	35 ± 25 [71.626]	0.342 ± 0.130	0.834 [0.73, 0.92]	L Frontal - L Frontal
HCP	453	2.261 ± 0.666	102 ± 40 [39.100]	0.576 ± 0.141	0.462 [0.26, 0.68]	Cerebellum
HCP	454	3.099 ± 1.468	54 ± 34 [62.708]	0.389 ± 0.150	0.811 [0.68, 0.91]	L Frontal - L Cingulate
HCP	455	2.266 ± 0.686	61 ± 36 [59.310]	0.465 ± 0.154	0.873 [0.78, 0.94]	R Frontal - R Frontal
HCP	456	2.905 ± 0.966	100 ± 66 [66.470]	0.468 ± 0.139	0.837 [0.73, 0.92]	L Frontal - L Cingulate
HCP	457	3.523 ± 1.890	77 ± 69 [89.733]	0.351 ± 0.144	0.711 [0.53, 0.85]	R Parietal - R Parietal
HCP	458	3.031 ± 0.766	32 ± 23 [73.562]	0.341 ± 0.090	0.838 [0.72, 0.92]	L Occipital - L Occipital
HCP	459	3.141 ± 0.846	23 ± 28 [121.787]	0.260 ± 0.101	0.827 [0.72, 0.91]	R Parietal - R Parietal
HCP	460	3.380 ± 0.792	38 ± 26 [67.312]	0.380 ± 0.126	0.824 [0.72, 0.91]	L Frontal - L Frontal
HCP	461	2.298 ± 0.651	135 ± 65 [48.058]	0.636 ± 0.098	0.650 [0.46, 0.82]	Cerebellum
HCP	462	3.524 ± 0.775	21 ± 17 [79.819]	0.303 ± 0.136	0.882 [0.79, 0.94]	L Frontal - L Frontal
HCP	463	3.562 ± 1.164	106 ± 46 [43.675]	0.441 ± 0.123	0.887 [0.79, 0.95]	L Frontal - L Frontal
HCP	464	3.176 ± 0.783	83 ± 53 [63.512]	0.459 ± 0.124	0.916 [0.84, 0.96]	L Frontal - L Frontal
HCP	465	2.758 ± 1.169	41 ± 24 [58.349]	0.406 ± 0.139	0.911 [0.84, 0.96]	L Frontal - L Frontal
HCP	466	2.950 ± 1.407	192 ± 81 [42.318]	0.630 ± 0.109	0.663 [0.47, 0.82]	R Frontal - R Frontal
HCP	467	3.547 ± 1.010	20 ± 17 [84.096]	0.279 ± 0.104	0.788 [0.66, 0.89]	L Parietal - L Parietal
HCP	468	3.167 ± 0.851	184 ± 99 [53.879]	0.607 ± 0.100	0.925 [0.86, 0.97]	R Frontal - R Cingulate
HCP	469	2.592 ± 0.777	60 ± 36 [59.998]	0.422 ± 0.117	0.839 [0.71, 0.92]	L Parietal - L Occipital
HCP	470	3.244 ± 0.712	12 ± 10 [77.819]	0.227 ± 0.108	0.808 [0.69, 0.90]	L Frontal - L Frontal
HCP	471	2.400 ± 0.823	54 ± 31 [56.481]	0.431 ± 0.103	0.684 [0.51, 0.83]	R Frontal - R Frontal
HCP	472	3.010 ± 1.098	40 ± 24 [59.169]	0.350 ± 0.110	0.781 [0.65, 0.89]	L Frontal - L Frontal
HCP	473	4.315 ± 0.848	23 ± 21 [90.868]	0.278 ± 0.111	0.846 [0.75, 0.92]	L Frontal - L Frontal
HCP	474	2.721 ± 0.650	56 ± 29 [50.577]	0.432 ± 0.069	0.883 [0.80, 0.94]	R Parietal - R Parietal
HCP	475	3.465 ± 0.953	18 ± 9 [49.893]	0.236 ± 0.062	0.891 [0.82, 0.95]	R Parietal - R Parietal
HCP	476	2.709 ± 1.434	64 ± 34 [52.574]	0.503 ± 0.099	0.893 [0.79, 0.95]	R Occipital - R Occipital
HCP	477	2.657 ± 1.408	139 ± 74 [53.322]	0.506 ± 0.121	0.902 [0.82, 0.96]	L Occipital - L Occipital
HCP	478	-	-	-	-	L Frontal - L Frontal
HCP	479	4.432 ± 0.818	18 ± 18 [99.779]	0.269 ± 0.115	0.822 [0.71, 0.91]	L Parietal - L Parietal
HCP	480	3.291 ± 1.187	21 ± 17 [81.897]	0.305 ± 0.081	0.836 [0.73, 0.92]	L Frontal - L Temporal
HCP	481	2.899 ± 1.059	10 ± 9 [89.192]	0.204 ± 0.131	0.682 [0.53, 0.83]	R Frontal - R Frontal
HCP	482	2.947 ± 0.704	24 ± 18 [73.659]	0.283 ± 0.123	0.810 [0.70, 0.90]	L Frontal - L Frontal
HCP	483	4.158 ± 1.176	23 ± 23 [99.440]	0.217 ± 0.107	0.806 [0.69, 0.90]	L Frontal - L Frontal
HCP	484	2.906 ± 0.941	40 ± 22 [53.931]	0.340 ± 0.106	0.872 [0.78, 0.94]	L Parietal - L Parietal
HCP	485	2.465 ± 0.857	17 ± 12 [69.496]	0.297 ± 0.121	0.825 [0.70, 0.91]	L Frontal - L Frontal
HCP	486	3.988 ± 1.619	27 ± 20 [74.090]	0.281 ± 0.108	0.630 [0.45, 0.80]	R Parietal - R Parietal
HCP	487	2.874 ± 1.579	585 ± 273 [46.697]	0.783 ± 0.155	0.721 [0.53, 0.86]	Cerebellum
HCP	488	-	-	-	-	L Frontal - L Frontal
HCP	489	4.050 ± 1.723	70 ± 33 [47.298]	0.396 ± 0.129	0.917 [0.85, 0.96]	L Occipital - L Occipital
HCP	490	2.661 ± 0.775	122 ± 54 [44.201]	0.618 ± 0.104	0.711 [0.53, 0.85]	Cerebellum
HCP	491	2.375 ± 0.699	24 ± 14 [56.285]	0.458 ± 0.136	0.907 [0.83, 0.96]	L Frontal - L Frontal
HCP	492	3.526 ± 1.641	156 ± 114 [72.735]	0.556 ± 0.163	0.893 [0.81, 0.95]	L Frontal - L Cingulate
HCP	493	3.055 ± 0.942	81 ± 52 [63.865]	0.399 ± 0.122	0.872 [0.78, 0.94]	L Parietal - L Parietal
HCP	494	2.502 ± 0.792	131 ± 56 [42.971]	0.560 ± 0.098	0.587 [0.39, 0.77]	L Frontal - L Frontal
HCP	495	-	-	-	-	R Frontal - R Parietal
HCP	496	3.005 ± 1.284	54 ± 35 [65.653]	0.345 ± 0.142	0.834 [0.73, 0.92]	R Frontal - R Frontal
HCP	497	-	-	-	-	R Frontal - R Frontal
HCP	498	3.416 ± 1.730	25 ± 14 [57.042]	0.229 ± 0.114	0.626 [0.45, 0.80]	R Frontal - R Frontal
HCP	499	-	-	-	-	L Occipital - L Occipital
MyConnectome QB	0	2.742 ± 0.580	143 ± 57 [39.543]	0.804 ± 0.053	0.987 [0.98, 0.99]	R Frontal - R Parietal
MyConnectome QB	1	2.858 ± 0.569	121 ± 40 [32.681]	0.792 ± 0.049	0.986 [0.98, 0.99]	L Frontal - L Frontal
MyConnectome QB	2	2.158 ± 0.365	146 ± 46 [31.292]	0.804 ± 0.049	0.978 [0.96, 0.99]	L Frontal - L Frontal
MyConnectome QB	3	1.737 ± 0.672	153 ± 54 [35.678]	0.722 ± 0.107	0.985 [0.97, 0.99]	R Frontal - R Temporal
MyConnectome QB	4	1.849 ± 0.441	190 ± 73 [38.669]	0.854 ± 0.055	0.987 [0.98, 0.99]	R Frontal - R Frontal
MyConnectome QB	5	2.539 ± 0.413	125 ± 42 [33.777]	0.775 ± 0.069	0.982 [0.97, 0.99]	L Occipital - L Occipital
MyConnectome QB	6	2.306 ± 0.372	137 ± 47 [34.497]	0.799 ± 0.060	0.980 [0.96, 0.99]	R Frontal - R Frontal
MyConnectome QB	7	4.760 ± 0.418	70 ± 27 [37.785]	0.637 ± 0.095	0.964 [0.93, 0.98]	L Parietal - L Parietal
MyConnectome QB	8	2.685 ± 0.269	149 ± 47 [31.495]	0.808 ± 0.063	0.983 [0.97, 0.99]	L Frontal - L Frontal
MyConnectome QB	9	1.879 ± 0.219	147 ± 65 [44.044]	0.809 ± 0.081	0.985 [0.97, 0.99]	R Frontal - R Frontal
MyConnectome QB	10	2.674 ± 0.420	130 ± 47 [36.573]	0.787 ± 0.056	0.977 [0.96, 0.99]	L Parietal - L Parietal
MyConnectome QB	11	2.454 ± 0.324	190 ± 53 [27.912]	0.829 ± 0.039	0.993 [0.99, 1.00]	L Parietal - L Parietal
MyConnectome QB	12	3.132 ± 0.518	294 ± 119 [40.528]	0.870 ± 0.053	0.989 [0.98, 1.00]	R Occipital - R Occipital
MyConnectome QB	13	2.015 ± 0.300	129 ± 57 [43.882]	0.778 ± 0.067	0.983 [0.97, 0.99]	L Frontal - L Frontal
MyConnectome QB	14	2.221 ± 0.579	63 ± 19 [29.458]	0.622 ± 0.059	0.971 [0.95, 0.99]	L Frontal - L Frontal
MyConnectome QB	15	2.170 ± 0.443	103 ± 30 [28.993]	0.791 ± 0.059	0.981 [0.96, 0.99]	R Frontal - R Frontal
MyConnectome QB	16	2.427 ± 0.626	162 ± 69 [42.631]	0.758 ± 0.083	0.980 [0.96, 0.99]	R Parietal - R Parietal
MyConnectome QB	17	2.180 ± 0.496	177 ± 49 [27.710]	0.796 ± 0.053	0.990 [0.98, 1.00]	L Parietal - L Parietal
MyConnectome QB	18	2.140 ± 0.295	187 ± 84 [45.090]	0.839 ± 0.067	0.983 [0.97, 0.99]	L Frontal - L Parietal
MyConnectome QB	19	1.811 ± 0.306	212 ± 42 [19.737]	0.839 ± 0.036	0.984 [0.97, 0.99]	R Temporal - R Temporal
MyConnectome QB	20	1.931 ± 0.407	86 ± 24 [28.366]	0.751 ± 0.047	0.973 [0.95, 0.99]	L Frontal - L Frontal
MyConnectome QB	21	2.290 ± 0.429	162 ± 51 [31.398]	0.795 ± 0.073	0.986 [0.97, 0.99]	R Frontal - R Frontal
MyConnectome QB	22	3.600 ± 0.382	105 ± 34 [31.956]	0.770 ± 0.061	0.979 [0.96, 0.99]	R Parietal - R Parietal
MyConnectome QB	23	2.820 ± 0.682	153 ± 55 [36.039]	0.818 ± 0.062	0.988 [0.98, 0.99]	L Temporal - L Temporal
MyConnectome QB	24	2.462 ± 0.344	57 ± 19 [32.863]	0.631 ± 0.065	0.969 [0.94, 0.99]	R Frontal - R Frontal
MyConnectome QB	25	1.961 ± 0.416	76 ± 24 [30.979]	0.634 ± 0.068	0.976 [0.96, 0.99]	L Frontal - L Frontal
MyConnectome QB	26	1.594 ± 0.252	91 ± 25 [26.993]	0.763 ± 0.054	0.984 [0.97, 0.99]	L Frontal - L Frontal
MyConnectome QB	27	2.926 ± 0.527	132 ± 33 [24.663]	0.818 ± 0.046	0.989 [0.98, 1.00]	L Frontal - L Frontal
MyConnectome QB	28	2.804 ± 0.268	158 ± 48 [30.490]	0.851 ± 0.050	0.987 [0.98, 0.99]	L Parietal - L Parietal
MyConnectome QB	29	4.236 ± 0.563	101 ± 41 [40.584]	0.717 ± 0.076	0.978 [0.96, 0.99]	R Parietal - R Temporal
MyConnectome QB	30	2.075 ± 0.365	107 ± 35 [32.365]	0.761 ± 0.072	0.986 [0.97, 0.99]	R Occipital - R Occipital
MyConnectome QB	31	1.641 ± 0.284	160 ± 22 [13.952]	0.852 ± 0.022	0.994 [0.99, 1.00]	R Temporal - R Temporal
MyConnectome QB	32	1.812 ± 0.300	82 ± 25 [30.825]	0.691 ± 0.078	0.977 [0.96, 0.99]	L Frontal - L Parietal
MyConnectome QB	33	2.570 ± 0.400	102 ± 39 [38.226]	0.728 ± 0.082	0.985 [0.97, 0.99]	R Occipital - R Occipital
MyConnectome QB	34	3.307 ± 1.289	121 ± 67 [55.206]	0.526 ± 0.126	0.597 [0.36, 0.79]	R Temporal - R Temporal
MyConnectome QB	35	1.682 ± 0.447	176 ± 45 [25.294]	0.779 ± 0.061	0.982 [0.97, 0.99]	L Occipital - L Occipital
MyConnectome QB	36	4.206 ± 0.549	70 ± 21 [30.403]	0.656 ± 0.067	0.974 [0.95, 0.99]	L Frontal - L Frontal
MyConnectome QB	37	1.721 ± 0.384	131 ± 45 [34.718]	0.776 ± 0.064	0.985 [0.97, 0.99]	L Frontal - L Frontal
MyConnectome QB	38	2.966 ± 0.203	318 ± 145 [45.538]	0.879 ± 0.063	0.987 [0.98, 0.99]	R Frontal - R Frontal
MyConnectome QB	39	2.560 ± 0.397	615 ± 131 [21.257]	0.839 ± 0.046	0.954 [0.91, 0.98]	L Parietal - L Parietal
MyConnectome QB	40	2.844 ± 0.694	76 ± 30 [39.456]	0.574 ± 0.085	0.931 [0.88, 0.97]	L Parietal - L Parietal
MyConnectome QB	41	1.630 ± 0.436	118 ± 48 [40.647]	0.780 ± 0.079	0.981 [0.96, 0.99]	R Parietal - R Parietal
MyConnectome QB	42	2.549 ± 0.569	86 ± 34 [39.670]	0.691 ± 0.098	0.974 [0.95, 0.99]	Cerebellum
MyConnectome QB	43	3.009 ± 0.237	135 ± 54 [40.237]	0.808 ± 0.070	0.987 [0.98, 0.99]	L Parietal - L Occipital
MyConnectome QB	44	2.279 ± 0.729	209 ± 60 [28.580]	0.745 ± 0.056	0.971 [0.95, 0.99]	L Frontal - L Frontal
MyConnectome QB	45	3.703 ± 0.347	132 ± 43 [32.292]	0.825 ± 0.056	0.986 [0.97, 0.99]	L Occipital - L Occipital
MyConnectome QB	46	2.273 ± 0.326	140 ± 57 [40.951]	0.775 ± 0.084	0.988 [0.98, 0.99]	R Frontal - R Frontal
MyConnectome QB	47	2.500 ± 0.516	102 ± 31 [30.804]	0.769 ± 0.062	0.981 [0.97, 0.99]	R Temporal - R Temporal
MyConnectome QB	48	1.342 ± 0.246	145 ± 66 [45.512]	0.768 ± 0.102	0.979 [0.96, 0.99]	R Frontal - R Frontal
MyConnectome QB	49	3.151 ± 0.554	171 ± 67 [39.266]	0.842 ± 0.061	0.985 [0.97, 0.99]	L Frontal - L Parietal
MyConnectome QB	50	2.209 ± 0.653	224 ± 101 [44.967]	0.794 ± 0.092	0.989 [0.98, 1.00]	L Temporal - L Temporal
MyConnectome QB	51	2.502 ± 0.687	191 ± 63 [33.036]	0.839 ± 0.061	0.977 [0.95, 0.99]	L Frontal - L Frontal
MyConnectome QB	52	4.442 ± 0.361	62 ± 17 [27.633]	0.677 ± 0.056	0.982 [0.97, 0.99]	L Temporal - L Temporal
MyConnectome QB	53	2.378 ± 0.390	164 ± 43 [26.120]	0.845 ± 0.038	0.984 [0.97, 0.99]	L Frontal - L Parietal
MyConnectome QB	54	3.086 ± 0.498	205 ± 79 [38.568]	0.797 ± 0.093	0.980 [0.96, 0.99]	R Temporal - R Temporal
MyConnectome QB	55	4.584 ± 0.302	53 ± 19 [36.507]	0.672 ± 0.083	0.965 [0.94, 0.98]	R Frontal - R Frontal
MyConnectome QB	56	2.814 ± 0.386	134 ± 46 [34.181]	0.766 ± 0.072	0.979 [0.96, 0.99]	L Parietal - L Temporal
MyConnectome QB	57	1.425 ± 0.465	124 ± 38 [30.216]	0.798 ± 0.051	0.983 [0.97, 0.99]	L Frontal - L Frontal
MyConnectome QB	58	1.926 ± 0.100	139 ± 37 [26.689]	0.843 ± 0.040	0.991 [0.98, 1.00]	R Parietal - R Parietal
MyConnectome QB	59	3.031 ± 1.271	188 ± 82 [43.478]	0.734 ± 0.092	0.969 [0.94, 0.99]	L Parietal - L Parietal
MyConnectome QB	60	2.064 ± 0.374	89 ± 33 [37.381]	0.734 ± 0.081	0.971 [0.95, 0.99]	R Temporal - R Temporal
MyConnectome QB	61	2.524 ± 0.998	267 ± 82 [30.835]	0.828 ± 0.080	0.985 [0.97, 0.99]	R Parietal - R Parietal
MyConnectome QB	62	2.601 ± 0.306	68 ± 24 [34.972]	0.708 ± 0.079	0.970 [0.94, 0.99]	L Frontal - L Frontal
MyConnectome QB	63	3.583 ± 0.432	112 ± 41 [37.109]	0.720 ± 0.091	0.969 [0.94, 0.99]	R Frontal - R Frontal
MyConnectome QB	64	2.895 ± 0.633	211 ± 77 [36.450]	0.629 ± 0.058	0.957 [0.91, 0.98]	L Frontal - L Parietal
MyConnectome QB	65	3.199 ± 0.773	147 ± 51 [34.986]	0.806 ± 0.076	0.986 [0.97, 0.99]	L Frontal - L Frontal
MyConnectome QB	66	2.366 ± 0.558	85 ± 31 [36.854]	0.687 ± 0.095	0.977 [0.96, 0.99]	L Parietal - L Parietal
MyConnectome QB	67	2.559 ± 0.297	241 ± 53 [21.961]	0.840 ± 0.034	0.990 [0.98, 1.00]	L Parietal - L Parietal
MyConnectome QB	68	1.892 ± 0.257	121 ± 52 [43.427]	0.700 ± 0.095	0.970 [0.95, 0.99]	L Frontal - L Frontal
MyConnectome QB	69	2.793 ± 0.608	112 ± 36 [32.074]	0.632 ± 0.060	0.962 [0.93, 0.98]	L Parietal - L Parietal
MyConnectome QB	70	2.326 ± 0.459	110 ± 37 [33.568]	0.789 ± 0.067	0.979 [0.96, 0.99]	R Parietal - R Parietal
MyConnectome QB	71	2.110 ± 0.632	78 ± 28 [35.922]	0.594 ± 0.097	0.983 [0.97, 0.99]	L Temporal - L Temporal
MyConnectome QB	72	1.855 ± 0.230	108 ± 48 [44.521]	0.769 ± 0.075	0.965 [0.93, 0.98]	L Parietal - L Parietal
MyConnectome QB	73	2.562 ± 0.519	229 ± 88 [38.244]	0.837 ± 0.079	0.975 [0.95, 0.99]	L Parietal - L Parietal
MyConnectome QB	74	1.718 ± 0.443	102 ± 32 [31.413]	0.712 ± 0.082	0.983 [0.97, 0.99]	R Occipital - R Occipital
MyConnectome QB	75	2.541 ± 0.927	187 ± 47 [24.881]	0.707 ± 0.049	0.929 [0.87, 0.97]	R Parietal - R Parietal
MyConnectome QB	76	2.078 ± 0.399	137 ± 24 [17.625]	0.805 ± 0.028	0.979 [0.96, 0.99]	R Frontal - R Parietal
MyConnectome QB	77	1.674 ± 0.269	162 ± 51 [31.392]	0.825 ± 0.071	0.991 [0.98, 1.00]	L Parietal - L Parietal
MyConnectome QB	78	2.646 ± 0.385	150 ± 48 [32.017]	0.731 ± 0.073	0.940 [0.88, 0.97]	R Frontal - R Frontal
MyConnectome QB	79	2.973 ± 0.801	245 ± 101 [41.439]	0.800 ± 0.102	0.978 [0.96, 0.99]	L Frontal - L Frontal
MyConnectome QB	80	2.142 ± 0.410	74 ± 23 [30.856]	0.619 ± 0.081	0.974 [0.95, 0.99]	R Frontal - R Parietal
MyConnectome QB	81	2.369 ± 0.451	94 ± 31 [33.508]	0.677 ± 0.075	0.984 [0.97, 0.99]	L Parietal - L Parietal
MyConnectome QB	82	2.985 ± 0.391	114 ± 29 [25.246]	0.745 ± 0.046	0.977 [0.96, 0.99]	L Frontal - L Parietal
MyConnectome QB	83	1.718 ± 0.416	140 ± 35 [25.332]	0.807 ± 0.074	0.990 [0.98, 1.00]	L Frontal - L Frontal
MyConnectome QB	84	2.358 ± 0.663	137 ± 49 [35.476]	0.764 ± 0.086	0.980 [0.96, 0.99]	R Frontal - R Frontal
MyConnectome QB	85	5.710 ± 0.760	73 ± 22 [29.569]	0.517 ± 0.043	0.947 [0.91, 0.98]	L Parietal - L Cingulate
MyConnectome QB	86	1.771 ± 0.326	69 ± 35 [50.668]	0.729 ± 0.083	0.976 [0.96, 0.99]	L Parietal - L Parietal
MyConnectome QB	87	3.240 ± 1.387	264 ± 102 [38.712]	0.707 ± 0.086	0.940 [0.88, 0.97]	L Frontal - L Frontal
MyConnectome QB	88	1.582 ± 0.417	139 ± 46 [32.797]	0.735 ± 0.093	0.978 [0.96, 0.99]	R Parietal - R Parietal
MyConnectome QB	89	2.340 ± 0.384	57 ± 25 [43.568]	0.625 ± 0.083	0.956 [0.92, 0.98]	R Parietal - R Parietal
MyConnectome QB	90	2.164 ± 0.518	79 ± 30 [38.799]	0.717 ± 0.084	0.969 [0.94, 0.99]	R Frontal - R Frontal
MyConnectome QB	91	2.088 ± 0.391	184 ± 45 [24.237]	0.820 ± 0.064	0.986 [0.98, 0.99]	L Frontal - L Frontal
MyConnectome QB	92	1.723 ± 0.322	127 ± 55 [42.896]	0.773 ± 0.090	0.978 [0.96, 0.99]	L Frontal - L Frontal
MyConnectome QB	93	1.467 ± 0.335	99 ± 37 [37.523]	0.743 ± 0.083	0.972 [0.95, 0.99]	R Parietal - R Parietal
MyConnectome QB	94	1.722 ± 0.572	121 ± 52 [43.022]	0.714 ± 0.096	0.956 [0.92, 0.98]	L Parietal - L Parietal
MyConnectome QB	95	1.883 ± 0.364	113 ± 39 [34.411]	0.744 ± 0.072	0.987 [0.98, 0.99]	R Parietal - R Temporal
MyConnectome QB	96	1.893 ± 0.481	93 ± 36 [38.553]	0.652 ± 0.082	0.981 [0.97, 0.99]	R Parietal - R Parietal
MyConnectome QB	97	1.899 ± 0.378	127 ± 55 [43.711]	0.800 ± 0.074	0.986 [0.97, 0.99]	R Frontal - R Frontal
MyConnectome QB	98	1.455 ± 0.873	136 ± 55 [40.307]	0.761 ± 0.116	0.982 [0.97, 0.99]	L Temporal - L Temporal
MyConnectome QB	99	2.860 ± 0.556	26 ± 7 [28.703]	0.381 ± 0.059	0.955 [0.92, 0.98]	L Parietal - L Parietal
MyConnectome QB	100	2.496 ± 0.926	426 ± 100 [23.589]	0.773 ± 0.050	0.986 [0.97, 0.99]	L Temporal - L Temporal
MyConnectome QB	101	2.518 ± 0.413	87 ± 20 [22.420]	0.676 ± 0.048	0.935 [0.88, 0.97]	L Temporal - L Temporal
MyConnectome QB	102	3.253 ± 0.581	91 ± 22 [24.013]	0.705 ± 0.037	0.973 [0.95, 0.99]	R Frontal - R Frontal
MyConnectome QB	103	1.601 ± 0.445	150 ± 38 [25.576]	0.776 ± 0.066	0.992 [0.99, 1.00]	R Frontal - R Frontal
MyConnectome QB	104	1.937 ± 0.403	36 ± 13 [36.951]	0.605 ± 0.106	0.967 [0.94, 0.98]	L Parietal - L Parietal
MyConnectome QB	105	1.386 ± 0.663	47 ± 18 [37.569]	0.582 ± 0.098	0.958 [0.92, 0.98]	L Frontal - L Frontal
MyConnectome QB	106	2.194 ± 0.715	79 ± 33 [41.380]	0.652 ± 0.112	0.978 [0.96, 0.99]	L Frontal - L Parietal
MyConnectome QB	107	2.212 ± 0.855	143 ± 36 [24.959]	0.730 ± 0.072	0.961 [0.93, 0.98]	R Frontal - R Frontal
MyConnectome QB	108	2.668 ± 1.190	141 ± 64 [45.058]	0.625 ± 0.109	0.980 [0.96, 0.99]	R Frontal - R Frontal
MyConnectome QB	109	4.008 ± 0.315	66 ± 17 [26.478]	0.609 ± 0.051	0.974 [0.95, 0.99]	R Parietal - R Parietal
MyConnectome QB	110	1.836 ± 0.299	190 ± 58 [30.255]	0.822 ± 0.076	0.984 [0.97, 0.99]	R Frontal - R Frontal
MyConnectome QB	111	2.185 ± 1.004	210 ± 71 [33.716]	0.752 ± 0.088	0.987 [0.97, 0.99]	L Parietal - L Parietal
MyConnectome QB	112	2.250 ± 0.276	111 ± 15 [13.481]	0.746 ± 0.022	0.990 [0.98, 1.00]	R Temporal - R Temporal
MyConnectome QB	113	2.273 ± 0.413	47 ± 17 [35.393]	0.622 ± 0.081	0.953 [0.91, 0.98]	R Frontal - R Frontal
MyConnectome QB	114	2.038 ± 0.688	336 ± 96 [28.464]	0.877 ± 0.053	0.993 [0.99, 1.00]	L Frontal - L Parietal
MyConnectome QB	115	4.404 ± 0.670	77 ± 23 [29.627]	0.644 ± 0.069	0.953 [0.91, 0.98]	R Parietal - R Parietal
MyConnectome QB	116	2.756 ± 1.317	56 ± 21 [38.324]	0.389 ± 0.096	0.895 [0.81, 0.95]	R Frontal - R Parietal
MyConnectome QB	117	2.221 ± 0.384	100 ± 38 [38.092]	0.753 ± 0.089	0.970 [0.94, 0.99]	L Frontal - L Frontal
MyConnectome QB	118	2.761 ± 0.290	62 ± 18 [29.605]	0.610 ± 0.064	0.962 [0.93, 0.98]	L Frontal - L Frontal
MyConnectome QB	119	1.895 ± 0.763	246 ± 81 [32.811]	0.801 ± 0.110	0.990 [0.98, 1.00]	L Frontal - L Frontal
MyConnectome QB	120	2.344 ± 0.249	225 ± 63 [28.146]	0.881 ± 0.041	0.993 [0.99, 1.00]	L Parietal - L Parietal
MyConnectome QB	121	1.979 ± 0.394	74 ± 25 [33.505]	0.623 ± 0.070	0.982 [0.97, 0.99]	L Frontal - L Frontal
MyConnectome QB	122	2.058 ± 0.327	18 ± 7 [39.230]	0.397 ± 0.078	0.948 [0.91, 0.98]	R Parietal - R Parietal
MyConnectome QB	123	2.683 ± 0.592	98 ± 33 [34.028]	0.645 ± 0.084	0.935 [0.87, 0.97]	L Parietal - L Occipital
MyConnectome QB	124	2.222 ± 0.691	43 ± 17 [40.746]	0.554 ± 0.089	0.955 [0.92, 0.98]	L Parietal - L Parietal
MyConnectome QB	125	1.997 ± 0.440	166 ± 41 [24.619]	0.760 ± 0.082	0.986 [0.97, 0.99]	R Temporal - R Temporal
MyConnectome QB	126	2.091 ± 0.602	120 ± 45 [37.330]	0.651 ± 0.083	0.948 [0.91, 0.98]	R Occipital - R Occipital
MyConnectome QB	127	2.898 ± 0.495	108 ± 37 [34.762]	0.658 ± 0.054	0.963 [0.93, 0.98]	R Parietal - R Parietal
MyConnectome QB	128	2.065 ± 0.562	33 ± 14 [42.843]	0.510 ± 0.092	0.945 [0.90, 0.97]	L Parietal - L Parietal
MyConnectome QB	129	3.172 ± 0.604	63 ± 28 [44.473]	0.562 ± 0.106	0.901 [0.83, 0.95]	R Frontal - R Frontal
MyConnectome QB	130	4.217 ± 1.045	19 ± 4 [21.657]	0.308 ± 0.041	0.957 [0.93, 0.98]	R Frontal - R Parietal
MyConnectome QB	131	2.304 ± 0.704	42 ± 12 [29.261]	0.587 ± 0.077	0.965 [0.94, 0.98]	L Parietal - L Temporal
MyConnectome QB	132	3.478 ± 0.474	94 ± 34 [36.073]	0.705 ± 0.073	0.950 [0.90, 0.98]	L Frontal - L Frontal
MyConnectome QB	133	2.273 ± 0.440	107 ± 46 [43.384]	0.732 ± 0.116	0.970 [0.94, 0.99]	L Temporal - L Temporal
MyConnectome QB	134	2.114 ± 0.554	154 ± 59 [38.562]	0.784 ± 0.100	0.980 [0.96, 0.99]	R Parietal - R Parietal
MyConnectome QB	135	2.349 ± 0.533	199 ± 90 [45.312]	0.785 ± 0.117	0.987 [0.97, 0.99]	R Frontal - R Frontal
MyConnectome QB	136	2.047 ± 0.546	66 ± 29 [42.972]	0.663 ± 0.095	0.981 [0.96, 0.99]	L Frontal - L Parietal
MyConnectome QB	137	2.255 ± 0.715	71 ± 26 [37.127]	0.595 ± 0.107	0.971 [0.95, 0.99]	R Frontal - R Frontal
MyConnectome QB	138	1.921 ± 0.317	75 ± 25 [33.569]	0.701 ± 0.075	0.983 [0.97, 0.99]	R Frontal - R Frontal
MyConnectome QB	139	2.695 ± 0.551	59 ± 20 [34.029]	0.689 ± 0.074	0.977 [0.96, 0.99]	L Occipital - L Occipital
MyConnectome QB	140	2.554 ± 0.836	60 ± 15 [25.194]	0.593 ± 0.088	0.977 [0.96, 0.99]	R Parietal - R Parietal
MyConnectome QB	141	1.657 ± 0.594	93 ± 20 [21.590]	0.672 ± 0.065	0.973 [0.95, 0.99]	L Frontal - L Frontal
MyConnectome QB	142	2.617 ± 0.647	140 ± 40 [28.575]	0.786 ± 0.056	0.984 [0.97, 0.99]	L Parietal - L Parietal
MyConnectome QB	143	2.443 ± 0.466	121 ± 54 [44.399]	0.686 ± 0.124	0.974 [0.95, 0.99]	R Frontal - R Frontal
MyConnectome QB	144	2.718 ± 0.405	87 ± 26 [29.780]	0.670 ± 0.086	0.967 [0.94, 0.98]	R Frontal - R Frontal
MyConnectome QB	145	1.839 ± 0.287	67 ± 19 [27.466]	0.654 ± 0.040	0.948 [0.90, 0.98]	Cerebellum
MyConnectome QB	146	2.176 ± 0.517	161 ± 42 [26.317]	0.845 ± 0.065	0.981 [0.97, 0.99]	L Frontal - L Frontal
MyConnectome QB	147	1.855 ± 0.487	88 ± 26 [29.400]	0.718 ± 0.097	0.979 [0.96, 0.99]	L Frontal - L Frontal
MyConnectome QB	148	1.410 ± 0.673	65 ± 25 [37.926]	0.681 ± 0.105	0.961 [0.93, 0.98]	L Frontal - L Frontal
MyConnectome QB	149	2.497 ± 1.074	130 ± 61 [46.921]	0.657 ± 0.157	0.965 [0.93, 0.98]	L Parietal - L Parietal
MyConnectome QB	150	1.775 ± 0.643	79 ± 28 [35.859]	0.699 ± 0.096	0.976 [0.95, 0.99]	R Parietal - R Parietal
MyConnectome QB	151	2.301 ± 1.023	257 ± 86 [33.581]	0.837 ± 0.087	0.991 [0.98, 1.00]	R Parietal - R Parietal
MyConnectome QB	152	3.788 ± 0.671	41 ± 15 [37.514]	0.461 ± 0.084	0.896 [0.82, 0.95]	L Frontal - L Frontal
MyConnectome QB	153	3.215 ± 0.751	85 ± 30 [35.463]	0.559 ± 0.081	0.947 [0.91, 0.98]	R Frontal - R Frontal
MyConnectome QB	154	1.517 ± 0.603	166 ± 50 [30.139]	0.747 ± 0.073	0.991 [0.98, 1.00]	R Frontal - R Frontal
MyConnectome QB	155	2.066 ± 0.764	94 ± 37 [39.680]	0.598 ± 0.112	0.973 [0.95, 0.99]	R Frontal - R Frontal
MyConnectome QB	156	2.767 ± 0.588	44 ± 20 [45.627]	0.528 ± 0.117	0.940 [0.89, 0.97]	R Frontal - R Frontal
MyConnectome QB	157	2.425 ± 0.666	132 ± 48 [36.490]	0.820 ± 0.072	0.985 [0.97, 0.99]	R Frontal - R Frontal
MyConnectome QB	158	1.993 ± 0.570	145 ± 45 [31.229]	0.766 ± 0.088	0.988 [0.98, 0.99]	L Frontal - L Parietal
MyConnectome QB	159	4.570 ± 0.899	15 ± 7 [46.683]	0.293 ± 0.082	0.944 [0.90, 0.97]	L Frontal - L Frontal
MyConnectome QB	160	1.887 ± 0.871	80 ± 30 [37.228]	0.663 ± 0.121	0.976 [0.96, 0.99]	L Frontal - L Frontal
MyConnectome QB	161	2.944 ± 0.392	60 ± 14 [23.411]	0.652 ± 0.049	0.948 [0.90, 0.98]	L Frontal - L Frontal
MyConnectome QB	162	2.153 ± 0.522	71 ± 29 [40.722]	0.566 ± 0.145	0.976 [0.96, 0.99]	L Frontal - L Frontal
MyConnectome QB	163	1.914 ± 0.536	79 ± 22 [27.542]	0.622 ± 0.050	0.970 [0.94, 0.99]	L Frontal - L Frontal
MyConnectome QB	164	2.258 ± 0.536	104 ± 29 [28.452]	0.774 ± 0.053	0.983 [0.97, 0.99]	L Frontal - L Frontal
MyConnectome QB	165	2.708 ± 0.642	76 ± 29 [38.718]	0.743 ± 0.092	0.983 [0.97, 0.99]	R Frontal - R Parietal
MyConnectome QB	166	2.566 ± 0.635	61 ± 25 [40.559]	0.593 ± 0.119	0.945 [0.90, 0.98]	R Occipital - R Occipital
MyConnectome QB	167	5.557 ± 0.534	14 ± 5 [34.993]	0.279 ± 0.054	0.944 [0.90, 0.97]	R Frontal - R Frontal
MyConnectome QB	168	2.278 ± 0.392	274 ± 89 [32.597]	0.858 ± 0.081	0.989 [0.98, 1.00]	L Parietal - L Parietal
MyConnectome QB	169	2.277 ± 0.252	87 ± 34 [38.790]	0.665 ± 0.089	0.976 [0.95, 0.99]	R Parietal - R Parietal
MyConnectome QB	170	2.389 ± 1.148	105 ± 46 [43.434]	0.623 ± 0.155	0.965 [0.94, 0.98]	R Frontal - R Parietal
MyConnectome QB	171	3.065 ± 1.361	51 ± 27 [52.448]	0.371 ± 0.123	0.883 [0.80, 0.94]	R Frontal - R Frontal
MyConnectome QB	172	4.959 ± 0.308	34 ± 12 [36.222]	0.523 ± 0.079	0.950 [0.91, 0.98]	L Frontal - L Frontal
MyConnectome QB	173	2.110 ± 0.927	81 ± 37 [45.269]	0.591 ± 0.185	0.962 [0.93, 0.98]	R Parietal - R Parietal
MyConnectome QB	174	2.101 ± 0.250	150 ± 40 [26.631]	0.810 ± 0.050	0.982 [0.97, 0.99]	R Frontal - R Frontal
MyConnectome QB	175	2.614 ± 0.404	103 ± 32 [31.153]	0.669 ± 0.093	0.964 [0.93, 0.98]	L Frontal - L Frontal
MyConnectome QB	176	2.566 ± 0.769	90 ± 39 [43.012]	0.734 ± 0.108	0.970 [0.95, 0.99]	R Parietal - R Parietal
MyConnectome QB	177	1.721 ± 0.535	82 ± 40 [49.302]	0.683 ± 0.135	0.959 [0.92, 0.98]	L Frontal - L Frontal
MyConnectome QB	178	3.179 ± 0.531	24 ± 8 [31.515]	0.328 ± 0.075	0.911 [0.84, 0.96]	R Parietal - R Parietal
MyConnectome QB	179	1.942 ± 1.052	88 ± 35 [39.565]	0.576 ± 0.133	0.983 [0.97, 0.99]	R Frontal - R Frontal
MyConnectome QB	180	2.540 ± 0.779	94 ± 29 [30.707]	0.709 ± 0.120	0.989 [0.98, 0.99]	L Parietal - L Parietal
MyConnectome QB	181	2.401 ± 1.007	67 ± 24 [36.660]	0.629 ± 0.175	0.940 [0.89, 0.97]	L Temporal - L Temporal
MyConnectome QB	182	1.604 ± 0.452	258 ± 65 [25.348]	0.856 ± 0.057	0.990 [0.98, 1.00]	R Frontal - R Frontal
MyConnectome QB	183	2.157 ± 0.814	119 ± 40 [33.985]	0.773 ± 0.080	0.987 [0.98, 0.99]	R Parietal - R Parietal
MyConnectome QB	184	1.452 ± 0.266	110 ± 27 [24.964]	0.810 ± 0.066	0.983 [0.97, 0.99]	R Frontal - R Frontal
MyConnectome QB	185	1.961 ± 0.662	102 ± 58 [57.358]	0.685 ± 0.133	0.966 [0.94, 0.98]	L Frontal - L Frontal
MyConnectome QB	186	1.557 ± 0.802	255 ± 46 [17.902]	0.812 ± 0.038	0.990 [0.98, 1.00]	R Parietal - R Parietal
MyConnectome QB	187	2.419 ± 0.588	84 ± 35 [41.259]	0.690 ± 0.099	0.967 [0.94, 0.98]	L Frontal - L Parietal
MyConnectome QB	188	1.725 ± 0.407	146 ± 34 [23.379]	0.789 ± 0.042	0.970 [0.95, 0.99]	R Parietal - R Parietal
MyConnectome QB	189	3.127 ± 0.349	97 ± 33 [34.531]	0.741 ± 0.060	0.978 [0.96, 0.99]	R Frontal - R Frontal
MyConnectome QB	190	2.050 ± 0.862	137 ± 42 [30.496]	0.699 ± 0.085	0.980 [0.96, 0.99]	L Occipital - L Occipital
MyConnectome QB	191	2.579 ± 0.645	44 ± 17 [39.175]	0.604 ± 0.126	0.949 [0.91, 0.98]	R Frontal - R Parietal
MyConnectome QB	192	3.228 ± 0.649	25 ± 6 [26.214]	0.421 ± 0.055	0.938 [0.89, 0.97]	R Frontal - R Frontal
MyConnectome QB	193	2.869 ± 0.187	99 ± 44 [43.892]	0.778 ± 0.094	0.978 [0.96, 0.99]	R Frontal - R Frontal
MyConnectome QB	194	2.407 ± 0.589	37 ± 17 [45.710]	0.511 ± 0.082	0.969 [0.94, 0.99]	R Frontal - R Frontal
MyConnectome QB	195	1.817 ± 0.525	38 ± 22 [58.410]	0.552 ± 0.100	0.947 [0.91, 0.98]	R Frontal - R Frontal
MyConnectome QB	196	2.403 ± 0.471	71 ± 27 [37.718]	0.594 ± 0.090	0.937 [0.88, 0.97]	R Parietal - R Parietal
MyConnectome QB	197	2.636 ± 0.325	112 ± 27 [24.096]	0.783 ± 0.060	0.992 [0.99, 1.00]	R Frontal - R Frontal
MyConnectome QB	198	3.096 ± 1.009	115 ± 39 [33.949]	0.515 ± 0.084	0.952 [0.91, 0.98]	L Frontal - L Frontal
MyConnectome QB	199	1.741 ± 0.509	66 ± 26 [39.231]	0.693 ± 0.090	0.970 [0.95, 0.99]	L Frontal - L Frontal
MyConnectome QB	200	3.070 ± 0.340	42 ± 10 [22.789]	0.597 ± 0.041	0.970 [0.95, 0.99]	L Parietal - L Parietal
MyConnectome QB	201	3.829 ± 0.503	59 ± 18 [30.985]	0.584 ± 0.100	0.978 [0.96, 0.99]	R Frontal - R Frontal
MyConnectome QB	202	2.906 ± 0.487	71 ± 25 [34.592]	0.664 ± 0.070	0.949 [0.91, 0.98]	R Frontal - R Parietal
MyConnectome QB	203	2.801 ± 1.258	239 ± 106 [44.362]	0.696 ± 0.114	0.973 [0.95, 0.99]	R Frontal - R Parietal
MyConnectome QB	204	2.406 ± 0.713	167 ± 70 [41.594]	0.768 ± 0.128	0.985 [0.97, 0.99]	R Frontal - R Frontal
MyConnectome QB	205	1.956 ± 0.270	157 ± 50 [31.572]	0.835 ± 0.069	0.983 [0.97, 0.99]	R Parietal - R Parietal
MyConnectome QB	206	2.515 ± 0.339	114 ± 38 [33.346]	0.773 ± 0.107	0.969 [0.94, 0.99]	L Frontal - L Parietal
MyConnectome QB	207	3.031 ± 0.701	40 ± 10 [25.950]	0.476 ± 0.058	0.955 [0.92, 0.98]	R Parietal - R Parietal
MyConnectome QB	208	1.942 ± 0.574	177 ± 40 [22.773]	0.763 ± 0.046	0.985 [0.97, 0.99]	L Parietal - L Temporal
MyConnectome QB	209	1.571 ± 0.656	91 ± 39 [43.326]	0.633 ± 0.097	0.929 [0.86, 0.97]	L Parietal - L Parietal
MyConnectome QB	210	2.992 ± 0.934	103 ± 52 [50.371]	0.721 ± 0.138	0.965 [0.94, 0.98]	L Parietal - L Parietal
MyConnectome QB	211	1.885 ± 0.561	88 ± 36 [40.519]	0.731 ± 0.094	0.965 [0.93, 0.98]	R Parietal - R Parietal
MyConnectome QB	212	2.142 ± 0.479	53 ± 13 [25.341]	0.643 ± 0.071	0.966 [0.94, 0.98]	R Parietal - R Parietal
MyConnectome QB	213	2.024 ± 0.569	93 ± 30 [32.193]	0.722 ± 0.085	0.971 [0.94, 0.99]	R Frontal - R Frontal
MyConnectome QB	214	2.676 ± 0.253	43 ± 11 [25.369]	0.527 ± 0.058	0.949 [0.91, 0.98]	L Parietal - L Parietal
MyConnectome QB	215	1.580 ± 0.419	172 ± 43 [24.800]	0.833 ± 0.047	0.991 [0.98, 1.00]	L Frontal - L Frontal
MyConnectome QB	216	1.545 ± 0.386	103 ± 15 [14.334]	0.749 ± 0.023	0.981 [0.96, 0.99]	L Frontal - L Frontal
MyConnectome QB	217	1.800 ± 0.562	191 ± 72 [37.599]	0.768 ± 0.119	0.981 [0.96, 0.99]	R Frontal - R Parietal
MyConnectome QB	218	3.238 ± 1.150	45 ± 13 [28.340]	0.380 ± 0.093	0.928 [0.87, 0.97]	R Frontal - R Frontal
MyConnectome QB	219	3.051 ± 0.780	51 ± 20 [38.654]	0.479 ± 0.087	0.896 [0.83, 0.95]	R Parietal - R Parietal
MyConnectome QB	220	2.418 ± 0.324	146 ± 41 [27.887]	0.722 ± 0.041	0.981 [0.96, 0.99]	L Parietal - L Parietal
MyConnectome QB	221	2.581 ± 0.812	18 ± 6 [33.615]	0.340 ± 0.079	0.945 [0.91, 0.97]	L Parietal - L Parietal
MyConnectome QB	222	5.421 ± 1.536	154 ± 90 [58.788]	0.348 ± 0.111	0.806 [0.68, 0.90]	Cerebellum
MyConnectome QB	223	2.807 ± 0.825	118 ± 29 [24.803]	0.630 ± 0.049	0.962 [0.92, 0.98]	L Frontal - L Parietal
MyConnectome QB	224	1.907 ± 0.411	78 ± 32 [40.514]	0.594 ± 0.128	0.973 [0.95, 0.99]	L Frontal - L Parietal
MyConnectome QB	225	1.696 ± 0.584	103 ± 42 [40.832]	0.657 ± 0.154	0.976 [0.96, 0.99]	R Frontal - R Parietal
MyConnectome QB	226	2.077 ± 0.536	41 ± 14 [32.976]	0.469 ± 0.093	0.908 [0.83, 0.96]	R Parietal - R Temporal
MyConnectome QB	227	2.741 ± 0.949	60 ± 16 [26.176]	0.524 ± 0.041	0.899 [0.82, 0.95]	L Temporal - L Temporal
MyConnectome QB	228	1.928 ± 0.539	63 ± 20 [31.447]	0.610 ± 0.097	0.966 [0.94, 0.98]	R Parietal - R Temporal
MyConnectome QB	229	2.862 ± 0.343	103 ± 47 [45.618]	0.657 ± 0.139	0.960 [0.92, 0.98]	R Occipital - R Occipital
MyConnectome QB	230	2.014 ± 0.381	64 ± 20 [31.958]	0.602 ± 0.066	0.895 [0.80, 0.95]	L Frontal - L Frontal
MyConnectome QB	231	2.130 ± 0.345	110 ± 38 [34.066]	0.787 ± 0.080	0.977 [0.96, 0.99]	L Parietal - L Parietal
MyConnectome QB	232	2.788 ± 0.303	90 ± 34 [37.528]	0.713 ± 0.094	0.970 [0.94, 0.99]	R Parietal - R Parietal
MyConnectome QB	233	2.251 ± 0.764	164 ± 43 [26.419]	0.796 ± 0.075	0.991 [0.98, 1.00]	Cerebellum
MyConnectome QB	234	1.818 ± 0.396	51 ± 17 [33.430]	0.676 ± 0.099	0.961 [0.93, 0.98]	L Parietal - L Parietal
MyConnectome QB	235	1.762 ± 0.463	182 ± 35 [19.076]	0.788 ± 0.044	0.991 [0.98, 1.00]	R Frontal - R Frontal
MyConnectome QB	236	2.875 ± 0.383	115 ± 48 [41.446]	0.679 ± 0.066	0.961 [0.92, 0.98]	L Frontal - L Frontal
MyConnectome QB	237	2.752 ± 1.153	169 ± 60 [35.584]	0.620 ± 0.085	0.949 [0.90, 0.98]	R Parietal - R Temporal
MyConnectome QB	238	1.917 ± 0.766	27 ± 12 [43.998]	0.499 ± 0.123	0.962 [0.93, 0.98]	L Frontal - L Frontal
MyConnectome QB	239	2.440 ± 0.468	204 ± 77 [37.630]	0.801 ± 0.103	0.987 [0.98, 0.99]	R Frontal - R Frontal
MyConnectome QB	240	1.765 ± 0.321	127 ± 26 [20.922]	0.812 ± 0.037	0.992 [0.99, 1.00]	L Frontal - L Frontal
MyConnectome QB	241	1.730 ± 0.239	214 ± 39 [18.127]	0.822 ± 0.026	0.985 [0.97, 0.99]	R Parietal - R Parietal
MyConnectome QB	242	3.463 ± 0.857	37 ± 12 [32.917]	0.504 ± 0.068	0.953 [0.92, 0.98]	R Parietal - R Parietal
MyConnectome QB	243	2.007 ± 0.418	85 ± 26 [30.522]	0.701 ± 0.066	0.980 [0.96, 0.99]	L Frontal - L Parietal
MyConnectome QB	244	2.527 ± 0.601	104 ± 42 [40.744]	0.701 ± 0.152	0.946 [0.91, 0.97]	R Frontal - R Parietal
MyConnectome QB	245	2.161 ± 0.325	101 ± 30 [30.040]	0.749 ± 0.106	0.983 [0.97, 0.99]	R Temporal - R Temporal
MyConnectome QB	246	1.848 ± 0.753	102 ± 32 [30.918]	0.663 ± 0.087	0.973 [0.95, 0.99]	Cerebellum
MyConnectome QB	247	2.209 ± 0.611	104 ± 55 [53.521]	0.722 ± 0.172	0.967 [0.94, 0.98]	R Parietal - R Parietal
MyConnectome QB	248	2.663 ± 0.448	46 ± 12 [25.970]	0.592 ± 0.055	0.977 [0.96, 0.99]	R Frontal - R Frontal
MyConnectome QB	249	3.535 ± 1.684	105 ± 58 [55.198]	0.543 ± 0.144	0.940 [0.89, 0.97]	R Parietal - R Parietal
MyConnectome QB	250	2.139 ± 0.574	68 ± 13 [18.325]	0.633 ± 0.044	0.973 [0.95, 0.99]	L Parietal - L Parietal
MyConnectome QB	251	2.625 ± 0.817	115 ± 38 [33.222]	0.760 ± 0.079	0.948 [0.91, 0.98]	L Frontal - L Frontal
MyConnectome QB	252	2.071 ± 0.298	141 ± 28 [19.623]	0.711 ± 0.048	0.982 [0.97, 0.99]	R Occipital - R Occipital
MyConnectome QB	253	2.208 ± 0.814	170 ± 85 [49.971]	0.745 ± 0.135	0.978 [0.96, 0.99]	R Parietal - R Parietal
MyConnectome QB	254	2.554 ± 0.662	111 ± 53 [47.421]	0.703 ± 0.155	0.982 [0.97, 0.99]	R Frontal - R Frontal
MyConnectome QB	255	2.606 ± 0.536	85 ± 44 [51.658]	0.732 ± 0.105	0.945 [0.89, 0.98]	R Frontal - R Frontal
MyConnectome QB	256	2.586 ± 0.592	10 ± 3 [29.898]	0.180 ± 0.050	0.788 [0.67, 0.89]	L Frontal - L Frontal
MyConnectome QB	257	2.233 ± 1.176	87 ± 32 [36.384]	0.608 ± 0.109	0.958 [0.92, 0.98]	L Temporal - L Temporal
MyConnectome QB	258	2.307 ± 0.688	84 ± 30 [35.477]	0.714 ± 0.123	0.979 [0.96, 0.99]	R Frontal - R Parietal
MyConnectome QB	259	2.364 ± 0.770	181 ± 68 [37.390]	0.725 ± 0.107	0.980 [0.96, 0.99]	R Parietal - R Parietal
MyConnectome QB	260	3.132 ± 0.539	111 ± 42 [37.902]	0.786 ± 0.098	0.967 [0.94, 0.99]	L Frontal - L Frontal
MyConnectome QB	261	2.113 ± 0.381	103 ± 22 [21.254]	0.739 ± 0.044	0.986 [0.98, 0.99]	R Frontal - R Parietal
MyConnectome QB	262	1.988 ± 0.485	26 ± 10 [38.201]	0.443 ± 0.086	0.930 [0.87, 0.97]	R Frontal - R Frontal
MyConnectome QB	263	2.619 ± 0.860	138 ± 38 [27.322]	0.647 ± 0.054	0.957 [0.92, 0.98]	Cerebellum
MyConnectome QB	264	2.040 ± 0.473	57 ± 13 [22.881]	0.677 ± 0.072	0.979 [0.96, 0.99]	L Parietal - L Parietal
MyConnectome QB	265	2.665 ± 1.412	192 ± 75 [39.039]	0.626 ± 0.140	0.836 [0.68, 0.93]	R Frontal - R Frontal
MyConnectome QB	266	2.634 ± 1.139	108 ± 37 [34.145]	0.474 ± 0.100	0.906 [0.84, 0.96]	L Frontal - L Frontal
MyConnectome QB	267	2.128 ± 0.484	52 ± 19 [36.191]	0.689 ± 0.090	0.970 [0.95, 0.99]	R Frontal - R Frontal
MyConnectome QB	268	1.305 ± 0.535	87 ± 35 [40.210]	0.748 ± 0.111	0.975 [0.95, 0.99]	L Parietal - L Parietal
MyConnectome QB	269	2.308 ± 0.901	70 ± 17 [24.257]	0.554 ± 0.105	0.951 [0.91, 0.98]	R Parietal - R Parietal
MyConnectome QB	270	4.872 ± 0.273	100 ± 47 [47.629]	0.697 ± 0.143	0.974 [0.95, 0.99]	R Frontal - R Frontal
MyConnectome QB	271	2.144 ± 0.626	46 ± 19 [40.891]	0.570 ± 0.115	0.955 [0.92, 0.98]	R Frontal - R Parietal
MyConnectome QB	272	2.629 ± 1.317	201 ± 79 [39.395]	0.618 ± 0.106	0.928 [0.85, 0.97]	L Frontal - L Frontal
MyConnectome QB	273	1.885 ± 0.478	32 ± 14 [42.524]	0.575 ± 0.088	0.964 [0.93, 0.98]	R Frontal - R Frontal
MyConnectome QB	274	1.784 ± 0.781	64 ± 19 [30.100]	0.559 ± 0.109	0.967 [0.94, 0.98]	R Frontal - R Parietal
MyConnectome QB	275	2.966 ± 0.689	74 ± 22 [30.264]	0.571 ± 0.088	0.913 [0.85, 0.96]	R Parietal - R Parietal
MyConnectome QB	276	1.908 ± 0.677	87 ± 38 [44.130]	0.695 ± 0.106	0.974 [0.95, 0.99]	L Parietal - L Parietal
MyConnectome QB	277	2.460 ± 0.766	108 ± 26 [24.134]	0.732 ± 0.098	0.982 [0.97, 0.99]	L Parietal - L Parietal
MyConnectome QB	278	2.323 ± 0.989	73 ± 40 [54.595]	0.547 ± 0.124	0.960 [0.93, 0.98]	R Frontal - R Parietal
MyConnectome QB	279	1.467 ± 0.410	93 ± 28 [29.641]	0.728 ± 0.082	0.980 [0.96, 0.99]	R Frontal - R Frontal
MyConnectome QB	280	2.180 ± 0.618	131 ± 51 [38.683]	0.797 ± 0.100	0.976 [0.95, 0.99]	L Frontal - L Frontal
MyConnectome QB	281	2.402 ± 0.708	59 ± 25 [41.852]	0.648 ± 0.114	0.936 [0.88, 0.97]	L Parietal - L Parietal
MyConnectome QB	282	2.197 ± 0.546	116 ± 42 [36.088]	0.739 ± 0.153	0.983 [0.97, 0.99]	R Frontal - R Frontal
MyConnectome QB	283	3.113 ± 1.077	67 ± 21 [31.654]	0.290 ± 0.056	0.768 [0.63, 0.88]	L Frontal - L Frontal
MyConnectome QB	284	3.287 ± 1.228	112 ± 60 [53.715]	0.623 ± 0.131	0.947 [0.91, 0.98]	R Parietal - R Parietal
MyConnectome QB	285	2.349 ± 0.642	92 ± 25 [27.290]	0.755 ± 0.062	0.976 [0.95, 0.99]	R Frontal - R Frontal
MyConnectome QB	286	2.458 ± 0.339	52 ± 11 [20.463]	0.636 ± 0.052	0.974 [0.95, 0.99]	R Parietal - R Parietal
MyConnectome QB	287	3.315 ± 0.639	64 ± 19 [29.339]	0.523 ± 0.069	0.963 [0.93, 0.98]	R Frontal - R Frontal
MyConnectome QB	288	3.825 ± 0.877	66 ± 31 [46.672]	0.511 ± 0.105	0.904 [0.83, 0.96]	L Frontal - L Frontal
MyConnectome QB	289	3.570 ± 1.667	206 ± 106 [51.650]	0.703 ± 0.146	0.977 [0.96, 0.99]	R Parietal - R Parietal
MyConnectome QB	290	2.132 ± 0.975	60 ± 27 [44.841]	0.522 ± 0.114	0.980 [0.96, 0.99]	R Parietal - R Parietal
MyConnectome QB	291	2.108 ± 0.334	75 ± 22 [29.345]	0.655 ± 0.065	0.972 [0.95, 0.99]	L Temporal - L Temporal
MyConnectome QB	292	4.560 ± 0.397	52 ± 15 [28.530]	0.571 ± 0.056	0.943 [0.90, 0.97]	R Temporal - R Temporal
MyConnectome QB	293	2.504 ± 1.498	282 ± 78 [27.826]	0.784 ± 0.101	0.986 [0.97, 0.99]	R Temporal - R Temporal
MyConnectome QB	294	3.002 ± 0.553	63 ± 33 [51.420]	0.615 ± 0.144	0.953 [0.92, 0.98]	R Frontal - R Parietal
MyConnectome QB	295	1.814 ± 0.496	108 ± 56 [52.083]	0.729 ± 0.121	0.991 [0.98, 1.00]	R Frontal - R Cingulate
MyConnectome QB	296	2.085 ± 0.345	114 ± 37 [32.499]	0.732 ± 0.051	0.972 [0.95, 0.99]	L Temporal - L Temporal
MyConnectome QB	297	1.867 ± 0.635	115 ± 40 [35.057]	0.728 ± 0.112	0.976 [0.95, 0.99]	R Parietal - R Parietal
MyConnectome QB	298	2.899 ± 0.853	185 ± 70 [37.743]	0.774 ± 0.167	0.976 [0.95, 0.99]	L Parietal - L Parietal
MyConnectome QB	299	3.569 ± 1.139	126 ± 48 [37.608]	0.568 ± 0.087	0.925 [0.86, 0.97]	R Parietal - R Parietal
MyConnectome QB	300	3.106 ± 0.982	229 ± 106 [46.377]	0.646 ± 0.180	0.956 [0.92, 0.98]	L Frontal - L Frontal
MyConnectome QB	301	2.711 ± 0.738	59 ± 24 [41.013]	0.559 ± 0.120	0.946 [0.90, 0.98]	R Parietal - R Parietal
MyConnectome QB	302	3.005 ± 1.246	114 ± 72 [62.974]	0.477 ± 0.217	0.957 [0.92, 0.98]	R Frontal - R Frontal
MyConnectome QB	303	1.358 ± 0.606	41 ± 15 [36.564]	0.536 ± 0.122	0.968 [0.94, 0.98]	R Frontal - R Frontal
MyConnectome QB	304	1.656 ± 0.200	190 ± 41 [21.311]	0.878 ± 0.028	0.991 [0.98, 1.00]	R Parietal - R Parietal
MyConnectome QB	305	1.845 ± 0.524	60 ± 28 [45.703]	0.640 ± 0.144	0.946 [0.90, 0.98]	Cerebellum
MyConnectome QB	306	2.949 ± 0.985	176 ± 91 [51.629]	0.667 ± 0.119	0.974 [0.95, 0.99]	L Parietal - L Parietal
MyConnectome QB	307	1.827 ± 1.094	140 ± 50 [35.634]	0.744 ± 0.136	0.985 [0.97, 0.99]	R Frontal - R Parietal
MyConnectome QB	308	3.204 ± 1.051	46 ± 21 [46.179]	0.526 ± 0.129	0.962 [0.93, 0.98]	R Frontal - R Frontal
MyConnectome QB	309	2.938 ± 0.808	45 ± 16 [35.155]	0.495 ± 0.100	0.888 [0.78, 0.95]	R Frontal - R Frontal
MyConnectome QB	310	2.882 ± 0.805	21 ± 10 [49.172]	0.469 ± 0.101	0.927 [0.88, 0.97]	L Frontal - L Frontal
MyConnectome QB	311	2.402 ± 0.801	66 ± 29 [44.271]	0.507 ± 0.115	0.925 [0.87, 0.97]	R Frontal - R Frontal
MyConnectome QB	312	2.684 ± 0.582	61 ± 26 [42.782]	0.590 ± 0.093	0.951 [0.91, 0.98]	R Frontal - R Frontal
MyConnectome QB	313	2.983 ± 1.411	128 ± 36 [27.962]	0.552 ± 0.077	0.884 [0.77, 0.95]	R Frontal - R Frontal
MyConnectome QB	314	3.845 ± 0.760	86 ± 37 [43.589]	0.478 ± 0.073	0.847 [0.75, 0.93]	L Temporal - L Temporal
MyConnectome QB	315	2.624 ± 0.571	66 ± 31 [46.816]	0.592 ± 0.142	0.982 [0.96, 0.99]	L Frontal - L Parietal
MyConnectome QB	316	1.686 ± 0.651	108 ± 37 [34.240]	0.722 ± 0.129	0.975 [0.95, 0.99]	R Parietal - R Parietal
MyConnectome QB	317	2.694 ± 0.829	30 ± 14 [47.107]	0.401 ± 0.100	0.893 [0.82, 0.95]	R Parietal - R Cingulate
MyConnectome QB	318	2.464 ± 0.490	87 ± 28 [32.098]	0.670 ± 0.071	0.980 [0.96, 0.99]	L Parietal - L Parietal
MyConnectome QB	319	4.477 ± 1.014	8 ± 3 [33.740]	0.130 ± 0.054	0.843 [0.75, 0.92]	R Frontal - R Frontal
MyConnectome QB	320	2.248 ± 0.640	24 ± 7 [27.435]	0.501 ± 0.076	0.920 [0.86, 0.96]	R Parietal - R Parietal
MyConnectome QB	321	1.202 ± 0.655	37 ± 13 [36.454]	0.583 ± 0.116	0.940 [0.89, 0.97]	R Frontal - R Frontal
MyConnectome QB	322	3.715 ± 1.213	332 ± 178 [53.659]	0.577 ± 0.122	0.884 [0.77, 0.95]	L Frontal - L Frontal
MyConnectome QB	323	2.127 ± 0.569	88 ± 37 [42.023]	0.686 ± 0.107	0.951 [0.91, 0.98]	L Frontal - L Frontal
MyConnectome QB	324	4.016 ± 0.635	22 ± 10 [46.615]	0.414 ± 0.106	0.953 [0.92, 0.98]	L Occipital - L Occipital
MyConnectome QB	325	2.185 ± 0.905	43 ± 20 [46.034]	0.559 ± 0.151	0.933 [0.88, 0.97]	R Frontal - R Frontal
MyConnectome QB	326	3.942 ± 0.301	29 ± 14 [48.566]	0.431 ± 0.121	0.945 [0.90, 0.97]	R Parietal - R Parietal
MyConnectome QB	327	4.002 ± 0.645	30 ± 11 [36.366]	0.392 ± 0.071	0.924 [0.87, 0.96]	L Parietal - L Parietal
MyConnectome QB	328	4.992 ± 0.519	11 ± 4 [37.611]	0.222 ± 0.045	0.876 [0.80, 0.94]	R Frontal - R Frontal
MyConnectome QB	329	2.313 ± 0.345	57 ± 18 [31.980]	0.546 ± 0.106	0.867 [0.77, 0.94]	R Frontal - R Frontal
MyConnectome QB	330	1.991 ± 0.971	56 ± 22 [38.432]	0.456 ± 0.099	0.925 [0.86, 0.97]	R Parietal - R Parietal
MyConnectome QB	331	2.785 ± 0.602	77 ± 25 [32.268]	0.606 ± 0.107	0.963 [0.93, 0.98]	R Frontal - R Frontal
MyConnectome QB	332	2.314 ± 0.778	126 ± 41 [32.698]	0.772 ± 0.153	0.937 [0.86, 0.97]	L Frontal - L Frontal
MyConnectome QB	333	2.484 ± 0.776	97 ± 49 [50.705]	0.748 ± 0.134	0.970 [0.95, 0.99]	R Frontal - R Frontal
MyConnectome QB	334	1.701 ± 0.380	152 ± 56 [36.893]	0.799 ± 0.067	0.980 [0.96, 0.99]	R Parietal - R Parietal
MyConnectome QB	335	2.068 ± 0.296	40 ± 14 [35.532]	0.491 ± 0.079	0.946 [0.91, 0.97]	R Occipital - R Occipital
MyConnectome QB	336	2.365 ± 0.524	54 ± 16 [29.166]	0.615 ± 0.098	0.963 [0.93, 0.98]	L Frontal - L Frontal
MyConnectome QB	337	1.823 ± 1.078	126 ± 49 [38.635]	0.724 ± 0.150	0.978 [0.96, 0.99]	L Frontal - L Frontal
MyConnectome QB	338	1.893 ± 0.950	33 ± 13 [40.360]	0.529 ± 0.109	0.919 [0.86, 0.96]	L Frontal - L Frontal
MyConnectome QB	339	2.395 ± 0.981	34 ± 12 [34.979]	0.451 ± 0.108	0.938 [0.89, 0.97]	R Frontal - R Frontal
MyConnectome QB	340	3.061 ± 0.391	29 ± 12 [42.248]	0.457 ± 0.102	0.912 [0.85, 0.96]	R Frontal - R Frontal
MyConnectome QB	341	3.080 ± 0.701	12 ± 6 [46.207]	0.264 ± 0.074	0.926 [0.87, 0.96]	L Occipital - L Occipital
MyConnectome QB	342	2.092 ± 0.657	103 ± 25 [24.594]	0.720 ± 0.061	0.987 [0.98, 0.99]	L Occipital - L Occipital
MyConnectome QB	343	3.161 ± 1.854	9 ± 6 [64.882]	0.260 ± 0.143	0.814 [0.71, 0.91]	R Parietal - R Parietal
MyConnectome QB	344	3.515 ± 1.046	13 ± 6 [41.050]	0.209 ± 0.048	0.807 [0.70, 0.90]	R Frontal - R Parietal
MyConnectome QB	345	1.644 ± 0.351	33 ± 9 [28.344]	0.547 ± 0.087	0.955 [0.92, 0.98]	R Frontal - R Frontal
MyConnectome QB	346	2.151 ± 0.645	63 ± 21 [33.945]	0.695 ± 0.080	0.926 [0.87, 0.97]	L Frontal - L Parietal
MyConnectome QB	347	1.750 ± 0.412	114 ± 29 [25.444]	0.745 ± 0.072	0.977 [0.96, 0.99]	L Parietal - L Parietal
MyConnectome QB	348	3.232 ± 1.237	57 ± 20 [35.105]	0.441 ± 0.072	0.750 [0.58, 0.88]	R Frontal - R Parietal
MyConnectome QB	349	-	-	-	-	L Frontal - L Frontal
MyConnectome QB	350	1.360 ± 0.284	83 ± 9 [10.239]	0.721 ± 0.021	0.983 [0.97, 0.99]	L Frontal - L Frontal
MyConnectome QB	351	1.639 ± 0.420	45 ± 15 [33.959]	0.698 ± 0.116	0.932 [0.88, 0.97]	L Frontal - L Frontal
MyConnectome QB	352	1.867 ± 1.058	36 ± 11 [31.547]	0.493 ± 0.119	0.954 [0.92, 0.98]	R Frontal - R Frontal
MyConnectome QB	353	3.893 ± 0.373	30 ± 14 [47.130]	0.521 ± 0.095	0.984 [0.97, 0.99]	R Frontal - R Frontal
MyConnectome QB	354	2.668 ± 0.548	28 ± 11 [40.258]	0.496 ± 0.097	0.918 [0.86, 0.96]	L Parietal - L Parietal
MyConnectome QB	355	2.382 ± 0.794	13 ± 5 [36.549]	0.321 ± 0.082	0.926 [0.87, 0.96]	R Parietal - R Parietal
MyConnectome QB	356	3.560 ± 0.613	15 ± 6 [41.527]	0.200 ± 0.050	0.764 [0.64, 0.88]	R Frontal - R Frontal
MyConnectome QB	357	2.823 ± 1.149	30 ± 13 [45.322]	0.448 ± 0.159	0.903 [0.84, 0.95]	L Frontal - L Frontal
MyConnectome QB	358	2.408 ± 0.481	166 ± 40 [24.338]	0.764 ± 0.037	0.983 [0.97, 0.99]	L Frontal - L Frontal
MyConnectome QB	359	2.647 ± 0.313	41 ± 16 [38.551]	0.497 ± 0.110	0.936 [0.89, 0.97]	R Temporal - R Cingulate
MyConnectome QB	360	2.440 ± 0.631	46 ± 20 [42.971]	0.427 ± 0.098	0.900 [0.83, 0.95]	R Frontal - R Frontal
MyConnectome QB	361	3.423 ± 0.382	37 ± 13 [34.435]	0.542 ± 0.091	0.961 [0.93, 0.98]	R Frontal - R Frontal
MyConnectome QB	362	2.421 ± 0.501	13 ± 6 [41.141]	0.212 ± 0.059	0.948 [0.91, 0.98]	L Temporal - L Temporal
MyConnectome QB	363	2.026 ± 1.228	262 ± 91 [34.761]	0.810 ± 0.151	0.986 [0.97, 0.99]	L Parietal - L Parietal
MyConnectome QB	364	2.236 ± 0.707	197 ± 73 [36.982]	0.735 ± 0.139	0.986 [0.97, 0.99]	R Parietal - R Parietal
MyConnectome QB	365	3.642 ± 0.619	16 ± 5 [29.857]	0.299 ± 0.055	0.921 [0.87, 0.96]	R Frontal - R Frontal
MyConnectome QB	366	2.710 ± 1.133	11 ± 5 [43.868]	0.316 ± 0.090	0.864 [0.78, 0.93]	Cerebellum
MyConnectome QB	367	3.640 ± 0.960	36 ± 19 [51.339]	0.404 ± 0.121	0.871 [0.76, 0.94]	R Parietal - R Parietal
MyConnectome QB	368	1.890 ± 0.462	72 ± 18 [25.097]	0.724 ± 0.050	0.984 [0.97, 0.99]	L Frontal - L Parietal
MyConnectome QB	369	5.020 ± 1.452	3 ± 1 [55.558]	0.068 ± 0.041	0.629 [0.48, 0.79]	R Frontal - R Frontal
MyConnectome QB	370	3.710 ± 0.782	7 ± 3 [43.932]	0.184 ± 0.066	0.735 [0.60, 0.86]	Cerebellum
MyConnectome QB	371	1.957 ± 0.593	25 ± 12 [46.482]	0.552 ± 0.113	0.905 [0.83, 0.96]	L Frontal - L Frontal
MyConnectome QB	372	2.258 ± 0.499	41 ± 8 [18.707]	0.638 ± 0.041	0.976 [0.96, 0.99]	L Parietal - L Parietal
MyConnectome QB	373	1.939 ± 1.238	145 ± 50 [34.762]	0.703 ± 0.151	0.975 [0.95, 0.99]	L Occipital - L Occipital
MyConnectome QB	374	2.126 ± 0.434	40 ± 7 [18.184]	0.545 ± 0.052	0.976 [0.96, 0.99]	L Frontal - L Frontal
MyConnectome QB	375	4.130 ± 1.290	32 ± 22 [69.390]	0.347 ± 0.131	0.932 [0.87, 0.97]	L Frontal - L Temporal
MyConnectome QB	376	3.631 ± 0.957	37 ± 18 [47.201]	0.283 ± 0.069	0.705 [0.54, 0.85]	L Parietal - L Parietal
MyConnectome QB	377	2.729 ± 0.854	49 ± 16 [33.078]	0.685 ± 0.100	0.963 [0.93, 0.98]	R Frontal - R Frontal
MyConnectome QB	378	2.079 ± 0.764	76 ± 39 [51.855]	0.638 ± 0.137	0.869 [0.78, 0.94]	L Parietal - L Temporal
MyConnectome QB	379	5.176 ± 0.377	17 ± 8 [44.981]	0.362 ± 0.117	0.958 [0.93, 0.98]	R Temporal - R Temporal
MyConnectome QB	380	-	-	-	-	L Frontal - L Frontal
MyConnectome QB	381	2.130 ± 0.932	14 ± 5 [32.184]	0.253 ± 0.061	0.887 [0.81, 0.94]	L Frontal - L Parietal
MyConnectome QB	382	4.441 ± 0.998	8 ± 3 [43.002]	0.189 ± 0.058	0.912 [0.85, 0.96]	L Frontal - L Frontal
MyConnectome QB	383	2.252 ± 0.289	227 ± 46 [20.173]	0.838 ± 0.022	0.986 [0.97, 0.99]	R Frontal - R Frontal
MyConnectome QB	384	1.678 ± 0.476	21 ± 8 [39.038]	0.389 ± 0.084	0.950 [0.91, 0.98]	R Parietal - R Parietal
MyConnectome QB	385	2.185 ± 0.786	58 ± 26 [45.291]	0.612 ± 0.109	0.961 [0.92, 0.98]	R Frontal - R Frontal
MyConnectome QB	386	1.566 ± 0.635	28 ± 10 [34.666]	0.474 ± 0.073	0.884 [0.81, 0.94]	R Frontal - R Frontal
MyConnectome QB	387	2.698 ± 1.322	49 ± 34 [69.435]	0.371 ± 0.211	0.856 [0.73, 0.93]	L Parietal - L Parietal
MyConnectome QB	388	1.700 ± 0.740	36 ± 19 [53.207]	0.539 ± 0.144	0.908 [0.83, 0.96]	L Frontal - L Frontal
MyConnectome QB	389	2.122 ± 0.455	29 ± 13 [44.499]	0.458 ± 0.092	0.896 [0.82, 0.95]	L Parietal - L Parietal
MyConnectome QB	390	2.506 ± 0.712	95 ± 43 [45.366]	0.714 ± 0.181	0.977 [0.96, 0.99]	L Frontal - L Parietal
MyConnectome QB	391	3.737 ± 2.192	633 ± 308 [48.712]	0.727 ± 0.203	0.920 [0.86, 0.96]	R Frontal - R Frontal
MyConnectome QB	392	3.450 ± 1.411	418 ± 114 [27.331]	0.723 ± 0.064	0.936 [0.87, 0.97]	L Frontal - L Frontal
MyConnectome QB	393	2.699 ± 0.261	82 ± 28 [34.450]	0.740 ± 0.112	0.977 [0.96, 0.99]	R Frontal - R Frontal
MyConnectome QB	394	4.390 ± 1.864	12 ± 9 [80.189]	0.119 ± 0.066	0.378 [0.23, 0.59]	R Frontal - R Frontal
MyConnectome QB	395	2.715 ± 1.353	44 ± 37 [83.812]	0.449 ± 0.115	0.283 [0.16, 0.48]	R Occipital - R Occipital
MyConnectome QB	396	4.973 ± 1.863	43 ± 35 [81.728]	0.204 ± 0.098	0.258 [0.14, 0.45]	L Parietal - L Parietal
MyConnectome QB	397	2.800 ± 2.116	17 ± 7 [41.654]	0.337 ± 0.148	0.747 [0.56, 0.88]	L Occipital - L Occipital
MyConnectome QB	398	3.149 ± 0.944	16 ± 8 [51.032]	0.297 ± 0.114	0.919 [0.86, 0.96]	L Frontal - L Frontal
MyConnectome QB	399	4.347 ± 0.752	22 ± 9 [40.578]	0.414 ± 0.115	0.938 [0.89, 0.97]	L Frontal - L Frontal
MyConnectome QB	400	4.070 ± 0.374	35 ± 16 [46.761]	0.481 ± 0.109	0.951 [0.91, 0.98]	L Parietal - L Parietal
MyConnectome QB	401	1.863 ± 0.377	46 ± 20 [44.634]	0.690 ± 0.107	0.950 [0.91, 0.98]	L Frontal - L Frontal
MyConnectome QB	402	3.736 ± 0.482	39 ± 16 [42.304]	0.567 ± 0.109	0.916 [0.86, 0.96]	L Frontal - L Frontal
MyConnectome QB	403	3.373 ± 0.626	14 ± 4 [33.030]	0.259 ± 0.074	0.914 [0.86, 0.96]	R Frontal - R Frontal
MyConnectome QB	404	2.533 ± 0.777	73 ± 38 [51.573]	0.606 ± 0.138	0.962 [0.93, 0.98]	L Parietal - L Parietal
MyConnectome QB	405	2.075 ± 0.690	25 ± 11 [44.647]	0.394 ± 0.139	0.954 [0.92, 0.98]	R Frontal - R Frontal
MyConnectome QB	406	-	-	-	-	L Frontal - L Frontal
MyConnectome QB	407	4.003 ± 0.425	41 ± 14 [35.461]	0.554 ± 0.088	0.976 [0.96, 0.99]	R Frontal - R Frontal
MyConnectome QB	408	-	-	-	-	L Frontal - L Frontal
MyConnectome QB	409	3.137 ± 0.877	6 ± 2 [38.992]	0.189 ± 0.055	0.765 [0.64, 0.88]	R Occipital - R Occipital
MyConnectome QB	410	3.083 ± 1.288	112 ± 36 [31.756]	0.676 ± 0.151	0.974 [0.95, 0.99]	L Frontal - L Frontal
MyConnectome QB	411	4.494 ± 1.023	7 ± 3 [49.724]	0.131 ± 0.055	0.881 [0.80, 0.94]	L Frontal - L Frontal
MyConnectome QB	412	3.572 ± 1.602	7 ± 4 [49.615]	0.194 ± 0.100	0.731 [0.60, 0.86]	L Frontal - L Temporal
MyConnectome QB	413	3.363 ± 1.514	103 ± 81 [78.749]	0.476 ± 0.112	0.649 [0.45, 0.82]	L Occipital - L Occipital
MyConnectome QB	414	2.009 ± 0.840	160 ± 65 [40.632]	0.718 ± 0.227	0.968 [0.94, 0.99]	Cerebellum
MyConnectome QB	415	3.371 ± 0.693	12 ± 4 [36.027]	0.257 ± 0.054	0.863 [0.78, 0.93]	R Parietal - R Parietal
MyConnectome QB	416	-	-	-	-	L Parietal - L Occipital
MyConnectome QB	417	2.641 ± 0.591	11 ± 5 [41.384]	0.249 ± 0.070	0.888 [0.81, 0.95]	R Parietal - R Parietal
MyConnectome QB	418	-	-	-	-	R Frontal - R Frontal
MyConnectome QB	419	3.775 ± 1.127	8 ± 3 [36.648]	0.161 ± 0.050	0.722 [0.58, 0.85]	R Parietal - R Parietal
MyConnectome QB	420	2.694 ± 1.253	21 ± 7 [33.608]	0.374 ± 0.081	0.927 [0.87, 0.97]	L Parietal - L Parietal
MyConnectome QB	421	-	-	-	-	R Parietal - R Parietal
MyConnectome QB	422	2.423 ± 0.622	294 ± 95 [32.464]	0.749 ± 0.088	0.936 [0.89, 0.97]	L Frontal - L Frontal
MyConnectome QB	423	3.289 ± 1.377	18 ± 9 [49.104]	0.233 ± 0.096	0.931 [0.88, 0.97]	R Frontal - R Cingulate
MyConnectome QB	424	2.071 ± 1.024	35 ± 15 [42.665]	0.603 ± 0.127	0.955 [0.92, 0.98]	L Frontal - L Frontal
MyConnectome QB	425	2.892 ± 1.152	64 ± 11 [16.785]	0.450 ± 0.062	0.736 [0.53, 0.87]	L Temporal - L Temporal
MyConnectome QB	426	2.718 ± 1.219	14 ± 7 [51.879]	0.308 ± 0.112	0.908 [0.83, 0.96]	R Frontal - R Parietal
MyConnectome QB	427	3.078 ± 1.252	117 ± 35 [30.127]	0.575 ± 0.115	0.963 [0.93, 0.98]	R Parietal - R Temporal
MyConnectome QB	428	2.704 ± 1.256	16 ± 8 [51.320]	0.358 ± 0.130	0.862 [0.77, 0.93]	L Parietal - L Parietal
MyConnectome QB	429	4.327 ± 1.147	11 ± 4 [35.442]	0.126 ± 0.034	0.610 [0.45, 0.78]	L Frontal - L Frontal
MyConnectome QB	430	2.771 ± 1.107	74 ± 38 [51.995]	0.614 ± 0.175	0.982 [0.97, 0.99]	R Frontal - R Frontal
MyConnectome QB	431	1.423 ± 0.560	41 ± 16 [40.105]	0.599 ± 0.106	0.928 [0.87, 0.97]	L Frontal - L Frontal
MyConnectome QB	432	2.278 ± 0.999	96 ± 25 [26.122]	0.644 ± 0.104	0.985 [0.97, 0.99]	R Frontal - R Frontal
MyConnectome QB	433	1.918 ± 0.170	91 ± 10 [11.208]	0.813 ± 0.028	0.989 [0.98, 1.00]	R Parietal - R Parietal
MyConnectome QB	434	8.219 ± 1.058	3 ± 1 [44.881]	0.054 ± 0.044	0.793 [0.68, 0.89]	R Parietal - R Parietal
MyConnectome QB	435	4.174 ± 0.553	12 ± 5 [39.998]	0.240 ± 0.066	0.802 [0.68, 0.90]	L Parietal - L Parietal
MyConnectome QB	436	1.697 ± 0.564	62 ± 18 [29.604]	0.709 ± 0.065	0.984 [0.97, 0.99]	R Frontal - R Frontal
MyConnectome QB	437	1.977 ± 0.375	66 ± 20 [30.223]	0.553 ± 0.079	0.926 [0.87, 0.96]	L Frontal - L Parietal
MyConnectome QB	438	3.749 ± 0.878	8 ± 2 [25.458]	0.222 ± 0.058	0.645 [0.50, 0.80]	R Parietal - R Parietal
MyConnectome QB	439	2.703 ± 1.210	7 ± 4 [59.411]	0.269 ± 0.086	0.832 [0.73, 0.92]	R Frontal - R Frontal
MyConnectome QB	440	1.935 ± 0.626	12 ± 6 [50.361]	0.446 ± 0.113	0.913 [0.85, 0.96]	R Parietal - R Parietal
MyConnectome QB	441	3.112 ± 2.141	145 ± 54 [37.392]	0.557 ± 0.167	0.904 [0.83, 0.95]	R Occipital - R Occipital
MyConnectome QB	442	4.411 ± 1.326	14 ± 10 [74.034]	0.170 ± 0.079	0.427 [0.27, 0.63]	L Frontal - L Frontal
MyConnectome QB	443	3.886 ± 1.140	4 ± 2 [42.312]	0.110 ± 0.043	0.723 [0.58, 0.85]	L Parietal - L Parietal
MyConnectome QB	444	-	-	-	-	L Temporal - L Occipital
MyConnectome QB	445	2.656 ± 1.295	111 ± 35 [31.118]	0.612 ± 0.110	0.968 [0.94, 0.99]	R Frontal - R Frontal
MyConnectome QB	446	1.650 ± 0.827	23 ± 8 [36.066]	0.448 ± 0.076	0.936 [0.89, 0.97]	R Frontal - R Frontal
MyConnectome QB	447	3.668 ± 0.955	4 ± 2 [56.198]	0.099 ± 0.051	0.816 [0.71, 0.91]	R Frontal - R Frontal
MyConnectome QB	448	5.833 ± 1.876	19 ± 13 [71.521]	0.102 ± 0.054	0.345 [0.20, 0.55]	R Frontal - R Frontal
MyConnectome QB	449	-	-	-	-	L Frontal - L Parietal
MyConnectome QB	450	1.895 ± 1.107	33 ± 15 [46.289]	0.483 ± 0.104	0.892 [0.82, 0.95]	L Frontal - L Temporal
MyConnectome QB	451	2.601 ± 0.568	33 ± 15 [45.078]	0.565 ± 0.149	0.913 [0.85, 0.96]	R Parietal - R Parietal
MyConnectome QB	452	4.485 ± 1.425	5 ± 2 [49.926]	0.079 ± 0.042	0.706 [0.57, 0.84]	L Frontal - L Frontal
MyConnectome QB	453	2.549 ± 1.591	9 ± 4 [45.182]	0.216 ± 0.074	0.845 [0.75, 0.92]	Cerebellum
MyConnectome QB	454	3.874 ± 2.248	11 ± 5 [42.025]	0.122 ± 0.052	0.382 [0.23, 0.59]	L Frontal - L Cingulate
MyConnectome QB	455	5.716 ± 1.269	3 ± 2 [48.049]	0.063 ± 0.042	0.681 [0.54, 0.83]	R Frontal - R Frontal
MyConnectome QB	456	-	-	-	-	L Frontal - L Cingulate
MyConnectome QB	457	-	-	-	-	R Parietal - R Parietal
MyConnectome QB	458	2.189 ± 0.816	27 ± 13 [50.405]	0.554 ± 0.167	0.884 [0.79, 0.95]	L Occipital - L Occipital
MyConnectome QB	459	3.114 ± 0.546	11 ± 4 [34.188]	0.262 ± 0.057	0.909 [0.84, 0.96]	R Parietal - R Parietal
MyConnectome QB	460	-	-	-	-	L Frontal - L Frontal
MyConnectome QB	461	-	-	-	-	Cerebellum
MyConnectome QB	462	3.610 ± 0.851	4 ± 2 [38.937]	0.141 ± 0.054	0.646 [0.50, 0.80]	L Frontal - L Frontal
MyConnectome QB	463	-	-	-	-	L Frontal - L Frontal
MyConnectome QB	464	3.674 ± 1.008	4 ± 2 [45.878]	0.162 ± 0.056	0.307 [0.18, 0.51]	L Frontal - L Frontal
MyConnectome QB	465	3.165 ± 1.602	16 ± 9 [58.137]	0.262 ± 0.105	0.848 [0.76, 0.92]	L Frontal - L Frontal
MyConnectome QB	466	1.676 ± 0.417	29 ± 13 [44.208]	0.573 ± 0.097	0.949 [0.91, 0.98]	R Frontal - R Frontal
MyConnectome QB	467	4.984 ± 1.665	4 ± 2 [43.062]	0.059 ± 0.040	0.519 [0.37, 0.71]	L Parietal - L Parietal
MyConnectome QB	468	-	-	-	-	R Frontal - R Cingulate
MyConnectome QB	469	-	-	-	-	L Parietal - L Occipital
MyConnectome QB	470	5.029 ± 2.575	5 ± 3 [70.187]	0.086 ± 0.058	0.357 [0.22, 0.56]	L Frontal - L Frontal
MyConnectome QB	471	-	-	-	-	R Frontal - R Frontal
MyConnectome QB	472	-	-	-	-	L Frontal - L Frontal
MyConnectome QB	473	-	-	-	-	L Frontal - L Frontal
MyConnectome QB	474	-	-	-	-	R Parietal - R Parietal
MyConnectome QB	475	-	-	-	-	R Parietal - R Parietal
MyConnectome QB	476	-	-	-	-	R Occipital - R Occipital
MyConnectome QB	477	3.789 ± 1.919	4 ± 3 [69.437]	0.118 ± 0.084	0.575 [0.42, 0.75]	L Occipital - L Occipital
MyConnectome QB	478	-	-	-	-	L Frontal - L Frontal
MyConnectome QB	479	-	-	-	-	L Parietal - L Parietal
MyConnectome QB	480	-	-	-	-	L Frontal - L Temporal
MyConnectome QB	481	4.007 ± 1.547	5 ± 3 [59.301]	0.142 ± 0.080	0.506 [0.34, 0.70]	R Frontal - R Frontal
MyConnectome QB	482	-	-	-	-	L Frontal - L Frontal
MyConnectome QB	483	-	-	-	-	L Frontal - L Frontal
MyConnectome QB	484	2.473 ± 2.547	28 ± 16 [58.356]	0.450 ± 0.205	0.865 [0.77, 0.93]	L Parietal - L Parietal
MyConnectome QB	485	2.335 ± 1.064	23 ± 13 [55.437]	0.443 ± 0.188	0.874 [0.79, 0.94]	L Frontal - L Frontal
MyConnectome QB	486	-	-	-	-	R Parietal - R Parietal
MyConnectome QB	487	3.302 ± 1.771	10 ± 7 [66.935]	0.187 ± 0.110	0.889 [0.81, 0.95]	Cerebellum
MyConnectome QB	488	4.119 ± 1.714	9 ± 4 [41.464]	0.107 ± 0.040	0.442 [0.29, 0.64]	L Frontal - L Frontal
MyConnectome QB	489	-	-	-	-	L Occipital - L Occipital
MyConnectome QB	490	-	-	-	-	Cerebellum
MyConnectome QB	491	1.659 ± 0.607	21 ± 9 [43.976]	0.447 ± 0.076	0.934 [0.89, 0.97]	L Frontal - L Frontal
MyConnectome QB	492	-	-	-	-	L Frontal - L Cingulate
MyConnectome QB	493	3.959 ± 2.540	30 ± 14 [46.119]	0.212 ± 0.079	0.410 [0.26, 0.61]	L Parietal - L Parietal
MyConnectome QB	494	7.547 ± 4.665	30 ± 22 [74.662]	0.180 ± 0.152	0.372 [0.23, 0.58]	L Frontal - L Frontal
MyConnectome QB	495	4.007 ± 1.696	4 ± 2 [45.599]	0.093 ± 0.047	0.718 [0.58, 0.85]	R Frontal - R Parietal
MyConnectome QB	496	3.327 ± 1.816	10 ± 7 [65.093]	0.322 ± 0.117	0.531 [0.37, 0.72]	R Frontal - R Frontal
MyConnectome QB	497	-	-	-	-	R Frontal - R Frontal
MyConnectome QB	498	2.905 ± 1.353	5 ± 3 [54.432]	0.144 ± 0.078	0.831 [0.73, 0.91]	R Frontal - R Frontal
MyConnectome QB	499	5.147 ± 2.203	4 ± 3 [64.574]	0.083 ± 0.055	0.717 [0.58, 0.85]	L Occipital - L Occipital
HCP QB	0	2.599 ± 0.358	248 ± 78 [31.321]	0.756 ± 0.034	0.954 [0.91, 0.98]	R Frontal - R Parietal
HCP QB	1	3.220 ± 0.552	243 ± 73 [30.165]	0.792 ± 0.059	0.960 [0.92, 0.98]	L Frontal - L Frontal
HCP QB	2	2.868 ± 0.443	225 ± 117 [51.870]	0.719 ± 0.071	0.931 [0.87, 0.97]	L Frontal - L Frontal
HCP QB	3	2.746 ± 0.689	389 ± 181 [46.537]	0.662 ± 0.081	0.932 [0.86, 0.97]	R Frontal - R Temporal
HCP QB	4	2.400 ± 0.405	306 ± 59 [19.280]	0.839 ± 0.024	0.971 [0.95, 0.99]	R Frontal - R Frontal
HCP QB	5	3.118 ± 0.648	147 ± 97 [65.690]	0.513 ± 0.094	0.924 [0.86, 0.97]	L Occipital - L Occipital
HCP QB	6	3.860 ± 0.638	220 ± 92 [41.953]	0.593 ± 0.078	0.925 [0.86, 0.97]	R Frontal - R Frontal
HCP QB	7	4.131 ± 0.473	90 ± 48 [53.004]	0.439 ± 0.099	0.894 [0.81, 0.95]	L Parietal - L Parietal
HCP QB	8	2.838 ± 0.520	208 ± 127 [60.957]	0.604 ± 0.105	0.934 [0.87, 0.97]	L Frontal - L Frontal
HCP QB	9	3.165 ± 0.601	337 ± 79 [23.393]	0.819 ± 0.036	0.949 [0.90, 0.98]	R Frontal - R Frontal
HCP QB	10	2.339 ± 0.528	237 ± 127 [53.795]	0.655 ± 0.100	0.937 [0.89, 0.97]	L Parietal - L Parietal
HCP QB	11	3.058 ± 0.515	248 ± 69 [27.715]	0.627 ± 0.053	0.941 [0.88, 0.97]	L Parietal - L Parietal
HCP QB	12	3.471 ± 0.777	286 ± 116 [40.624]	0.687 ± 0.076	0.949 [0.90, 0.98]	R Occipital - R Occipital
HCP QB	13	2.484 ± 0.388	201 ± 37 [18.403]	0.818 ± 0.024	0.938 [0.88, 0.97]	L Frontal - L Frontal
HCP QB	14	3.253 ± 0.725	138 ± 69 [49.945]	0.529 ± 0.088	0.923 [0.85, 0.97]	L Frontal - L Frontal
HCP QB	15	2.741 ± 0.440	172 ± 90 [52.607]	0.728 ± 0.074	0.890 [0.80, 0.95]	R Frontal - R Frontal
HCP QB	16	3.607 ± 0.406	257 ± 99 [38.380]	0.646 ± 0.055	0.915 [0.83, 0.96]	R Parietal - R Parietal
HCP QB	17	2.370 ± 0.656	285 ± 115 [40.322]	0.637 ± 0.074	0.939 [0.88, 0.97]	L Parietal - L Parietal
HCP QB	18	3.032 ± 0.523	277 ± 138 [49.895]	0.648 ± 0.086	0.907 [0.82, 0.96]	L Frontal - L Parietal
HCP QB	19	2.794 ± 0.607	340 ± 82 [24.090]	0.639 ± 0.063	0.942 [0.88, 0.98]	R Temporal - R Temporal
HCP QB	20	2.702 ± 0.560	143 ± 80 [55.624]	0.614 ± 0.093	0.921 [0.86, 0.96]	L Frontal - L Frontal
HCP QB	21	2.736 ± 0.771	185 ± 83 [45.184]	0.613 ± 0.102	0.938 [0.87, 0.97]	R Frontal - R Frontal
HCP QB	22	3.672 ± 0.717	169 ± 84 [49.427]	0.567 ± 0.079	0.887 [0.79, 0.95]	R Parietal - R Parietal
HCP QB	23	3.686 ± 0.795	148 ± 80 [54.258]	0.527 ± 0.111	0.944 [0.90, 0.97]	L Temporal - L Temporal
HCP QB	24	3.418 ± 0.884	102 ± 43 [42.424]	0.507 ± 0.070	0.911 [0.83, 0.96]	R Frontal - R Frontal
HCP QB	25	2.557 ± 0.612	155 ± 90 [57.943]	0.594 ± 0.100	0.924 [0.85, 0.97]	L Frontal - L Frontal
HCP QB	26	2.875 ± 0.613	209 ± 134 [64.032]	0.636 ± 0.086	0.885 [0.77, 0.95]	L Frontal - L Frontal
HCP QB	27	2.975 ± 0.675	205 ± 107 [52.228]	0.602 ± 0.073	0.916 [0.83, 0.96]	L Frontal - L Frontal
HCP QB	28	2.814 ± 0.726	195 ± 104 [53.558]	0.633 ± 0.087	0.937 [0.88, 0.97]	L Parietal - L Parietal
HCP QB	29	4.682 ± 0.357	121 ± 61 [50.261]	0.563 ± 0.091	0.912 [0.83, 0.96]	R Parietal - R Temporal
HCP QB	30	2.530 ± 0.762	156 ± 72 [45.977]	0.568 ± 0.081	0.903 [0.82, 0.96]	R Occipital - R Occipital
HCP QB	31	2.724 ± 0.669	177 ± 96 [53.940]	0.627 ± 0.074	0.943 [0.89, 0.97]	R Temporal - R Temporal
HCP QB	32	2.752 ± 0.641	350 ± 120 [34.150]	0.654 ± 0.057	0.950 [0.90, 0.98]	L Frontal - L Parietal
HCP QB	33	2.627 ± 0.637	160 ± 81 [50.429]	0.585 ± 0.071	0.920 [0.83, 0.97]	R Occipital - R Occipital
HCP QB	34	2.384 ± 0.575	550 ± 167 [30.300]	0.849 ± 0.057	0.646 [0.43, 0.82]	R Temporal - R Temporal
HCP QB	35	2.567 ± 0.953	290 ± 94 [32.293]	0.644 ± 0.072	0.930 [0.85, 0.97]	L Occipital - L Occipital
HCP QB	36	2.405 ± 0.709	143 ± 61 [42.397]	0.537 ± 0.078	0.902 [0.82, 0.95]	L Frontal - L Frontal
HCP QB	37	2.299 ± 0.570	213 ± 87 [40.891]	0.654 ± 0.095	0.948 [0.90, 0.98]	L Frontal - L Frontal
HCP QB	38	2.685 ± 0.545	171 ± 100 [58.572]	0.584 ± 0.096	0.922 [0.85, 0.96]	R Frontal - R Frontal
HCP QB	39	3.483 ± 1.138	870 ± 320 [36.767]	0.815 ± 0.074	0.827 [0.68, 0.92]	L Parietal - L Parietal
HCP QB	40	2.486 ± 0.556	159 ± 53 [33.286]	0.646 ± 0.056	0.931 [0.87, 0.97]	L Parietal - L Parietal
HCP QB	41	3.592 ± 0.727	133 ± 66 [49.591]	0.511 ± 0.077	0.892 [0.79, 0.95]	R Parietal - R Parietal
HCP QB	42	2.952 ± 0.639	100 ± 41 [41.466]	0.563 ± 0.093	0.938 [0.89, 0.97]	Cerebellum
HCP QB	43	2.890 ± 0.663	204 ± 91 [44.579]	0.593 ± 0.073	0.925 [0.86, 0.97]	L Parietal - L Occipital
HCP QB	44	2.573 ± 0.776	290 ± 124 [42.685]	0.610 ± 0.083	0.949 [0.90, 0.98]	L Frontal - L Frontal
HCP QB	45	4.779 ± 0.834	144 ± 75 [51.775]	0.502 ± 0.116	0.931 [0.88, 0.97]	L Occipital - L Occipital
HCP QB	46	2.854 ± 0.527	118 ± 54 [45.649]	0.568 ± 0.088	0.924 [0.86, 0.96]	R Frontal - R Frontal
HCP QB	47	3.414 ± 0.745	225 ± 76 [33.667]	0.574 ± 0.092	0.929 [0.86, 0.97]	R Temporal - R Temporal
HCP QB	48	2.545 ± 0.490	173 ± 76 [43.766]	0.650 ± 0.067	0.941 [0.88, 0.97]	R Frontal - R Frontal
HCP QB	49	3.875 ± 0.856	152 ± 73 [47.920]	0.536 ± 0.094	0.915 [0.84, 0.96]	L Frontal - L Parietal
HCP QB	50	2.365 ± 0.603	311 ± 97 [31.290]	0.735 ± 0.056	0.955 [0.91, 0.98]	L Temporal - L Temporal
HCP QB	51	2.064 ± 0.633	239 ± 104 [43.631]	0.711 ± 0.084	0.897 [0.79, 0.95]	L Frontal - L Frontal
HCP QB	52	4.475 ± 0.867	100 ± 44 [43.990]	0.491 ± 0.078	0.921 [0.86, 0.96]	L Temporal - L Temporal
HCP QB	53	3.167 ± 0.658	259 ± 150 [57.875]	0.648 ± 0.097	0.910 [0.82, 0.96]	L Frontal - L Parietal
HCP QB	54	2.960 ± 0.761	199 ± 93 [46.589]	0.645 ± 0.112	0.916 [0.84, 0.96]	R Temporal - R Temporal
HCP QB	55	3.146 ± 0.770	127 ± 68 [53.428]	0.516 ± 0.085	0.920 [0.86, 0.96]	R Frontal - R Frontal
HCP QB	56	3.523 ± 0.737	175 ± 66 [37.797]	0.706 ± 0.077	0.931 [0.86, 0.97]	L Parietal - L Temporal
HCP QB	57	2.802 ± 0.485	189 ± 101 [53.481]	0.582 ± 0.083	0.955 [0.91, 0.98]	L Frontal - L Frontal
HCP QB	58	2.995 ± 0.394	193 ± 76 [39.290]	0.761 ± 0.065	0.949 [0.90, 0.98]	R Parietal - R Parietal
HCP QB	59	2.901 ± 0.908	348 ± 141 [40.441]	0.650 ± 0.076	0.938 [0.87, 0.97]	L Parietal - L Parietal
HCP QB	60	2.289 ± 0.409	114 ± 57 [49.839]	0.638 ± 0.076	0.905 [0.83, 0.96]	R Temporal - R Temporal
HCP QB	61	2.473 ± 0.772	303 ± 62 [20.394]	0.733 ± 0.052	0.957 [0.91, 0.98]	R Parietal - R Parietal
HCP QB	62	3.890 ± 0.554	103 ± 53 [51.703]	0.529 ± 0.089	0.901 [0.82, 0.95]	L Frontal - L Frontal
HCP QB	63	3.112 ± 0.688	167 ± 63 [37.707]	0.705 ± 0.058	0.912 [0.84, 0.96]	R Frontal - R Frontal
HCP QB	64	2.768 ± 0.536	270 ± 80 [29.420]	0.640 ± 0.047	0.913 [0.82, 0.96]	L Frontal - L Parietal
HCP QB	65	3.154 ± 0.548	119 ± 41 [34.710]	0.507 ± 0.087	0.933 [0.87, 0.97]	L Frontal - L Frontal
HCP QB	66	2.758 ± 0.409	144 ± 81 [55.955]	0.567 ± 0.108	0.919 [0.85, 0.96]	L Parietal - L Parietal
HCP QB	67	2.255 ± 0.510	256 ± 74 [29.043]	0.630 ± 0.061	0.927 [0.85, 0.97]	L Parietal - L Parietal
HCP QB	68	2.192 ± 0.433	127 ± 57 [45.045]	0.577 ± 0.049	0.942 [0.89, 0.97]	L Frontal - L Frontal
HCP QB	69	3.198 ± 0.711	221 ± 62 [28.096]	0.709 ± 0.055	0.910 [0.82, 0.96]	L Parietal - L Parietal
HCP QB	70	3.144 ± 0.556	195 ± 68 [35.120]	0.650 ± 0.070	0.931 [0.87, 0.97]	R Parietal - R Parietal
HCP QB	71	3.474 ± 0.825	168 ± 81 [48.266]	0.612 ± 0.081	0.935 [0.88, 0.97]	L Temporal - L Temporal
HCP QB	72	2.920 ± 1.016	153 ± 68 [44.280]	0.629 ± 0.083	0.919 [0.84, 0.96]	L Parietal - L Parietal
HCP QB	73	2.934 ± 0.765	179 ± 69 [38.720]	0.672 ± 0.063	0.929 [0.86, 0.97]	L Parietal - L Parietal
HCP QB	74	2.436 ± 0.892	301 ± 144 [48.048]	0.609 ± 0.072	0.951 [0.90, 0.98]	R Occipital - R Occipital
HCP QB	75	2.767 ± 0.758	243 ± 89 [36.743]	0.667 ± 0.080	0.855 [0.75, 0.93]	R Parietal - R Parietal
HCP QB	76	2.757 ± 0.671	214 ± 83 [38.881]	0.618 ± 0.093	0.935 [0.87, 0.97]	R Frontal - R Parietal
HCP QB	77	2.831 ± 0.678	187 ± 93 [49.569]	0.589 ± 0.082	0.932 [0.87, 0.97]	L Parietal - L Parietal
HCP QB	78	3.133 ± 0.492	164 ± 39 [23.689]	0.690 ± 0.045	0.912 [0.83, 0.96]	R Frontal - R Frontal
HCP QB	79	3.230 ± 0.779	417 ± 145 [34.843]	0.659 ± 0.079	0.954 [0.91, 0.98]	L Frontal - L Frontal
HCP QB	80	2.610 ± 0.507	166 ± 52 [31.562]	0.624 ± 0.074	0.916 [0.83, 0.96]	R Frontal - R Parietal
HCP QB	81	2.872 ± 0.764	213 ± 79 [37.178]	0.598 ± 0.091	0.947 [0.90, 0.98]	L Parietal - L Parietal
HCP QB	82	2.799 ± 0.514	216 ± 90 [41.610]	0.617 ± 0.079	0.931 [0.86, 0.97]	L Frontal - L Parietal
HCP QB	83	2.614 ± 0.787	131 ± 57 [43.388]	0.518 ± 0.081	0.927 [0.86, 0.97]	L Frontal - L Frontal
HCP QB	84	2.398 ± 0.513	206 ± 70 [33.908]	0.709 ± 0.087	0.929 [0.85, 0.97]	R Frontal - R Frontal
HCP QB	85	6.601 ± 1.060	122 ± 51 [41.868]	0.561 ± 0.068	0.907 [0.83, 0.96]	L Parietal - L Cingulate
HCP QB	86	2.648 ± 0.521	161 ± 67 [41.295]	0.602 ± 0.095	0.922 [0.85, 0.97]	L Parietal - L Parietal
HCP QB	87	5.264 ± 1.638	214 ± 95 [44.562]	0.577 ± 0.066	0.856 [0.75, 0.93]	L Frontal - L Frontal
HCP QB	88	2.180 ± 0.612	133 ± 70 [52.661]	0.577 ± 0.095	0.921 [0.85, 0.96]	R Parietal - R Parietal
HCP QB	89	2.362 ± 0.316	129 ± 42 [32.356]	0.747 ± 0.046	0.947 [0.90, 0.98]	R Parietal - R Parietal
HCP QB	90	3.312 ± 0.978	115 ± 60 [52.344]	0.510 ± 0.106	0.902 [0.83, 0.95]	R Frontal - R Frontal
HCP QB	91	2.649 ± 0.539	278 ± 172 [61.782]	0.595 ± 0.106	0.947 [0.90, 0.98]	L Frontal - L Frontal
HCP QB	92	2.454 ± 0.709	261 ± 101 [38.806]	0.595 ± 0.093	0.947 [0.89, 0.98]	L Frontal - L Frontal
HCP QB	93	2.303 ± 0.478	209 ± 126 [60.297]	0.620 ± 0.091	0.925 [0.85, 0.97]	R Parietal - R Parietal
HCP QB	94	2.101 ± 0.670	175 ± 64 [36.555]	0.691 ± 0.077	0.914 [0.84, 0.96]	L Parietal - L Parietal
HCP QB	95	3.040 ± 0.559	203 ± 109 [53.844]	0.600 ± 0.107	0.943 [0.89, 0.97]	R Parietal - R Temporal
HCP QB	96	2.591 ± 0.810	183 ± 102 [55.484]	0.612 ± 0.093	0.946 [0.89, 0.98]	R Parietal - R Parietal
HCP QB	97	2.228 ± 0.697	177 ± 61 [34.408]	0.689 ± 0.080	0.951 [0.90, 0.98]	R Frontal - R Frontal
HCP QB	98	2.507 ± 0.561	188 ± 87 [46.283]	0.624 ± 0.098	0.947 [0.90, 0.98]	L Temporal - L Temporal
HCP QB	99	3.066 ± 0.644	51 ± 29 [56.364]	0.343 ± 0.090	0.909 [0.84, 0.96]	L Parietal - L Parietal
HCP QB	100	3.673 ± 1.692	475 ± 218 [45.965]	0.575 ± 0.092	0.886 [0.76, 0.95]	L Temporal - L Temporal
HCP QB	101	2.381 ± 0.532	149 ± 64 [42.801]	0.622 ± 0.063	0.883 [0.77, 0.95]	L Temporal - L Temporal
HCP QB	102	3.750 ± 0.755	80 ± 60 [75.197]	0.472 ± 0.144	0.897 [0.80, 0.95]	R Frontal - R Frontal
HCP QB	103	2.384 ± 0.441	249 ± 69 [27.760]	0.612 ± 0.042	0.953 [0.90, 0.98]	R Frontal - R Frontal
HCP QB	104	2.172 ± 0.676	117 ± 61 [52.661]	0.586 ± 0.103	0.924 [0.85, 0.97]	L Parietal - L Parietal
HCP QB	105	2.028 ± 0.232	112 ± 37 [33.260]	0.690 ± 0.098	0.924 [0.86, 0.97]	L Frontal - L Frontal
HCP QB	106	3.421 ± 0.550	90 ± 51 [56.470]	0.524 ± 0.088	0.915 [0.84, 0.96]	L Frontal - L Parietal
HCP QB	107	2.174 ± 0.651	335 ± 104 [30.944]	0.642 ± 0.074	0.950 [0.90, 0.98]	R Frontal - R Frontal
HCP QB	108	3.075 ± 1.084	255 ± 114 [44.489]	0.633 ± 0.111	0.892 [0.78, 0.95]	R Frontal - R Frontal
HCP QB	109	3.732 ± 0.699	79 ± 30 [37.942]	0.568 ± 0.075	0.913 [0.84, 0.96]	R Parietal - R Parietal
HCP QB	110	2.733 ± 0.703	263 ± 127 [48.120]	0.567 ± 0.089	0.924 [0.85, 0.97]	R Frontal - R Frontal
HCP QB	111	3.117 ± 1.151	326 ± 99 [30.423]	0.597 ± 0.072	0.903 [0.80, 0.96]	L Parietal - L Parietal
HCP QB	112	2.814 ± 0.491	142 ± 72 [50.367]	0.628 ± 0.096	0.935 [0.87, 0.97]	R Temporal - R Temporal
HCP QB	113	3.194 ± 0.544	126 ± 67 [52.918]	0.540 ± 0.092	0.918 [0.85, 0.96]	R Frontal - R Frontal
HCP QB	114	3.377 ± 1.210	423 ± 140 [33.014]	0.650 ± 0.077	0.928 [0.86, 0.97]	L Frontal - L Parietal
HCP QB	115	3.365 ± 0.450	82 ± 29 [35.136]	0.594 ± 0.053	0.934 [0.87, 0.97]	R Parietal - R Parietal
HCP QB	116	3.160 ± 0.864	64 ± 26 [41.128]	0.362 ± 0.090	0.891 [0.80, 0.95]	R Frontal - R Parietal
HCP QB	117	2.144 ± 0.517	165 ± 52 [31.712]	0.690 ± 0.065	0.861 [0.75, 0.94]	L Frontal - L Frontal
HCP QB	118	3.716 ± 0.480	76 ± 38 [49.506]	0.504 ± 0.127	0.907 [0.84, 0.96]	L Frontal - L Frontal
HCP QB	119	2.923 ± 1.181	397 ± 220 [55.471]	0.617 ± 0.106	0.915 [0.82, 0.96]	L Frontal - L Frontal
HCP QB	120	2.507 ± 0.486	132 ± 51 [38.898]	0.529 ± 0.084	0.927 [0.86, 0.97]	L Parietal - L Parietal
HCP QB	121	2.896 ± 0.721	141 ± 74 [52.156]	0.508 ± 0.094	0.933 [0.88, 0.97]	L Frontal - L Frontal
HCP QB	122	2.836 ± 0.756	48 ± 32 [67.382]	0.379 ± 0.111	0.895 [0.82, 0.95]	R Parietal - R Parietal
HCP QB	123	2.653 ± 0.530	96 ± 49 [50.695]	0.553 ± 0.087	0.891 [0.81, 0.95]	L Parietal - L Occipital
HCP QB	124	4.051 ± 0.679	106 ± 60 [56.104]	0.479 ± 0.110	0.902 [0.83, 0.95]	L Parietal - L Parietal
HCP QB	125	2.587 ± 0.816	307 ± 123 [39.952]	0.630 ± 0.084	0.935 [0.87, 0.97]	R Temporal - R Temporal
HCP QB	126	2.819 ± 0.652	164 ± 47 [28.798]	0.609 ± 0.059	0.898 [0.82, 0.95]	R Occipital - R Occipital
HCP QB	127	2.742 ± 0.495	115 ± 59 [51.106]	0.568 ± 0.096	0.904 [0.82, 0.96]	R Parietal - R Parietal
HCP QB	128	2.759 ± 0.576	131 ± 85 [65.345]	0.571 ± 0.115	0.897 [0.81, 0.95]	L Parietal - L Parietal
HCP QB	129	3.265 ± 0.627	95 ± 33 [34.897]	0.593 ± 0.078	0.874 [0.76, 0.94]	R Frontal - R Frontal
HCP QB	130	4.016 ± 0.821	75 ± 35 [46.576]	0.485 ± 0.080	0.912 [0.84, 0.96]	R Frontal - R Parietal
HCP QB	131	2.900 ± 0.846	80 ± 34 [42.171]	0.466 ± 0.092	0.919 [0.85, 0.96]	L Parietal - L Temporal
HCP QB	132	3.005 ± 0.638	145 ± 57 [39.587]	0.700 ± 0.063	0.924 [0.85, 0.97]	L Frontal - L Frontal
HCP QB	133	2.920 ± 0.498	135 ± 64 [46.984]	0.565 ± 0.108	0.813 [0.68, 0.91]	L Temporal - L Temporal
HCP QB	134	3.189 ± 0.810	122 ± 59 [48.726]	0.575 ± 0.089	0.925 [0.85, 0.97]	R Parietal - R Parietal
HCP QB	135	2.668 ± 0.466	180 ± 103 [57.480]	0.566 ± 0.089	0.922 [0.85, 0.97]	R Frontal - R Frontal
HCP QB	136	3.012 ± 0.959	144 ± 76 [52.571]	0.522 ± 0.094	0.943 [0.90, 0.97]	L Frontal - L Parietal
HCP QB	137	3.322 ± 0.911	117 ± 84 [71.914]	0.466 ± 0.116	0.923 [0.85, 0.97]	R Frontal - R Frontal
HCP QB	138	2.316 ± 0.558	99 ± 46 [45.873]	0.560 ± 0.086	0.924 [0.86, 0.97]	R Frontal - R Frontal
HCP QB	139	2.976 ± 0.630	118 ± 64 [54.524]	0.541 ± 0.098	0.920 [0.86, 0.96]	L Occipital - L Occipital
HCP QB	140	3.633 ± 0.674	73 ± 38 [51.653]	0.464 ± 0.074	0.937 [0.89, 0.97]	R Parietal - R Parietal
HCP QB	141	2.978 ± 0.685	188 ± 71 [37.603]	0.583 ± 0.075	0.921 [0.83, 0.97]	L Frontal - L Frontal
HCP QB	142	3.105 ± 0.740	88 ± 57 [64.547]	0.558 ± 0.131	0.906 [0.82, 0.96]	L Parietal - L Parietal
HCP QB	143	2.166 ± 0.602	204 ± 47 [23.304]	0.561 ± 0.062	0.933 [0.87, 0.97]	R Frontal - R Frontal
HCP QB	144	2.252 ± 0.388	84 ± 25 [29.546]	0.586 ± 0.063	0.927 [0.87, 0.97]	R Frontal - R Frontal
HCP QB	145	2.494 ± 0.458	129 ± 62 [47.969]	0.575 ± 0.085	0.917 [0.84, 0.96]	Cerebellum
HCP QB	146	2.214 ± 0.571	187 ± 83 [44.164]	0.609 ± 0.101	0.910 [0.82, 0.96]	L Frontal - L Frontal
HCP QB	147	2.349 ± 0.651	188 ± 57 [30.269]	0.630 ± 0.062	0.940 [0.88, 0.97]	L Frontal - L Frontal
HCP QB	148	2.718 ± 0.586	112 ± 46 [40.978]	0.551 ± 0.085	0.928 [0.87, 0.97]	L Frontal - L Frontal
HCP QB	149	2.632 ± 1.049	185 ± 97 [52.625]	0.541 ± 0.081	0.879 [0.76, 0.95]	L Parietal - L Parietal
HCP QB	150	2.755 ± 1.027	114 ± 71 [62.383]	0.519 ± 0.140	0.892 [0.78, 0.95]	R Parietal - R Parietal
HCP QB	151	2.713 ± 0.748	254 ± 98 [38.787]	0.584 ± 0.094	0.914 [0.83, 0.96]	R Parietal - R Parietal
HCP QB	152	3.265 ± 0.895	71 ± 27 [38.170]	0.538 ± 0.084	0.920 [0.86, 0.96]	L Frontal - L Frontal
HCP QB	153	3.005 ± 0.454	94 ± 36 [38.537]	0.527 ± 0.081	0.877 [0.79, 0.94]	R Frontal - R Frontal
HCP QB	154	2.737 ± 0.955	187 ± 120 [64.244]	0.587 ± 0.112	0.947 [0.89, 0.98]	R Frontal - R Frontal
HCP QB	155	2.546 ± 0.627	190 ± 74 [39.208]	0.607 ± 0.083	0.928 [0.85, 0.97]	R Frontal - R Frontal
HCP QB	156	2.771 ± 0.567	110 ± 68 [61.406]	0.507 ± 0.126	0.907 [0.84, 0.96]	R Frontal - R Frontal
HCP QB	157	2.374 ± 0.643	166 ± 81 [48.902]	0.501 ± 0.088	0.918 [0.83, 0.96]	R Frontal - R Frontal
HCP QB	158	2.443 ± 0.554	210 ± 88 [42.087]	0.579 ± 0.078	0.925 [0.85, 0.97]	L Frontal - L Parietal
HCP QB	159	3.591 ± 0.781	60 ± 40 [66.440]	0.416 ± 0.125	0.886 [0.80, 0.95]	L Frontal - L Frontal
HCP QB	160	2.369 ± 0.589	118 ± 63 [53.200]	0.549 ± 0.096	0.909 [0.82, 0.96]	L Frontal - L Frontal
HCP QB	161	3.098 ± 0.901	62 ± 37 [59.442]	0.432 ± 0.109	0.894 [0.80, 0.95]	L Frontal - L Frontal
HCP QB	162	2.463 ± 0.565	96 ± 36 [37.089]	0.534 ± 0.082	0.890 [0.79, 0.95]	L Frontal - L Frontal
HCP QB	163	2.579 ± 0.687	217 ± 112 [51.697]	0.546 ± 0.106	0.936 [0.87, 0.97]	L Frontal - L Frontal
HCP QB	164	2.042 ± 0.423	176 ± 75 [42.939]	0.675 ± 0.077	0.947 [0.89, 0.98]	L Frontal - L Frontal
HCP QB	165	2.450 ± 0.501	89 ± 30 [34.082]	0.652 ± 0.100	0.959 [0.92, 0.98]	R Frontal - R Parietal
HCP QB	166	2.397 ± 0.333	110 ± 38 [34.307]	0.692 ± 0.049	0.939 [0.89, 0.97]	R Occipital - R Occipital
HCP QB	167	6.436 ± 0.594	44 ± 31 [70.395]	0.329 ± 0.105	0.904 [0.83, 0.96]	R Frontal - R Frontal
HCP QB	168	2.353 ± 0.530	307 ± 110 [35.848]	0.649 ± 0.054	0.950 [0.90, 0.98]	L Parietal - L Parietal
HCP QB	169	2.355 ± 0.719	122 ± 75 [61.495]	0.541 ± 0.090	0.937 [0.88, 0.97]	R Parietal - R Parietal
HCP QB	170	2.300 ± 0.602	192 ± 105 [54.719]	0.566 ± 0.090	0.903 [0.81, 0.96]	R Frontal - R Parietal
HCP QB	171	2.222 ± 0.353	93 ± 24 [25.962]	0.533 ± 0.050	0.904 [0.82, 0.96]	R Frontal - R Frontal
HCP QB	172	4.777 ± 0.680	46 ± 21 [46.626]	0.485 ± 0.089	0.876 [0.79, 0.94]	L Frontal - L Frontal
HCP QB	173	2.361 ± 0.854	169 ± 77 [45.500]	0.529 ± 0.093	0.921 [0.85, 0.96]	R Parietal - R Parietal
HCP QB	174	2.216 ± 0.413	165 ± 57 [34.386]	0.671 ± 0.083	0.882 [0.78, 0.95]	R Frontal - R Frontal
HCP QB	175	2.360 ± 0.400	115 ± 49 [42.560]	0.579 ± 0.118	0.917 [0.85, 0.96]	L Frontal - L Frontal
HCP QB	176	3.187 ± 0.649	149 ± 47 [31.874]	0.727 ± 0.073	0.939 [0.89, 0.97]	R Parietal - R Parietal
HCP QB	177	3.144 ± 0.881	78 ± 37 [47.659]	0.498 ± 0.087	0.881 [0.77, 0.95]	L Frontal - L Frontal
HCP QB	178	4.065 ± 0.879	38 ± 30 [79.840]	0.250 ± 0.100	0.817 [0.70, 0.91]	R Parietal - R Parietal
HCP QB	179	2.727 ± 1.428	355 ± 161 [45.214]	0.633 ± 0.114	0.913 [0.82, 0.96]	R Frontal - R Frontal
HCP QB	180	3.553 ± 0.984	202 ± 105 [51.826]	0.565 ± 0.079	0.923 [0.85, 0.97]	L Parietal - L Parietal
HCP QB	181	2.660 ± 0.670	63 ± 36 [57.173]	0.562 ± 0.081	0.919 [0.85, 0.96]	L Temporal - L Temporal
HCP QB	182	2.231 ± 0.906	353 ± 170 [48.166]	0.653 ± 0.094	0.926 [0.84, 0.97]	R Frontal - R Frontal
HCP QB	183	2.234 ± 0.600	219 ± 38 [17.303]	0.721 ± 0.047	0.943 [0.88, 0.98]	R Parietal - R Parietal
HCP QB	184	2.727 ± 0.626	138 ± 68 [48.965]	0.521 ± 0.083	0.893 [0.81, 0.95]	R Frontal - R Frontal
HCP QB	185	3.228 ± 0.936	160 ± 96 [59.938]	0.565 ± 0.105	0.907 [0.82, 0.96]	L Frontal - L Frontal
HCP QB	186	3.053 ± 1.357	221 ± 99 [44.919]	0.524 ± 0.115	0.839 [0.68, 0.93]	R Parietal - R Parietal
HCP QB	187	2.226 ± 0.478	124 ± 43 [34.857]	0.706 ± 0.079	0.929 [0.86, 0.97]	L Frontal - L Parietal
HCP QB	188	3.372 ± 0.817	246 ± 76 [30.646]	0.625 ± 0.044	0.945 [0.89, 0.98]	R Parietal - R Parietal
HCP QB	189	2.849 ± 0.573	126 ± 54 [42.507]	0.667 ± 0.105	0.943 [0.89, 0.97]	R Frontal - R Frontal
HCP QB	190	2.316 ± 0.478	252 ± 75 [29.721]	0.651 ± 0.048	0.943 [0.88, 0.98]	L Occipital - L Occipital
HCP QB	191	2.738 ± 0.604	128 ± 71 [55.163]	0.552 ± 0.080	0.927 [0.87, 0.97]	R Frontal - R Parietal
HCP QB	192	3.879 ± 0.543	106 ± 58 [55.006]	0.530 ± 0.115	0.886 [0.79, 0.95]	R Frontal - R Frontal
HCP QB	193	2.662 ± 0.493	96 ± 59 [61.260]	0.533 ± 0.109	0.909 [0.84, 0.96]	R Frontal - R Frontal
HCP QB	194	3.011 ± 0.773	94 ± 56 [59.836]	0.462 ± 0.110	0.946 [0.90, 0.98]	R Frontal - R Frontal
HCP QB	195	2.634 ± 0.587	98 ± 36 [36.402]	0.479 ± 0.073	0.863 [0.74, 0.94]	R Frontal - R Frontal
HCP QB	196	2.794 ± 0.637	114 ± 66 [58.147]	0.625 ± 0.084	0.910 [0.83, 0.96]	R Parietal - R Parietal
HCP QB	197	2.580 ± 0.521	123 ± 62 [50.628]	0.599 ± 0.092	0.935 [0.87, 0.97]	R Frontal - R Frontal
HCP QB	198	2.457 ± 0.693	148 ± 66 [44.727]	0.540 ± 0.096	0.913 [0.82, 0.96]	L Frontal - L Frontal
HCP QB	199	2.476 ± 1.059	80 ± 39 [48.218]	0.575 ± 0.105	0.873 [0.76, 0.94]	L Frontal - L Frontal
HCP QB	200	5.095 ± 0.366	54 ± 22 [40.428]	0.512 ± 0.069	0.895 [0.80, 0.95]	L Parietal - L Parietal
HCP QB	201	3.677 ± 0.683	51 ± 26 [50.297]	0.433 ± 0.108	0.903 [0.82, 0.96]	R Frontal - R Frontal
HCP QB	202	3.005 ± 0.459	88 ± 27 [30.761]	0.622 ± 0.093	0.927 [0.87, 0.97]	R Frontal - R Parietal
HCP QB	203	3.761 ± 1.606	368 ± 119 [32.461]	0.629 ± 0.077	0.940 [0.88, 0.97]	R Frontal - R Parietal
HCP QB	204	2.737 ± 0.769	310 ± 132 [42.485]	0.588 ± 0.116	0.950 [0.90, 0.98]	R Frontal - R Frontal
HCP QB	205	2.474 ± 0.616	159 ± 82 [51.604]	0.566 ± 0.102	0.880 [0.78, 0.94]	R Parietal - R Parietal
HCP QB	206	3.139 ± 0.914	103 ± 43 [41.438]	0.563 ± 0.073	0.933 [0.88, 0.97]	L Frontal - L Parietal
HCP QB	207	2.731 ± 0.429	57 ± 17 [29.278]	0.537 ± 0.076	0.920 [0.86, 0.96]	R Parietal - R Parietal
HCP QB	208	2.537 ± 0.658	344 ± 144 [41.932]	0.655 ± 0.056	0.954 [0.91, 0.98]	L Parietal - L Temporal
HCP QB	209	2.662 ± 0.772	110 ± 60 [54.840]	0.554 ± 0.105	0.832 [0.68, 0.92]	L Parietal - L Parietal
HCP QB	210	3.295 ± 0.686	78 ± 36 [46.390]	0.548 ± 0.073	0.901 [0.81, 0.96]	L Parietal - L Parietal
HCP QB	211	2.691 ± 0.537	115 ± 24 [21.177]	0.632 ± 0.059	0.916 [0.84, 0.96]	R Parietal - R Parietal
HCP QB	212	2.435 ± 0.440	65 ± 18 [26.849]	0.612 ± 0.055	0.930 [0.87, 0.97]	R Parietal - R Parietal
HCP QB	213	2.713 ± 0.815	167 ± 72 [43.046]	0.556 ± 0.081	0.931 [0.86, 0.97]	R Frontal - R Frontal
HCP QB	214	3.380 ± 0.614	89 ± 68 [76.166]	0.451 ± 0.133	0.865 [0.75, 0.94]	L Parietal - L Parietal
HCP QB	215	2.289 ± 0.638	266 ± 119 [44.919]	0.636 ± 0.084	0.910 [0.83, 0.96]	L Frontal - L Frontal
HCP QB	216	2.681 ± 0.915	261 ± 111 [42.598]	0.595 ± 0.101	0.913 [0.82, 0.96]	L Frontal - L Frontal
HCP QB	217	2.305 ± 0.492	349 ± 138 [39.416]	0.665 ± 0.065	0.951 [0.90, 0.98]	R Frontal - R Parietal
HCP QB	218	2.594 ± 1.035	95 ± 26 [27.763]	0.543 ± 0.062	0.900 [0.81, 0.96]	R Frontal - R Frontal
HCP QB	219	3.394 ± 0.509	92 ± 32 [35.090]	0.558 ± 0.088	0.882 [0.78, 0.95]	R Parietal - R Parietal
HCP QB	220	2.876 ± 0.846	153 ± 135 [88.475]	0.516 ± 0.121	0.931 [0.87, 0.97]	L Parietal - L Parietal
HCP QB	221	3.294 ± 1.045	56 ± 36 [64.578]	0.411 ± 0.097	0.876 [0.78, 0.94]	L Parietal - L Parietal
HCP QB	222	5.175 ± 2.470	337 ± 215 [63.745]	0.502 ± 0.157	0.726 [0.53, 0.87]	Cerebellum
HCP QB	223	2.658 ± 0.722	186 ± 93 [50.240]	0.586 ± 0.081	0.913 [0.83, 0.96]	L Frontal - L Parietal
HCP QB	224	2.396 ± 0.637	122 ± 52 [43.000]	0.554 ± 0.070	0.922 [0.86, 0.96]	L Frontal - L Parietal
HCP QB	225	2.256 ± 0.535	151 ± 66 [43.504]	0.609 ± 0.099	0.924 [0.85, 0.97]	R Frontal - R Parietal
HCP QB	226	2.286 ± 0.798	71 ± 33 [46.672]	0.423 ± 0.117	0.898 [0.81, 0.95]	R Parietal - R Temporal
HCP QB	227	3.558 ± 0.842	73 ± 40 [54.650]	0.525 ± 0.094	0.817 [0.69, 0.91]	L Temporal - L Temporal
HCP QB	228	2.615 ± 0.420	160 ± 84 [52.827]	0.601 ± 0.069	0.904 [0.82, 0.96]	R Parietal - R Temporal
HCP QB	229	3.254 ± 0.711	215 ± 104 [48.250]	0.647 ± 0.060	0.936 [0.87, 0.97]	R Occipital - R Occipital
HCP QB	230	2.704 ± 0.844	66 ± 34 [51.267]	0.468 ± 0.100	0.848 [0.71, 0.93]	L Frontal - L Frontal
HCP QB	231	2.640 ± 0.522	131 ± 71 [54.672]	0.637 ± 0.131	0.913 [0.84, 0.96]	L Parietal - L Parietal
HCP QB	232	2.819 ± 0.390	153 ± 55 [35.830]	0.735 ± 0.061	0.956 [0.92, 0.98]	R Parietal - R Parietal
HCP QB	233	2.247 ± 0.533	277 ± 104 [37.435]	0.662 ± 0.057	0.925 [0.85, 0.97]	Cerebellum
HCP QB	234	2.565 ± 0.641	98 ± 34 [34.565]	0.620 ± 0.058	0.923 [0.86, 0.96]	L Parietal - L Parietal
HCP QB	235	3.083 ± 0.777	305 ± 97 [31.750]	0.589 ± 0.068	0.911 [0.82, 0.96]	R Frontal - R Frontal
HCP QB	236	2.604 ± 0.655	236 ± 101 [42.940]	0.633 ± 0.106	0.868 [0.74, 0.94]	L Frontal - L Frontal
HCP QB	237	3.175 ± 1.490	234 ± 100 [42.776]	0.536 ± 0.085	0.860 [0.71, 0.94]	R Parietal - R Temporal
HCP QB	238	2.896 ± 0.933	30 ± 18 [61.019]	0.361 ± 0.112	0.855 [0.75, 0.93]	L Frontal - L Frontal
HCP QB	239	2.263 ± 0.324	188 ± 65 [34.477]	0.606 ± 0.053	0.959 [0.91, 0.98]	R Frontal - R Frontal
HCP QB	240	2.441 ± 0.777	114 ± 55 [48.361]	0.534 ± 0.110	0.895 [0.79, 0.95]	L Frontal - L Frontal
HCP QB	241	2.895 ± 0.799	206 ± 161 [78.147]	0.547 ± 0.126	0.939 [0.88, 0.97]	R Parietal - R Parietal
HCP QB	242	3.189 ± 0.800	45 ± 15 [33.331]	0.476 ± 0.079	0.890 [0.79, 0.95]	R Parietal - R Parietal
HCP QB	243	2.475 ± 0.528	169 ± 60 [35.682]	0.549 ± 0.079	0.913 [0.84, 0.96]	L Frontal - L Parietal
HCP QB	244	2.618 ± 0.358	108 ± 44 [41.052]	0.640 ± 0.079	0.870 [0.78, 0.94]	R Frontal - R Parietal
HCP QB	245	2.619 ± 0.607	136 ± 64 [47.410]	0.570 ± 0.105	0.875 [0.77, 0.94]	R Temporal - R Temporal
HCP QB	246	2.648 ± 0.893	157 ± 72 [45.485]	0.579 ± 0.065	0.914 [0.83, 0.96]	Cerebellum
HCP QB	247	2.745 ± 0.509	138 ± 63 [45.784]	0.629 ± 0.109	0.946 [0.90, 0.97]	R Parietal - R Parietal
HCP QB	248	3.568 ± 0.526	76 ± 28 [36.760]	0.537 ± 0.066	0.943 [0.90, 0.97]	R Frontal - R Frontal
HCP QB	249	3.394 ± 1.189	238 ± 148 [61.978]	0.603 ± 0.127	0.939 [0.88, 0.97]	R Parietal - R Parietal
HCP QB	250	2.927 ± 0.572	59 ± 22 [36.617]	0.500 ± 0.077	0.862 [0.75, 0.94]	L Parietal - L Parietal
HCP QB	251	2.614 ± 0.562	146 ± 45 [30.638]	0.626 ± 0.071	0.922 [0.85, 0.97]	L Frontal - L Frontal
HCP QB	252	2.633 ± 0.453	186 ± 89 [48.009]	0.635 ± 0.104	0.904 [0.82, 0.96]	R Occipital - R Occipital
HCP QB	253	3.337 ± 0.873	138 ± 107 [77.295]	0.508 ± 0.135	0.900 [0.81, 0.95]	R Parietal - R Parietal
HCP QB	254	2.596 ± 0.816	87 ± 39 [44.521]	0.515 ± 0.093	0.933 [0.88, 0.97]	R Frontal - R Frontal
HCP QB	255	2.500 ± 0.521	112 ± 70 [62.772]	0.555 ± 0.107	0.886 [0.79, 0.95]	R Frontal - R Frontal
HCP QB	256	2.668 ± 0.664	22 ± 12 [56.302]	0.321 ± 0.113	0.839 [0.73, 0.92]	L Frontal - L Frontal
HCP QB	257	3.346 ± 1.004	134 ± 51 [38.168]	0.511 ± 0.102	0.905 [0.81, 0.96]	L Temporal - L Temporal
HCP QB	258	2.456 ± 0.451	100 ± 47 [47.371]	0.574 ± 0.121	0.931 [0.88, 0.97]	R Frontal - R Parietal
HCP QB	259	2.962 ± 1.032	295 ± 113 [38.375]	0.644 ± 0.094	0.921 [0.83, 0.97]	R Parietal - R Parietal
HCP QB	260	2.830 ± 1.045	149 ± 104 [69.925]	0.526 ± 0.140	0.907 [0.82, 0.96]	L Frontal - L Frontal
HCP QB	261	2.209 ± 0.509	198 ± 59 [29.759]	0.603 ± 0.063	0.948 [0.90, 0.98]	R Frontal - R Parietal
HCP QB	262	2.532 ± 0.691	51 ± 25 [49.211]	0.446 ± 0.082	0.837 [0.70, 0.92]	R Frontal - R Frontal
HCP QB	263	2.898 ± 0.809	211 ± 86 [40.988]	0.575 ± 0.066	0.828 [0.68, 0.92]	Cerebellum
HCP QB	264	3.111 ± 0.715	62 ± 41 [65.849]	0.471 ± 0.097	0.893 [0.81, 0.95]	L Parietal - L Parietal
HCP QB	265	2.415 ± 0.616	342 ± 145 [42.304]	0.636 ± 0.100	0.787 [0.60, 0.90]	R Frontal - R Frontal
HCP QB	266	3.066 ± 1.293	229 ± 78 [34.281]	0.583 ± 0.087	0.754 [0.58, 0.88]	L Frontal - L Frontal
HCP QB	267	2.719 ± 0.711	107 ± 64 [59.857]	0.591 ± 0.128	0.877 [0.77, 0.94]	R Frontal - R Frontal
HCP QB	268	3.270 ± 0.397	98 ± 47 [48.488]	0.675 ± 0.078	0.918 [0.83, 0.96]	L Parietal - L Parietal
HCP QB	269	2.766 ± 0.716	108 ± 41 [37.867]	0.465 ± 0.062	0.944 [0.89, 0.97]	R Parietal - R Parietal
HCP QB	270	2.714 ± 0.649	92 ± 57 [61.413]	0.539 ± 0.135	0.932 [0.88, 0.97]	R Frontal - R Frontal
HCP QB	271	2.176 ± 0.941	99 ± 46 [46.495]	0.604 ± 0.098	0.942 [0.89, 0.97]	R Frontal - R Parietal
HCP QB	272	2.941 ± 1.210	279 ± 130 [46.471]	0.533 ± 0.085	0.853 [0.72, 0.93]	L Frontal - L Frontal
HCP QB	273	2.944 ± 0.829	72 ± 37 [51.347]	0.476 ± 0.163	0.849 [0.72, 0.93]	R Frontal - R Frontal
HCP QB	274	2.630 ± 0.729	134 ± 70 [51.875]	0.523 ± 0.129	0.899 [0.81, 0.95]	R Frontal - R Parietal
HCP QB	275	3.090 ± 0.990	81 ± 49 [60.301]	0.469 ± 0.108	0.802 [0.65, 0.90]	R Parietal - R Parietal
HCP QB	276	2.164 ± 0.428	119 ± 43 [36.378]	0.654 ± 0.107	0.941 [0.88, 0.97]	L Parietal - L Parietal
HCP QB	277	3.026 ± 0.788	111 ± 92 [82.557]	0.450 ± 0.120	0.894 [0.79, 0.95]	L Parietal - L Parietal
HCP QB	278	2.328 ± 0.727	136 ± 86 [62.968]	0.542 ± 0.096	0.915 [0.84, 0.96]	R Frontal - R Parietal
HCP QB	279	2.333 ± 0.591	158 ± 52 [33.067]	0.593 ± 0.082	0.934 [0.86, 0.97]	R Frontal - R Frontal
HCP QB	280	2.721 ± 0.836	180 ± 61 [34.021]	0.533 ± 0.093	0.911 [0.83, 0.96]	L Frontal - L Frontal
HCP QB	281	2.954 ± 0.726	69 ± 44 [63.600]	0.401 ± 0.118	0.881 [0.79, 0.94]	L Parietal - L Parietal
HCP QB	282	2.359 ± 0.628	142 ± 82 [57.658]	0.536 ± 0.128	0.930 [0.87, 0.97]	R Frontal - R Frontal
HCP QB	283	2.918 ± 1.111	253 ± 100 [39.682]	0.628 ± 0.101	0.701 [0.52, 0.85]	L Frontal - L Frontal
HCP QB	284	2.637 ± 0.597	128 ± 72 [56.409]	0.529 ± 0.100	0.938 [0.89, 0.97]	R Parietal - R Parietal
HCP QB	285	2.766 ± 0.765	163 ± 113 [69.338]	0.501 ± 0.113	0.906 [0.83, 0.96]	R Frontal - R Frontal
HCP QB	286	3.147 ± 0.750	78 ± 56 [70.752]	0.466 ± 0.146	0.916 [0.85, 0.96]	R Parietal - R Parietal
HCP QB	287	3.116 ± 0.581	66 ± 33 [49.946]	0.403 ± 0.081	0.852 [0.73, 0.93]	R Frontal - R Frontal
HCP QB	288	2.408 ± 0.436	101 ± 29 [28.476]	0.568 ± 0.042	0.873 [0.77, 0.94]	L Frontal - L Frontal
HCP QB	289	3.087 ± 1.061	239 ± 147 [61.597]	0.582 ± 0.116	0.874 [0.77, 0.94]	R Parietal - R Parietal
HCP QB	290	3.181 ± 1.049	147 ± 70 [47.691]	0.493 ± 0.117	0.864 [0.74, 0.94]	R Parietal - R Parietal
HCP QB	291	2.583 ± 0.770	114 ± 57 [49.452]	0.493 ± 0.106	0.884 [0.78, 0.95]	L Temporal - L Temporal
HCP QB	292	4.066 ± 1.074	44 ± 25 [57.102]	0.381 ± 0.109	0.855 [0.74, 0.93]	R Temporal - R Temporal
HCP QB	293	2.385 ± 1.076	423 ± 93 [22.096]	0.641 ± 0.041	0.944 [0.88, 0.98]	R Temporal - R Temporal
HCP QB	294	2.608 ± 0.414	87 ± 42 [48.319]	0.515 ± 0.151	0.892 [0.80, 0.95]	R Frontal - R Parietal
HCP QB	295	2.727 ± 0.671	148 ± 65 [43.628]	0.608 ± 0.111	0.939 [0.88, 0.97]	R Frontal - R Cingulate
HCP QB	296	3.010 ± 0.674	155 ± 64 [41.074]	0.612 ± 0.082	0.921 [0.85, 0.96]	L Temporal - L Temporal
HCP QB	297	2.948 ± 0.967	161 ± 63 [38.742]	0.562 ± 0.077	0.899 [0.81, 0.95]	R Parietal - R Parietal
HCP QB	298	2.484 ± 0.531	218 ± 86 [39.406]	0.643 ± 0.111	0.916 [0.84, 0.96]	L Parietal - L Parietal
HCP QB	299	3.243 ± 0.972	164 ± 78 [47.768]	0.571 ± 0.079	0.845 [0.72, 0.93]	R Parietal - R Parietal
HCP QB	300	3.766 ± 1.042	274 ± 167 [61.052]	0.534 ± 0.126	0.807 [0.65, 0.91]	L Frontal - L Frontal
HCP QB	301	2.134 ± 0.760	103 ± 34 [33.094]	0.601 ± 0.087	0.928 [0.86, 0.97]	R Parietal - R Parietal
HCP QB	302	2.283 ± 0.384	298 ± 86 [28.869]	0.681 ± 0.053	0.938 [0.87, 0.97]	R Frontal - R Frontal
HCP QB	303	3.394 ± 0.654	32 ± 16 [48.279]	0.364 ± 0.111	0.883 [0.80, 0.94]	R Frontal - R Frontal
HCP QB	304	2.450 ± 0.456	165 ± 84 [50.881]	0.574 ± 0.089	0.938 [0.88, 0.97]	R Parietal - R Parietal
HCP QB	305	2.764 ± 0.796	113 ± 50 [44.799]	0.538 ± 0.100	0.876 [0.75, 0.95]	Cerebellum
HCP QB	306	2.656 ± 1.338	357 ± 125 [35.079]	0.667 ± 0.098	0.939 [0.88, 0.97]	L Parietal - L Parietal
HCP QB	307	2.737 ± 1.193	131 ± 78 [59.406]	0.500 ± 0.113	0.885 [0.78, 0.95]	R Frontal - R Parietal
HCP QB	308	3.276 ± 0.452	68 ± 55 [81.391]	0.441 ± 0.141	0.840 [0.72, 0.92]	R Frontal - R Frontal
HCP QB	309	4.059 ± 1.376	52 ± 24 [47.351]	0.340 ± 0.092	0.799 [0.63, 0.91]	R Frontal - R Frontal
HCP QB	310	2.997 ± 0.485	36 ± 29 [81.623]	0.357 ± 0.102	0.895 [0.82, 0.95]	L Frontal - L Frontal
HCP QB	311	3.312 ± 0.877	102 ± 72 [71.157]	0.487 ± 0.114	0.794 [0.62, 0.90]	R Frontal - R Frontal
HCP QB	312	3.175 ± 0.689	94 ± 34 [35.984]	0.557 ± 0.079	0.898 [0.80, 0.95]	R Frontal - R Frontal
HCP QB	313	2.272 ± 0.652	325 ± 76 [23.323]	0.611 ± 0.035	0.915 [0.82, 0.96]	R Frontal - R Frontal
HCP QB	314	2.847 ± 0.806	256 ± 103 [40.248]	0.680 ± 0.071	0.798 [0.66, 0.90]	L Temporal - L Temporal
HCP QB	315	2.501 ± 0.585	97 ± 43 [44.043]	0.564 ± 0.094	0.946 [0.90, 0.98]	L Frontal - L Parietal
HCP QB	316	2.022 ± 0.493	147 ± 50 [34.130]	0.589 ± 0.090	0.921 [0.85, 0.96]	R Parietal - R Parietal
HCP QB	317	2.966 ± 0.834	75 ± 40 [53.667]	0.577 ± 0.098	0.826 [0.70, 0.92]	R Parietal - R Cingulate
HCP QB	318	2.152 ± 0.372	154 ± 50 [32.475]	0.604 ± 0.068	0.903 [0.80, 0.96]	L Parietal - L Parietal
HCP QB	319	3.674 ± 0.757	15 ± 9 [56.331]	0.249 ± 0.084	0.856 [0.77, 0.93]	R Frontal - R Frontal
HCP QB	320	3.822 ± 0.444	33 ± 13 [40.786]	0.456 ± 0.066	0.860 [0.75, 0.93]	R Parietal - R Parietal
HCP QB	321	2.726 ± 0.737	57 ± 25 [43.674]	0.515 ± 0.139	0.871 [0.78, 0.94]	R Frontal - R Frontal
HCP QB	322	2.773 ± 0.855	450 ± 155 [34.446]	0.646 ± 0.059	0.749 [0.54, 0.88]	L Frontal - L Frontal
HCP QB	323	2.797 ± 0.791	149 ± 56 [37.330]	0.544 ± 0.075	0.889 [0.79, 0.95]	L Frontal - L Frontal
HCP QB	324	4.008 ± 0.760	40 ± 29 [71.095]	0.411 ± 0.129	0.898 [0.83, 0.95]	L Occipital - L Occipital
HCP QB	325	3.198 ± 0.756	98 ± 56 [56.657]	0.502 ± 0.114	0.864 [0.74, 0.94]	R Frontal - R Frontal
HCP QB	326	3.613 ± 0.539	18 ± 10 [56.866]	0.277 ± 0.089	0.877 [0.79, 0.94]	R Parietal - R Parietal
HCP QB	327	3.747 ± 0.836	39 ± 13 [33.183]	0.439 ± 0.088	0.848 [0.72, 0.93]	L Parietal - L Parietal
HCP QB	328	4.567 ± 0.724	21 ± 14 [66.210]	0.286 ± 0.106	0.862 [0.77, 0.93]	R Frontal - R Frontal
HCP QB	329	2.259 ± 0.589	95 ± 32 [33.999]	0.610 ± 0.068	0.904 [0.81, 0.96]	R Frontal - R Frontal
HCP QB	330	2.416 ± 0.670	138 ± 54 [39.536]	0.569 ± 0.076	0.911 [0.84, 0.96]	R Parietal - R Parietal
HCP QB	331	2.855 ± 0.724	129 ± 52 [40.273]	0.498 ± 0.084	0.919 [0.84, 0.96]	R Frontal - R Frontal
HCP QB	332	2.519 ± 0.706	114 ± 64 [56.550]	0.515 ± 0.090	0.879 [0.77, 0.95]	L Frontal - L Frontal
HCP QB	333	2.439 ± 0.450	162 ± 83 [51.154]	0.567 ± 0.110	0.905 [0.81, 0.96]	R Frontal - R Frontal
HCP QB	334	2.180 ± 0.437	170 ± 109 [64.200]	0.596 ± 0.125	0.927 [0.86, 0.97]	R Parietal - R Parietal
HCP QB	335	3.019 ± 0.835	79 ± 53 [67.437]	0.406 ± 0.075	0.837 [0.73, 0.92]	R Occipital - R Occipital
HCP QB	336	2.978 ± 0.974	90 ± 57 [63.527]	0.495 ± 0.153	0.898 [0.81, 0.95]	L Frontal - L Frontal
HCP QB	337	2.395 ± 1.183	174 ± 56 [32.448]	0.582 ± 0.106	0.945 [0.89, 0.98]	L Frontal - L Frontal
HCP QB	338	2.573 ± 0.719	44 ± 21 [48.992]	0.480 ± 0.087	0.818 [0.67, 0.91]	L Frontal - L Frontal
HCP QB	339	2.539 ± 0.645	54 ± 20 [37.046]	0.400 ± 0.085	0.854 [0.73, 0.93]	R Frontal - R Frontal
HCP QB	340	3.467 ± 0.775	59 ± 26 [44.807]	0.568 ± 0.100	0.883 [0.78, 0.95]	R Frontal - R Frontal
HCP QB	341	3.897 ± 0.602	28 ± 11 [39.856]	0.417 ± 0.082	0.932 [0.87, 0.97]	L Occipital - L Occipital
HCP QB	342	2.224 ± 0.674	195 ± 72 [37.034]	0.600 ± 0.085	0.917 [0.83, 0.96]	L Occipital - L Occipital
HCP QB	343	2.220 ± 0.548	34 ± 21 [63.524]	0.480 ± 0.113	0.925 [0.87, 0.97]	R Parietal - R Parietal
HCP QB	344	3.566 ± 0.974	50 ± 35 [69.434]	0.385 ± 0.130	0.786 [0.65, 0.89]	R Frontal - R Parietal
HCP QB	345	2.965 ± 0.848	43 ± 28 [65.680]	0.381 ± 0.110	0.881 [0.78, 0.94]	R Frontal - R Frontal
HCP QB	346	2.872 ± 0.716	61 ± 36 [59.394]	0.428 ± 0.113	0.885 [0.78, 0.95]	L Frontal - L Parietal
HCP QB	347	2.740 ± 0.497	135 ± 79 [58.696]	0.500 ± 0.090	0.854 [0.72, 0.93]	L Parietal - L Parietal
HCP QB	348	2.810 ± 0.828	97 ± 48 [49.310]	0.522 ± 0.158	0.356 [0.19, 0.57]	R Frontal - R Parietal
HCP QB	349	3.981 ± 0.967	14 ± 7 [51.420]	0.247 ± 0.092	0.777 [0.64, 0.89]	L Frontal - L Frontal
HCP QB	350	2.780 ± 0.662	75 ± 41 [54.903]	0.425 ± 0.088	0.906 [0.83, 0.96]	L Frontal - L Frontal
HCP QB	351	4.061 ± 0.900	23 ± 14 [60.734]	0.280 ± 0.100	0.872 [0.79, 0.94]	L Frontal - L Frontal
HCP QB	352	3.007 ± 0.710	69 ± 25 [36.710]	0.466 ± 0.060	0.922 [0.85, 0.97]	R Frontal - R Frontal
HCP QB	353	4.050 ± 1.142	39 ± 25 [63.419]	0.431 ± 0.132	0.908 [0.83, 0.96]	R Frontal - R Frontal
HCP QB	354	3.869 ± 0.987	37 ± 23 [63.372]	0.387 ± 0.103	0.900 [0.82, 0.95]	L Parietal - L Parietal
HCP QB	355	2.632 ± 0.777	22 ± 9 [41.526]	0.418 ± 0.107	0.898 [0.82, 0.95]	R Parietal - R Parietal
HCP QB	356	2.758 ± 0.753	38 ± 16 [43.114]	0.335 ± 0.096	0.752 [0.60, 0.88]	R Frontal - R Frontal
HCP QB	357	4.368 ± 1.211	17 ± 8 [49.984]	0.205 ± 0.069	0.732 [0.59, 0.86]	L Frontal - L Frontal
HCP QB	358	2.950 ± 0.377	157 ± 71 [45.371]	0.596 ± 0.106	0.928 [0.87, 0.97]	L Frontal - L Frontal
HCP QB	359	2.928 ± 0.607	77 ± 42 [54.935]	0.483 ± 0.113	0.833 [0.70, 0.92]	R Temporal - R Cingulate
HCP QB	360	3.214 ± 1.314	80 ± 34 [42.278]	0.449 ± 0.111	0.812 [0.68, 0.91]	R Frontal - R Frontal
HCP QB	361	3.221 ± 0.230	47 ± 18 [38.769]	0.551 ± 0.097	0.939 [0.89, 0.97]	R Frontal - R Frontal
HCP QB	362	3.671 ± 0.841	17 ± 10 [60.209]	0.216 ± 0.086	0.892 [0.82, 0.95]	L Temporal - L Temporal
HCP QB	363	2.724 ± 1.212	268 ± 163 [60.753]	0.590 ± 0.124	0.875 [0.76, 0.94]	L Parietal - L Parietal
HCP QB	364	1.939 ± 0.447	249 ± 62 [24.913]	0.618 ± 0.044	0.959 [0.92, 0.98]	R Parietal - R Parietal
HCP QB	365	3.467 ± 0.514	18 ± 8 [44.625]	0.259 ± 0.065	0.842 [0.74, 0.92]	R Frontal - R Frontal
HCP QB	366	4.358 ± 1.644	8 ± 5 [60.349]	0.147 ± 0.072	0.675 [0.53, 0.82]	Cerebellum
HCP QB	367	3.697 ± 0.781	39 ± 24 [62.271]	0.393 ± 0.129	0.825 [0.69, 0.92]	R Parietal - R Parietal
HCP QB	368	2.571 ± 0.511	119 ± 51 [42.832]	0.580 ± 0.084	0.927 [0.86, 0.97]	L Frontal - L Parietal
HCP QB	369	3.569 ± 0.845	10 ± 7 [75.001]	0.147 ± 0.087	0.817 [0.71, 0.91]	R Frontal - R Frontal
HCP QB	370	2.809 ± 0.602	22 ± 9 [39.741]	0.347 ± 0.076	0.802 [0.66, 0.90]	Cerebellum
HCP QB	371	1.931 ± 0.722	48 ± 26 [54.552]	0.535 ± 0.121	0.938 [0.88, 0.97]	L Frontal - L Frontal
HCP QB	372	3.232 ± 0.769	46 ± 40 [88.034]	0.367 ± 0.148	0.911 [0.84, 0.96]	L Parietal - L Parietal
HCP QB	373	1.662 ± 0.506	119 ± 39 [32.911]	0.538 ± 0.067	0.895 [0.79, 0.95]	L Occipital - L Occipital
HCP QB	374	3.680 ± 1.155	46 ± 39 [85.744]	0.343 ± 0.115	0.884 [0.78, 0.95]	L Frontal - L Frontal
HCP QB	375	3.868 ± 0.915	57 ± 36 [62.044]	0.346 ± 0.132	0.855 [0.75, 0.93]	L Frontal - L Temporal
HCP QB	376	3.739 ± 1.498	72 ± 29 [40.562]	0.354 ± 0.069	0.742 [0.57, 0.87]	L Parietal - L Parietal
HCP QB	377	2.812 ± 0.723	75 ± 41 [54.224]	0.571 ± 0.121	0.935 [0.88, 0.97]	R Frontal - R Frontal
HCP QB	378	2.482 ± 0.409	137 ± 56 [40.798]	0.656 ± 0.052	0.817 [0.67, 0.91]	L Parietal - L Temporal
HCP QB	379	8.009 ± 0.832	16 ± 15 [91.366]	0.199 ± 0.115	0.849 [0.75, 0.93]	R Temporal - R Temporal
HCP QB	380	2.390 ± 0.602	201 ± 81 [40.437]	0.701 ± 0.110	0.568 [0.35, 0.77]	L Frontal - L Frontal
HCP QB	381	2.731 ± 0.430	11 ± 5 [42.472]	0.182 ± 0.047	0.794 [0.67, 0.90]	L Frontal - L Parietal
HCP QB	382	4.290 ± 1.481	14 ± 16 [109.828]	0.171 ± 0.097	0.806 [0.70, 0.90]	L Frontal - L Frontal
HCP QB	383	2.411 ± 0.538	212 ± 103 [48.453]	0.594 ± 0.089	0.869 [0.75, 0.94]	R Frontal - R Frontal
HCP QB	384	4.826 ± 1.044	18 ± 9 [48.679]	0.281 ± 0.080	0.860 [0.75, 0.93]	R Parietal - R Parietal
HCP QB	385	3.137 ± 0.695	116 ± 66 [56.702]	0.506 ± 0.122	0.896 [0.79, 0.95]	R Frontal - R Frontal
HCP QB	386	2.271 ± 1.033	26 ± 14 [54.338]	0.372 ± 0.127	0.876 [0.80, 0.94]	R Frontal - R Frontal
HCP QB	387	3.201 ± 1.027	68 ± 49 [71.673]	0.358 ± 0.165	0.752 [0.60, 0.87]	L Parietal - L Parietal
HCP QB	388	2.475 ± 0.923	45 ± 25 [55.344]	0.404 ± 0.129	0.810 [0.67, 0.91]	L Frontal - L Frontal
HCP QB	389	2.593 ± 0.616	39 ± 18 [45.486]	0.451 ± 0.095	0.866 [0.77, 0.94]	L Parietal - L Parietal
HCP QB	390	2.468 ± 0.879	103 ± 62 [60.517]	0.511 ± 0.126	0.886 [0.79, 0.95]	L Frontal - L Parietal
HCP QB	391	2.800 ± 2.068	707 ± 310 [43.809]	0.792 ± 0.140	0.790 [0.63, 0.90]	R Frontal - R Frontal
HCP QB	392	4.051 ± 2.277	333 ± 169 [50.683]	0.599 ± 0.145	0.632 [0.43, 0.81]	L Frontal - L Frontal
HCP QB	393	2.677 ± 0.511	65 ± 32 [48.782]	0.538 ± 0.073	0.946 [0.90, 0.98]	R Frontal - R Frontal
HCP QB	394	2.899 ± 1.264	59 ± 25 [42.645]	0.444 ± 0.088	0.575 [0.39, 0.76]	R Frontal - R Frontal
HCP QB	395	2.064 ± 0.316	501 ± 66 [13.123]	0.875 ± 0.020	0.465 [0.26, 0.69]	R Occipital - R Occipital
HCP QB	396	3.326 ± 1.389	184 ± 56 [30.541]	0.584 ± 0.047	0.432 [0.23, 0.66]	L Parietal - L Parietal
HCP QB	397	3.661 ± 1.680	41 ± 31 [76.930]	0.252 ± 0.128	0.683 [0.51, 0.83]	L Occipital - L Occipital
HCP QB	398	3.125 ± 0.842	24 ± 14 [59.639]	0.247 ± 0.099	0.816 [0.70, 0.91]	L Frontal - L Frontal
HCP QB	399	-	-	-	-	L Frontal - L Frontal
HCP QB	400	4.157 ± 1.049	54 ± 35 [63.950]	0.386 ± 0.123	0.865 [0.76, 0.94]	L Parietal - L Parietal
HCP QB	401	2.712 ± 0.866	58 ± 30 [52.728]	0.500 ± 0.119	0.875 [0.76, 0.94]	L Frontal - L Frontal
HCP QB	402	3.321 ± 0.597	77 ± 33 [42.542]	0.506 ± 0.118	0.856 [0.75, 0.93]	L Frontal - L Frontal
HCP QB	403	3.967 ± 0.895	34 ± 21 [61.702]	0.380 ± 0.118	0.843 [0.73, 0.92]	R Frontal - R Frontal
HCP QB	404	3.145 ± 1.114	138 ± 73 [53.012]	0.529 ± 0.104	0.910 [0.83, 0.96]	L Parietal - L Parietal
HCP QB	405	2.407 ± 0.643	76 ± 27 [36.286]	0.563 ± 0.084	0.917 [0.83, 0.96]	R Frontal - R Frontal
HCP QB	406	2.494 ± 0.373	26 ± 13 [50.699]	0.370 ± 0.080	0.344 [0.20, 0.55]	L Frontal - L Frontal
HCP QB	407	4.169 ± 0.526	34 ± 26 [77.019]	0.346 ± 0.120	0.907 [0.84, 0.96]	R Frontal - R Frontal
HCP QB	408	5.651 ± 1.412	3 ± 2 [75.814]	0.062 ± 0.047	0.482 [0.33, 0.68]	L Frontal - L Frontal
HCP QB	409	-	-	-	-	R Occipital - R Occipital
HCP QB	410	3.308 ± 1.077	67 ± 38 [56.518]	0.376 ± 0.131	0.924 [0.87, 0.96]	L Frontal - L Frontal
HCP QB	411	4.511 ± 1.293	7 ± 5 [78.018]	0.106 ± 0.060	0.720 [0.58, 0.85]	L Frontal - L Frontal
HCP QB	412	3.092 ± 0.986	23 ± 21 [88.969]	0.328 ± 0.142	0.829 [0.72, 0.92]	L Frontal - L Temporal
HCP QB	413	2.464 ± 1.210	695 ± 204 [29.349]	0.852 ± 0.085	0.433 [0.24, 0.66]	L Occipital - L Occipital
HCP QB	414	3.311 ± 1.072	176 ± 129 [73.460]	0.496 ± 0.126	0.895 [0.81, 0.95]	Cerebellum
HCP QB	415	3.522 ± 0.601	17 ± 8 [46.424]	0.348 ± 0.068	0.890 [0.82, 0.95]	R Parietal - R Parietal
HCP QB	416	4.760 ± 1.871	3 ± 2 [66.935]	0.056 ± 0.038	0.709 [0.57, 0.84]	L Parietal - L Occipital
HCP QB	417	3.383 ± 0.637	20 ± 10 [51.733]	0.349 ± 0.072	0.863 [0.77, 0.93]	R Parietal - R Parietal
HCP QB	418	2.528 ± 0.516	124 ± 65 [52.164]	0.650 ± 0.119	0.301 [0.15, 0.52]	R Frontal - R Frontal
HCP QB	419	3.448 ± 1.266	17 ± 9 [53.400]	0.214 ± 0.070	0.739 [0.59, 0.86]	R Parietal - R Parietal
HCP QB	420	2.467 ± 0.762	28 ± 18 [67.081]	0.329 ± 0.107	0.884 [0.80, 0.94]	L Parietal - L Parietal
HCP QB	421	-	-	-	-	R Parietal - R Parietal
HCP QB	422	2.397 ± 0.532	510 ± 186 [36.551]	0.805 ± 0.046	0.833 [0.69, 0.92]	L Frontal - L Frontal
HCP QB	423	3.997 ± 1.531	87 ± 40 [46.226]	0.401 ± 0.123	0.868 [0.76, 0.94]	R Frontal - R Cingulate
HCP QB	424	2.254 ± 0.574	54 ± 32 [59.496]	0.492 ± 0.117	0.949 [0.91, 0.98]	L Frontal - L Frontal
HCP QB	425	2.824 ± 1.820	145 ± 57 [39.107]	0.534 ± 0.152	0.520 [0.31, 0.73]	L Temporal - L Temporal
HCP QB	426	3.609 ± 1.784	19 ± 11 [58.012]	0.286 ± 0.098	0.841 [0.73, 0.92]	R Frontal - R Parietal
HCP QB	427	2.933 ± 1.935	255 ± 104 [40.784]	0.664 ± 0.152	0.766 [0.60, 0.89]	R Parietal - R Temporal
HCP QB	428	3.314 ± 0.937	23 ± 16 [69.263]	0.323 ± 0.134	0.878 [0.79, 0.94]	L Parietal - L Parietal
HCP QB	429	4.692 ± 1.661	20 ± 13 [65.758]	0.172 ± 0.075	0.694 [0.53, 0.84]	L Frontal - L Frontal
HCP QB	430	2.466 ± 0.792	132 ± 58 [43.678]	0.634 ± 0.083	0.953 [0.91, 0.98]	R Frontal - R Frontal
HCP QB	431	2.848 ± 1.047	34 ± 24 [71.192]	0.386 ± 0.130	0.833 [0.72, 0.92]	L Frontal - L Frontal
HCP QB	432	2.736 ± 0.921	157 ± 69 [43.686]	0.559 ± 0.097	0.940 [0.88, 0.97]	R Frontal - R Frontal
HCP QB	433	3.096 ± 0.638	110 ± 55 [50.554]	0.529 ± 0.105	0.907 [0.83, 0.96]	R Parietal - R Parietal
HCP QB	434	5.142 ± 1.704	10 ± 9 [87.912]	0.119 ± 0.065	0.862 [0.77, 0.93]	R Parietal - R Parietal
HCP QB	435	5.405 ± 0.745	13 ± 5 [39.800]	0.295 ± 0.060	0.839 [0.74, 0.92]	L Parietal - L Parietal
HCP QB	436	2.844 ± 0.738	51 ± 30 [59.297]	0.403 ± 0.105	0.903 [0.82, 0.96]	R Frontal - R Frontal
HCP QB	437	2.753 ± 0.704	55 ± 26 [46.642]	0.398 ± 0.077	0.827 [0.71, 0.92]	L Frontal - L Parietal
HCP QB	438	5.675 ± 2.622	10 ± 7 [68.769]	0.198 ± 0.098	0.573 [0.41, 0.75]	R Parietal - R Parietal
HCP QB	439	2.769 ± 0.473	15 ± 9 [58.738]	0.381 ± 0.100	0.797 [0.66, 0.90]	R Frontal - R Frontal
HCP QB	440	2.928 ± 1.069	28 ± 17 [61.373]	0.344 ± 0.102	0.873 [0.78, 0.94]	R Parietal - R Parietal
HCP QB	441	5.142 ± 3.336	115 ± 65 [56.634]	0.421 ± 0.193	0.420 [0.23, 0.64]	R Occipital - R Occipital
HCP QB	442	3.359 ± 1.939	35 ± 18 [51.373]	0.287 ± 0.102	0.419 [0.26, 0.63]	L Frontal - L Frontal
HCP QB	443	3.285 ± 1.715	5 ± 2 [45.197]	0.122 ± 0.080	0.761 [0.64, 0.87]	L Parietal - L Parietal
HCP QB	444	2.757 ± 0.558	29 ± 11 [37.525]	0.272 ± 0.059	0.599 [0.42, 0.78]	L Temporal - L Occipital
HCP QB	445	3.904 ± 1.615	149 ± 94 [62.750]	0.456 ± 0.142	0.874 [0.78, 0.94]	R Frontal - R Frontal
HCP QB	446	2.641 ± 0.708	30 ± 14 [46.896]	0.408 ± 0.111	0.872 [0.78, 0.94]	R Frontal - R Frontal
HCP QB	447	3.636 ± 1.336	8 ± 5 [63.031]	0.161 ± 0.078	0.727 [0.59, 0.85]	R Frontal - R Frontal
HCP QB	448	5.555 ± 2.394	46 ± 43 [92.253]	0.221 ± 0.126	0.384 [0.23, 0.59]	R Frontal - R Frontal
HCP QB	449	-	-	-	-	L Frontal - L Parietal
HCP QB	450	2.410 ± 0.829	54 ± 22 [41.380]	0.423 ± 0.111	0.911 [0.83, 0.96]	L Frontal - L Temporal
HCP QB	451	2.954 ± 0.860	30 ± 24 [79.004]	0.354 ± 0.141	0.850 [0.74, 0.93]	R Parietal - R Parietal
HCP QB	452	5.434 ± 2.028	6 ± 3 [52.931]	0.084 ± 0.040	0.403 [0.26, 0.61]	L Frontal - L Frontal
HCP QB	453	3.229 ± 1.565	12 ± 10 [83.735]	0.193 ± 0.106	0.802 [0.69, 0.90]	Cerebellum
HCP QB	454	3.034 ± 0.719	21 ± 14 [67.264]	0.210 ± 0.084	0.450 [0.28, 0.66]	L Frontal - L Cingulate
HCP QB	455	7.251 ± 1.954	4 ± 3 [60.848]	0.062 ± 0.044	0.485 [0.33, 0.68]	R Frontal - R Frontal
HCP QB	456	-	-	-	-	L Frontal - L Cingulate
HCP QB	457	2.956 ± 1.220	85 ± 29 [33.789]	0.532 ± 0.080	0.732 [0.57, 0.86]	R Parietal - R Parietal
HCP QB	458	2.118 ± 0.327	46 ± 16 [35.085]	0.606 ± 0.099	0.923 [0.86, 0.96]	L Occipital - L Occipital
HCP QB	459	4.187 ± 1.010	13 ± 7 [56.978]	0.220 ± 0.076	0.755 [0.60, 0.88]	R Parietal - R Parietal
HCP QB	460	-	-	-	-	L Frontal - L Frontal
HCP QB	461	2.345 ± 0.661	12 ± 7 [52.501]	0.330 ± 0.079	0.881 [0.80, 0.94]	Cerebellum
HCP QB	462	4.041 ± 1.606	7 ± 5 [60.927]	0.209 ± 0.103	0.597 [0.44, 0.77]	L Frontal - L Frontal
HCP QB	463	-	-	-	-	L Frontal - L Frontal
HCP QB	464	-	-	-	-	L Frontal - L Frontal
HCP QB	465	3.809 ± 2.016	16 ± 11 [68.968]	0.222 ± 0.111	0.833 [0.73, 0.92]	L Frontal - L Frontal
HCP QB	466	2.794 ± 1.280	38 ± 28 [74.679]	0.366 ± 0.146	0.846 [0.73, 0.93]	R Frontal - R Frontal
HCP QB	467	5.203 ± 2.437	5 ± 4 [70.851]	0.076 ± 0.045	0.352 [0.22, 0.55]	L Parietal - L Parietal
HCP QB	468	-	-	-	-	R Frontal - R Cingulate
HCP QB	469	-	-	-	-	L Parietal - L Occipital
HCP QB	470	-	-	-	-	L Frontal - L Frontal
HCP QB	471	-	-	-	-	R Frontal - R Frontal
HCP QB	472	-	-	-	-	L Frontal - L Frontal
HCP QB	473	7.214 ± 3.068	4 ± 3 [79.624]	0.045 ± 0.048	0.299 [0.18, 0.50]	L Frontal - L Frontal
HCP QB	474	-	-	-	-	R Parietal - R Parietal
HCP QB	475	-	-	-	-	R Parietal - R Parietal
HCP QB	476	-	-	-	-	R Occipital - R Occipital
HCP QB	477	3.213 ± 2.197	9 ± 6 [63.106]	0.211 ± 0.115	0.675 [0.51, 0.83]	L Occipital - L Occipital
HCP QB	478	-	-	-	-	L Frontal - L Frontal
HCP QB	479	2.509 ± 0.901	19 ± 6 [33.130]	0.213 ± 0.045	0.678 [0.52, 0.83]	L Parietal - L Parietal
HCP QB	480	-	-	-	-	L Frontal - L Temporal
HCP QB	481	2.790 ± 1.116	11 ± 7 [65.210]	0.236 ± 0.100	0.612 [0.43, 0.79]	R Frontal - R Frontal
HCP QB	482	-	-	-	-	L Frontal - L Frontal
HCP QB	483	-	-	-	-	L Frontal - L Frontal
HCP QB	484	2.025 ± 0.388	22 ± 11 [50.044]	0.364 ± 0.090	0.897 [0.82, 0.95]	L Parietal - L Parietal
HCP QB	485	3.407 ± 1.620	24 ± 17 [69.651]	0.259 ± 0.130	0.531 [0.37, 0.72]	L Frontal - L Frontal
HCP QB	486	-	-	-	-	R Parietal - R Parietal
HCP QB	487	2.568 ± 1.523	26 ± 14 [55.562]	0.293 ± 0.094	0.762 [0.63, 0.88]	Cerebellum
HCP QB	488	4.652 ± 3.556	11 ± 9 [81.668]	0.144 ± 0.098	0.143 [0.07, 0.30]	L Frontal - L Frontal
HCP QB	489	-	-	-	-	L Occipital - L Occipital
HCP QB	490	3.840 ± 1.529	12 ± 6 [51.620]	0.143 ± 0.056	0.538 [0.36, 0.73]	Cerebellum
HCP QB	491	4.150 ± 1.606	21 ± 19 [87.779]	0.237 ± 0.117	0.656 [0.49, 0.81]	L Frontal - L Frontal
HCP QB	492	-	-	-	-	L Frontal - L Cingulate
HCP QB	493	5.064 ± 4.734	77 ± 43 [56.067]	0.308 ± 0.131	0.292 [0.16, 0.50]	L Parietal - L Parietal
HCP QB	494	6.359 ± 3.489	45 ± 30 [66.848]	0.254 ± 0.126	0.605 [0.44, 0.78]	L Frontal - L Frontal
HCP QB	495	3.510 ± 1.769	9 ± 6 [60.424]	0.122 ± 0.064	0.577 [0.39, 0.76]	R Frontal - R Parietal
HCP QB	496	3.325 ± 1.640	10 ± 7 [71.114]	0.267 ± 0.116	0.715 [0.57, 0.85]	R Frontal - R Frontal
HCP QB	497	-	-	-	-	R Frontal - R Frontal
[truncated: 2 more rows]
