# Supplementary material for: Assessing the Reliability of Template-Based Clustering for Tractography in Healthy Human Adults
Source: Front Neuroinform. 2022 Feb 17;16:777853. doi: 10.3389/fninf.2022.777853 (PMC8891507; doi:10.3389/fninf.2022.777853)
Supplement: Supplementary file 3 [file Table_3.XLSX]

## Sheet: Table S3
Table S3. Summarized "U"-shaped tract metrics by lobular organization as defined by Freesurfer parcellations, including the number of clusters found between connected lobes. Lobes connected in only one hemisphere appear near the bottom of the list with respect to the hemisphere. Cerebellar connectivity is excluded.
Dataset	Connectivity	No. clusters	Euclidean Distance [mm] (avg ± sd)	Streamline count (avg ± sd) [CV %]	wDSC (avg ± sd)	ICC [95% CI]
MyConnectome	Cerebellum	14	3.833 ± 1.044	191 ± 197 [27.228]	0.488 ± 0.178	0.697 [0.55, 0.83]
MyConnectome	L Frontal - L Cingulate	3	3.424 ± 0.485	64 ± 41 [14.154]	0.488 ± 0.184	0.882 [0.80, 0.94]
MyConnectome	L Frontal - L Frontal	107	2.418 ± 0.597	82 ± 60 [24.690]	0.602 ± 0.166	0.947 [0.91, 0.97]
MyConnectome	L Frontal - L Parietal	22	2.487 ± 0.563	56 ± 37 [22.634]	0.613 ± 0.120	0.948 [0.91, 0.97]
MyConnectome	L Frontal - L Temporal	4	3.144 ± 0.802	66 ± 40 [25.510]	0.451 ± 0.134	0.899 [0.82, 0.95]
MyConnectome	L Occipital - L Occipital	15	2.365 ± 0.369	192 ± 150 [15.616]	0.714 ± 0.117	0.953 [0.92, 0.98]
MyConnectome	L Parietal - L Cingulate	1	1.534 ± 0	328 ± 0 [0]	0.837 ± 0	0.987 [0.98, 0.99]
MyConnectome	L Parietal - L Occipital	4	1.813 ± 0.297	81 ± 35 [16.380]	0.657 ± 0.020	0.973 [0.95, 0.99]
MyConnectome	L Parietal - L Parietal	63	2.525 ± 0.703	77 ± 56 [27.845]	0.614 ± 0.153	0.958 [0.93, 0.98]
MyConnectome	L Parietal - L Temporal	4	2.701 ± 0.845	73 ± 17 [31.284]	0.608 ± 0.091	0.962 [0.93, 0.98]
MyConnectome	L Temporal - L Occipital	1	2.297 ± 0	88 ± 0 [0]	0.657 ± 0	0.930 [0.86, 0.97]
MyConnectome	L Temporal - L Temporal	16	2.627 ± 0.731	139 ± 120 [27.840]	0.619 ± 0.150	0.957 [0.92, 0.98]
MyConnectome	R Frontal - R Cingulate	3	2.625 ± 0.575	183 ± 62 [21.893]	0.751 ± 0.113	0.973 [0.95, 0.99]
MyConnectome	R Frontal - R Frontal	112	2.402 ± 0.597	79 ± 56 [24.840]	0.620 ± 0.153	0.938 [0.90, 0.97]
MyConnectome	R Frontal - R Parietal	24	2.417 ± 0.582	61 ± 48 [24.082]	0.610 ± 0.129	0.936 [0.89, 0.97]
MyConnectome	R Frontal - R Temporal	1	6.722 ± 0	618 ± 0 [0]	0.679 ± 0	0.974 [0.95, 0.99]
MyConnectome	R Occipital - R Occipital	13	2.177 ± 0.487	140 ± 98 [22.359]	0.653 ± 0.138	0.947 [0.90, 0.97]
MyConnectome	R Parietal - R Cingulate	1	3.094 ± 0	197 ± 0 [0]	0.681 ± 0	0.976 [0.95, 0.99]
MyConnectome	R Parietal - R Parietal	73	2.605 ± 0.923	66 ± 73 [35.423]	0.564 ± 0.165	0.942 [0.90, 0.97]
MyConnectome	R Parietal - R Temporal	6	2.971 ± 0.737	116 ± 111 [24.815]	0.630 ± 0.178	0.947 [0.91, 0.97]
MyConnectome	R Temporal - R Cingulate	1	3.715 ± 0	332 ± 0 [0]	0.577 ± 0	0.884 [0.77, 0.95]
MyConnectome	R Temporal - R Temporal	12	2.734 ± 0.622	135 ± 91 [22.758]	0.617 ± 0.095	0.948 [0.91, 0.98]
HCP	Cerebellum	14	3.218 ± 1.301	346 ± 221 [40.436]	0.668 ± 0.146	0.633 [0.44, 0.80]
HCP	L Frontal - L Cingulate	3	3.176 ± 0.318	103 ± 51 [10.004]	0.471 ± 0.083	0.847 [0.74, 0.93]
HCP	L Frontal - L Frontal	107	2.877 ± 0.529	117 ± 82 [18.371]	0.507 ± 0.117	0.894 [0.81, 0.95]
HCP	L Frontal - L Parietal	22	2.749 ± 0.728	92 ± 52 [26.494]	0.598 ± 0.098	0.913 [0.84, 0.96]
HCP	L Frontal - L Temporal	4	4.303 ± 1.086	53 ± 32 [25.230]	0.367 ± 0.053	0.829 [0.71, 0.92]
HCP	L Occipital - L Occipital	15	2.972 ± 0.471	266 ± 229 [15.844]	0.552 ± 0.120	0.875 [0.78, 0.94]
HCP	L Parietal - L Cingulate	1	3.312 ± 0	361 ± 0 [0]	0.650 ± 0	0.953 [0.91, 0.98]
HCP	L Parietal - L Occipital	4	2.778 ± 0.521	129 ± 91 [18.737]	0.493 ± 0.100	0.890 [0.79, 0.95]
HCP	L Parietal - L Parietal	63	3.311 ± 0.727	113 ± 85 [21.968]	0.462 ± 0.117	0.899 [0.82, 0.95]
HCP	L Parietal - L Temporal	4	2.917 ± 0.494	111 ± 26 [16.940]	0.601 ± 0.073	0.886 [0.78, 0.95]
HCP	L Temporal - L Occipital	1	2.657 ± 0	108 ± 0 [0]	0.484 ± 0	0.913 [0.83, 0.96]
HCP	L Temporal - L Temporal	16	2.967 ± 0.544	203 ± 146 [18.329]	0.549 ± 0.080	0.903 [0.81, 0.96]
HCP	R Frontal - R Cingulate	3	2.738 ± 0.388	175 ± 43 [14.168]	0.576 ± 0.042	0.911 [0.83, 0.96]
HCP	R Frontal - R Frontal	112	2.892 ± 0.518	104 ± 59 [17.903]	0.505 ± 0.105	0.879 [0.79, 0.94]
HCP	R Frontal - R Parietal	24	2.706 ± 0.692	95 ± 69 [25.554]	0.623 ± 0.127	0.908 [0.84, 0.95]
HCP	R Frontal - R Temporal	1	5.117 ± 0	1432 ± 0 [0]	0.727 ± 0	0.856 [0.71, 0.94]
HCP	R Occipital - R Occipital	13	2.625 ± 0.256	251 ± 199 [9.751]	0.549 ± 0.119	0.894 [0.79, 0.95]
HCP	R Parietal - R Cingulate	1	2.905 ± 0	423 ± 0 [0]	0.681 ± 0	0.942 [0.88, 0.97]
HCP	R Parietal - R Parietal	73	3.146 ± 0.751	109 ± 98 [23.881]	0.476 ± 0.119	0.885 [0.79, 0.95]
HCP	R Parietal - R Temporal	6	2.937 ± 0.645	176 ± 192 [21.958]	0.562 ± 0.111	0.898 [0.81, 0.95]
HCP	R Temporal - R Cingulate	1	2.773 ± 0	450 ± 0 [0]	0.646 ± 0	0.749 [0.54, 0.88]
HCP	R Temporal - R Temporal	12	3.138 ± 0.610	210 ± 147 [19.440]	0.566 ± 0.094	0.894 [0.80, 0.95]
MyConnectome QB	Cerebellum	14	2.721 ± 1.032	81 ± 63 [37.922]	0.505 ± 0.233	0.890 [0.82, 0.95]
MyConnectome QB	L Frontal - L Cingulate	3	3.874 ± 0	11 ± 0 [0]	0.122 ± 0	0.426 [0.29, 0.61]
MyConnectome QB	L Frontal - L Frontal	107	2.665 ± 1.051	94 ± 76 [39.434]	0.596 ± 0.210	0.882 [0.83, 0.93]
MyConnectome QB	L Frontal - L Parietal	22	2.313 ± 0.392	115 ± 70 [16.968]	0.689 ± 0.134	0.957 [0.93, 0.98]
MyConnectome QB	L Frontal - L Temporal	4	3.199 ± 1.163	24 ± 15 [36.364]	0.341 ± 0.144	0.738 [0.56, 0.87]
MyConnectome QB	L Occipital - L Occipital	15	2.935 ± 0.978	76 ± 61 [33.320]	0.531 ± 0.252	0.841 [0.77, 0.91]
MyConnectome QB	L Parietal - L Cingulate	1	5.710 ± 0	73 ± 0 [0]	0.517 ± 0	0.947 [0.91, 0.98]
MyConnectome QB	L Parietal - L Occipital	4	2.846 ± 0.231	117 ± 26 [8.110]	0.727 ± 0.115	0.715 [0.63, 0.81]
MyConnectome QB	L Parietal - L Parietal	63	2.644 ± 0.795	103 ± 96 [30.065]	0.613 ± 0.199	0.910 [0.87, 0.95]
MyConnectome QB	L Parietal - L Temporal	4	2.285 ± 0.383	107 ± 60 [16.751]	0.689 ± 0.090	0.950 [0.91, 0.97]
MyConnectome QB	L Temporal - L Occipital	1	0 ± 0	0 ± 0 [0]	0 ± 0	0.240 [0.13, 0.43]
MyConnectome QB	L Temporal - L Temporal	16	2.566 ± 0.713	115 ± 96 [27.782]	0.632 ± 0.157	0.943 [0.90, 0.97]
MyConnectome QB	R Frontal - R Cingulate	3	2.551 ± 1.043	63 ± 64 [40.884]	0.481 ± 0.351	0.859 [0.79, 0.93]
MyConnectome QB	R Frontal - R Frontal	112	2.711 ± 0.955	87 ± 81 [35.243]	0.583 ± 0.203	0.908 [0.86, 0.95]
MyConnectome QB	R Frontal - R Parietal	24	2.596 ± 0.661	84 ± 56 [25.470]	0.580 ± 0.193	0.937 [0.89, 0.97]
MyConnectome QB	R Frontal - R Temporal	1	1.737 ± 0	153 ± 0 [0]	0.722 ± 0	0.985 [0.97, 0.99]
MyConnectome QB	R Occipital - R Occipital	13	2.510 ± 0.495	105 ± 73 [19.720]	0.614 ± 0.178	0.860 [0.80, 0.91]
MyConnectome QB	R Parietal - R Cingulate	1	2.694 ± 0	30 ± 0 [0]	0.401 ± 0	0.893 [0.82, 0.95]
MyConnectome QB	R Parietal - R Parietal	73	2.606 ± 0.991	94 ± 66 [38.008]	0.604 ± 0.191	0.920 [0.87, 0.96]
MyConnectome QB	R Parietal - R Temporal	6	2.659 ± 0.911	101 ± 45 [34.244]	0.622 ± 0.100	0.958 [0.92, 0.98]
MyConnectome QB	R Temporal - R Cingulate	1	2.647 ± 0	41 ± 0 [0]	0.497 ± 0	0.936 [0.89, 0.97]
MyConnectome QB	R Temporal - R Temporal	12	2.755 ± 1.106	135 ± 74 [40.148]	0.707 ± 0.146	0.946 [0.91, 0.97]
HCP QB	Cerebellum	14	3.117 ± 0.828	114 ± 108 [26.552]	0.424 ± 0.178	0.820 [0.70, 0.91]
HCP QB	L Frontal - L Cingulate	3	3.034 ± 0	21 ± 0 [0]	0.210 ± 0	0.385 [0.25, 0.57]
HCP QB	L Frontal - L Frontal	107	3.117 ± 0.938	135 ± 106 [30.107]	0.495 ± 0.171	0.810 [0.71, 0.89]
HCP QB	L Frontal - L Parietal	22	2.830 ± 0.401	169 ± 102 [14.171]	0.554 ± 0.113	0.896 [0.81, 0.95]
HCP QB	L Frontal - L Temporal	4	3.123 ± 0.730	45 ± 19 [23.364]	0.366 ± 0.050	0.786 [0.67, 0.89]
HCP QB	L Occipital - L Occipital	15	3.181 ± 1.093	152 ± 180 [34.360]	0.486 ± 0.202	0.789 [0.69, 0.88]
HCP QB	L Parietal - L Cingulate	1	6.601 ± 0	122 ± 0 [0]	0.561 ± 0	0.907 [0.83, 0.96]
HCP QB	L Parietal - L Occipital	4	3.434 ± 1.154	101 ± 100 [33.615]	0.401 ± 0.300	0.760 [0.65, 0.87]
HCP QB	L Parietal - L Parietal	63	3.075 ± 0.743	144 ± 128 [24.174]	0.516 ± 0.145	0.867 [0.78, 0.93]
HCP QB	L Parietal - L Temporal	4	2.860 ± 0.479	184 ± 114 [16.744]	0.621 ± 0.106	0.905 [0.82, 0.96]
HCP QB	L Temporal - L Occipital	1	2.757 ± 0	29 ± 0 [0]	0.272 ± 0	0.599 [0.42, 0.78]
HCP QB	L Temporal - L Temporal	16	3.124 ± 0.597	164 ± 108 [19.099]	0.555 ± 0.113	0.871 [0.78, 0.94]
HCP QB	R Frontal - R Cingulate	3	3.362 ± 0.898	118 ± 43 [26.711]	0.504 ± 0.146	0.808 [0.70, 0.90]
HCP QB	R Frontal - R Frontal	112	3.004 ± 0.776	129 ± 104 [25.837]	0.511 ± 0.141	0.863 [0.77, 0.93]
HCP QB	R Frontal - R Parietal	24	2.800 ± 0.531	137 ± 89 [18.979]	0.540 ± 0.137	0.874 [0.79, 0.93]
HCP QB	R Frontal - R Temporal	1	2.746 ± 0	389 ± 0 [0]	0.662 ± 0	0.932 [0.86, 0.97]
HCP QB	R Occipital - R Occipital	13	2.945 ± 0.832	207 ± 119 [28.264]	0.612 ± 0.128	0.786 [0.68, 0.88]
HCP QB	R Parietal - R Cingulate	1	2.966 ± 0	75 ± 0 [0]	0.577 ± 0	0.826 [0.70, 0.92]
HCP QB	R Parietal - R Parietal	73	3.050 ± 0.690	125 ± 78 [22.625]	0.524 ± 0.140	0.878 [0.79, 0.94]
HCP QB	R Parietal - R Temporal	6	3.122 ± 0.829	174 ± 70 [26.548]	0.565 ± 0.082	0.881 [0.78, 0.94]
HCP QB	R Temporal - R Cingulate	1	2.928 ± 0	77 ± 0 [0]	0.483 ± 0	0.833 [0.70, 0.92]
HCP QB	R Temporal - R Temporal	12	3.254 ± 1.577	223 ± 157 [48.467]	0.585 ± 0.159	0.889 [0.80, 0.95]
